# Supplementary material for: A Phase 1 Study of 131I-CLR1404 in Patients with Relapsed or Refractory Advanced Solid Tumors: Dosimetry, Biodistribution, Pharmacokinetics, and Safety
Source: PubMed Central journal article supplement (PMC4234270; doi:10.1371/journal.pone.0111652), 2014-11-17
Supplement: pone.0111652.s003.pdf [file pone.0111652.s003.pdf]

## RESULTS

Figure 1: Individual Subject Results

### *Duke, Subject 301 (Male)*

|                          | Total Body | Kidneys | Liver  | Spleen | Lungs  | GI    | Blood |
|--------------------------|------------|---------|--------|--------|--------|-------|-------|
| Fraction 1               | 1.0        | -0.0150 | 0.0552 | 0.0263 | 0.0347 | 5.00% | 0.543 |
| T <sub>1/2</sub> -1 (hr) | 10080      | 6.58    | 6.84   | 1.15   | 2.96   |       | 5.5   |
| Fraction 2               |            | 0.0356  | 0.0697 | 0.0207 | 0.0431 |       | 0.322 |
| T <sub>1/2</sub> -2 (hr) |            | 614     | 1410   | 567    | ∞      |       | 146   |
| N (Bq-hr/Bq admin)       | 265.5      | 7.4     | 17.5   | 4.3    | 12.1   |       |       |

Kinetic Data: (the form is  $f_1 \cdot \exp(-0.693 \cdot t/T_{1/2-1}) + f_2 \cdot \exp(-0.693 \cdot t/T_{1/2-2})$ ). All T<sub>1/2</sub> values are biological half-times.

Estimated Radiation Doses:

| Target Organ              | mSv/MBq  | rem/mCi  |
|---------------------------|----------|----------|
| Adrenals                  | 7.93E-01 | 2.93E+00 |
| Brain                     | 5.50E-01 | 2.04E+00 |
| Breasts                   | 5.50E-01 | 2.04E+00 |
| Gallbladder Wall          | 8.10E-01 | 3.00E+00 |
| LLI Wall                  | 1.10E+00 | 4.06E+00 |
| Small Intestine           | 7.27E-01 | 2.69E+00 |
| Stomach Wall              | 7.16E-01 | 2.65E+00 |
| ULI Wall                  | 8.39E-01 | 3.11E+00 |
| Heart Wall                | 7.19E-01 | 2.66E+00 |
| Kidneys                   | 3.45E+00 | 1.28E+01 |
| Liver                     | 1.57E+00 | 5.83E+00 |
| Lungs                     | 1.74E+00 | 6.42E+00 |
| Muscle                    | 6.10E-01 | 2.26E+00 |
| Ovaries                   | 6.95E-01 | 2.57E+00 |
| Pancreas                  | 8.21E-01 | 3.04E+00 |
| Red Marrow                | 5.55E-01 | 2.05E+00 |
| Osteogenic Cells          | 1.23E+00 | 4.53E+00 |
| Skin                      | 5.08E-01 | 1.88E+00 |
| Spleen                    | 3.34E+00 | 1.23E+01 |
| Testes                    | 5.82E-01 | 2.15E+00 |
| Thymus                    | 6.44E-01 | 2.38E+00 |
| Thyroid                   | 6.18E-01 | 2.29E+00 |
| Urinary Bladder Wall      | 6.64E-01 | 2.46E+00 |
| Uterus                    | 6.92E-01 | 2.56E+00 |
| Total Body                | 6.87E-01 | 2.54E+00 |
|                           |          |          |
| Effective Dose Equivalent | 1.20E+00 | 4.46E+00 |
| Effective Dose            | 9.25E-01 | 3.42E+00 |

*Duke, Subject 302 (Male)*

Kinetic Data:

|                          | Total Body | Kidneys | Liver | Spleen | Lungs  | GI  | Blood |
|--------------------------|------------|---------|-------|--------|--------|-----|-------|
| Fraction 1               | 1.000      | 0.018   | 0.030 | 0.019  | 0.0068 | --- | 0.68  |
| T <sub>1/2</sub> -1 (hr) | 5065       | 71.4    | 6.1   | 0.1    | 3.73   |     | 3.7   |
| Fraction 2               |            |         | 0.037 | 0.0174 | 0.029  |     | 0.362 |
| T <sub>1/2</sub> -2 (hr) |            |         | 208   | 30     | ∞      |     | 133   |
| N (Bq-hr/Bq admin)       | 251        | 1.31    | 5.59  | 0.66   | 7.94   |     |       |

Estimated Radiation Doses:

| Target Organ              | mSv/MBq  | rem/mCi  |
|---------------------------|----------|----------|
| Adrenals                  | 7.47E-01 | 2.77E+00 |
| Brain                     | 6.18E-01 | 2.29E+00 |
| Breasts                   | 5.91E-01 | 2.19E+00 |
| Gallbladder Wall          | 7.60E-01 | 2.81E+00 |
| LLI Wall                  | 7.52E-01 | 2.78E+00 |
| Small Intestine           | 7.66E-01 | 2.83E+00 |
| Stomach Wall              | 7.31E-01 | 2.71E+00 |
| ULI Wall                  | 7.54E-01 | 2.79E+00 |
| Heart Wall                | 7.40E-01 | 2.74E+00 |
| Kidneys                   | 8.33E-01 | 3.08E+00 |
| Liver                     | 6.45E-01 | 2.39E+00 |
| Lungs                     | 1.22E+00 | 4.50E+00 |
| Muscle                    | 6.58E-01 | 2.44E+00 |
| Ovaries                   | 7.72E-01 | 2.86E+00 |
| Pancreas                  | 7.74E-01 | 2.86E+00 |
| Red Marrow                | 5.88E-01 | 2.18E+00 |
| Osteogenic Cells          | 1.35E+00 | 5.01E+00 |
| Skin                      | 5.59E-01 | 2.07E+00 |
| Spleen                    | 7.43E-01 | 2.75E+00 |
| Testes                    | 6.53E-01 | 2.42E+00 |
| Thymus                    | 6.95E-01 | 2.57E+00 |
| Thyroid                   | 6.88E-01 | 2.54E+00 |
| Urinary Bladder Wall      | 7.33E-01 | 2.71E+00 |
| Uterus                    | 7.73E-01 | 2.86E+00 |
| Total Body                | 6.87E-01 | 2.54E+00 |
|                           |          |          |
| Effective Dose Equivalent | 7.94E-01 | 2.94E+00 |
| Effective Dose            | 7.38E-01 | 2.73E+00 |

*Hope, Subject 401 (Female)*

Kinetic Data:

|                          | Total Body | Kidneys | Liver  | Spleen | Lungs  | GI    | Blood |
|--------------------------|------------|---------|--------|--------|--------|-------|-------|
| Fraction 1               | 1.0        | 0.0280  | 0.0433 | 0.0045 | 0.0183 | 4.20% | 0.711 |
| T <sub>1/2</sub> -1 (hr) | 4538       | 0.9273  | 3.873  | 21.45  | 2.095  |       | 2.3   |
| Fraction 2               |            | 0.0038  | 0.0507 | 0.0097 | 0.0165 |       | 0.289 |
| T <sub>1/2</sub> -2 (hr) |            | 2234    | ∞      | 1083   | ∞      |       | 169   |
| N (Bq-hr/Bq admin)       | 263.1      | 1.0     | 14.3   | 2.4    | 4.6    |       |       |

Estimated Radiation Doses:

| Target Organ              | mSv/MBq  | rem/mCi  |
|---------------------------|----------|----------|
| Adrenals                  | 7.52E-01 | 2.78E+00 |
| Brain                     | 5.91E-01 | 2.19E+00 |
| Breasts                   | 5.65E-01 | 2.09E+00 |
| Gallbladder Wall          | 7.95E-01 | 2.94E+00 |
| LLI Wall                  | 1.07E+00 | 3.95E+00 |
| Small Intestine           | 7.48E-01 | 2.77E+00 |
| Stomach Wall              | 7.19E-01 | 2.66E+00 |
| ULI Wall                  | 8.36E-01 | 3.09E+00 |
| Heart Wall                | 7.19E-01 | 2.66E+00 |
| Kidneys                   | 7.32E-01 | 2.71E+00 |
| Liver                     | 1.30E+00 | 4.82E+00 |
| Lungs                     | 8.20E-01 | 3.03E+00 |
| Muscle                    | 6.34E-01 | 2.35E+00 |
| Ovaries                   | 7.35E-01 | 2.72E+00 |
| Pancreas                  | 7.88E-01 | 2.92E+00 |
| Red Marrow                | 5.67E-01 | 2.10E+00 |
| Osteogenic Cells          | 1.30E+00 | 4.80E+00 |
| Skin                      | 5.37E-01 | 1.99E+00 |
| Spleen                    | 1.96E+00 | 7.24E+00 |
| Testes                    | 6.25E-01 | 2.31E+00 |
| Thymus                    | 6.63E-01 | 2.45E+00 |
| Thyroid                   | 6.57E-01 | 2.43E+00 |
| Urinary Bladder Wall      | 7.05E-01 | 2.61E+00 |
| Uterus                    | 7.35E-01 | 2.72E+00 |
| Total Body                | 6.78E-01 | 2.51E+00 |
|                           |          |          |
| Effective Dose Equivalent | 8.51E-01 | 3.15E+00 |
| Effective Dose            | 7.73E-01 | 2.86E+00 |

*Hope, Subject 402 (Male)*

Kinetic Data:

|                          | Total Body | Kidneys | Liver  | Spleen | Lungs  | GI   | Blood |
|--------------------------|------------|---------|--------|--------|--------|------|-------|
| Fraction 1               | 1.0        | 0.0302  | 0.0390 | 0.0069 | 0.0076 | ---- | 0.58  |
| T <sub>1/2</sub> -1 (hr) | 3651       | 0.2181  | 4.272  | 1.58   | 21.840 |      | 3.3   |
| Fraction 2               |            | 0.0061  | 0.0367 | 0.0085 | 0.0063 |      | 0.362 |
| T <sub>1/2</sub> -2 (hr) |            | 1542    |        | 3500   |        |      | 162   |
| N (Bq-hr/Bq admin)       | 263.2      | 1.5     | 8.9    | 2.3    | 2.0    |      |       |

Estimated Radiation Doses:

| Target Organ              | mSv/MBq  | rem/mCi  |
|---------------------------|----------|----------|
| Adrenals                  | 7.51E-01 | 2.78E+00 |
| Brain                     | 6.13E-01 | 2.27E+00 |
| Breasts                   | 5.76E-01 | 2.13E+00 |
| Gallbladder Wall          | 7.81E-01 | 2.89E+00 |
| LLI Wall                  | 7.48E-01 | 2.77E+00 |
| Small Intestine           | 7.65E-01 | 2.83E+00 |
| Stomach Wall              | 7.36E-01 | 2.72E+00 |
| ULI Wall                  | 7.55E-01 | 2.79E+00 |
| Heart Wall                | 7.20E-01 | 2.66E+00 |
| Kidneys                   | 9.29E-01 | 3.44E+00 |
| Liver                     | 8.90E-01 | 3.29E+00 |
| Lungs                     | 4.98E-01 | 1.84E+00 |
| Muscle                    | 6.52E-01 | 2.41E+00 |
| Ovaries                   | 7.68E-01 | 2.84E+00 |
| Pancreas                  | 7.92E-01 | 2.93E+00 |
| Red Marrow                | 5.81E-01 | 2.15E+00 |
| Osteogenic Cells          | 1.34E+00 | 4.96E+00 |
| Skin                      | 5.54E-01 | 2.05E+00 |
| Spleen                    | 1.89E+00 | 7.00E+00 |
| Testes                    | 6.48E-01 | 2.40E+00 |
| Thymus                    | 6.76E-01 | 2.50E+00 |
| Thyroid                   | 6.77E-01 | 2.51E+00 |
| Urinary Bladder Wall      | 7.38E-01 | 2.73E+00 |
| Uterus                    | 7.69E-01 | 2.84E+00 |
| Total Body                | 6.81E-01 | 2.52E+00 |
|                           |          |          |
| Effective Dose Equivalent | 7.85E-01 | 2.91E+00 |
| Effective Dose            | 6.88E-01 | 2.55E+00 |

**JHU, Subject 201 (Male)**

Kinetic Data:

|                          | Total Body | Kidneys | Liver  | Spleen | Lungs  | GI    | Blood |
|--------------------------|------------|---------|--------|--------|--------|-------|-------|
| Fraction 1               | 1.0        | 0.0     | 0.0197 | 0.0023 | 0.0158 | 7.00% | 0.66  |
| T <sub>1/2</sub> -1 (hr) | 2471       |         | 3.588  | 0.26   | 4.468  |       | 2.5   |
| Fraction 2               |            |         | 0.0655 | 0.0063 | 0.0178 |       | 0.5   |
| T <sub>1/2</sub> -2 (hr) |            |         | 1863   | 1935   | ∞      |       | 780   |
| N (Bq-hr/Bq admin)       | 257.0      |         | 16.6   | 1.6    | 5.0    |       |       |

Estimated Radiation Doses:

| Target Organ              | mSv/MBq  | rem/mCi  |
|---------------------------|----------|----------|
| Adrenals                  | 7.37E-01 | 2.73E+00 |
| Brain                     | 5.71E-01 | 2.11E+00 |
| Breasts                   | 5.49E-01 | 2.03E+00 |
| Gallbladder Wall          | 7.94E-01 | 2.94E+00 |
| LLI Wall                  | 1.30E+00 | 4.79E+00 |
| Small Intestine           | 7.50E-01 | 2.78E+00 |
| Stomach Wall              | 6.96E-01 | 2.57E+00 |
| ULI Wall                  | 9.13E-01 | 3.38E+00 |
| Heart Wall                | 7.01E-01 | 2.59E+00 |
| Kidneys                   | 6.94E-01 | 2.57E+00 |
| Liver                     | 1.48E+00 | 5.46E+00 |
| Lungs                     | 8.63E-01 | 3.19E+00 |
| Muscle                    | 6.15E-01 | 2.28E+00 |
| Ovaries                   | 7.21E-01 | 2.67E+00 |
| Pancreas                  | 7.63E-01 | 2.82E+00 |
| Red Marrow                | 5.52E-01 | 2.04E+00 |
| Osteogenic Cells          | 1.26E+00 | 4.65E+00 |
| Skin                      | 5.20E-01 | 1.92E+00 |
| Spleen                    | 1.39E+00 | 5.14E+00 |
| Testes                    | 6.05E-01 | 2.24E+00 |
| Thymus                    | 6.43E-01 | 2.38E+00 |
| Thyroid                   | 6.34E-01 | 2.35E+00 |
| Urinary Bladder Wall      | 7.07E-01 | 2.62E+00 |
| Uterus                    | 7.16E-01 | 2.65E+00 |
| Total Body                | 6.63E-01 | 2.45E+00 |
|                           |          |          |
| Effective Dose Equivalent | 8.41E-01 | 3.11E+00 |
| Effective Dose            | 7.78E-01 | 2.88E+00 |

**GTU, Subject 101 (Female)**

Kinetic Data:

|                          | Total Body | Kidneys | Liver  | Spleen | Lungs  | GI    | Blood |
|--------------------------|------------|---------|--------|--------|--------|-------|-------|
| Fraction 1               | 1.0        | 0.0125  | 0.0113 | 0.0101 | 0.0143 | 0.00% | 0.503 |
| T <sub>1/2</sub> -1 (hr) | 5935       | 0.0699  | 4.62   | 43.6   | 3.90   |       | 2.5   |
| Fraction 2               |            | 0.0062  | 0.0387 | 0.0057 | 0.0310 |       | 0.497 |
| T <sub>1/2</sub> -2 (hr) |            | 533     | 495    | ∞      | 3779   |       | 177   |
| N (Bq-hr/Bq admin)       | 265.7      | 1.3     | 7.8    | 2.1    | 8.2    |       |       |

Estimated Radiation Doses:

| Target Organ              | mSv/MBq  | rem/mCi  |
|---------------------------|----------|----------|
| Adrenals                  | 7.50E-01 | 2.78E+00 |
| Brain                     | 6.06E-01 | 2.24E+00 |
| Breasts                   | 5.83E-01 | 2.16E+00 |
| Gallbladder Wall          | 7.67E-01 | 2.84E+00 |
| LLI Wall                  | 7.38E-01 | 2.73E+00 |
| Small Intestine           | 7.55E-01 | 2.79E+00 |
| Stomach Wall              | 7.31E-01 | 2.71E+00 |
| ULI Wall                  | 7.44E-01 | 2.75E+00 |
| Heart Wall                | 7.35E-01 | 2.72E+00 |
| Kidneys                   | 8.23E-01 | 3.05E+00 |
| Liver                     | 8.14E-01 | 3.01E+00 |
| Lungs                     | 1.26E+00 | 4.65E+00 |
| Muscle                    | 6.49E-01 | 2.40E+00 |
| Ovaries                   | 7.58E-01 | 2.80E+00 |
| Pancreas                  | 7.86E-01 | 2.91E+00 |
| Red Marrow                | 5.80E-01 | 2.15E+00 |
| Osteogenic Cells          | 1.33E+00 | 4.92E+00 |
| Skin                      | 5.50E-01 | 2.03E+00 |
| Spleen                    | 1.75E+00 | 6.49E+00 |
| Testes                    | 6.40E-01 | 2.37E+00 |
| Thymus                    | 6.85E-01 | 2.53E+00 |
| Thyroid                   | 6.75E-01 | 2.50E+00 |
| Urinary Bladder Wall      | 7.20E-01 | 2.66E+00 |
| Uterus                    | 7.59E-01 | 2.81E+00 |
| Total Body                | 6.85E-01 | 2.53E+00 |
|                           |          |          |
| Effective Dose Equivalent | 8.54E-01 | 3.16E+00 |
| Effective Dose            | 7.67E-01 | 2.84E+00 |

**GTU, Subject 102 (Male)**

Kinetic Data:

|                          | Total Body | Kidneys | Liver  | Spleen | Lungs  | GI    | Blood |
|--------------------------|------------|---------|--------|--------|--------|-------|-------|
| Fraction 1               | 1.0        | 0.0177  | 0.0116 | 0.0023 | 0.0065 | 0.00% | 0.423 |
| T <sub>1/2</sub> -1 (hr) | 6967       | 0.758   | 9      | 2.72   | 0.206  |       | 3.1   |
| Fraction 2               |            | 0.0024  | 0.0434 | 0.0029 | 0.0069 |       | 0.577 |
| T <sub>1/2</sub> -2 (hr) |            | ∞       | 867    | ∞      | 1364   |       | 86.3  |
| N (Bq-hr/Bq admin)       | 263        | 0.7     | 10.0   | 0.8    | 1.7    |       |       |

Estimated Radiation Doses:

| Target Organ              | mSv/MBq  | rem/mCi  |
|---------------------------|----------|----------|
| Adrenals                  | 7.45E-01 | 2.76E+00 |
| Brain                     | 6.15E-01 | 2.28E+00 |
| Breasts                   | 5.77E-01 | 2.13E+00 |
| Gallbladder Wall          | 7.88E-01 | 2.91E+00 |
| LLI Wall                  | 7.50E-01 | 2.77E+00 |
| Small Intestine           | 7.66E-01 | 2.83E+00 |
| Stomach Wall              | 7.27E-01 | 2.69E+00 |
| ULI Wall                  | 7.56E-01 | 2.80E+00 |
| Heart Wall                | 7.21E-01 | 2.67E+00 |
| Kidneys                   | 5.78E-01 | 2.14E+00 |
| Liver                     | 9.70E-01 | 3.59E+00 |
| Lungs                     | 4.59E-01 | 1.70E+00 |
| Muscle                    | 6.53E-01 | 2.42E+00 |
| Ovaries                   | 7.70E-01 | 2.85E+00 |
| Pancreas                  | 7.75E-01 | 2.87E+00 |
| Red Marrow                | 5.81E-01 | 2.15E+00 |
| Osteogenic Cells          | 1.35E+00 | 4.98E+00 |
| Skin                      | 5.56E-01 | 2.06E+00 |
| Spleen                    | 8.30E-01 | 3.07E+00 |
| Testes                    | 6.51E-01 | 2.41E+00 |
| Thymus                    | 6.78E-01 | 2.51E+00 |
| Thyroid                   | 6.80E-01 | 2.52E+00 |
| Urinary Bladder Wall      | 7.58E-01 | 2.81E+00 |
| Uterus                    | 7.72E-01 | 2.86E+00 |
| Total Body                | 6.79E-01 | 2.51E+00 |
|                           |          |          |
| Effective Dose Equivalent | 7.13E-01 | 2.64E+00 |
| Effective Dose            | 6.60E-01 | 2.44E+00 |

**GTU, Subject 103(Male)**

Kinetic Data:

|                          | Total Body | Kidneys | Liver  | Spleen | Lungs  | GI    | Blood |
|--------------------------|------------|---------|--------|--------|--------|-------|-------|
| Fraction 1               | 1.0        | 0.0467  | 0.0621 | 0.0129 | 0.0181 | 0.00% | 0.469 |
| T <sub>1/2</sub> -1 (hr) | 2716       | 0.1617  | 0.160  | 0.16   | 0.158  |       | 1.9   |
| Fraction 2               |            | 0.0033  | 0.0514 | 0.0076 | 0.0118 |       | 0.531 |
| T <sub>1/2</sub> -2 (hr) |            | 99      | 669    | 171    | 1135   |       | 228   |
| N (Bq-hr/Bq admin)       | 229.8      | 0.32    | 11.1   | 1.0    | 2.8    |       |       |

Estimated Radiation Doses:

| Target Organ              | mSv/MBq  | rem/mCi  |
|---------------------------|----------|----------|
| Adrenals                  | 6.51E-01 | 2.41E+00 |
| Brain                     | 5.27E-01 | 1.95E+00 |
| Breasts                   | 4.99E-01 | 1.85E+00 |
| Gallbladder Wall          | 6.96E-01 | 2.58E+00 |
| LLI Wall                  | 6.42E-01 | 2.38E+00 |
| Small Intestine           | 6.59E-01 | 2.44E+00 |
| Stomach Wall              | 6.30E-01 | 2.33E+00 |
| ULI Wall                  | 6.52E-01 | 2.41E+00 |
| Heart Wall                | 6.29E-01 | 2.33E+00 |
| Kidneys                   | 3.90E-01 | 1.44E+00 |
| Liver                     | 1.03E+00 | 3.81E+00 |
| Lungs                     | 5.65E-01 | 2.09E+00 |
| Muscle                    | 5.62E-01 | 2.08E+00 |
| Ovaries                   | 6.60E-01 | 2.44E+00 |
| Pancreas                  | 6.78E-01 | 2.51E+00 |
| Red Marrow                | 5.02E-01 | 1.86E+00 |
| Osteogenic Cells          | 1.15E+00 | 4.27E+00 |
| Skin                      | 4.77E-01 | 1.77E+00 |
| Spleen                    | 9.28E-01 | 3.43E+00 |
| Testes                    | 5.57E-01 | 2.06E+00 |
| Thymus                    | 5.86E-01 | 2.17E+00 |
| Thyroid                   | 5.83E-01 | 2.16E+00 |
| Urinary Bladder Wall      | 6.53E-01 | 2.41E+00 |
| Uterus                    | 6.62E-01 | 2.45E+00 |
| Total Body                | 5.92E-01 | 2.19E+00 |
|                           |          |          |
| Effective Dose Equivalent | 6.60E-01 | 2.44E+00 |
| Effective Dose            | 5.99E-01 | 2.22E+00 |
