# Supplementary material for: A Phase 1 Study of 131I-CLR1404 in Patients with Relapsed or Refractory Advanced Solid Tumors: Dosimetry, Biodistribution, Pharmacokinetics, and Safety
Source: PubMed Central journal article supplement (PMC4234270; doi:10.1371/journal.pone.0111652), 2014-11-17
Supplement: pone.0111652.s004.pdf [file pone.0111652.s004.pdf]

**Appendix 16.4**  
**Collectar, Inc.**  
**Protocol No. DCL-08-001**  
**INDIVIDUAL PATIENT DATA LISTINGS**

Listing 1  
Inclusion Criteria

---

| Criteria Number | Criteria                                                                                                                                                                                                                                                                                                                                      |
|-----------------|-----------------------------------------------------------------------------------------------------------------------------------------------------------------------------------------------------------------------------------------------------------------------------------------------------------------------------------------------|
| 1               | Patient has relapsed or refractory advanced solid tumors and has exhausted standard treatment options or no standard therapy exists.                                                                                                                                                                                                          |
| 2               | Patient has a sufficient window of time to complete the washout period of 2 weeks (if patient has received standard therapy) or 4 weeks (if patient has received experimental therapy), dosimetry data acquisition (14 days), and the follow-up safety assessment period (4 weeks) prior to beginning another cycle of a therapeutic regimen. |
| 3               | Patient is ambulatory with an ECOG performance status of 0 or 1 and an estimated life expectancy of => 4 months.                                                                                                                                                                                                                              |
| 4               | Patient is 18 years or older.                                                                                                                                                                                                                                                                                                                 |
| 5               | Patient is judged by the Investigator to have the initiative and means to be compliant with the protocol and is within geographical proximity to make the required study visits.                                                                                                                                                              |
| 6               | Patient or his/her legal representatives have the ability to read, understand and provide written informed consent for the initiation of any study related procedures.                                                                                                                                                                        |
| 7               | Patient is of childbearing potential and has a negative serum pregnancy test within 24 hours of start of treatment.                                                                                                                                                                                                                           |
| 8               | Patient agrees to use an effective method of contraception (e.g., oral contraceptives, double-barrier methods such as a condom and a diaphragm, intrauterine device, Norplant, Depo-Provera) during the study and for 90 days following the infusion of study medication.                                                                     |
| 9               | Patient has brain metastasis and his/her clinical condition has been stable for at least one month.                                                                                                                                                                                                                                           |

---

Listing 1  
Inclusion Criteria

|         |         | Inclusion Criteria |     |     |     |     |     |    |     |    |
|---------|---------|--------------------|-----|-----|-----|-----|-----|----|-----|----|
| Center  | Patient | 1                  | 2   | 3   | 4   | 5   | 6   | 7  | 8   | 9  |
| XVO_001 | 101     | Yes                | Yes | Yes | Yes | Yes | Yes | NA | NA  | NA |
|         | 102     | Yes                | Yes | Yes | Yes | Yes | Yes | NA | Yes | NA |
|         | 103     | Yes                | Yes | Yes | Yes | Yes | Yes | NA | Yes | NA |
| XVO_003 | 201     | Yes                | Yes | Yes | Yes | Yes | Yes | NA | Yes | NA |
| XVO_005 | 301     | Yes                | Yes | Yes | Yes | Yes | Yes | NA | Yes | NA |
|         | 302     | Yes                | Yes | Yes | Yes | Yes | Yes | NA | Yes | NA |
| XVO_007 | 401     | Yes                | Yes | Yes | Yes | Yes | Yes | NA | NA  | NA |
|         | 402     | No                 | Yes | Yes | Yes | Yes | Yes | NA | Yes | NA |

Listing 2  
Exclusion Criteria

| Criteria Number | Criteria                                                                                                                                                                                |
|-----------------|-----------------------------------------------------------------------------------------------------------------------------------------------------------------------------------------|
| 1               | Patient or physician plans concomitant chemotherapy, therapeutic radiation treatment, and/or biological treatment for cancer including immunotherapy while on study.                    |
| 2               | Patient has had more than 25% of the total bone marrow irradiated.                                                                                                                      |
| 3               | Patient has diffuse lung disease or interstitial spread of carcinoma.                                                                                                                   |
| 4               | Patient's bladder or rectum is within a prior radiation therapy field and a dose of greater than 45 Gy was administered.                                                                |
| 5               | Patients with total therapeutic radiation dose in excess of 25 Gy to the kidney, 45 Gy to brain, 45 Gy to stomach, 18 Gy to lung, or 25 Gy to liver.                                    |
| 6               | Patient has received total-body irradiation in the past.                                                                                                                                |
| 7               | Patient has extradural tumor in contact with the spinal cord, or tumor(s) located where swelling in response to therapy may impinge upon the spinal cord.                               |
| 8               | Patient has received prior radiation therapy or chemotherapy within 2 weeks of the start of the study.                                                                                  |
| 9               | Patient has another active medical condition(s) or organ disease(s) that may either compromise his/her safety or interfere with the safety and/or outcome evaluation of the study drug. |
| 10a             | The Patient has WBC < 3000/uL.                                                                                                                                                          |
| 10b             | The Patient has absolute neutrophil count < 1500/uL.                                                                                                                                    |
| 10c             | The Patient has platelets < 150,000/uL.                                                                                                                                                 |
| 10d             | The Patient has hemoglobin <= 11.0 gm/dL.                                                                                                                                               |
| 10e             | The Patient has total bilirubin > 1.5 x upper limit of normal for age.                                                                                                                  |
| 10f             | The Patient has SGOT or SGPT > 3 x upper limit of normal for age if no liver metastases or > 5 x upper limit of normal for age in the presence of liver metastases.                     |
| 10g             | The Patient has serum creatinine > 1.5 x upper limit of normal for age.                                                                                                                 |
| 10h             | The Patient has INR => 2.                                                                                                                                                               |
| 11              | Patient has been treated with an investigational drug, investigational biologic, or investigational therapeutic device within 30 days of initiating study treatment.                    |
| 12              | Patient has received severely marrow toxic drugs (e.g. nitrosoureas, mitomycin).                                                                                                        |
| 13              | Patient has received prior treatment with Iodine-131 in the past five years.                                                                                                            |
| 14              | Patient is currently receiving hemodialysis.                                                                                                                                            |
| 15              | Patient has received blood transfusion (s) within 60 days of study start.                                                                                                               |
| 16              | Patient has received growth factor therapy within 60 days of study start.                                                                                                               |
| 17              | Patient has received prior stem cell transplantation.                                                                                                                                   |
| 18              | Patient has clinically evident ascites or peritoneal carcinomatosis.                                                                                                                    |

Note: The original text of criteria 5 - Patient has received therapeutic radiation dose in the past year in excess of 25 Gy to the kidney, 45 Gy to brain, 45 Gy to stomach, 18 Gy to lung, or 25 Gy to liver - was presented on the CRF.

Note: Blank = Not Done.

Listing 2  
Exclusion Criteria

| Criteria Number | Criteria                                                                                                                                                                                                                                                                                                         |
|-----------------|------------------------------------------------------------------------------------------------------------------------------------------------------------------------------------------------------------------------------------------------------------------------------------------------------------------|
| 19              | Patient has clinically significant cardiac co-morbidities including: congestive heart failure (New York Heart Association class III-IV heart disease), a LVEF < 40%, unstable angina pectoris, serious cardiac arrhythmia requiring medication or a pacemaker, myocardial infarction within the past six months. |
| 20              | Patient has clinically significant pulmonary impairment defined as a SaO <sub>2</sub> on room air of 93% or less.                                                                                                                                                                                                |
| 21              | Patient is currently or has recently (within 1 month) been treated with thrombolytic agents, or full-dose anticoagulants (except to maintain patency of preexisting, permanent indwelling IV catheters). Of note, therapy with low-molecular weight heparin is acceptable as long as the INR < 2.0.              |
| 22              | Patient has uncontrolled hypertension as defined by SBP > 150 mmHg, DBP > 100 mmHg or patient has uncontrolled diabetes that would compromise his/her safety or interfere with the safety and/or outcome evaluation of the study drug.                                                                           |
| 23              | Patient has Grade II-IV peripheral vascular disease or has had peripheral vascular surgery within the past year.                                                                                                                                                                                                 |
| 24              | Patient has had major surgery within 4 weeks of the start of the study.                                                                                                                                                                                                                                          |
| 25              | Patient is known positive for HIV, Hepatitis C (active, previously treated or both), or is Hepatitis B core antigen positive.                                                                                                                                                                                    |
| 26              | Patient is currently taking more than 325 mg/day of aspirin.                                                                                                                                                                                                                                                     |
| 27              | Patient is pregnant or lactating.                                                                                                                                                                                                                                                                                |
| 28              | Patient has a colostomy/ileostomy.                                                                                                                                                                                                                                                                               |
| 29              | Patient has poor venous access and will be unable to receive study drug into a peripheral venous catheter.                                                                                                                                                                                                       |
| 30              | Patient has had prior allergic reactions to iodine, or other study agents.                                                                                                                                                                                                                                       |
| 31              | Patient has had a significant traumatic injury within the past 4 weeks.                                                                                                                                                                                                                                          |
| 32              | Patient has an ongoing or active infection requiring antibiotics or with a fever > 38.1°C (>101° F) within 3 days of the first scheduled day of dosing.                                                                                                                                                          |
| 33              | Patient is hospitalized.                                                                                                                                                                                                                                                                                         |

Note: The original text of criteria 5 - Patient has received therapeutic radiation dose in the past year in excess of 25 Gy to the kidney, 45 Gy to brain, 45 Gy to stomach, 18 Gy to lung, or 25 Gy to liver - was presented on the CRF.

Note: Blank = Not Done.

Listing 2  
 Exclusion Criteria

|         |         | Exclusion Criteria |    |    |    |    |    |    |    |    |     |     |     |     |     |     |     |     |    |    |    |    |
|---------|---------|--------------------|----|----|----|----|----|----|----|----|-----|-----|-----|-----|-----|-----|-----|-----|----|----|----|----|
| Center  | Patient | 1                  | 2  | 3  | 4  | 5  | 6  | 7  | 8  | 9  | 10a | 10b | 10c | 10d | 10e | 10f | 10g | 10h | 11 | 12 | 13 | 14 |
| XVO_001 | 101     | No                 | No | No | No | No | No | No | No | No | No  | No  | No  | No  | No  | No  | No  |     | No | No | No | No |
|         | 102     | No                 | No | No | No | No | No | No | No | No | No  | No  | No  | No  | No  | No  | No  | No  | No | No | No | No |
|         | 103     | No                 | No | No | No | No | No | No | No | No | No  | No  | No  | No  | No  | No  | No  | No  | No | No | No | No |
| XVO_003 | 201     | No                 | No | No | No | No | No | No | No | No | No  | No  | No  | No  | No  | No  | No  |     | No | No | No | No |
| XVO_005 | 301     | No                 | No | No | No | No | No | No | No | No | No  | No  | No  | No  | No  | No  | No  |     | No | No | No | No |
|         | 302     | No                 | No | No | No | No | No | No | No | No | No  | No  | No  | No  | No  | No  | No  | No  | No | No | No | No |
| XVO_007 | 401     | No                 | No | No | No | No | No | No | No | No | No  | No  | No  | No  | No  | No  | No  | No  | No | No | No | No |
|         | 402     | No                 | No | No | No | No | No | No | No | No | No  | No  | No  | No  | No  | No  | No  | No  | No | No | No | No |

Note: The original text of criteria 5 - Patient has received therapeutic radiation dose in the past year in excess of 25 Gy to the kidney, 45 Gy to brain, 45 Gy to stomach, 18 Gy to lung, or 25 Gy to liver - was presented on the CRF.  
 Note: Blank = Not Done.

Listing 2  
 Exclusion Criteria

|         |         | Exclusion Criteria |    |    |    |    |    |    |    |    |    |    |    |    |    |    |     |    |    |    |
|---------|---------|--------------------|----|----|----|----|----|----|----|----|----|----|----|----|----|----|-----|----|----|----|
| Center  | Patient | 15                 | 16 | 17 | 18 | 19 | 20 | 21 | 22 | 23 | 24 | 25 | 26 | 27 | 28 | 29 | 30  | 31 | 32 | 33 |
| XVO_001 | 101     | No                 | No | No | No | No | No | No | No | No | No | No | No | NA | No | No | No  | No | No | No |
|         | 102     | No                 | No | No | No | No | No | No | No | No | No | No | No | NA | No | No | No  | No | No | No |
|         | 103     | No                 | No | No | No | No | No | No | No | No | No | No | No | NA | No | No | No  | No | No | No |
| XVO_003 | 201     | No                 | No | No | No | No | No | No | No | No | No | No | No | NA | No | No | No  | No | No | No |
| XVO_005 | 301     | No                 | No | No | No | No | No | No | No | No | No | No | No | NA | No | No | No  | No | No | No |
|         | 302     | No                 | No | No | No | No | No | No | No | No | No | No | No | NA | No | No | No  | No | No | No |
| XVO_007 | 401     | No                 | No | No | No | No | No | No | No | No | No | No | No | NA | No | No | Yes | No | No | No |
|         | 402     | No                 | No | No | No | No | No | No | No | No | No | No | No | NA | No | No | No  | No | No | No |

Note: The original text of criteria 5 - Patient has received therapeutic radiation dose in the past year in excess of 25 Gy to the kidney, 45 Gy to brain, 45 Gy to stomach, 18 Gy to lung, or 25 Gy to liver - was presented on the CRF.  
 Note: Blank = Not Done.

Listing 3  
Informed Consent and Eligibility Criteria Exemption

| Center  | Patient | Informed Consent Date | All Study Entry Criteria Met? | If no, specify                                                                                                                                                                                          | Protocol Exception Date | Sponsor Representative |
|---------|---------|-----------------------|-------------------------------|---------------------------------------------------------------------------------------------------------------------------------------------------------------------------------------------------------|-------------------------|------------------------|
| XVO_001 | 101     | 09NOV2009             | No                            | INR MEASUREMENT WAS NOT OBTAINED IN SCREENING PROCESS. THIS IS A PROTOCOL VIOLATION - NO EXCEPTION WAS GRANTED.                                                                                         |                         |                        |
|         | 102     | 11DEC2009             | Yes                           |                                                                                                                                                                                                         |                         |                        |
|         | 103     | 11JAN2010             | Yes                           |                                                                                                                                                                                                         |                         |                        |
| XVO_003 | 201     | 10NOV2009             | No                            | INR NOT OBTAINED PER PROTOCOL AT SCREENING                                                                                                                                                              |                         |                        |
| XVO_005 | 301     | 03AUG2009             | No                            | INR LAB WAS NOT DRAWN AS PART OF THE SCREENING PROCEDURES ON 03/AUG/2009                                                                                                                                | 04AUG2009               | ERNEST ALLEN           |
|         | 302     | 16NOV2009             | Yes                           |                                                                                                                                                                                                         |                         |                        |
| XVO_007 | 401     | 20OCT2009             | No                            | PER EXCL CRITERIA#30 THE PT. MEDT HIS INDICATED THAT SHE IS ALLERGIC TO IODINE WHICH IS ACTUALLY AN ALLERGY TO CT CONTRAST MEDIA. SPONSOR AND FDA CONTACTED FOR WAIVER TO ENROLL PT WITH PREMEDICATION. | 09NOV2009               | ERNEST ALLEN           |
|         | 402     | 20NOV2009             | No                            | THE PT HAS DENOVO METASTATIC PROSTATE CANCER & IS ON HIS 1ST LINE OF THERAPY WITH CASODEX& LUPRON.THERE ARE NO SAFETY CONCERNS ENROLLING THE PT ON THE DOSIMETRY CLINICAL TRIAL PER THE SPONSOR MM      | 30NOV2009               | ROBERT SHEPARD.M.D     |



Listing 4  
Demographics

| Center  | Patient | Date of Birth | Age<br>(Years) | Gender | Ethnicity          | Race                      |
|---------|---------|---------------|----------------|--------|--------------------|---------------------------|
| XVO_001 | 101     | 15JAN1938     | 71             | Female |                    | White                     |
|         | 102     | 18SEP1963     | 46             | Male   |                    | Black or African American |
|         | 103     | 31JUL1951     | 58             | Male   |                    | White                     |
| XVO_003 | 201     | 20AUG1940     | 69             | Male   |                    | White                     |
| XVO_005 | 301     | 16FEB1955     | 54             | Male   |                    | White                     |
|         | 302     | 16MAR1943     | 66             | Male   |                    | White                     |
| XVO_007 | 401     | 05MAY1949     | 60             | Female | Hispanic or Latino |                           |
|         | 402     | 02NOV1957     | 52             | Male   |                    | White                     |

Listing 5  
Medical / Surgical History

| Center                         | Patient                   | Diagnosis/Condition/Surgery         | Diagnosis/<br>Surgery Date | Ongoing  | CTCAE Grade [a] | Comments |                                        |
|--------------------------------|---------------------------|-------------------------------------|----------------------------|----------|-----------------|----------|----------------------------------------|
| XVO_001                        | 101                       | ANXIETY                             | UNKNOWN                    | Yes      | 1               |          |                                        |
|                                |                           | ATELECTASIS                         | --NOV2008                  |          |                 |          |                                        |
|                                |                           | CELLULITIS                          | --NOV2008                  |          |                 |          |                                        |
|                                |                           | EPISTAXIS                           | UNKNOWN                    | Yes      | 1               |          |                                        |
|                                |                           | HYPERTENSION                        | UNKNOWN                    | Yes      | 2               |          |                                        |
|                                |                           | KLEBSIELLA PNEUMONIA                | --NOV2008                  |          |                 |          |                                        |
|                                |                           | MASS LOWERPOLE RIGHT KIDNEY         | 27FEB2009                  | Yes      | 1               |          |                                        |
|                                |                           | MILD DARKNESS IN DIP/PIP JOINTS     | UNKNOWN                    |          |                 |          | -RESOLVED DOCUMENTED ON<br>09-NOV-2009 |
|                                |                           | OVARIAN CYST REMOVAL                | ----2008                   |          |                 |          |                                        |
|                                |                           | PAIN BILAT KNEES FALL ON RIGHT KNEE | ----2008                   | Yes      | 1               |          |                                        |
|                                |                           | PULMONARY EMBOLUS                   | ----2008                   |          |                 |          |                                        |
|                                |                           | THYROID ABLATION                    | UNKNOWN                    |          |                 |          |                                        |
|                                |                           | UTI                                 | --NOV2008                  |          |                 |          |                                        |
|                                |                           | 102                                 | EPISTAXIS                  | ----2009 | Yes             | 1        |                                        |
|                                | HYPERTENSION              |                                     | UNKNOWN                    | Yes      | 1               |          |                                        |
|                                | ACNEIFORM RASH: THORAX    |                                     | UNKNOWN                    | Yes      | 1               |          |                                        |
|                                | ANOREXIA POST CHEMO       |                                     | ----2009                   |          |                 |          |                                        |
|                                | DRY COUGH                 |                                     | ----2009                   |          |                 |          |                                        |
|                                | DYSGEUSIA POST CHEMO      |                                     | ----2009                   |          |                 |          |                                        |
|                                | FATIGUE POST CHEMO        |                                     | ----2009                   |          |                 |          |                                        |
|                                | HYPERCHOLESTEROLEMIA      |                                     | ----2008                   | Yes      | 1               |          |                                        |
|                                | HYPO-THYROIDISM           |                                     | ----1997                   | Yes      | 1               |          |                                        |
|                                | INTERMITTENT CONSTIPATION | UNKNOWN                             | Yes                        | 1        |                 |          |                                        |
| MILD RIGHT KNEE PAIN           | UNKNOWN                   | Yes                                 | 1                          |          |                 |          |                                        |
| MYOCARDIAL INFARCTION INF WALL | UNKNOWN                   |                                     |                            |          |                 |          |                                        |

Note: [a] Only recorded if ongoing.  
-- =Date unknown or partially unknown.

Listing 5  
 Medical / Surgical History

| Center                 | Patient                       | Diagnosis/Condition/Surgery                        | Diagnosis/<br>Surgery Date | Ongoing                                                         | CTCAE Grade [a]    | Comments              |
|------------------------|-------------------------------|----------------------------------------------------|----------------------------|-----------------------------------------------------------------|--------------------|-----------------------|
| XVO_001                | 102                           | OBESITY                                            | UNKNOWN                    | Yes                                                             | 4                  |                       |
|                        |                               | PARONYCHIA GREAT TOE NAIL                          | ----2009                   | Yes                                                             | 2                  |                       |
|                        |                               | PARONYCHIA HANDS                                   | ----2009                   |                                                                 |                    |                       |
|                        |                               | PELVIC ABSCESS                                     | ----2007                   |                                                                 |                    | SURGERY               |
|                        |                               | PROLONGED QT INTERVAL                              | UNKNOWN                    | Yes                                                             | 1                  |                       |
|                        |                               | RASH ON FACE, ARM, BACK                            | UNKNOWN                    | Yes                                                             | 1                  |                       |
|                        |                               | RECTAL BLEEDING                                    | ----2006                   |                                                                 |                    | COLONOSCOPY PERFORMED |
|                        |                               | RT CALF DISCOMFORT                                 | ----2008                   | Yes                                                             | 1                  |                       |
|                        | 103                           | SEVERE SENSORY NEUROPATHY SECONDARY TO OXALIPLATIN | ----2007                   |                                                                 |                    |                       |
|                        |                               | SKIN DISCOLORATION BILATERAL FEET                  | ----2008                   |                                                                 |                    |                       |
|                        |                               | HYPERTENSION                                       | ----2004                   | Yes                                                             | 1                  |                       |
|                        |                               | PULMONARY EMBOLUS                                  | 15AUG2007                  |                                                                 |                    |                       |
|                        |                               | ANASTOMOSIS IN RECTUM                              | 13JUL2009                  |                                                                 |                    |                       |
|                        |                               | BACK STIFFNESS (MILD)                              | UNKNOWN                    | Yes                                                             | 1                  |                       |
| XVO_003                | 201                           | DIVERTICULOSIS                                     | 13JUL2009                  |                                                                 |                    |                       |
|                        |                               | MACULAR DEGENERATION                               | ----2009                   | Yes                                                             | 1                  |                       |
|                        |                               | MEDIPORT PLACEMENT                                 | ----2007                   | Yes                                                             |                    |                       |
|                        |                               | MILD FATIGUE                                       | UNKNOWN                    | Yes                                                             | 1                  |                       |
|                        | PRIMARY HYPERCOAGULABLE STATE | UNKNOWN                                            | Yes                        | 1                                                               |                    |                       |
|                        | R INGUINAL HERNIORRHAPHY      | ----1999                                           |                            |                                                                 |                    |                       |
|                        | ATRIAL FIBRILLATION POST-OP   | 25OCT2005                                          |                            |                                                                 | RESOLVED JULY 2006 |                       |
|                        | BENIGN PROSTATIC HYPERTROPHY  | ----2004                                           | Yes                        | 2                                                               | ON MEDICAL THERAPY |                       |
| CHRONIC EMPHYSEMA/COPD | UNKNOWN                       | Yes                                                | 1                          | PATIENT NOTED THIS MENTIONED ON PRIOR CT; NO OXYGEN REQUIREMENT |                    |                       |
|                        | CHRONIC RHINITIS              | 16JUN2008                                          | Yes                        | 1                                                               |                    |                       |
| CLAUDICATION           | 16JUN2008                     | Yes                                                | 1                          |                                                                 |                    |                       |

Note: [a] Only recorded if ongoing.  
 -- =Date unknown or partially unknown.

Listing 5  
Medical / Surgical History

| Center          | Patient   | Diagnosis/Condition/Surgery                                          | Diagnosis/<br>Surgery Date | Ongoing | CTCAE Grade [a] | Comments                               |                                             |
|-----------------|-----------|----------------------------------------------------------------------|----------------------------|---------|-----------------|----------------------------------------|---------------------------------------------|
| XVO_003         | 201       | COLON BIOPSY                                                         | ----2002                   |         |                 | BENIGN                                 |                                             |
|                 |           | COLON POLYPS/COLONOSCOPY                                             | ----2002                   |         |                 | BENIGN                                 |                                             |
|                 |           | COUGH WITH CLEAR SPUTUM                                              | 16JUN2008                  |         |                 |                                        |                                             |
|                 |           | DIARRHEA                                                             | ----2005                   | Yes     | 1               | INTERMITTENT LOOSE STOOLS 1-2 PER WEEK |                                             |
|                 |           | DIZZINESS                                                            | ----2005                   |         |                 |                                        |                                             |
|                 |           | DYSPHAGIA                                                            | ----2005                   |         |                 |                                        |                                             |
|                 |           | DYSPNEA DURING CHEMOTHERAPY                                          | 16JUN2008                  |         |                 |                                        |                                             |
|                 |           | ELEVATED GGT                                                         | 10NOV2009                  | Yes     | 1               |                                        |                                             |
|                 |           | EMPYEMA                                                              | --NOV2005                  |         |                 |                                        | POST-OP                                     |
|                 |           | ESOPHAGOSCOPY WITH DILATATION                                        | 18MAY2006                  |         |                 |                                        | LAST OF SERIES OF DILATATION ON 06MAY2008   |
|                 |           | FATIGUE DURING CHEMOTHERAPY                                          | 21MAY2009                  |         |                 |                                        |                                             |
|                 |           | HEMORRHOIDS                                                          | 16JUN2008                  | Yes     | 1               |                                        |                                             |
|                 |           | HOARSENESS                                                           | ----2005                   | Yes     | 1               |                                        |                                             |
|                 |           | HYPERLIPIDEMIA                                                       | UNKNOWN                    | Yes     | 1               |                                        | IMPROVED AFTER CHEMOTHERAPY AND WEIGHT LOSS |
|                 |           | JEJUNOSTOMY TUBE REPLACEMENT                                         | 10APR2006                  |         |                 |                                        |                                             |
|                 |           | LEFT HIP FRACTURE                                                    | --SEP2008                  |         |                 |                                        | HEALED                                      |
|                 |           | LOW BACK PAIN                                                        | 27AUG2009                  | Yes     | 2               |                                        |                                             |
|                 |           | METHICILLIN-RESISTANT STAPHYLOCOCCUS AUREUS INFECTION POST-OPERATIVE | --APR2006                  |         |                 |                                        |                                             |
|                 |           | NEUROPATHY                                                           | 21MAY2009                  | Yes     | 1               |                                        |                                             |
|                 |           | ORTHOSTATIC HYPOTENSION                                              | 25SEP2005                  | Yes     | 1               |                                        |                                             |
|                 |           | OSTEOPENIA                                                           | 14MAY2009                  | Yes     | 1               |                                        |                                             |
|                 |           | OSTEOPOROSIS                                                         |                            |         |                 |                                        |                                             |
|                 |           | POST-OPERATIVE COMPLICATIONS                                         | ----2005                   |         |                 |                                        | ANASTOMOTIC LEAK AND STRICTURE              |
| PROSTATE BIOPSY | ----2004  |                                                                      |                            |         | BENIGN          |                                        |                                             |
| SPONDYLOSIS     | 14MAY2009 | Yes                                                                  | 1                          |         |                 |                                        |                                             |

Note: [a] Only recorded if ongoing.  
-- =Date unknown or partially unknown.

Listing 5  
Medical / Surgical History

| Center             | Patient   | Diagnosis/Condition/Surgery                   | Diagnosis/<br>Surgery Date | Ongoing              | CTCAE Grade [a] | Comments                                          |
|--------------------|-----------|-----------------------------------------------|----------------------------|----------------------|-----------------|---------------------------------------------------|
| XVO_003            | 201       | URINARY FREQUENCY                             | ----2004                   | Yes                  | 1               | NOT TREATED                                       |
|                    |           | VASCULAR ATHEROSCLEROSIS                      | UNKNOWN                    | Yes                  | 1               |                                                   |
| XVO_005            | 301       | OBESITY                                       | UNKNOWN                    | Yes                  | 3               | CONTROL BY MEDICATION<br>NOT PRESENT AT SCREENING |
|                    |           | NEUROPATHY                                    | UNKNOWN                    | Yes                  | 1               |                                                   |
|                    |           | COUGH                                         | --JUL2006                  | Yes                  | 1               |                                                   |
|                    |           | DIABETES                                      | UNKNOWN                    | Yes                  | 2               |                                                   |
|                    |           | ESOPHAGITIS                                   | 12DEC2006                  |                      |                 |                                                   |
|                    |           | GASTROESOPHAGEAL REFLUX                       | UNKNOWN                    | Yes                  | 2               |                                                   |
|                    |           | HIGH BLOOD PRESSURE                           | UNKNOWN                    | Yes                  | 2               |                                                   |
|                    |           | HIGH CHOLESTEROL                              | 02APR2009                  | Yes                  | 1               |                                                   |
|                    |           | IDIOPATHIC HIVES                              | ----2005                   |                      |                 |                                                   |
|                    |           | LEFT WEDGE RESECTION OF LUNG<br>(LINGULAR)    | 17NOV2006                  |                      |                 |                                                   |
|                    |           | NASAL DRAINAGE                                | 03AUG2009                  | Yes                  | 1               |                                                   |
|                    |           | PHLEGM PRODUCTION                             | 13MAR2007                  | Yes                  | 2               |                                                   |
|                    |           | RIGHT HEMICOLECTOMY                           | 08NOV2004                  |                      |                 |                                                   |
|                    |           | RIGHT UPPER EXTREMITY DEEP VEIN<br>THROMBOSIS | 13FEB2007                  |                      |                 |                                                   |
|                    |           | SCIATICA PAIN                                 | UNKNOWN                    | Yes                  | 2               |                                                   |
|                    |           | SHORTNESS OF BREATH                           | 17NOV2006                  | Yes                  | 1               |                                                   |
|                    |           | UMBILICAL HERNIA                              | --NOV2004                  |                      |                 |                                                   |
|                    |           | VENTRAL HERNIA                                | UNKNOWN                    | Yes                  | 2               |                                                   |
|                    |           | WHEEZING                                      | --MAY2009                  | Yes                  | 1               |                                                   |
|                    |           | 302                                           |                            | HYPERCHOLESTEROLEMIA | 22SEP2008       |                                                   |
| ANKLE FRACTURE     | ----2003  |                                               |                            |                      |                 |                                                   |
| BACK PAIN          | ----2005  |                                               |                            | Yes                  | 1               |                                                   |
| LEFT ANKLE SURGERY | 31MAR2003 |                                               |                            |                      |                 |                                                   |

Note: [a] Only recorded if ongoing.  
-- =Date unknown or partially unknown.

Listing 5  
 Medical / Surgical History

| Center  | Patient              | Diagnosis/Condition/Surgery    | Diagnosis/<br>Surgery Date | Ongoing | CTCAE Grade [a] | Comments |
|---------|----------------------|--------------------------------|----------------------------|---------|-----------------|----------|
| XVO_005 | 302                  | SENSORY NEUROPATHY (LEFT HEEL) | 13JUL2009                  | Yes     | 1               |          |
|         |                      | SKULL FRACTURE                 | ----1991                   |         |                 |          |
|         |                      | URINARY OBSTRUCTION            | 14DEC2009                  | Yes     | 2               |          |
|         |                      | VERTEBRAE FRACTURE             | ----2005                   |         |                 |          |
| XVO_007 | 401                  | HYPERTENSION                   | UNKNOWN                    |         |                 |          |
|         |                      | HYPERCHOLESTEROLEMIA           | UNKNOWN                    | Yes     | 1               |          |
|         |                      | OBESITY                        | UNKNOWN                    | Yes     | 4               |          |
|         |                      | DEPRESSION                     | ----2008                   |         |                 |          |
|         | 402                  | CONSTIPATION                   | UNKNOWN                    | Yes     | 1               |          |
|         |                      | FREQUENT URINATION             | UNKNOWN                    | Yes     | 1               |          |
|         |                      | HERNIA REPAIR                  | ----1992                   |         |                 |          |
|         |                      | JOINT PAIN (HIP AND BACK)      | UNKNOWN                    | Yes     | 1               |          |
|         | URINARY INCONTINENCE | UNKNOWN                        | Yes                        | 2       |                 |          |

Note: [a] Only recorded if ongoing.  
 -- =Date unknown or partially unknown.

Listing 6.1  
Past Treatment For Cancer: Radiation Therapy

| Center  | Patient | Start Date | Stop Date | Site(s)                         | Dose (Gy) |
|---------|---------|------------|-----------|---------------------------------|-----------|
| XVO_003 | 201     | 03AUG2005  | 07SEP2005 | DISTAL ESOPHAGUS                | 45        |
| XVO_005 | 301     | 12DEC2006  | 10JAN2007 | LEFT LUNG, T4-T8 VERTEBRAL BODY | 40        |

SAS program path: U:\Project Folders - UK\Collectar\XVO08001\Statistics\SASProgs\l6\_1.sas TThampy

08APR2010 9:05

Listing 6.2  
Past Treatment For Cancer: Radiation Therapy - Cumulative Non-Target Exposure

---

| Center  | Patient | Median Dose (Gy) to |        |         |       |         |       |       |
|---------|---------|---------------------|--------|---------|-------|---------|-------|-------|
|         |         | Bladder             | Rectum | Kidneys | Brain | Stomach | Lungs | Liver |
| XVO_003 | 201     | 0                   | 0      | 0       | 0     | 0       | 7.6   | 12.7  |
| XVO_005 | 301     |                     |        |         |       | 0.6     | 2     |       |

---



Listing 6.3  
Past Treatment For Cancer: Surgery

| Center  | Patient | Date      | Surgery                                      |
|---------|---------|-----------|----------------------------------------------|
| XVO_001 | 101     | 18NOV2008 | HEMICOLECTOMY                                |
|         |         | 18NOV2008 | OVARIAN CYST REMOVAL                         |
|         |         | 18NOV2008 | UMBILICAL TUMOR RESECTION                    |
|         | 102     | --FEB2007 | PARTIAL SIGMOID RESECTION                    |
|         | 103     | 18SEP2007 | SIGMOID COLECTOMY WITH LYMPH NODE DISSECTION |
|         |         | 18SEP2007 | SIGMOIDOSCOPY                                |
| XVO_003 | 201     | 25OCT2005 | TRANSHIATAL ESOPHAGECTOMY                    |
| XVO_005 | 301     | 20APR2009 | LEFT LOWER LOBECTOMY                         |
|         |         | 17NOV2006 | LEFT WEDGE RESECTION OF LUNG (LINGULAR)      |
|         |         | 08NOV2004 | RIGHT HEMICOLECTOMY                          |

-- =Date unknown or partially unknown

Listing 6.4  
 Past Treatment For Cancer: Chemotherapy

| Center  | Patient | Start Date | Stop Date | Treatment/Regimen                                         |
|---------|---------|------------|-----------|-----------------------------------------------------------|
| XVO_001 | 101     | 09JAN2009  | 09JUN2009 | FOLFOX 8 CYCLES                                           |
|         | 102     | --FEB2007  | --APR2007 | FOLFOX + OXALIPATIN                                       |
|         |         | --APR2007  | -----2007 | FOLFOX + AVASTIN                                          |
|         |         | -----2007  | --FEB2008 | 5-FU + LEUCOVARIN + AVASTIN                               |
|         |         | --FEB2008  | --APR2008 | XELODA + AVASTIN                                          |
|         |         | --JUL2009  | 13NOV2009 | IRINOTECAN + AVASTIN + ERBITUX                            |
|         |         | 18JUN2008  | --JUL2009 | ERBITUX + IRINOTECAN + RAD                                |
|         | 103     | 13NOV2007  | 19FEB2008 | FOLFIRI, AVASTIN, ERBITUX                                 |
|         |         | 04MAR2008  | --DEC2008 | XELODA                                                    |
| XVO_003 | 201     | 01AUG2005  | 29AUG2005 | TAXOL AND CISPLATIN (CONCOMMITANT WITH RADIATION THERAPY) |
|         |         | 19JUN2008  | 02SEP2008 | CISPLATIN AND IRINOTECAN                                  |
|         |         | 04DEC2008  | 14MAY2009 | IRINOTECAN                                                |
| XVO_005 | 301     | 12DEC2006  | 12JAN2007 | XELODA                                                    |
|         |         | 20DEC2004  | --JUN2005 | FOLFOX (LEUCOVORIN/5-FU/OXALIPLATIN)                      |

-- =Date unknown or partially unknown

Listing 6.4  
Past Treatment For Cancer: Chemotherapy

| Center  | Patient | Start Date | Stop Date | Treatment/Regimen |
|---------|---------|------------|-----------|-------------------|
| XVO_005 | 301     | 13MAR2007  | 15MAY2007 | XELODA            |
|         |         | 20FEB2007  | 10MAR2009 | AVASTIN           |
|         |         | 13MAR2007  | 15MAY2007 | IRINOTECAN HCL    |
|         |         | 22MAY2007  | 06FEB2008 | FLUOROURACIL      |
|         | 302     | 24JUL2008  | 16NOV2009 | ZOMETA            |
|         |         | 16FEB2009  | 24AUG2009 | DOCETAXEL         |

-- =Date unknown or partially unknown

Listing 6.5  
Past Treatment For Cancer: Hormonal, Immunological, Biological and Other Therapy

| Center  | Patient | Start Date                          | Stop Date              | Treatment/Regimen                                         |
|---------|---------|-------------------------------------|------------------------|-----------------------------------------------------------|
| XVO_001 | 101     | 09JAN2009                           | 21APR2009              | AVASTIN 7 CYCLES                                          |
| XVO_005 | 301     | 17JUN2008<br>--SEP2008              | 26AUG2008<br>--OCT2008 | AVX701 (INVESTIGATIONAL TREATMENT)<br>INTERFERON ALPHA 2B |
|         | 302     | 08AUG2007<br>01AUG2007<br>21AUG2008 | --FEB2008<br>19DEC2008 | ELIGARD<br>CASODEX<br>LEUPROLIDE ACETATE (CONTINUING)     |
| XVO_007 | 401     | 15FEB2008                           |                        | ANASTROZOLE, FASLODEX (ONGOING)                           |
|         | 402     | 06NOV2009<br>06NOV2009              |                        | CASODEX (ONGOING)<br>LUPRON (ONGOING)                     |

-- =Date unknown or partially unknown

Listing 7  
 Primary Tumor

| Center  | Patient | Primary Solid Tumor | Histological Type                        | Method of Diagnosis | Date of First Diagnosis | Metastatic Disease | Current Cancer Stage | Sites of Metastasis                      |
|---------|---------|---------------------|------------------------------------------|---------------------|-------------------------|--------------------|----------------------|------------------------------------------|
| XVO_001 | 101     | COLON               | ADENO CARCINOMA                          | HISTOLOGICAL        | 19DEC2008               | YES                | IV                   | Ovary, Abdominal wall, Other (UMBILICUS) |
|         | 102     | COLON               | UNK                                      | HISTOLOGICAL        | --DEC2006               | YES                | IV T3 N1 M1          | Lymph node, Kidney, Liver, Lung          |
|         | 103     | COLON               | ADENOCARCINOMA                           | HISTOLOGICAL        | -----2007               | YES                | XT1N2MX              | Lymph node                               |
| XVO_003 | 201     | ESOPHAGEAL          | MODERATELY DIFFERENTIATED ADENOCARCINOMA | HISTOLOGICAL        | 05JUL2005               | YES                | T4                   | Lymph node, Liver, Lung                  |
| XVO_005 | 301     | COLON               | ADENOCARCINOMA                           | HISTOLOGICAL        | 12NOV2004               | YES                | 4                    | Lung                                     |
|         | 302     | PROSTATIC           | ADENOCARCINOMA                           | HISTOLOGICAL        | 08AUG2007               | YES                | 4                    | Bone                                     |
| XVO_007 | 401     | LEFT BREAST CANCER  | LOBULAR CARCINOMA                        | HISTOLOGICAL        | 15JAN2008               | YES                | IV                   | Spleen                                   |
|         | 402     | PROSTATE CANCER     | ADENOCARCINOMA                           | HISTOLOGICAL        | 01JUL2009               | YES                | IV                   | Lung, Bone                               |

-- =Date unknown or partially unknown  
 UNK = Unknown

Listing 8  
 I-131-CLR1401 Dosing Details

| Center  | Patient | Pre infusion Syringe |                 | Total Residual Activity |                 | Total Injected Dose |                        |                       | Dose<br>Delivered As<br>Per Protocol | Reason |
|---------|---------|----------------------|-----------------|-------------------------|-----------------|---------------------|------------------------|-----------------------|--------------------------------------|--------|
|         |         | Activity<br>(mCi)    | Time<br>Assayed | Activity<br>(mCi)       | Time<br>Assayed | Activity<br>(mCi)   | Infusion<br>Start Time | Infusion<br>Stop Time |                                      |        |
| XVO_001 | 101     | 10.7                 | 13:35           | 0.4                     | 15:28           | 10.3                | 15:14                  | 15:24                 | Yes                                  |        |
|         | 102     | 10.2                 | 12:40           | 0.1                     | 12:56           | 10.1                | 12:45                  | 12:55                 | Yes                                  |        |
|         | 103     | 10.6                 | 12:45           | 0.2                     | 13:03           | 10.4                | 12:51                  | 13:01                 | Yes                                  |        |
| XVO_003 | 201     | 9.6                  | 12:59           | 0.2                     | 13:34           | 9.4                 | 13:15                  | 13:25                 | Yes                                  |        |
| XVO_005 | 301     | 10.0                 | 11:20           | 0.1                     | 16:26           | 9.9                 | 12:09                  | 12:20                 | Yes                                  |        |
|         | 302     | 10.3                 | 10:45           | 0.1                     | 13:48           | 10.2                | 12:03                  | 12:13                 | Yes                                  |        |
| XVO_007 | 401     | 10.2                 | 11:09           | 0.1                     | 13:55           | 10.1                | 12:25                  | 12:36                 | Yes                                  |        |
|         | 402     | 11.1                 | 10:46           | 0.1                     | 13:04           | 11.0                | 12:24                  | 12:34                 | Yes                                  |        |

Listing 9  
Adverse Events

| Center  | Patient | AE No [a] | System Organ Class / Preferred Term / Investigator Text                                     | Dates of Onset/ Resolution | CTCAE Grade | Frequency [b] | Action Taken   |           |     | Outcome [e] | Relationship [f] |
|---------|---------|-----------|---------------------------------------------------------------------------------------------|----------------------------|-------------|---------------|----------------|-----------|-----|-------------|------------------|
|         |         |           |                                                                                             |                            |             |               | Study Drug [c] | Other [d] | SAE |             |                  |
| XVO_001 | 101     | 1 *       | GENERAL DISORDERS AND ADMINISTRATION / SITE CONDITIONS / FATIGUE / FATIGUE                  | 16NOV2009 / 11DEC2009      | 1           | 2             | 1              | 1         | No  | 1           | 1                |
|         | 102     | 1 *       | GENERAL DISORDERS AND ADMINISTRATION / SITE CONDITIONS / FATIGUE / FATIGUE                  | 29DEC2009 / CONT           | 1           | 2             | 1              | 1         | No  | 5           | 1                |
|         |         | 2 *       | GASTROINTESTINAL DISORDERS / CONSTIPATION / CONSTIPATION                                    | 29DEC2009 / CONT           | 1           | 1             | 1              | 5         | No  | 5           | 1                |
| XVO_003 | 201     | 1 *       | INFECTIONS AND INFESTATIONS / SIALOADENITIS / MILD BILATERAL SUBMANDIBULAR GLAND TENDERNESS | 19NOV2009 / 22DEC2009      | 1           | 1             | 1              | 1         | No  | 1           | 1                |
|         |         | 2 *       | GASTROINTESTINAL DISORDERS / DIARRHOEA / DIAHRRHEA                                          | 17NOV2009 / CONT           | 1           | 1             | 1              | 6         | No  | 5           | 2                |

Note: [a] \* Indicates the AE is treatment emergent.  
 [b] Frequency: 1=Intermittent 2=Continuous 3=Single Episode  
 [c] Action Taken, Study Drug: 1=None 2=Dosing stopped permanently due to AE 3=Dosing interrupted  
 [d] Action Taken, Other: 1=None 2=Procedure or physical therapy 3=Blood or blood products 4=Withdrawn from study due to AE  
 5=Prescription drug therapy 6=Non-prescription drug therapy 7=Hospitalization 8=IV fluids given 9=Other  
 [e] Outcome: 1=Resolved 2=resolved with sequelae 3=Death 4=Unknown/lost to follow-up 5=AE persisting 6=AE persisting with change in grade  
 [f] Relationship to Study Drug: 1=Related 2=Not related

Listing 9  
Adverse Events

| Center  | Patient | AE No [a] | System Organ Class / Preferred Term / Investigator Text                                   | Dates of Onset/ Resolution | CTCAE Grade | Frequency [b] | Action Taken   |           |     |   | Outcome [e] | Relationship [f] |
|---------|---------|-----------|-------------------------------------------------------------------------------------------|----------------------------|-------------|---------------|----------------|-----------|-----|---|-------------|------------------|
|         |         |           |                                                                                           |                            |             |               | Study Drug [c] | Other [d] | SAE |   |             |                  |
| XVO_003 | 201     | 3 *       | MUSCULOSKELETAL AND CONNECTIVE TISSUE DISORDERS/<br>BACK PAIN/<br>LOW BACK PAIN           | 24NOV2009/<br>CONT         | 2           | 1             | 1              | 6         | No  | 5 | 2           |                  |
|         |         | 4 *       | INVESTIGATIONS/<br>BLOOD PRESSURE DECREASED/<br>DECREASE IN BP                            | 17NOV2009/<br>17NOV2009    | 1           | 1             | 1              | 1         | No  | 1 | 2           |                  |
|         |         | 5 *       | SKIN AND SUBCUTANEOUS TISSUE DISORDER S/<br>SKIN ULCER/<br>LEFT ELBOW ULCERATION          | 21NOV2009/<br>02DEC2009    | 1           | 3             | 1              | 1         | No  | 1 | 2           |                  |
|         |         | 6 *       | SKIN AND SUBCUTANEOUS TISSUE DISORDER S/<br>SKIN ULCER/<br>RIGHT ELBOW ULCERATION         | 02DEC2009/<br>22DEC2009    | 1           | 3             | 1              | 1         | No  | 1 | 2           |                  |
|         |         | 7 *       | RESPIRATORY, THORACIC AND MEDIASTINAL DISORDERS/<br>NASAL CONGESTION/<br>NASAL CONGESTION | 23NOV2009/<br>24NOV2009    | 1           | 2             | 1              | 6         | No  | 1 | 2           |                  |

Note: [a] \* Indicates the AE is treatment emergent.  
 [b] Frequency: 1=Intermittent 2=Continuous 3=Single Episode  
 [c] Action Taken, Study Drug: 1=None 2=Dosing stopped permanently due to AE 3=Dosing interrupted  
 [d] Action Taken, Other: 1=None 2=Procedure or physical therapy 3=Blood or blood products 4=Withdrawn from study due to AE  
 5=Prescription drug therapy 6=Non-prescription drug therapy 7=Hospitalization 8=IV fluids given 99=Other  
 [e] Outcome: 1=Resolved 2=resolved with sequelae 3=Death 4=Unknown/lost to follow-up 5=AE persisting 6=AE persisting with change in grade  
 [f] Relationship to Study Drug: 1=Related 2=Not related



Listing 9  
Adverse Events

| Center  | Patient | AE No [a] | System Organ Class / Preferred Term / Investigator Text                         | Dates of Onset/ Resolution | CTCAE Grade | Frequency [b] | Action Taken   |           |     |   | Outcome [e] | Relationship [f] |
|---------|---------|-----------|---------------------------------------------------------------------------------|----------------------------|-------------|---------------|----------------|-----------|-----|---|-------------|------------------|
|         |         |           |                                                                                 |                            |             |               | Study Drug [c] | Other [d] | SAE |   |             |                  |
| XVO_003 | 201     | 8 *       | INVESTIGATIONS/<br>GAMMA-GLUTAMYLTRANSFERASE INCREASED/<br>ELEVATED GGT         | 23NOV2009/<br>02DEC2009    | 2           | 3             | 1              | 1         | No  | 1 | 2           |                  |
| XVO_005 | 301     | 1 *       | GENERAL DISORDERS AND ADMINISTRATION<br>SITE CONDITIONS/<br>FATIGUE/<br>FATIGUE | 06AUG2009/<br>08SEP2009    | 1           | 2             | 1              | 1         | No  | 1 | 2           |                  |
|         |         | 2 *       | RESPIRATORY, THORACIC AND MEDIASTINAL<br>DISORDERS/<br>WHEEZING/<br>WHEEZING    | 15SEP2009/<br>22DEC2009    | 1           | 2             | 1              | 1         | No  | 1 | 2           |                  |
|         | 302     | 1 *       | GENERAL DISORDERS AND ADMINISTRATION<br>SITE CONDITIONS/<br>FATIGUE/<br>FATIGUE | 16DEC2009/<br>25JAN2010    | 1           | 2             | 1              | 1         | No  | 1 | 1           |                  |
|         |         | 2 *       | INFECTIONS AND INFESTATIONS/<br>HORDEOLUM/<br>STYE RIGHT LOWER EYELID           | 18DEC2009/<br>14JAN2010    | 1           | 2             | 1              | 1         | No  | 1 | 2           |                  |

Note: [a] \* Indicates the AE is treatment emergent.  
[b] Frequency: 1=Intermittent 2=Continuous 3=Single Episode  
[c] Action Taken, Study Drug: 1=None 2=Dosing stopped permanently due to AE 3=Dosing interrupted  
[d] Action Taken, Other: 1=None 2=Procedure or physical therapy 3=Blood or blood products 4=Withdrawn from study due to AE  
5=Prescription drug therapy 6=Non-prescription drug therapy 7=Hospitalization 8=IV fluids given 9=Other  
[e] Outcome: 1=Resolved 2=resolved with sequelae 3=Death 4=Unknown/lost to follow-up 5=AE persisting 6=AE persisting with change in grade  
[f] Relationship to Study Drug: 1=Related 2=Not related

Listing 9  
Adverse Events

| Center  | Patient | AE No [a] | System Organ Class / Preferred Term / Investigator Text                                       | Dates of Onset/ Resolution | CTCAE Grade | Frequency [b] | Action Taken   |           |     | Outcome [e] | Relationship [f] |
|---------|---------|-----------|-----------------------------------------------------------------------------------------------|----------------------------|-------------|---------------|----------------|-----------|-----|-------------|------------------|
|         |         |           |                                                                                               |                            |             |               | Study Drug [c] | Other [d] | SAE |             |                  |
| XVO_007 | 401     | 1 *       | SKIN AND SUBCUTANEOUS TISSUE DISORDER S/ ERYTHEMA/ ERTHEMATOUS CHEST                          | 08DEC2009/ 22DEC2009       | 1           | 3             | 1              | 1         | No  | 1           | 2                |
|         | 402     | 1 *       | GENERAL DISORDERS AND ADMINISTRATION SITE CONDITIONS/ OEDEMA PERIPHERAL/ PRETIBIAL EDEMA-LEFT | 09JAN2010/ 02FEB2010       | 1           | 3             | 1              | 1         | No  | 1           | 2                |
|         |         | 2 *       | SKIN AND SUBCUTANEOUS TISSUE DISORDER S/ ERYTHEMA/ ERYTHEMA LEFT LEG                          | 09JAN2010/ 02FEB2010       | 1           | 3             | 1              | 1         | No  | 1           | 2                |
|         |         | 3 *       | INFECTIONS AND INFESTATIONS/ ERYSIPELAS/ SUPERFICIAL CELLULITIS LEFT LEG                      | 09JAN2010/ 02FEB2010       | 1           | 3             | 1              | 5         | No  | 1           | 2                |

Note: [a] \* Indicates the AE is treatment emergent.  
 [b] Frequency: 1=Intermittent 2=Continuous 3=Single Episode  
 [c] Action Taken, Study Drug: 1=None 2=Dosing stopped permanently due to AE 3=Dosing interrupted  
 [d] Action Taken, Other: 1=None 2=Procedure or physical therapy 3=Blood or blood products 4=Withdrawn from study due to AE  
 5=Prescription drug therapy 6=Non-prescription drug therapy 7=Hospitalization 8=IV fluids given 99=Other  
 [e] Outcome: 1=Resolved 2=resolved with sequelae 3=Death 4=Unknown/lost to follow-up 5=AE persisting 6=AE persisting with change in grade  
 [f] Relationship to Study Drug: 1=Related 2=Not related

Listing 10.1  
 Laboratory Data: Chemistry

| Center          | Patient | Visit         | Assessment Date | Parameter            | Recorded Result | Recorded Units | Converted Result | Converted Units |
|-----------------|---------|---------------|-----------------|----------------------|-----------------|----------------|------------------|-----------------|
| XVO_001         | 101     | Screening     | 09NOV2009       | ALBUMIN              | 3.9             | G/DL           | 3900             | MG/DL           |
|                 |         |               |                 | ALKALINE PHOSPHATASE | 63              | IU/L           | 63               | U/L             |
|                 |         |               |                 | ALT (SGPT)           | 19              | IU/L           | 19               | U/L             |
|                 |         |               |                 | AST (SGOT)           | 23              | IU/L           | 23               | U/L             |
|                 |         |               |                 | BICARBONATE          | 26              | MMOL/L         | 26               | MEQ/L           |
|                 |         |               |                 | BUN                  | 13              | MG/DL          | 13               | MG/DL           |
|                 |         |               |                 | CALCIUM              | 9.3             | MG/DL          | 9.3              | MG/DL           |
|                 |         |               |                 | CHLORIDE             | 103             | MMOL/L         | 103              | MEQ/L           |
|                 |         |               |                 | CREATININE           | 0.60            | MG/DL          | 0.60             | MG/DL           |
|                 |         |               |                 | GGT                  | 11              | IU/L           | 11               | U/L             |
|                 |         |               |                 | GLUCOSE              | 86              | MG/DL          | 86               | MG/DL           |
|                 |         |               |                 | POTASSIUM            | 3.9             | MMOL/L         | 3.9              | MEQ/L           |
|                 |         |               |                 | SODIUM               | 137             | MMOL/L         | 137              | MEQ/L           |
|                 |         |               |                 | TOTAL BILIRUBIN      | 0.8             | MG/DL          | 0.8              | MG/DL           |
|                 |         | TOTAL PROTEIN | 7.0             | GM/DL                | 7.0             | G/DL           |                  |                 |
|                 |         | Day 6         | 16NOV2009       | ALBUMIN              | 3.8             | G/DL           | 3800             | MG/DL           |
|                 |         |               |                 | ALKALINE PHOSPHATASE | 58              | IU/L           | 58               | U/L             |
|                 |         |               |                 | ALT (SGPT)           | 17              | U/L            | 17               | U/L             |
|                 |         |               |                 | AST (SGOT)           | 23              | IU/L           | 23               | U/L             |
|                 |         |               |                 | BICARBONATE          | 25              | MMOL/L         | 25               | MEQ/L           |
| BUN             | 10      |               |                 | MG/DL                | 10              | MG/DL          |                  |                 |
| CALCIUM         | 9.3     |               |                 | MG/DL                | 9.3             | MG/DL          |                  |                 |
| CHLORIDE        | 103     |               |                 | MMOL/L               | 103             | MEQ/L          |                  |                 |
| CREATININE      | 0.70    |               |                 | MG/DL                | 0.70            | MG/DL          |                  |                 |
| GGT             | 8       |               |                 | IU/L                 | 8               | U/L            |                  |                 |
| GLUCOSE         | 100     |               |                 | MG/DL                | 100             | MG/DL          |                  |                 |
| POTASSIUM       | 4.2     |               |                 | MMOL/L               | 4.2             | MEQ/L          |                  |                 |
| SODIUM          | 133     |               |                 | MMOL/L               | 133             | MEQ/L          |                  |                 |
| TOTAL BILIRUBIN | 0.7     |               |                 | MG/DL                | 0.7             | MG/DL          |                  |                 |
| TOTAL PROTEIN   | 6.8     |               |                 | GM/DL                | 6.8             | G/DL           |                  |                 |

Listing 10.1  
 Laboratory Data: Chemistry

| Center          | Patient | Visit         | Assessment Date | Parameter            | Recorded Result | Recorded Units | Converted Result | Converted Units |
|-----------------|---------|---------------|-----------------|----------------------|-----------------|----------------|------------------|-----------------|
| XVO_001         | 101     | Day 14        | 24NOV2009       | ALBUMIN              | 3.7             | G/DL           | 3700             | MG/DL           |
|                 |         |               |                 | ALKALINE PHOSPHATASE | 60              | IU/L           | 60               | U/L             |
|                 |         |               |                 | ALT (SGPT)           | 17              | U/L            | 17               | U/L             |
|                 |         |               |                 | AST (SGOT)           | 21              | IU/L           | 21               | U/L             |
|                 |         |               |                 | BICARBONATE          | 28              | MMOL/L         | 28               | MEQ/L           |
|                 |         |               |                 | BUN                  | 14              | MG/DL          | 14               | MG/DL           |
|                 |         |               |                 | CALCIUM              | 9.5             | MG/DL          | 9.5              | MG/DL           |
|                 |         |               |                 | CHLORIDE             | 106             | MMOL/L         | 106              | MEQ/L           |
|                 |         |               |                 | CREATININE           | 0.60            | MG/DL          | 0.60             | MG/DL           |
|                 |         |               |                 | GGT                  | 12              | IU/L           | 12               | U/L             |
|                 |         |               |                 | GLUCOSE              | 93              | MG/DL          | 93               | MG/DL           |
|                 |         |               |                 | POTASSIUM            | 4.4             | MMOL/L         | 4.4              | MEQ/L           |
|                 |         |               |                 | SODIUM               | 141             | MMOL/L         | 141              | MEQ/L           |
|                 |         |               |                 | TOTAL BILIRUBIN      | 0.5             | MG/DL          | 0.5              | MG/DL           |
|                 |         | TOTAL PROTEIN | 6.6             | GM/DL                | 6.6             | G/DL           |                  |                 |
|                 |         | Day 30        | 11DEC2009       | ALBUMIN              | 3.8             | G/DL           | 3800             | MG/DL           |
|                 |         |               |                 | ALKALINE PHOSPHATASE | 62              | IU/L           | 62               | U/L             |
|                 |         |               |                 | ALT (SGPT)           | 15              | U/L            | 15               | U/L             |
|                 |         |               |                 | AST (SGOT)           | 19              | IU/L           | 19               | U/L             |
|                 |         |               |                 | BICARBONATE          | 25              | MMOL/L         | 25               | MEQ/L           |
|                 |         |               |                 | BUN                  | 14              | MG/DL          | 14               | MG/DL           |
|                 |         |               |                 | CALCIUM              | 9.2             | MG/DL          | 9.2              | MG/DL           |
|                 |         |               |                 | CHLORIDE             | 102             | MMOL/L         | 102              | MEQ/L           |
|                 |         |               |                 | CREATININE           | 0.60            | MG/DL          | 0.60             | MG/DL           |
| GGT             | 12      |               |                 | IU/L                 | 12              | U/L            |                  |                 |
| GLUCOSE         | 91      | MG/DL         | 91              | MG/DL                |                 |                |                  |                 |
| POTASSIUM       | 4.10    | MMOL/L        | 4.10            | MEQ/L                |                 |                |                  |                 |
| SODIUM          | 135     | MMOL/L        | 135             | MEQ/L                |                 |                |                  |                 |
| TOTAL BILIRUBIN | 0.7     | MG/DL         | 0.7             | MG/DL                |                 |                |                  |                 |
| TOTAL PROTEIN   | 6.50    | GM/DL         | 6.50            | G/DL                 |                 |                |                  |                 |

Listing 10.1  
 Laboratory Data: Chemistry

| Center          | Patient        | Visit     | Assessment Date | Parameter            | Recorded Result | Recorded Units | Converted Result | Converted Units |
|-----------------|----------------|-----------|-----------------|----------------------|-----------------|----------------|------------------|-----------------|
| XVO_001         | 101            | Day 42    | 05JAN2010       | ALBUMIN              | 4.1             | G/DL           | 4100             | MG/DL           |
|                 |                |           |                 | ALKALINE PHOSPHATASE | 69              | IU/L           | 69               | U/L             |
|                 |                |           |                 | ALT (SGPT)           | 21              | U/L            | 21               | U/L             |
|                 |                |           |                 | AST (SGOT)           | 24              | IU/L           | 24               | U/L             |
|                 |                |           |                 | BICARBONATE          | 26              | MMOL/L         | 26               | MEQ/L           |
|                 |                |           |                 | BUN                  | 12              | MG/DL          | 12               | MG/DL           |
|                 |                |           |                 | CALCIUM              | 9.4             | MG/DL          | 9.4              | MG/DL           |
|                 |                |           |                 | CHLORIDE             | 104             | MMOL/L         | 104              | MEQ/L           |
|                 |                |           |                 | CREATININE           | .60             | MG/DL          | .60              | MG/DL           |
|                 |                |           |                 | GLUCOSE              | 99              | MG/DL          | 99               | MG/DL           |
|                 |                |           |                 | POTASSIUM            | 3.9             | MMOL/L         | 3.9              | MEQ/L           |
|                 |                |           |                 | SODIUM               | 136             | MMOL/L         | 136              | MEQ/L           |
|                 |                |           |                 | TOTAL BILIRUBIN      | 0.8             | MG/DL          | 0.8              | MG/DL           |
|                 | TOTAL PROTEIN  | 7.2       | GM/DL           | 7.2                  | G/DL            |                |                  |                 |
|                 | 102            | Screening | 11DEC2009       | ALBUMIN              | 3.5             | G/DL           | 3500             | MG/DL           |
|                 |                |           |                 | ALKALINE PHOSPHATASE | 76              | U/L            | 76               | U/L             |
|                 |                |           |                 | ALT (SGPT)           | 27              | IU/L           | 27               | U/L             |
|                 |                |           |                 | AST (SGOT)           | 28              | IU/L           | 28               | U/L             |
|                 |                |           |                 | BICARBONATE          | 28              | MMOL/L         | 28               | MEQ/L           |
|                 |                |           |                 | BUN                  | 5               | MG/DL          | 5                | MG/DL           |
|                 |                |           |                 | CALCIUM              | 9.3             | MG/DL          | 9.3              | MG/DL           |
|                 |                |           |                 | CHLORIDE             | 105             | MMOL/L         | 105              | MEQ/L           |
|                 |                |           |                 | CREATININE           | .90             | MG/DL          | .90              | MG/DL           |
| GGT             |                |           |                 | 63                   | IU/L            | 63             | U/L              |                 |
| GLUCOSE         |                |           |                 | 81                   | MG/DL           | 81             | MG/DL            |                 |
| POTASSIUM       |                |           |                 | 3.9                  | MMOL/L          | 3.9            | MEQ/L            |                 |
| SODIUM          |                |           |                 | 140                  | MMOL/L          | 140            | MEQ/L            |                 |
| TOTAL BILIRUBIN | 0.8            | MG/DL     | 0.8             | MG/DL                |                 |                |                  |                 |
| TOTAL PROTEIN   | 6.2            | GM/DL     | 6.2             | G/DL                 |                 |                |                  |                 |
|                 | Day 0 Pre-dose | 15DEC2009 | ALBUMIN         | 3.5                  | G/DL            | 3500           | MG/DL            |                 |

Listing 10.1  
 Laboratory Data: Chemistry

| Center  | Patient | Visit           | Assessment Date | Parameter            | Recorded Result | Recorded Units | Converted Result | Converted Units |
|---------|---------|-----------------|-----------------|----------------------|-----------------|----------------|------------------|-----------------|
| XVO_001 | 102     | Day 0 Pre-dose  | 15DEC2009       | ALKALINE PHOSPHATASE | 76              | IU/L           | 76               | U/L             |
|         |         |                 |                 | ALT (SGPT)           | 22              | U/L            | 22               | U/L             |
|         |         |                 |                 | AST (SGOT)           | 27              | IU/L           | 27               | U/L             |
|         |         |                 |                 | BICARBONATE          | 27              | MMOL/L         | 27               | MEQ/L           |
|         |         |                 |                 | BUN                  | 7               | MG/DL          | 7                | MG/DL           |
|         |         |                 |                 | CALCIUM              | 9.0             | MG/DL          | 9.0              | MG/DL           |
|         |         |                 |                 | CHLORIDE             | 103             | MMOL/L         | 103              | MEQ/L           |
|         |         |                 |                 | CREATININE           | 1.00            | MG/DL          | 1.00             | MG/DL           |
|         |         |                 |                 | GGT                  | 51              | IU/L           | 51               | U/L             |
|         |         |                 |                 | GLUCOSE              | 109             | MG/DL          | 109              | MG/DL           |
|         |         |                 |                 | POTASSIUM            | 3.4             | MMOL/L         | 3.4              | MEQ/L           |
|         |         |                 |                 | SODIUM               | 139             | MMOL/L         | 139              | MEQ/L           |
|         |         |                 |                 | TOTAL BILIRUBIN      | 0.9             | MG/DL          | 0.9              | MG/DL           |
|         |         | TOTAL PROTEIN   | 6.1             | GM/DL                | 6.1             | G/DL           |                  |                 |
|         |         | Day 6           | 21DEC2009       | ALBUMIN              | 3.5             | G/DL           | 3500             | MG/DL           |
|         |         |                 |                 | ALKALINE PHOSPHATASE | 58              | IU/L           | 58               | U/L             |
|         |         |                 |                 | ALT (SGPT)           | 20              | U/L            | 20               | U/L             |
|         |         |                 |                 | AST (SGOT)           | 32              | IU/L           | 32               | U/L             |
|         |         |                 |                 | BICARBONATE          | 30              | MMOL/L         | 30               | MEQ/L           |
|         |         |                 |                 | BUN                  | 5               | MG/DL          | 5                | MG/DL           |
|         |         |                 |                 | CALCIUM              | 8.9             | MG/DL          | 8.9              | MG/DL           |
|         |         |                 |                 | CHLORIDE             | 103             | MMOL/L         | 103              | MEQ/L           |
|         |         |                 |                 | CREATININE           | 1.10            | MG/DL          | 1.10             | MG/DL           |
|         |         |                 |                 | GGT                  | 43              | IU/L           | 43               | U/L             |
|         |         |                 |                 | GLUCOSE              | 105             | MG/DL          | 105              | MG/DL           |
|         |         |                 |                 | POTASSIUM            | 3.5             | MMOL/L         | 3.5              | MEQ/L           |
|         |         |                 |                 | SODIUM               | 140             | MMOL/L         | 140              | MEQ/L           |
|         |         | TOTAL BILIRUBIN | 0.8             | MG/DL                | 0.8             | MG/DL          |                  |                 |
|         |         | TOTAL PROTEIN   | 6.5             | GM/DL                | 6.5             | G/DL           |                  |                 |
|         |         | Day 14          | 29DEC2009       | ALBUMIN              | 3.3             | G/DL           | 3300             | MG/DL           |

Listing 10.1  
 Laboratory Data: Chemistry

| Center  | Patient | Visit  | Assessment Date | Parameter            | Recorded Result | Recorded Units | Converted Result | Converted Units |
|---------|---------|--------|-----------------|----------------------|-----------------|----------------|------------------|-----------------|
| XVO_001 | 102     | Day 14 | 29DEC2009       | ALKALINE PHOSPHATASE | 61              | IU/L           | 61               | U/L             |
|         |         |        |                 | ALT (SGPT)           | 17              | U/L            | 17               | U/L             |
|         |         |        |                 | AST (SGOT)           | 28              | IU/L           | 28               | U/L             |
|         |         |        |                 | BICARBONATE          | 30              | MMOL/L         | 30               | MEQ/L           |
|         |         |        |                 | BUN                  | 5               | MG/DL          | 5                | MG/DL           |
|         |         |        |                 | CALCIUM              | 8.7             | MG/DL          | 8.7              | MG/DL           |
|         |         |        |                 | CHLORIDE             | 101             | MMOL/L         | 101              | MEQ/L           |
|         |         |        |                 | CREATININE           | 1.0             | MG/DL          | 1.0              | MG/DL           |
|         |         |        |                 | GGT                  | 34              | IU/L           | 34               | U/L             |
|         |         |        |                 | GLUCOSE              | 85              | MG/DL          | 85               | MG/DL           |
|         |         |        |                 | POTASSIUM            | 3.8             | MMOL/L         | 3.8              | MEQ/L           |
|         |         |        |                 | SODIUM               | 138             | MMOL/L         | 138              | MEQ/L           |
|         |         |        |                 | TOTAL BILIRUBIN      | 0.6             | MG/DL          | 0.6              | MG/DL           |
|         |         |        |                 | TOTAL PROTEIN        | 6.2             | GM/DL          | 6.2              | G/DL            |
|         |         | Day 30 | 15JAN2010       | ALBUMIN              | 3.5             | G/DL           | 3500             | MG/DL           |
|         |         |        |                 | ALKALINE PHOSPHATASE | 62              | IU/L           | 62               | U/L             |
|         |         |        |                 | ALT (SGPT)           | 15              | U/L            | 15               | U/L             |
|         |         |        |                 | AST (SGOT)           | 21              | IU/L           | 21               | U/L             |
|         |         |        |                 | BICARBONATE          | 29              | MMOL/L         | 29               | MEQ/L           |
|         |         |        |                 | BUN                  | 5               | MG/DL          | 5                | MG/DL           |
|         |         |        |                 | CALCIUM              | 8.9             | MG/DL          | 8.9              | MG/DL           |
|         |         |        |                 | CHLORIDE             | 102             | MMOL/L         | 102              | MEQ/L           |
|         |         |        |                 | CREATININE           | 1.10            | MG/DL          | 1.10             | MG/DL           |
|         |         |        |                 | GGT                  | 32              | IU/L           | 32               | U/L             |
|         |         |        |                 | GLUCOSE              | 98              | MG/DL          | 98               | MG/DL           |
|         |         |        |                 | POTASSIUM            | 3.9             | MMOL/L         | 3.9              | MEQ/L           |
|         |         |        |                 | SODIUM               | 138             | MMOL/L         | 138              | MEQ/L           |
|         |         |        |                 | TOTAL BILIRUBIN      | 0.7             | MG/DL          | 0.7              | MG/DL           |
|         |         |        |                 | TOTAL PROTEIN        | 6.5             | GM/DL          | 6.5              | G/DL            |
|         |         | Day 42 | 29JAN2010       | ALBUMIN              | 3.7             | G/DL           | 3700             | MG/DL           |

Listing 10.1  
 Laboratory Data: Chemistry

| Center          | Patient        | Visit     | Assessment Date | Parameter            | Recorded Result | Recorded Units | Converted Result | Converted Units |
|-----------------|----------------|-----------|-----------------|----------------------|-----------------|----------------|------------------|-----------------|
| XVO_001         | 102            | Day 42    | 29JAN2010       | ALKALINE PHOSPHATASE | 68              | IU/L           | 68               | U/L             |
|                 |                |           |                 | ALT (SGPT)           | 17              | U/L            | 17               | U/L             |
|                 |                |           |                 | AST (SGOT)           | 23              | IU/L           | 23               | U/L             |
|                 |                |           |                 | BICARBONATE          | 29              | MMOL/L         | 29               | MEQ/L           |
|                 |                |           |                 | BUN                  | 7               | MG/DL          | 7                | MG/DL           |
|                 |                |           |                 | CALCIUM              | 9.0             | MG/DL          | 9.0              | MG/DL           |
|                 |                |           |                 | CHLORIDE             | 97              | MMOL/L         | 97               | MEQ/L           |
|                 |                |           |                 | CREATININE           | 1.00            | MG/DL          | 1.00             | MG/DL           |
|                 |                |           |                 | GGT                  | 24              | IU/L           | 24               | U/L             |
|                 |                |           |                 | GLUCOSE              | 87              | MG/DL          | 87               | MG/DL           |
|                 |                |           |                 | POTASSIUM            | 4.1             | MMOL/L         | 4.1              | MEQ/L           |
|                 |                |           |                 | SODIUM               | 135             | MMOL/L         | 135              | MEQ/L           |
|                 |                |           |                 | TOTAL BILIRUBIN      | 0.8             | MG/DL          | 0.8              | MG/DL           |
|                 | TOTAL PROTEIN  | 6.7       | GM/DL           | 6.7                  | G/DL            |                |                  |                 |
|                 | 103            | Screening | 11JAN2010       | ALBUMIN              | 3.7             | G/DL           | 3700             | MG/DL           |
|                 |                |           |                 | ALKALINE PHOSPHATASE | 78              | U/L            | 78               | U/L             |
|                 |                |           |                 | ALT (SGPT)           | 37              | IU/L           | 37               | U/L             |
|                 |                |           |                 | AST (SGOT)           | 20              | IU/L           | 20               | U/L             |
|                 |                |           |                 | BICARBONATE          | 25              | MMOL/L         | 25               | MEQ/L           |
|                 |                |           |                 | BUN                  | 18              | MG/DL          | 18               | MG/DL           |
|                 |                |           |                 | CALCIUM              | 9.1             | MG/DL          | 9.1              | MG/DL           |
|                 |                |           |                 | CHLORIDE             | 106             | MMOL/L         | 106              | MEQ/L           |
|                 |                |           |                 | CREATININE           | 1.20            | MG/DL          | 1.20             | MG/DL           |
| GGT             |                |           |                 | 68                   | IU/L            | 68             | U/L              |                 |
| GLUCOSE         |                |           |                 | 86                   | MG/DL           | 86             | MG/DL            |                 |
| POTASSIUM       |                |           |                 | 4.5                  | MMOL/L          | 4.5            | MEQ/L            |                 |
| SODIUM          |                |           |                 | 140                  | MMOL/L          | 140            | MEQ/L            |                 |
| TOTAL BILIRUBIN | 0.9            | MG/DL     | 0.9             | MG/DL                |                 |                |                  |                 |
| TOTAL PROTEIN   | 6.7            | GM/DL     | 6.7             | G/DL                 |                 |                |                  |                 |
|                 | Day 0 Pre-dose | 12JAN2010 | GGT             | 68                   | U/L             | 68             | U/L              |                 |



Listing 10.1  
 Laboratory Data: Chemistry

| Center          | Patient | Visit         | Assessment Date | Parameter            | Recorded Result | Recorded Units | Converted Result | Converted Units |
|-----------------|---------|---------------|-----------------|----------------------|-----------------|----------------|------------------|-----------------|
| XVO_001         | 103     | Day 6         | 19JAN2010       | ALBUMIN              | 3.9             | G/DL           | 3900             | MG/DL           |
|                 |         |               |                 | ALKALINE PHOSPHATASE | 76              | U/L            | 76               | U/L             |
|                 |         |               |                 | ALT (SGPT)           | 36              | IU/L           | 36               | U/L             |
|                 |         |               |                 | AST (SGOT)           | 23              | IU/L           | 23               | U/L             |
|                 |         |               |                 | BICARBONATE          | 26              | MMOL/L         | 26               | MEQ/L           |
|                 |         |               |                 | BUN                  | 17              | MG/DL          | 17               | MG/DL           |
|                 |         |               |                 | CALCIUM              | 9.1             | MG/DL          | 9.1              | MG/DL           |
|                 |         |               |                 | CHLORIDE             | 102             | MMOL/L         | 102              | MEQ/L           |
|                 |         |               |                 | CREATININE           | 1.30            | MG/DL          | 1.30             | MG/DL           |
|                 |         |               |                 | GGT                  | 58              | IU/L           | 58               | U/L             |
|                 |         |               |                 | GLUCOSE              | 94              | MG/DL          | 94               | MG/DL           |
|                 |         |               |                 | POTASSIUM            | 4.4             | MMOL/L         | 4.4              | MEQ/L           |
|                 |         |               |                 | SODIUM               | 137             | MMOL/L         | 137              | MEQ/L           |
|                 |         |               |                 | TOTAL BILIRUBIN      | 1.0             | MG/DL          | 1.0              | MG/DL           |
|                 |         | TOTAL PROTEIN | 6.7             | GM/DL                | 6.7             | G/DL           |                  |                 |
|                 |         | Day 14        | 26JAN2010       | ALBUMIN              | 3.8             | G/DL           | 3800             | MG/DL           |
|                 |         |               |                 | ALKALINE PHOSPHATASE | 75              | U/L            | 75               | U/L             |
|                 |         |               |                 | ALT (SGPT)           | 34              | IU/L           | 34               | U/L             |
|                 |         |               |                 | AST (SGOT)           | 24              | IU/L           | 24               | U/L             |
|                 |         |               |                 | BICARBONATE          | 28              | MMOL/L         | 28               | MEQ/L           |
| BUN             | 14      |               |                 | MG/DL                | 14              | MG/DL          |                  |                 |
| CALCIUM         | 9.0     |               |                 | MG/DL                | 9.0             | MG/DL          |                  |                 |
| CHLORIDE        | 105     |               |                 | MMOL/L               | 105             | MEQ/L          |                  |                 |
| CREATININE      | 1.20    |               |                 | MG/DL                | 1.20            | MG/DL          |                  |                 |
| GGT             | 51      |               |                 | IU/L                 | 51              | U/L            |                  |                 |
| GLUCOSE         | 72      |               |                 | MG/DL                | 72              | MG/DL          |                  |                 |
| POTASSIUM       | 4.5     |               |                 | MMOL/L               | 4.5             | MEQ/L          |                  |                 |
| SODIUM          | 138     |               |                 | MMOL/L               | 138             | MEQ/L          |                  |                 |
| TOTAL BILIRUBIN | 0.9     |               |                 | MG/DL                | 0.9             | MG/DL          |                  |                 |
| TOTAL PROTEIN   | 6.5     | GM/DL         | 6.5             | G/DL                 |                 |                |                  |                 |

Listing 10.1  
Laboratory Data: Chemistry

| Center          | Patient | Visit         | Assessment Date | Parameter            | Recorded Result | Recorded Units | Converted Result | Converted Units |
|-----------------|---------|---------------|-----------------|----------------------|-----------------|----------------|------------------|-----------------|
| XVO_001         | 103     | Day 30        | 09FEB2010       | ALBUMIN              | 4.0             | GM/DL          | 4000             | MG/DL           |
|                 |         |               |                 | ALKALINE PHOSPHATASE | 77              | U/L            | 77               | U/L             |
|                 |         |               |                 | ALT (SGPT)           | 49              | IU/L           | 49               | U/L             |
|                 |         |               |                 | AST (SGOT)           | 29              | IU/L           | 29               | U/L             |
|                 |         |               |                 | BICARBONATE          | 26              | MMOL/L         | 26               | MEQ/L           |
|                 |         |               |                 | BUN                  | 17              | MG/DL          | 17               | MG/DL           |
|                 |         |               |                 | CALCIUM              | 8.9             | MG/DL          | 8.9              | MG/DL           |
|                 |         |               |                 | CHLORIDE             | 101             | MMOL/L         | 101              | MEQ/L           |
|                 |         |               |                 | CREATININE           | 1.30            | MG/DL          | 1.30             | MG/DL           |
|                 |         |               |                 | GGT                  | 63              | IU/L           | 63               | U/L             |
|                 |         |               |                 | GLUCOSE              | 91              | MG/DL          | 91               | MG/DL           |
|                 |         |               |                 | POTASSIUM            | 4.2             | MMOL/L         | 4.2              | MEQ/L           |
|                 |         |               |                 | SODIUM               | 137             | MMOL/L         | 137              | MEQ/L           |
|                 |         |               |                 | TOTAL BILIRUBIN      | 1.0             | MG/DL          | 1.0              | MG/DL           |
|                 |         | TOTAL PROTEIN | 7.0             | GM/DL                | 7.0             | G/DL           |                  |                 |
|                 |         | Day 42        | 19FEB2010       | ALBUMIN              | 3.7             | G/DL           | 3700             | MG/DL           |
|                 |         |               |                 | ALKALINE PHOSPHATASE | 76              | U/L            | 76               | U/L             |
|                 |         |               |                 | ALT (SGPT)           | 40              | IU/L           | 40               | U/L             |
|                 |         |               |                 | AST (SGOT)           | 23              | IU/L           | 23               | U/L             |
|                 |         |               |                 | BICARBONATE          | 29              | MMOL/L         | 29               | MEQ/L           |
| BUN             | 12      |               |                 | MG/DL                | 12              | MG/DL          |                  |                 |
| CALCIUM         | 8.7     |               |                 | MG/DL                | 8.7             | MG/DL          |                  |                 |
| CHLORIDE        | 102     |               |                 | MMOL/L               | 102             | MEQ/L          |                  |                 |
| CREATININE      | 1.10    |               |                 | MG/DL                | 1.10            | MG/DL          |                  |                 |
| GGT             | 55      |               |                 | IU/L                 | 55              | U/L            |                  |                 |
| GLUCOSE         | 102     |               |                 | MG/DL                | 102             | MG/DL          |                  |                 |
| POTASSIUM       | 4.4     |               |                 | MMOL/L               | 4.4             | MEQ/L          |                  |                 |
| SODIUM          | 139     |               |                 | MMOL/L               | 139             | MEQ/L          |                  |                 |
| TOTAL BILIRUBIN | 0.8     |               |                 | MG/DL                | 0.8             | MG/DL          |                  |                 |
| TOTAL PROTEIN   | 6.6     |               |                 | GM/DL                | 6.6             | G/DL           |                  |                 |

Listing 10.1  
 Laboratory Data: Chemistry

| Center          | Patient | Visit          | Assessment Date | Parameter            | Recorded Result | Recorded Units | Converted Result | Converted Units |
|-----------------|---------|----------------|-----------------|----------------------|-----------------|----------------|------------------|-----------------|
| XVO_003         | 201     | Screening      | 10NOV2009       | ALBUMIN              | 4.1             | G/DL           | 4100             | MG/DL           |
|                 |         |                |                 | ALKALINE PHOSPHATASE | 106             | U/L            | 106              | U/L             |
|                 |         |                |                 | ALT (SGPT)           | 12              | U/L            | 12               | U/L             |
|                 |         |                |                 | AST (SGOT)           | 20              | U/L            | 20               | U/L             |
|                 |         |                |                 | BICARBONATE          | 21              | MEQ/L          | 21               | MEQ/L           |
|                 |         |                |                 | BUN                  | 27              | MG/DL          | 27               | MG/DL           |
|                 |         |                |                 | CALCIUM              | 9.5             | MG/DL          | 9.5              | MG/DL           |
|                 |         |                |                 | CHLORIDE             | 103             | MEQ/L          | 103              | MEQ/L           |
|                 |         |                |                 | CREATININE           | 0.9             | MG/DL          | 0.9              | MG/DL           |
|                 |         |                |                 | GGT                  | 61              | U/L            | 61               | U/L             |
|                 |         |                |                 | GLUCOSE              | 100             | MG/DL          | 100              | MG/DL           |
|                 |         |                |                 | POTASSIUM            | 4.8             | MEQ/L          | 4.8              | MEQ/L           |
|                 |         |                |                 | SODIUM               | 138             | MEQ/L          | 138              | MEQ/L           |
|                 |         |                |                 | TOTAL BILIRUBIN      | 0.3             | MG/DL          | 0.3              | MG/DL           |
|                 |         | TOTAL PROTEIN  | 6.7             | G/DL                 | 6.7             | G/DL           |                  |                 |
|                 |         | Day 0 Pre-dose | 17NOV2009       | ALBUMIN              | 4.0             | G/DL           | 4000             | MG/DL           |
|                 |         |                |                 | ALKALINE PHOSPHATASE | 113             | U/L            | 113              | U/L             |
|                 |         |                |                 | ALT (SGPT)           | 11              | U/L            | 11               | U/L             |
|                 |         |                |                 | AST (SGOT)           | 23              | U/L            | 23               | U/L             |
|                 |         |                |                 | BICARBONATE          | 23              | MEQ/L          | 23               | MEQ/L           |
|                 |         |                |                 | BUN                  | 28              | MG/DL          | 28               | MG/DL           |
|                 |         |                |                 | CALCIUM              | 9.4             | MG/DL          | 9.4              | MG/DL           |
|                 |         |                |                 | CHLORIDE             | 100             | MEQ/L          | 100              | MEQ/L           |
|                 |         |                |                 | CREATININE           | 1.0             | MG/DL          | 1.0              | MG/DL           |
| GGT             | 60      |                |                 | U/L                  | 60              | U/L            |                  |                 |
| GLUCOSE         | 94      | MG/DL          | 94              | MG/DL                |                 |                |                  |                 |
| POTASSIUM       | 4.8     | MEQ/L          | 4.8             | MEQ/L                |                 |                |                  |                 |
| SODIUM          | 136     | MEQ/L          | 136             | MEQ/L                |                 |                |                  |                 |
| TOTAL BILIRUBIN | 0.5     | MG/DL          | 0.5             | MG/DL                |                 |                |                  |                 |
| TOTAL PROTEIN   | 6.5     | G/DL           | 6.5             | G/DL                 |                 |                |                  |                 |

Listing 10.1  
Laboratory Data: Chemistry

| Center          | Patient | Visit         | Assessment Date | Parameter            | Recorded Result | Recorded Units | Converted Result | Converted Units |
|-----------------|---------|---------------|-----------------|----------------------|-----------------|----------------|------------------|-----------------|
| XVO_003         | 201     | Day 6         | 23NOV2009       | ALBUMIN              | 4.0             | G/DL           | 4000             | MG/DL           |
|                 |         |               |                 | ALKALINE PHOSPHATASE | 153             | U/L            | 153              | U/L             |
|                 |         |               |                 | ALT (SGPT)           | 18              | U/L            | 18               | U/L             |
|                 |         |               |                 | AST (SGOT)           | 34              | U/L            | 34               | U/L             |
|                 |         |               |                 | BICARBONATE          | 22              | MEQ/L          | 22               | MEQ/L           |
|                 |         |               |                 | BUN                  | 27              | MG/DL          | 27               | MG/DL           |
|                 |         |               |                 | CALCIUM              | 8.9             | MG/DL          | 8.9              | MG/DL           |
|                 |         |               |                 | CHLORIDE             | 100             | MEQ/L          | 100              | MEQ/L           |
|                 |         |               |                 | CREATININE           | 1.1             | MG/DL          | 1.1              | MG/DL           |
|                 |         |               |                 | GGT                  | 163             | U/L            | 163              | U/L             |
|                 |         |               |                 | GLUCOSE              | 130             | MG/DL          | 130              | MG/DL           |
|                 |         |               |                 | POTASSIUM            | 4.9             | MEQ/L          | 4.9              | MEQ/L           |
|                 |         |               |                 | SODIUM               | 134             | MEQ/L          | 134              | MEQ/L           |
|                 |         |               |                 | TOTAL BILIRUBIN      | 0.4             | MG/DL          | 0.4              | MG/DL           |
|                 |         | TOTAL PROTEIN | 6.8             | G/DL                 | 6.8             | G/DL           |                  |                 |
|                 |         | Day 14        | 02DEC2009       | ALBUMIN              | 3.8             | G/DL           | 3800             | MG/DL           |
|                 |         |               |                 | ALKALINE PHOSPHATASE | 106             | U/L            | 106              | U/L             |
|                 |         |               |                 | ALT (SGPT)           | 10              | U/L            | 10               | U/L             |
|                 |         |               |                 | AST (SGOT)           | 23              | U/L            | 23               | U/L             |
|                 |         |               |                 | BICARBONATE          | 22              | MEQ/L          | 22               | MEQ/L           |
|                 |         |               |                 | BUN                  | 21              | MG/DL          | 21               | MG/DL           |
|                 |         |               |                 | CALCIUM              | 9.0             | MG/DL          | 9.0              | MG/DL           |
|                 |         |               |                 | CHLORIDE             | 100             | MEQ/L          | 100              | MEQ/L           |
|                 |         |               |                 | CREATININE           | 1.0             | MG/DL          | 1.0              | MG/DL           |
| GGT             | 74      |               |                 | U/L                  | 74              | U/L            |                  |                 |
| GLUCOSE         | 102     | MG/DL         | 102             | MG/DL                |                 |                |                  |                 |
| POTASSIUM       | 4.4     | MEQ/L         | 4.4             | MEQ/L                |                 |                |                  |                 |
| SODIUM          | 134     | MEQ/L         | 134             | MEQ/L                |                 |                |                  |                 |
| TOTAL BILIRUBIN | 0.4     | MG/DL         | 0.4             | MG/DL                |                 |                |                  |                 |
| TOTAL PROTEIN   | 6.2     | G/DL          | 6.2             | G/DL                 |                 |                |                  |                 |

Listing 10.1  
 Laboratory Data: Chemistry

| Center          | Patient | Visit         | Assessment Date | Parameter            | Recorded Result | Recorded Units | Converted Result | Converted Units |
|-----------------|---------|---------------|-----------------|----------------------|-----------------|----------------|------------------|-----------------|
| XVO_003         | 201     | Day 30        | 22DEC2009       | ALBUMIN              | 4.1             | G/DL           | 4100             | MG/DL           |
|                 |         |               |                 | ALKALINE PHOSPHATASE | 107             | U/L            | 107              | U/L             |
|                 |         |               |                 | ALT (SGPT)           | 13              | U/L            | 13               | U/L             |
|                 |         |               |                 | AST (SGOT)           | 26              | U/L            | 26               | U/L             |
|                 |         |               |                 | BICARBONATE          | 24              | MEQ/L          | 24               | MEQ/L           |
|                 |         |               |                 | BUN                  | 22              | MG/DL          | 22               | MG/DL           |
|                 |         |               |                 | CALCIUM              | 8.8             | MG/DL          | 8.8              | MG/DL           |
|                 |         |               |                 | CHLORIDE             | 102             | MEQ/L          | 102              | MEQ/L           |
|                 |         |               |                 | CREATININE           | 0.8             | MG/DL          | 0.8              | MG/DL           |
|                 |         |               |                 | GGT                  | 74              | U/L            | 74               | U/L             |
|                 |         |               |                 | GLUCOSE              | 89              | MG/DL          | 89               | MG/DL           |
|                 |         |               |                 | POTASSIUM            | 4.9             | MEQ/L          | 4.9              | MEQ/L           |
|                 |         |               |                 | SODIUM               | 136             | MEQ/L          | 136              | MEQ/L           |
|                 |         |               |                 | TOTAL BILIRUBIN      | 0.3             | MG/DL          | 0.3              | MG/DL           |
|                 |         | TOTAL PROTEIN | 6.7             | G/DL                 | 6.7             | G/DL           |                  |                 |
|                 |         | Day 42        | 29DEC2009       | ALBUMIN              | 3.9             | G/DL           | 3900             | MG/DL           |
|                 |         |               |                 | ALKALINE PHOSPHATASE | 102             | U/L            | 102              | U/L             |
|                 |         |               |                 | ALT (SGPT)           | 11              | U/L            | 11               | U/L             |
|                 |         |               |                 | AST (SGOT)           | 31              | U/L            | 31               | U/L             |
|                 |         |               |                 | BICARBONATE          | 21              | MEQ/L          | 21               | MEQ/L           |
| BUN             | 27      |               |                 | MG/DL                | 27              | MG/DL          |                  |                 |
| CALCIUM         | 8.9     |               |                 | MG/DL                | 8.9             | MG/DL          |                  |                 |
| CHLORIDE        | 102     |               |                 | MEQ/L                | 102             | MEQ/L          |                  |                 |
| CREATININE      | 1.0     |               |                 | MG/DL                | 1.0             | MG/DL          |                  |                 |
| GGT             | 74      |               |                 | U/L                  | 74              | U/L            |                  |                 |
| GLUCOSE         | 205     |               |                 | MG/DL                | 205             | MG/DL          |                  |                 |
| POTASSIUM       | 4.9     |               |                 | MEQ/L                | 4.9             | MEQ/L          |                  |                 |
| SODIUM          | 136     |               |                 | MEQ/L                | 136             | MEQ/L          |                  |                 |
| TOTAL BILIRUBIN | 0.4     |               |                 | MG/DL                | 0.4             | MG/DL          |                  |                 |
| TOTAL PROTEIN   | 6.6     |               |                 | G/DL                 | 6.6             | G/DL           |                  |                 |

Listing 10.1  
 Laboratory Data: Chemistry

| Center          | Patient | Visit          | Assessment Date | Parameter            | Recorded Result | Recorded Units | Converted Result | Converted Units |
|-----------------|---------|----------------|-----------------|----------------------|-----------------|----------------|------------------|-----------------|
| XVO_005         | 301     | Screening      | 03AUG2009       | ALBUMIN              | 3.9             | G/DL           | 3900             | MG/DL           |
|                 |         |                |                 | ALKALINE PHOSPHATASE | 50              | U/L            | 50               | U/L             |
|                 |         |                |                 | ALT (SGPT)           | 17              | U/L            | 17               | U/L             |
|                 |         |                |                 | AST (SGOT)           | 17              | U/L            | 17               | U/L             |
|                 |         |                |                 | BICARBONATE          | 28              | MMOL/L         | 28               | MEQ/L           |
|                 |         |                |                 | BUN                  | 23              | MG/DL          | 23               | MG/DL           |
|                 |         |                |                 | CALCIUM              | 9.4             | MG/DL          | 9.4              | MG/DL           |
|                 |         |                |                 | CHLORIDE             | 102             | MMOL/L         | 102              | MEQ/L           |
|                 |         |                |                 | CREATININE           | 1.2             | MG/DL          | 1.2              | MG/DL           |
|                 |         |                |                 | GGT                  | 37              | U/L            | 37               | U/L             |
|                 |         |                |                 | GLUCOSE              | 161             | MG/DL          | 161              | MG/DL           |
|                 |         |                |                 | POTASSIUM            | 4.0             | MMOL/L         | 4.0              | MEQ/L           |
|                 |         |                |                 | SODIUM               | 138             | MMOL/L         | 138              | MEQ/L           |
|                 |         |                |                 | TOTAL BILIRUBIN      | 0.6             | MG/DL          | 0.6              | MG/DL           |
|                 |         | TOTAL PROTEIN  | 6.8             | G/DL                 | 6.8             | G/DL           |                  |                 |
|                 |         | Day 0 Pre-dose | 04AUG2009       | ALBUMIN              | 3.7             | G/DL           | 3700             | MG/DL           |
|                 |         |                |                 | ALKALINE PHOSPHATASE | 52              | U/L            | 52               | U/L             |
|                 |         |                |                 | ALT (SGPT)           | 19              | U/L            | 19               | U/L             |
|                 |         |                |                 | AST (SGOT)           | 18              | U/L            | 18               | U/L             |
|                 |         |                |                 | BICARBONATE          | 24              | MMOL/L         | 24               | MEQ/L           |
| BUN             | 22      |                |                 | MG/DL                | 22              | MG/DL          |                  |                 |
| CALCIUM         | 9.3     |                |                 | MG/DL                | 9.3             | MG/DL          |                  |                 |
| CHLORIDE        | 103     |                |                 | MMOL/L               | 103             | MEQ/L          |                  |                 |
| CREATININE      | 1.1     |                |                 | MG/DL                | 1.1             | MG/DL          |                  |                 |
| GGT             | 37      |                |                 | U/L                  | 37              | U/L            |                  |                 |
| GLUCOSE         | 157     |                |                 | MG/DL                | 157             | MG/DL          |                  |                 |
| POTASSIUM       | 4.3     |                |                 | MMOL/L               | 4.3             | MEQ/L          |                  |                 |
| SODIUM          | 138     |                |                 | MMOL/L               | 138             | MEQ/L          |                  |                 |
| TOTAL BILIRUBIN | 0.9     |                |                 | MG/DL                | 0.9             | MG/DL          |                  |                 |
| TOTAL PROTEIN   | 7.0     | G/DL           | 7.0             | G/DL                 |                 |                |                  |                 |

Listing 10.1  
Laboratory Data: Chemistry

| Center          | Patient | Visit         | Assessment Date | Parameter            | Recorded Result | Recorded Units | Converted Result | Converted Units |
|-----------------|---------|---------------|-----------------|----------------------|-----------------|----------------|------------------|-----------------|
| XVO_005         | 301     | Day 6         | 10AUG2009       | ALBUMIN              | 3.9             | G/DL           | 3900             | MG/DL           |
|                 |         |               |                 | ALKALINE PHOSPHATASE | 48              | U/L            | 48               | U/L             |
|                 |         |               |                 | ALT (SGPT)           | 16              | U/L            | 16               | U/L             |
|                 |         |               |                 | AST (SGOT)           | 17              | U/L            | 17               | U/L             |
|                 |         |               |                 | BICARBONATE          | 23              | MMOL/L         | 23               | MEQ/L           |
|                 |         |               |                 | BUN                  | 22              | MG/DL          | 22               | MG/DL           |
|                 |         |               |                 | CALCIUM              | 9.5             | MG/DL          | 9.5              | MG/DL           |
|                 |         |               |                 | CHLORIDE             | 103             | MMOL/L         | 103              | MEQ/L           |
|                 |         |               |                 | CREATININE           | 1.3             | MG/DL          | 1.3              | MG/DL           |
|                 |         |               |                 | GGT                  | 36              | U/L            | 36               | U/L             |
|                 |         |               |                 | GLUCOSE              | 200             | MG/DL          | 200              | MG/DL           |
|                 |         |               |                 | POTASSIUM            | 3.8             | MMOL/L         | 3.8              | MEQ/L           |
|                 |         |               |                 | SODIUM               | 137             | MMOL/L         | 137              | MEQ/L           |
|                 |         |               |                 | TOTAL BILIRUBIN      | 0.4             | MG/DL          | 0.4              | MG/DL           |
|                 |         | TOTAL PROTEIN | 7               | G/DL                 | 7               | G/DL           |                  |                 |
|                 |         | Day 14        | 18AUG2009       | ALBUMIN              | 3.8             | G/DL           | 3800             | MG/DL           |
|                 |         |               |                 | ALKALINE PHOSPHATASE | 51              | U/L            | 51               | U/L             |
|                 |         |               |                 | ALT (SGPT)           | 13              | U/L            | 13               | U/L             |
|                 |         |               |                 | AST (SGOT)           | 14              | U/L            | 14               | U/L             |
|                 |         |               |                 | BICARBONATE          | 24              | MMOL/L         | 24               | MEQ/L           |
|                 |         |               |                 | BUN                  | 24              | MG/DL          | 24               | MG/DL           |
|                 |         |               |                 | CALCIUM              | 9.3             | MG/DL          | 9.3              | MG/DL           |
|                 |         |               |                 | CHLORIDE             | 101             | MMOL/L         | 101              | MEQ/L           |
|                 |         |               |                 | CREATININE           | 1.2             | MG/DL          | 1.2              | MG/DL           |
| GGT             | 32      |               |                 | U/L                  | 32              | U/L            |                  |                 |
| GLUCOSE         | 190     | MG/DL         | 190             | MG/DL                |                 |                |                  |                 |
| POTASSIUM       | 4.1     | MMOL/L        | 4.1             | MEQ/L                |                 |                |                  |                 |
| SODIUM          | 137     | MMOL/L        | 137             | MEQ/L                |                 |                |                  |                 |
| TOTAL BILIRUBIN | 0.5     | MG/DL         | 0.5             | MG/DL                |                 |                |                  |                 |
| TOTAL PROTEIN   | 7       | G/DL          | 7               | G/DL                 |                 |                |                  |                 |

Listing 10.1  
 Laboratory Data: Chemistry

| Center          | Patient | Visit         | Assessment Date | Parameter            | Recorded Result | Recorded Units | Converted Result | Converted Units |
|-----------------|---------|---------------|-----------------|----------------------|-----------------|----------------|------------------|-----------------|
| XVO_005         | 301     | Day 30        | 04SEP2009       | ALBUMIN              | 3.9             | G/DL           | 3900             | MG/DL           |
|                 |         |               |                 | ALKALINE PHOSPHATASE | 61              | U/L            | 61               | U/L             |
|                 |         |               |                 | ALT (SGPT)           | 16              | U/L            | 16               | U/L             |
|                 |         |               |                 | AST (SGOT)           | 17              | U/L            | 17               | U/L             |
|                 |         |               |                 | BICARBONATE          | 30              | MMOL/L         | 30               | MEQ/L           |
|                 |         |               |                 | BUN                  | 17              | MG/DL          | 17               | MG/DL           |
|                 |         |               |                 | CALCIUM              | 9.3             | MG/DL          | 9.3              | MG/DL           |
|                 |         |               |                 | CHLORIDE             | 99              | MMOL/L         | 99               | MEQ/L           |
|                 |         |               |                 | CREATININE           | 1.2             | MG/DL          | 1.2              | MG/DL           |
|                 |         |               |                 | GGT                  | 40              | U/L            | 40               | U/L             |
|                 |         |               |                 | GLUCOSE              | 144             | MG/DL          | 144              | MG/DL           |
|                 |         |               |                 | POTASSIUM            | 4.1             | MMOL/L         | 4.1              | MEQ/L           |
|                 |         |               |                 | SODIUM               | 138             | MMOL/L         | 138              | MEQ/L           |
|                 |         |               |                 | TOTAL BILIRUBIN      | 0.7             | MG/DL          | 0.7              | MG/DL           |
|                 |         | TOTAL PROTEIN | 7.1             | G/DL                 | 7.1             | G/DL           |                  |                 |
|                 |         | Day 42        | 15SEP2009       | ALBUMIN              | 3.8             | G/DL           | 3800             | MG/DL           |
|                 |         |               |                 | ALKALINE PHOSPHATASE | 53              | U/L            | 53               | U/L             |
|                 |         |               |                 | ALT (SGPT)           | 15              | U/L            | 15               | U/L             |
|                 |         |               |                 | AST (SGOT)           | 16              | U/L            | 16               | U/L             |
|                 |         |               |                 | BICARBONATE          | 24              | MMOL/L         | 24               | MEQ/L           |
|                 |         |               |                 | BUN                  | 21              | MG/DL          | 21               | MG/DL           |
|                 |         |               |                 | CALCIUM              | 9.4             | MG/DL          | 9.4              | MG/DL           |
|                 |         |               |                 | CHLORIDE             | 102             | MMOL/L         | 102              | MEQ/L           |
|                 |         |               |                 | CREATININE           | 1.1             | MG/DL          | 1.1              | MG/DL           |
| GGT             | 34      |               |                 | U/L                  | 34              | U/L            |                  |                 |
| GLUCOSE         | 200     | MG/DL         | 200             | MG/DL                |                 |                |                  |                 |
| POTASSIUM       | 4.1     | MMOL/L        | 4.1             | MEQ/L                |                 |                |                  |                 |
| SODIUM          | 138     | MMOL/L        | 138             | MEQ/L                |                 |                |                  |                 |
| TOTAL BILIRUBIN | 0.6     | MG/DL         | 0.6             | MG/DL                |                 |                |                  |                 |
| TOTAL PROTEIN   | 7.1     | G/DL          | 7.1             | G/DL                 |                 |                |                  |                 |



Listing 10.1  
 Laboratory Data: Chemistry

| Center          | Patient | Visit          | Assessment Date | Parameter            | Recorded Result | Recorded Units       | Converted Result | Converted Units |      |       |
|-----------------|---------|----------------|-----------------|----------------------|-----------------|----------------------|------------------|-----------------|------|-------|
| XVO_005         | 302     | Screening      | 14DEC2009       | ALBUMIN              | 3.8             | G/DL                 | 3800             | MG/DL           |      |       |
|                 |         |                |                 | ALKALINE PHOSPHATASE | 177             | U/L                  | 177              | U/L             |      |       |
|                 |         |                |                 | ALT (SGPT)           | 13              | U/L                  | 13               | U/L             |      |       |
|                 |         |                |                 | AST (SGOT)           | 22              | U/L                  | 22               | U/L             |      |       |
|                 |         |                |                 | BICARBONATE          | 23              | MMOL/L               | 23               | MEQ/L           |      |       |
|                 |         |                |                 | BUN                  | 15              | MG/DL                | 15               | MG/DL           |      |       |
|                 |         |                |                 | CALCIUM              | 9.2             | MG/DL                | 9.2              | MG/DL           |      |       |
|                 |         |                |                 | CHLORIDE             | 111             | MMOL/L               | 111              | MEQ/L           |      |       |
|                 |         |                |                 | CREATININE           | 1.6             | MG/DL                | 1.6              | MG/DL           |      |       |
|                 |         |                |                 | GGT                  | 18              | U/L                  | 18               | U/L             |      |       |
|                 |         |                |                 | GLUCOSE              | 128             | MG/DL                | 128              | MG/DL           |      |       |
|                 |         |                |                 | POTASSIUM            | 4.0             | MMOL/L               | 4.0              | MEQ/L           |      |       |
|                 |         |                |                 | SODIUM               | 140             | MMOL/L               | 140              | MEQ/L           |      |       |
|                 |         |                |                 | TOTAL BILIRUBIN      | 0.4             | MG/DL                | 0.4              | MG/DL           |      |       |
|                 |         | TOTAL PROTEIN  | 6.7             | G/DL                 | 6.7             | G/DL                 |                  |                 |      |       |
|                 |         | Day 0 Pre-dose |                 |                      | 15DEC2009       | ALBUMIN              | 3.7              | G/DL            | 3700 | MG/DL |
|                 |         |                |                 |                      |                 | ALKALINE PHOSPHATASE | 183              | U/L             | 183  | U/L   |
|                 |         |                |                 |                      |                 | ALT (SGPT)           | 14               | U/L             | 14   | U/L   |
|                 |         |                |                 |                      |                 | AST (SGOT)           | 25               | U/L             | 25   | U/L   |
|                 |         |                |                 |                      |                 | BICARBONATE          | 21               | MMOL/L          | 21   | MEQ/L |
| BUN             | 14      |                |                 |                      |                 | MG/DL                | 14               | MG/DL           |      |       |
| CALCIUM         | 9.4     |                |                 |                      |                 | MG/DL                | 9.4              | MG/DL           |      |       |
| CHLORIDE        | 111     |                |                 |                      |                 | MMOL/L               | 111              | MEQ/L           |      |       |
| CREATININE      | 1.2     |                |                 |                      |                 | MG/DL                | 1.2              | MG/DL           |      |       |
| GGT             | 22      |                |                 |                      |                 | U/L                  | 22               | U/L             |      |       |
| GLUCOSE         | 102     | MG/DL          | 102             | MG/DL                |                 |                      |                  |                 |      |       |
| POTASSIUM       | 4.2     | MMOL/L         | 4.2             | MEQ/L                |                 |                      |                  |                 |      |       |
| SODIUM          | 138     | MMOL/L         | 138             | MEQ/L                |                 |                      |                  |                 |      |       |
| TOTAL BILIRUBIN | 0.5     | MG/DL          | 0.5             | MG/DL                |                 |                      |                  |                 |      |       |
| TOTAL PROTEIN   | 6.9     | G/DL           | 6.9             | G/DL                 |                 |                      |                  |                 |      |       |

Listing 10.1  
Laboratory Data: Chemistry

| Center          | Patient | Visit         | Assessment Date | Parameter            | Recorded Result | Recorded Units | Converted Result | Converted Units |
|-----------------|---------|---------------|-----------------|----------------------|-----------------|----------------|------------------|-----------------|
| XVO_005         | 302     | Day 6         | 21DEC2009       | ALBUMIN              | 3.6             | G/DL           | 3600             | MG/DL           |
|                 |         |               |                 | ALKALINE PHOSPHATASE | 199             | U/L            | 199              | U/L             |
|                 |         |               |                 | ALT (SGPT)           | 14              | U/L            | 14               | U/L             |
|                 |         |               |                 | AST (SGOT)           | 23              | U/L            | 23               | U/L             |
|                 |         |               |                 | BICARBONATE          | 23              | MMOL/L         | 23               | MEQ/L           |
|                 |         |               |                 | BUN                  | 12              | MG/DL          | 12               | MG/DL           |
|                 |         |               |                 | CALCIUM              | 9.4             | MG/DL          | 9.4              | MG/DL           |
|                 |         |               |                 | CHLORIDE             | 111             | MMOL/L         | 111              | MEQ/L           |
|                 |         |               |                 | CREATININE           | 1.3             | MG/DL          | 1.3              | MG/DL           |
|                 |         |               |                 | GGT                  | 22              | U/L            | 22               | U/L             |
|                 |         |               |                 | GLUCOSE              | 77              | MG/DL          | 77               | MG/DL           |
|                 |         |               |                 | POTASSIUM            | 3.7             | MMOL/L         | 3.7              | MEQ/L           |
|                 |         |               |                 | SODIUM               | 140             | MMOL/L         | 140              | MEQ/L           |
|                 |         |               |                 | TOTAL BILIRUBIN      | 0.7             | MG/DL          | 0.7              | MG/DL           |
|                 |         | TOTAL PROTEIN | 6.6             | G/DL                 | 6.6             | G/DL           |                  |                 |
|                 |         | Day 14        | 29DEC2009       | ALBUMIN              | 3.3             | G/DL           | 3300             | MG/DL           |
|                 |         |               |                 | ALKALINE PHOSPHATASE | 220             | U/L            | 220              | U/L             |
|                 |         |               |                 | ALT (SGPT)           | 11              | U/L            | 11               | U/L             |
|                 |         |               |                 | AST (SGOT)           | 24              | U/L            | 24               | U/L             |
|                 |         |               |                 | BICARBONATE          | 23              | MMOL/L         | 23               | MEQ/L           |
| BUN             | 13      |               |                 | MG/DL                | 13              | MG/DL          |                  |                 |
| CALCIUM         | 9.2     |               |                 | MG/DL                | 9.2             | MG/DL          |                  |                 |
| CHLORIDE        | 110     |               |                 | MMOL/L               | 110             | MEQ/L          |                  |                 |
| CREATININE      | 1.3     |               |                 | MG/DL                | 1.3             | MG/DL          |                  |                 |
| GGT             | 22      |               |                 | U/L                  | 22              | U/L            |                  |                 |
| GLUCOSE         | 79      |               |                 | MG/DL                | 79              | MG/DL          |                  |                 |
| POTASSIUM       | 4       |               |                 | MMOL/L               | 4               | MEQ/L          |                  |                 |
| SODIUM          | 139     |               |                 | MMOL/L               | 139             | MEQ/L          |                  |                 |
| TOTAL BILIRUBIN | 0.6     |               |                 | MG/DL                | 0.6             | MG/DL          |                  |                 |
| TOTAL PROTEIN   | 6.5     |               |                 | G/DL                 | 6.5             | G/DL           |                  |                 |

Listing 10.1  
 Laboratory Data: Chemistry

| Center          | Patient | Visit         | Assessment Date | Parameter            | Recorded Result | Recorded Units | Converted Result | Converted Units |
|-----------------|---------|---------------|-----------------|----------------------|-----------------|----------------|------------------|-----------------|
| XVO_005         | 302     | Day 30        | 15JAN2010       | ALBUMIN              | 4.0             | G/DL           | 4000             | MG/DL           |
|                 |         |               |                 | ALKALINE PHOSPHATASE | 285.0           | U/L            | 285.0            | U/L             |
|                 |         |               |                 | ALT (SGPT)           | 11.0            | U/L            | 11.0             | U/L             |
|                 |         |               |                 | AST (SGOT)           | 24.0            | U/L            | 24.0             | U/L             |
|                 |         |               |                 | BICARBONATE          | 21.0            | MMOL/L         | 21.0             | MEQ/L           |
|                 |         |               |                 | BUN                  | 21              | MG/DL          | 21               | MG/DL           |
|                 |         |               |                 | CALCIUM              | 8.5             | MG/DL          | 8.5              | MG/DL           |
|                 |         |               |                 | CHLORIDE             | 108.0           | MMOL/L         | 108.0            | MEQ/L           |
|                 |         |               |                 | CREATININE           | 1.3             | MG/DL          | 1.3              | MG/DL           |
|                 |         |               |                 | GGT                  | 23.0            | U/L            | 23.0             | U/L             |
|                 |         |               |                 | GLUCOSE              | 85.0            | MG/DL          | 85.0             | MG/DL           |
|                 |         |               |                 | POTASSIUM            | 4.1             | MMOL/L         | 4.1              | MEQ/L           |
|                 |         |               |                 | SODIUM               | 134             | MMOL/L         | 134              | MEQ/L           |
|                 |         |               |                 | TOTAL BILIRUBIN      | 0.5             | MG/DL          | 0.5              | MG/DL           |
|                 |         | TOTAL PROTEIN | 7.0             | G/DL                 | 7.0             | G/DL           |                  |                 |
|                 |         | Day 42        | 25JAN2010       | ALBUMIN              | 3.5             | G/DL           | 3500             | MG/DL           |
|                 |         |               |                 | ALKALINE PHOSPHATASE | 298             | U/L            | 298              | U/L             |
|                 |         |               |                 | ALT (SGPT)           | 12              | U/L            | 12               | U/L             |
|                 |         |               |                 | AST (SGOT)           | 32              | U/L            | 32               | U/L             |
|                 |         |               |                 | BICARBONATE          | 21              | MMOL/L         | 21               | MEQ/L           |
|                 |         |               |                 | BUN                  | 16              | MG/DL          | 16               | MG/DL           |
|                 |         |               |                 | CALCIUM              | 8.8             | MG/DL          | 8.8              | MG/DL           |
|                 |         |               |                 | CHLORIDE             | 112             | MMOL/L         | 112              | MEQ/L           |
|                 |         |               |                 | CREATININE           | 1.2             | MG/DL          | 1.2              | MG/DL           |
| GGT             | 22      |               |                 | U/L                  | 22              | U/L            |                  |                 |
| GLUCOSE         | 97      | MG/DL         | 97              | MG/DL                |                 |                |                  |                 |
| POTASSIUM       | 5.1     | MMOL/L        | 5.1             | MEQ/L                |                 |                |                  |                 |
| SODIUM          | 139     | MMOL/L        | 139             | MEQ/L                |                 |                |                  |                 |
| TOTAL BILIRUBIN | 0.5     | MG/DL         | 0.5             | MG/DL                |                 |                |                  |                 |
| TOTAL PROTEIN   | 6.4     | G/DL          | 6.4             | G/DL                 |                 |                |                  |                 |

Listing 10.1  
 Laboratory Data: Chemistry

| Center          | Patient | Visit          | Assessment Date | Parameter            | Recorded Result | Recorded Units | Converted Result | Converted Units |
|-----------------|---------|----------------|-----------------|----------------------|-----------------|----------------|------------------|-----------------|
| XVO_007         | 401     | Screening      | 04NOV2009       | ALBUMIN              | 3.7             | G/DL           | 3700             | MG/DL           |
|                 |         |                |                 | ALKALINE PHOSPHATASE | 85              | U/L            | 85               | U/L             |
|                 |         |                |                 | ALT (SGPT)           | 9               | U/L            | 9                | U/L             |
|                 |         |                |                 | AST (SGOT)           | 25              | U/L            | 25               | U/L             |
|                 |         |                |                 | BICARBONATE          | 29              | MEQ/L          | 29               | MEQ/L           |
|                 |         |                |                 | BUN                  | 13              | MG/DL          | 13               | MG/DL           |
|                 |         |                |                 | CALCIUM              | 8.8             | MG/DL          | 8.8              | MG/DL           |
|                 |         |                |                 | CHLORIDE             | 104             | MEQ/L          | 104              | MEQ/L           |
|                 |         |                |                 | CREATININE           | 0.65            | MG/DL          | 0.65             | MG/DL           |
|                 |         |                |                 | GGT                  | 20              | U/L            | 20               | U/L             |
|                 |         |                |                 | GLUCOSE              | 122             | MG/DL          | 122              | MG/DL           |
|                 |         |                |                 | POTASSIUM            | 4.0             | MEQ/L          | 4.0              | MEQ/L           |
|                 |         |                |                 | SODIUM               | 139             | MEQ/L          | 139              | MEQ/L           |
|                 |         |                |                 | TOTAL BILIRUBIN      | 0.5             | MG/DL          | 0.5              | MG/DL           |
|                 |         | TOTAL PROTEIN  | 7.4             | G/DL                 | 7.4             | G/DL           |                  |                 |
|                 |         | Day 0 Pre-dose | 10NOV2009       | ALBUMIN              | 3.8             | G/DL           | 3800             | MG/DL           |
|                 |         |                |                 | ALKALINE PHOSPHATASE | 89              | U/L            | 89               | U/L             |
|                 |         |                |                 | ALT (SGPT)           | 17              | U/L            | 17               | U/L             |
|                 |         |                |                 | AST (SGOT)           | 27              | U/L            | 27               | U/L             |
|                 |         |                |                 | BICARBONATE          | 31              | MEQ/L          | 31               | MEQ/L           |
|                 |         |                |                 | BUN                  | 17              | MG/DL          | 17               | MG/DL           |
|                 |         |                |                 | CALCIUM              | 9.1             | MG/DL          | 9.1              | MG/DL           |
|                 |         |                |                 | CHLORIDE             | 102             | MEQ/L          | 102              | MEQ/L           |
|                 |         |                |                 | CREATININE           | 0.62            | MG/DL          | 0.62             | MG/DL           |
| GGT             | 22      |                |                 | U/L                  | 22              | U/L            |                  |                 |
| GLUCOSE         | 102     | MG/DL          | 102             | MG/DL                |                 |                |                  |                 |
| POTASSIUM       | 4.2     | MEQ/L          | 4.2             | MEQ/L                |                 |                |                  |                 |
| SODIUM          | 139     | MEQ/L          | 139             | MEQ/L                |                 |                |                  |                 |
| TOTAL BILIRUBIN | 0.5     | MG/DL          | 0.5             | MG/DL                |                 |                |                  |                 |
| TOTAL PROTEIN   | 7.7     | G/DL           | 7.7             | G/DL                 |                 |                |                  |                 |

Listing 10.1  
 Laboratory Data: Chemistry

| Center          | Patient | Visit         | Assessment Date | Parameter            | Recorded Result | Recorded Units | Converted Result | Converted Units |
|-----------------|---------|---------------|-----------------|----------------------|-----------------|----------------|------------------|-----------------|
| XVO_007         | 401     | Day 6         | 16NOV2009       | ALBUMIN              | 3.6             | G/DL           | 3600             | MG/DL           |
|                 |         |               |                 | ALKALINE PHOSPHATASE | 92              | U/L            | 92               | U/L             |
|                 |         |               |                 | ALT (SGPT)           | 19              | U/L            | 19               | U/L             |
|                 |         |               |                 | AST (SGOT)           | 24              | U/L            | 24               | U/L             |
|                 |         |               |                 | BICARBONATE          | 28              | MEQ/L          | 28               | MEQ/L           |
|                 |         |               |                 | BUN                  | 16              | MG/DL          | 16               | MG/DL           |
|                 |         |               |                 | CALCIUM              | 8.8             | MG/DL          | 8.8              | MG/DL           |
|                 |         |               |                 | CHLORIDE             | 105             | MEQ/L          | 105              | MEQ/L           |
|                 |         |               |                 | CREATININE           | 0.6             | MG/DL          | 0.6              | MG/DL           |
|                 |         |               |                 | GGT                  | 21              | U/L            | 21               | U/L             |
|                 |         |               |                 | GLUCOSE              | 105             | MG/DL          | 105              | MG/DL           |
|                 |         |               |                 | POTASSIUM            | 4.2             | MEQ/L          | 4.2              | MEQ/L           |
|                 |         |               |                 | SODIUM               | 140             | MEQ/L          | 140              | MEQ/L           |
|                 |         |               |                 | TOTAL BILIRUBIN      | 0.5             | MG/DL          | 0.5              | MG/DL           |
|                 |         | TOTAL PROTEIN | 7.0             | G/DL                 | 7.0             | G/DL           |                  |                 |
|                 |         | Day 14        | 24NOV2009       | ALBUMIN              | 3.7             | G/DL           | 3700             | MG/DL           |
|                 |         |               |                 | ALKALINE PHOSPHATASE | 85              | U/L            | 85               | U/L             |
|                 |         |               |                 | ALT (SGPT)           | 15              | U/L            | 15               | U/L             |
|                 |         |               |                 | AST (SGOT)           | 24              | U/L            | 24               | U/L             |
|                 |         |               |                 | BICARBONATE          | 27              | MEQ/L          | 27               | MEQ/L           |
| BUN             | 16      |               |                 | MG/DL                | 16              | MG/DL          |                  |                 |
| CALCIUM         | 8.8     |               |                 | MG/DL                | 8.8             | MG/DL          |                  |                 |
| CHLORIDE        | 105     |               |                 | MEQ/L                | 105             | MEQ/L          |                  |                 |
| CREATININE      | 0.58    |               |                 | MG/DL                | 0.58            | MG/DL          |                  |                 |
| GGT             | 21      |               |                 | U/L                  | 21              | U/L            |                  |                 |
| GLUCOSE         | 101     |               |                 | MG/DL                | 101             | MG/DL          |                  |                 |
| POTASSIUM       | 4.1     |               |                 | MEQ/L                | 4.1             | MEQ/L          |                  |                 |
| SODIUM          | 139     |               |                 | MEQ/L                | 139             | MEQ/L          |                  |                 |
| TOTAL BILIRUBIN | 0.5     |               |                 | MG/DL                | 0.5             | MG/DL          |                  |                 |
| TOTAL PROTEIN   | 7.3     |               |                 | G/DL                 | 7.3             | G/DL           |                  |                 |

Listing 10.1  
 Laboratory Data: Chemistry

| Center          | Patient | Visit         | Assessment Date | Parameter            | Recorded Result | Recorded Units | Converted Result | Converted Units |
|-----------------|---------|---------------|-----------------|----------------------|-----------------|----------------|------------------|-----------------|
| XVO_007         | 401     | Day 30        | 08DEC2009       | ALBUMIN              | 3.8             | GM/DL          | 3800             | MG/DL           |
|                 |         |               |                 | ALKALINE PHOSPHATASE | 84              | U/L            | 84               | U/L             |
|                 |         |               |                 | ALT (SGPT)           | 8               | U/L            | 8                | U/L             |
|                 |         |               |                 | AST (SGOT)           | 28              | U/L            | 28               | U/L             |
|                 |         |               |                 | BICARBONATE          | 29              | MEQ/L          | 29               | MEQ/L           |
|                 |         |               |                 | BUN                  | 16              | MG/DL          | 16               | MG/DL           |
|                 |         |               |                 | CALCIUM              | 9.1             | MG/DL          | 9.1              | MG/DL           |
|                 |         |               |                 | CHLORIDE             | 102             | MEQ/L          | 102              | MEQ/L           |
|                 |         |               |                 | CREATININE           | 0.67            | MG/DL          | 0.67             | MG/DL           |
|                 |         |               |                 | GGT                  | 21              | U/L            | 21               | U/L             |
|                 |         |               |                 | GLUCOSE              | 103             | MG/DL          | 103              | MG/DL           |
|                 |         |               |                 | POTASSIUM            | 3.9             | MEQ/L          | 3.9              | MEQ/L           |
|                 |         |               |                 | SODIUM               | 140             | MEQ/L          | 140              | MEQ/L           |
|                 |         |               |                 | TOTAL BILIRUBIN      | 0.6             | MG/DL          | 0.6              | MG/DL           |
|                 |         | TOTAL PROTEIN | 7.5             | G/DL                 | 7.5             | G/DL           |                  |                 |
|                 |         | Day 42        | 22DEC2009       | ALBUMIN              | 3.7             | G/DL           | 3700             | MG/DL           |
|                 |         |               |                 | ALKALINE PHOSPHATASE | 82              | U/L            | 82               | U/L             |
|                 |         |               |                 | ALT (SGPT)           | 10              | U/L            | 10               | U/L             |
|                 |         |               |                 | AST (SGOT)           | 22              | U/L            | 22               | U/L             |
|                 |         |               |                 | BICARBONATE          | 28              | MEQ/L          | 28               | MEQ/L           |
| BUN             | 14      |               |                 | MG/DL                | 14              | MG/DL          |                  |                 |
| CALCIUM         | 8.9     |               |                 | MG/DL                | 8.9             | MG/DL          |                  |                 |
| CHLORIDE        | 104     |               |                 | MEQ/L                | 104             | MEQ/L          |                  |                 |
| CREATININE      | 0.60    |               |                 | MG/DL                | 0.60            | MG/DL          |                  |                 |
| GGT             | 18      |               |                 | U/L                  | 18              | U/L            |                  |                 |
| GLUCOSE         | 86      |               |                 | MG/DL                | 86              | MG/DL          |                  |                 |
| POTASSIUM       | 3.7     |               |                 | MEQ/L                | 3.7             | MEQ/L          |                  |                 |
| SODIUM          | 137     |               |                 | MEQ/L                | 137             | MEQ/L          |                  |                 |
| TOTAL BILIRUBIN | 0.5     |               |                 | MG/DL                | 0.5             | MG/DL          |                  |                 |
| TOTAL PROTEIN   | 7.2     |               |                 | G/DL                 | 7.2             | G/DL           |                  |                 |

Listing 10.1  
 Laboratory Data: Chemistry

| Center          | Patient | Visit          | Assessment Date | Parameter            | Recorded Result | Recorded Units | Converted Result | Converted Units |
|-----------------|---------|----------------|-----------------|----------------------|-----------------|----------------|------------------|-----------------|
| XVO_007         | 402     | Screening      | 03DEC2009       | ALBUMIN              | 4.2             | G/DL           | 4200             | MG/DL           |
|                 |         |                |                 | ALKALINE PHOSPHATASE | 297             | U/L            | 297              | U/L             |
|                 |         |                |                 | ALT (SGPT)           | 16              | U/L            | 16               | U/L             |
|                 |         |                |                 | AST (SGOT)           | 52              | U/L            | 52               | U/L             |
|                 |         |                |                 | BICARBONATE          | 28              | MEQ/L          | 28               | MEQ/L           |
|                 |         |                |                 | BUN                  | 20              | MG/DL          | 20               | MG/DL           |
|                 |         |                |                 | CALCIUM              | 9.6             | MG/DL          | 9.6              | MG/DL           |
|                 |         |                |                 | CHLORIDE             | 102             | MEQ/L          | 102              | MEQ/L           |
|                 |         |                |                 | CREATININE           | 0.93            | MG/DL          | 0.93             | MG/DL           |
|                 |         |                |                 | GGT                  | 51              | U/L            | 51               | U/L             |
|                 |         |                |                 | GLUCOSE              | 83              | MG/DL          | 83               | MG/DL           |
|                 |         |                |                 | POTASSIUM            | 4.6             | MEQ/L          | 4.6              | MEQ/L           |
|                 |         |                |                 | SODIUM               | 139             | MEQ/L          | 139              | MEQ/L           |
|                 |         |                |                 | TOTAL BILIRUBIN      | 0.2             | MG/DL          | 0.2              | MG/DL           |
|                 |         |                |                 | TOTAL PROTEIN        | 7.9             | G/DL           | 7.9              | G/DL            |
|                 |         | Day 0 Pre-dose | 08DEC2009       | ALBUMIN              | 4.2             | G/DL           | 4200             | MG/DL           |
|                 |         |                |                 | ALKALINE PHOSPHATASE | 256             | U/L            | 256              | U/L             |
|                 |         |                |                 | ALT (SGPT)           | 29              | U/L            | 29               | U/L             |
|                 |         |                |                 | AST (SGOT)           | 40              | U/L            | 40               | U/L             |
|                 |         |                |                 | BICARBONATE          | 27              | MEQ/L          | 27               | MEQ/L           |
| BUN             | 28      |                |                 | MG/DL                | 28              | MG/DL          |                  |                 |
| CALCIUM         | 10.2    |                |                 | MG/DL                | 10.2            | MG/DL          |                  |                 |
| CHLORIDE        | 105     |                |                 | MEQ/L                | 105             | MEQ/L          |                  |                 |
| CREATININE      | 0.94    |                |                 | MG/DL                | 0.94            | MG/DL          |                  |                 |
| GGT             | 49      |                |                 | U/L                  | 49              | U/L            |                  |                 |
| GLUCOSE         | 108     | MG/DL          | 108             | MG/DL                |                 |                |                  |                 |
| POTASSIUM       | 5.4     | MEQ/L          | 5.4             | MEQ/L                |                 |                |                  |                 |
| SODIUM          | 141     | MEQ/L          | 141             | MEQ/L                |                 |                |                  |                 |
| TOTAL BILIRUBIN | 0.5     | MG/DL          | 0.5             | MG/DL                |                 |                |                  |                 |
| TOTAL PROTEIN   | 7.4     | G/DL           | 7.4             | G/DL                 |                 |                |                  |                 |

Listing 10.1  
 Laboratory Data: Chemistry

| Center  | Patient | Visit     | Assessment Date | Parameter            | Recorded Result | Recorded Units | Converted Result | Converted Units |
|---------|---------|-----------|-----------------|----------------------|-----------------|----------------|------------------|-----------------|
| XVO_007 | 402     | Day 6     | 14DEC2009       | ALBUMIN              | 3.9             | G/DL           | 3900             | MG/DL           |
|         |         |           |                 | ALKALINE PHOSPHATASE | 171             | U/L            | 171              | U/L             |
|         |         |           |                 | ALT (SGPT)           | 25              | U/L            | 25               | U/L             |
|         |         |           |                 | AST (SGOT)           | 43              | U/L            | 43               | U/L             |
|         |         |           |                 | BICARBONATE          | 25              | MEQ/L          | 25               | MEQ/L           |
|         |         |           |                 | BUN                  | 19              | MG/DL          | 19               | MG/DL           |
|         |         |           |                 | CALCIUM              | 9.4             | MG/DL          | 9.4              | MG/DL           |
|         |         |           |                 | CHLORIDE             | 103             | MEQ/L          | 103              | MEQ/L           |
|         |         |           |                 | CREATININE           | 0.81            | MG/DL          | 0.81             | MG/DL           |
|         |         |           |                 | GGT                  | 43              | U/L            | 43               | U/L             |
|         |         |           |                 | GLUCOSE              | 111             | MG/DL          | 111              | MG/DL           |
|         |         |           |                 | POTASSIUM            | 4.6             | MEQ/L          | 4.6              | MEQ/L           |
|         |         |           |                 | SODIUM               | 137             | MEQ/L          | 137              | MEQ/L           |
|         |         |           |                 | TOTAL BILIRUBIN      | 0.2             | MG/DL          | 0.2              | MG/DL           |
|         |         |           |                 | TOTAL PROTEIN        | 7.1             | G/DL           | 7.1              | G/DL            |
|         | Day 14  | 22DEC2009 | GGT             | 53                   | U/L             | 53             | U/L              |                 |
|         | Day 30  | 05JAN2010 | GGT             | 47                   | U/L             | 47             | U/L              |                 |
|         | Day 42  | 19JAN2010 | GGT             | 32                   | U/L             | 32             | U/L              |                 |



Listing 10.2  
Laboratory Data: Hematology

| Center            | Patient | Visit               | Assessment Date | Parameter           | Recorded Result | Recorded Units      | Converted Result | Converted Units     |
|-------------------|---------|---------------------|-----------------|---------------------|-----------------|---------------------|------------------|---------------------|
| XVO_001           | 101     | Screening           | 09NOV2009       | ANC                 | 3.60            | K/UL                | 3.60             | 10 <sup>3</sup> /UL |
|                   |         |                     |                 | BASOPHILS           | .5              | %                   | .5               | %                   |
|                   |         |                     |                 | EOSINOPHILS         | 1.5             | %                   | 1.5              | %                   |
|                   |         |                     |                 | HEMATOCRIT(PCV)     | 40.1            | %                   | 40.1             | %                   |
|                   |         |                     |                 | HEMOGLOBIN          | 13.4            | G/DL                | 13.4             | G/DL                |
|                   |         |                     |                 | LYMPHOCYTES         | 30.9            | %                   | 30.9             | %                   |
|                   |         |                     |                 | MCH                 | 32.7            | PG                  | 32.7             | PG                  |
|                   |         |                     |                 | MCHC                | 33.5            | GM/DL               | 33.5             | PG                  |
|                   |         |                     |                 | MCV                 | 97.7            | FL                  | 97.7             | FL                  |
|                   |         |                     |                 | MONOCYTES           | 7.3             | %                   | 7.3              | %                   |
|                   |         | PLATELETS           | 209             | 10 <sup>3</sup> /UL | 209             | 10 <sup>3</sup> /UL |                  |                     |
|                   |         | RED BLOOD COUNT     | 4.11            | MILLION/UL          | 4.11            | 10 <sup>6</sup> /UL |                  |                     |
|                   |         | WHITE BLOOD COUNT   | 6.0             | K/UL                | 6.0             | 10 <sup>3</sup> /UL |                  |                     |
|                   |         | Day 6               | 16NOV2009       | ANC                 | 2.70            | K/UL                | 2.70             | 10 <sup>3</sup> /UL |
|                   |         |                     |                 | BASOPHILS           | 0.5             | %                   | 0.5              | %                   |
|                   |         |                     |                 | EOSINOPHILS         | 1.4             | %                   | 1.4              | %                   |
|                   |         |                     |                 | HEMATOCRIT(PCV)     | 38.7            | %                   | 38.7             | %                   |
|                   |         |                     |                 | HEMOGLOBIN          | 13.2            | GM/DL               | 13.2             | G/DL                |
|                   |         |                     |                 | LYMPHOCYTES         | 29.4            | %                   | 29.4             | %                   |
|                   |         |                     |                 | MCH                 | 32.9            | PG                  | 32.9             | PG                  |
| MCHC              | 34.1    |                     |                 | GM/DL               | 34.1            | PG                  |                  |                     |
| MCV               | 96.3    |                     |                 | FL                  | 96.3            | FL                  |                  |                     |
| MONOCYTES         | 7.8     |                     |                 | %                   | 7.8             | %                   |                  |                     |
| PLATELETS         | 206     | K/UL                | 206             | 10 <sup>3</sup> /UL |                 |                     |                  |                     |
| RED BLOOD COUNT   | 4.02    | 10 <sup>6</sup> /UL | 4.02            | 10 <sup>6</sup> /UL |                 |                     |                  |                     |
| WHITE BLOOD COUNT | 4.5     | K/UL                | 4.5             | 10 <sup>3</sup> /UL |                 |                     |                  |                     |

Listing 10.2  
 Laboratory Data: Hematology

| Center            | Patient | Visit               | Assessment Date | Parameter           | Recorded Result | Recorded Units      | Converted Result | Converted Units     |
|-------------------|---------|---------------------|-----------------|---------------------|-----------------|---------------------|------------------|---------------------|
| XVO_001           | 101     | Day 14              | 24NOV2009       | ANC                 | 2.80            | K/UL                | 2.80             | 10 <sup>3</sup> /UL |
|                   |         |                     |                 | BASOPHILS           | 0.6             | %                   | 0.6              | %                   |
|                   |         |                     |                 | EOSINOPHILS         | 1.6             | %                   | 1.6              | %                   |
|                   |         |                     |                 | HEMATOCRIT(PCV)     | 37.9            | %                   | 37.9             | %                   |
|                   |         |                     |                 | HEMOGLOBIN          | 13.1            | GM/DL               | 13.1             | G/DL                |
|                   |         |                     |                 | LYMPHOCYTES         | 21.7            | %                   | 21.7             | %                   |
|                   |         |                     |                 | MCH                 | 33.3            | PG                  | 33.3             | PG                  |
|                   |         |                     |                 | MCHC                | 34.7            | GM/DL               | 34.7             | PG                  |
|                   |         |                     |                 | MCV                 | 95.9            | FL                  | 95.9             | FL                  |
|                   |         |                     |                 | MONOCYTES           | 8.4             | %                   | 8.4              | %                   |
|                   |         | PLATELETS           | 186             | K/UL                | 186             | 10 <sup>3</sup> /UL |                  |                     |
|                   |         | RED BLOOD COUNT     | 3.95            | 10 <sup>6</sup> /UL | 3.95            | 10 <sup>6</sup> /UL |                  |                     |
|                   |         | WHITE BLOOD COUNT   | 4.1             | K/UL                | 4.1             | 10 <sup>3</sup> /UL |                  |                     |
|                   |         | Day 30              | 11DEC2009       | ANC                 | 3.3             | K/UL                | 3.3              | 10 <sup>3</sup> /UL |
|                   |         |                     |                 | BASOPHILS           | 0.4             | %                   | 0.4              | %                   |
|                   |         |                     |                 | EOSINOPHILS         | 0.9             | %                   | 0.9              | %                   |
|                   |         |                     |                 | HEMATOCRIT(PCV)     | 37.8            | %                   | 37.8             | %                   |
|                   |         |                     |                 | HEMOGLOBIN          | 12.9            | G/DL                | 12.9             | G/DL                |
|                   |         |                     |                 | LYMPHOCYTES         | 23.9            | %                   | 23.9             | %                   |
|                   |         |                     |                 | MCH                 | 33.2            | PG                  | 33.2             | PG                  |
| MCHC              | 34.2    |                     |                 | GM/DL               | 34.2            | PG                  |                  |                     |
| MCV               | 97.0    |                     |                 | FL                  | 97.0            | FL                  |                  |                     |
| MONOCYTES         | 8.0     |                     |                 | %                   | 8.0             | %                   |                  |                     |
| PLATELETS         | 184     | KUL                 | 184             | 10 <sup>3</sup> /UL |                 |                     |                  |                     |
| RED BLOOD COUNT   | 3.89    | 10 <sup>6</sup> /UL | 3.89            | 10 <sup>6</sup> /UL |                 |                     |                  |                     |
| WHITE BLOOD COUNT | 5.0     | K/UL                | 5.0             | 10 <sup>3</sup> /UL |                 |                     |                  |                     |

Listing 10.2  
 Laboratory Data: Hematology

| Center            | Patient           | Visit               | Assessment Date     | Parameter           | Recorded Result     | Recorded Units | Converted Result | Converted Units     |
|-------------------|-------------------|---------------------|---------------------|---------------------|---------------------|----------------|------------------|---------------------|
| XVO_001           | 101               | Day 42              | 05JAN2010           | ANC                 | 3.0                 | K/UL           | 3.0              | 10 <sup>3</sup> /UL |
|                   |                   |                     |                     | BASOPHILS           | 0.4                 | %              | 0.4              | %                   |
|                   |                   |                     |                     | EOSINOPHILS         | 1.4                 | %              | 1.4              | %                   |
|                   |                   |                     |                     | HEMATOCRIT(PCV)     | 40.7                | %              | 40.7             | %                   |
|                   |                   |                     |                     | HEMOGLOBIN          | 13.6                | GM/DL          | 13.6             | G/DL                |
|                   |                   |                     |                     | LYMPHOCYTES         | 25.8                | %              | 25.8             | %                   |
|                   |                   |                     |                     | MCH                 | 31.8                | PG             | 31.8             | PG                  |
|                   |                   |                     |                     | MCHC                | 33.3                | GM/DL          | 33.3             | PG                  |
|                   |                   |                     |                     | MCV                 | 95.5                | FL             | 95.5             | FL                  |
|                   |                   |                     |                     | MONOCYTES           | 7.2                 | %              | 7.2              | %                   |
|                   | PLATELETS         | 192                 | K/UL                | 192                 | 10 <sup>3</sup> /UL |                |                  |                     |
|                   | RED BLOOD COUNT   | 4.26                | 10 <sup>6</sup> /UL | 4.26                | 10 <sup>6</sup> /UL |                |                  |                     |
|                   | WHITE BLOOD COUNT | 4.6                 | K/UL                | 4.6                 | 10 <sup>3</sup> /UL |                |                  |                     |
|                   | 102               | Screening           | 11DEC2009           | ANC                 | 3.5                 | K/UL           | 3.5              | 10 <sup>3</sup> /UL |
|                   |                   |                     |                     | BASOPHILS           | 0.5                 | %              | 0.5              | %                   |
|                   |                   |                     |                     | EOSINOPHILS         | 5.4                 | %              | 5.4              | %                   |
|                   |                   |                     |                     | HEMATOCRIT(PCV)     | 42.9                | %              | 42.9             | %                   |
|                   |                   |                     |                     | HEMOGLOBIN          | 13.8                | GM/DL          | 13.8             | G/DL                |
|                   |                   |                     |                     | LYMPHOCYTES         | 31.3                | %              | 31.3             | %                   |
|                   |                   |                     |                     | MCH                 | 26.6                | PG             | 26.6             | PG                  |
| MCHC              |                   |                     |                     | 32.2                | GM/DL               | 32.2           | PG               |                     |
| MCV               |                   |                     |                     | 82.6                | FL                  | 82.6           | FL               |                     |
| MONOCYTES         |                   |                     |                     | 9.9                 | %                   | 9.9            | %                |                     |
| PLATELETS         | 356               | K/UL                | 356                 | 10 <sup>3</sup> /UL |                     |                |                  |                     |
| RED BLOOD COUNT   | 5.19              | 10 <sup>6</sup> /UL | 5.19                | 10 <sup>6</sup> /UL |                     |                |                  |                     |
| WHITE BLOOD COUNT | 6.6               | K/UL                | 6.6                 | 10 <sup>3</sup> /UL |                     |                |                  |                     |

Listing 10.2  
 Laboratory Data: Hematology

| Center            | Patient | Visit               | Assessment Date | Parameter           | Recorded Result | Recorded Units      | Converted Result | Converted Units     |
|-------------------|---------|---------------------|-----------------|---------------------|-----------------|---------------------|------------------|---------------------|
| XVO_001           | 102     | Day 0 Pre-dose      | 15DEC2009       | ANC                 | 4.4             | K/UL                | 4.4              | 10 <sup>3</sup> /UL |
|                   |         |                     |                 | BASOPHILS           | 0.5             | %                   | 0.5              | %                   |
|                   |         |                     |                 | EOSINOPHILS         | 4.2             | %                   | 4.2              | %                   |
|                   |         |                     |                 | HEMATOCRIT(PCV)     | 43.2            | %                   | 43.2             | %                   |
|                   |         |                     |                 | HEMOGLOBIN          | 14.0            | GM/DL               | 14.0             | G/DL                |
|                   |         |                     |                 | LYMPHOCYTES         | 24.2            | %                   | 24.2             | %                   |
|                   |         |                     |                 | MCH                 | 27.0            | PG                  | 27.0             | PG                  |
|                   |         |                     |                 | MCHC                | 32.5            | GM/DL               | 32.5             | PG                  |
|                   |         |                     |                 | MCV                 | 83.2            | FL                  | 83.2             | FL                  |
|                   |         |                     |                 | MONOCYTES           | 9.7             | %                   | 9.7              | %                   |
|                   |         | PLATELETS           | 375             | K/UL                | 375             | 10 <sup>3</sup> /UL |                  |                     |
|                   |         | RED BLOOD COUNT     | 5.18            | 10 <sup>6</sup> /UL | 5.18            | 10 <sup>6</sup> /UL |                  |                     |
|                   |         | WHITE BLOOD COUNT   | 7.2             | K/UL                | 7.2             | 10 <sup>3</sup> /UL |                  |                     |
|                   |         | Day 6               | 21DEC2009       | ANC                 | 4.9             | K/UL                | 4.9              | 10 <sup>3</sup> /UL |
|                   |         |                     |                 | BASOPHILS           | 0.7             | %                   | 0.7              | %                   |
|                   |         |                     |                 | EOSINOPHILS         | 3.8             | %                   | 3.8              | %                   |
|                   |         |                     |                 | HEMATOCRIT(PCV)     | 41.0            | %                   | 41.0             | %                   |
|                   |         |                     |                 | HEMOGLOBIN          | 13.4            | GM/DL               | 13.4             | G/DL                |
|                   |         |                     |                 | LYMPHOCYTES         | 22.9            | %                   | 22.9             | %                   |
|                   |         |                     |                 | MCH                 | 27.1            | PG                  | 27.1             | PG                  |
| MCHC              | 32.6    |                     |                 | GM/DL               | 32.6            | PG                  |                  |                     |
| MCV               | 83.3    |                     |                 | FL                  | 83.3            | FL                  |                  |                     |
| MONOCYTES         | 10.2    |                     |                 | %                   | 10.2            | %                   |                  |                     |
| PLATELETS         | 375     | K/UL                | 375             | 10 <sup>3</sup> /UL |                 |                     |                  |                     |
| RED BLOOD COUNT   | 4.93    | 10 <sup>6</sup> /UL | 4.93            | 10 <sup>6</sup> /UL |                 |                     |                  |                     |
| WHITE BLOOD COUNT | 7.8     | K/UL                | 7.8             | 10 <sup>3</sup> /UL |                 |                     |                  |                     |

Listing 10.2  
 Laboratory Data: Hematology

| Center            | Patient | Visit               | Assessment Date | Parameter           | Recorded Result | Recorded Units      | Converted Result | Converted Units     |
|-------------------|---------|---------------------|-----------------|---------------------|-----------------|---------------------|------------------|---------------------|
| XVO_001           | 102     | Day 14              | 29DEC2009       | ANC                 | 3.5             | K/UL                | 3.5              | 10 <sup>3</sup> /UL |
|                   |         |                     |                 | BASOPHILS           | 0.5             | %                   | 0.5              | %                   |
|                   |         |                     |                 | EOSINOPHILS         | 6.0             | %                   | 6.0              | %                   |
|                   |         |                     |                 | HEMATOCRIT(PCV)     | 42.0            | %                   | 42.0             | %                   |
|                   |         |                     |                 | HEMOGLOBIN          | 13.2            | GM/DL               | 13.2             | G/DL                |
|                   |         |                     |                 | LYMPHOCYTES         | 27.7            | %                   | 27.7             | %                   |
|                   |         |                     |                 | MCH                 | 25.8            | PG                  | 25.8             | PG                  |
|                   |         |                     |                 | MCHC                | 31.5            | GM/DL               | 31.5             | PG                  |
|                   |         |                     |                 | MCV                 | 81.8            | FL                  | 81.8             | FL                  |
|                   |         |                     |                 | MONOCYTES           | 9.2             | %                   | 9.2              | %                   |
|                   |         | PLATELETS           | 361             | K/UL                | 361             | 10 <sup>3</sup> /UL |                  |                     |
|                   |         | RED BLOOD COUNT     | 5.14            | 10 <sup>6</sup> /UL | 5.14            | 10 <sup>6</sup> /UL |                  |                     |
|                   |         | WHITE BLOOD COUNT   | 6.2             | K/UL                | 6.2             | 10 <sup>3</sup> /UL |                  |                     |
|                   |         | Day 30              | 15JAN2010       | ANC                 | 3.7             | K/UL                | 3.7              | 10 <sup>3</sup> /UL |
|                   |         |                     |                 | BASOPHILS           | 0.4             | %                   | 0.4              | %                   |
|                   |         |                     |                 | EOSINOPHILS         | 3.6             | %                   | 3.6              | %                   |
|                   |         |                     |                 | HEMATOCRIT(PCV)     | 43.0            | %                   | 43.0             | %                   |
|                   |         |                     |                 | HEMOGLOBIN          | 13.6            | GM/DL               | 13.6             | G/DL                |
|                   |         |                     |                 | LYMPHOCYTES         | 27.2            | %                   | 27.2             | %                   |
|                   |         |                     |                 | MCH                 | 26.0            | PG                  | 26.0             | PG                  |
| MCHC              | 31.7    |                     |                 | GM/DL               | 31.7            | PG                  |                  |                     |
| MCV               | 82.0    |                     |                 | FL                  | 82.0            | FL                  |                  |                     |
| MONOCYTES         | 8.3     |                     |                 | %                   | 8.3             | %                   |                  |                     |
| PLATELETS         | 303     | K/UL                | 303             | 10 <sup>3</sup> /UL |                 |                     |                  |                     |
| RED BLOOD COUNT   | 5.24    | 10 <sup>6</sup> /UL | 5.24            | 10 <sup>6</sup> /UL |                 |                     |                  |                     |
| WHITE BLOOD COUNT | 6.1     | K/UL                | 6.1             | 10 <sup>3</sup> /UL |                 |                     |                  |                     |

Listing 10.2  
 Laboratory Data: Hematology

| Center            | Patient           | Visit               | Assessment Date     | Parameter           | Recorded Result     | Recorded Units | Converted Result | Converted Units     |
|-------------------|-------------------|---------------------|---------------------|---------------------|---------------------|----------------|------------------|---------------------|
| XVO_001           | 102               | Day 42              | 29JAN2010           | ANC                 | 3.5                 | K/UL           | 3.5              | 10 <sup>3</sup> /UL |
|                   |                   |                     |                     | BASOPHILS           | 0.7                 | %              | 0.7              | %                   |
|                   |                   |                     |                     | EOSINOPHILS         | 3.6                 | %              | 3.6              | %                   |
|                   |                   |                     |                     | HEMATOCRIT(PCV)     | 43.8                | %              | 43.8             | %                   |
|                   |                   |                     |                     | HEMOGLOBIN          | 13.8                | GM/DL          | 13.8             | G/DL                |
|                   |                   |                     |                     | LYMPHOCYTES         | 28.5                | %              | 28.5             | %                   |
|                   |                   |                     |                     | MCH                 | 26.0                | PG             | 26.0             | PG                  |
|                   |                   |                     |                     | MCHC                | 31.6                | GM/DL          | 31.6             | PG                  |
|                   |                   |                     |                     | MCV                 | 82.3                | FL             | 82.3             | FL                  |
|                   |                   |                     |                     | MONOCYTES           | 8.4                 | %              | 8.4              | %                   |
|                   | PLATELETS         | 289                 | K/UL                | 289                 | 10 <sup>3</sup> /UL |                |                  |                     |
|                   | RED BLOOD COUNT   | 5.33                | 10 <sup>6</sup> /UL | 5.33                | 10 <sup>6</sup> /UL |                |                  |                     |
|                   | WHITE BLOOD COUNT | 5.9                 | K/UL                | 5.9                 | 10 <sup>3</sup> /UL |                |                  |                     |
|                   | 103               | Screening           | 11JAN2010           | ANC                 | 4.1                 | K/UL           | 4.1              | 10 <sup>3</sup> /UL |
|                   |                   |                     |                     | BASOPHILS           | 1.5                 | %              | 1.5              | %                   |
|                   |                   |                     |                     | EOSINOPHILS         | 4.7                 | %              | 4.7              | %                   |
|                   |                   |                     |                     | HEMATOCRIT(PCV)     | 42.8                | %              | 42.8             | %                   |
|                   |                   |                     |                     | HEMOGLOBIN          | 15.0                | GM/DL          | 15.0             | G/DL                |
|                   |                   |                     |                     | LYMPHOCYTES         | 33.1                | %              | 33.1             | %                   |
|                   |                   |                     |                     | MCH                 | 32.6                | PG             | 32.6             | PG                  |
| MCHC              |                   |                     |                     | 35.1                | GM/DL               | 35.1           | PG               |                     |
| MCV               |                   |                     |                     | 92.8                | FL                  | 92.8           | FL               |                     |
| MONOCYTES         |                   |                     |                     | 10.5                | %                   | 10.5           | %                |                     |
| PLATELETS         | 277               | K/UL                | 277                 | 10 <sup>3</sup> /UL |                     |                |                  |                     |
| RED BLOOD COUNT   | 4.61              | 10 <sup>6</sup> /UL | 4.61                | 10 <sup>6</sup> /UL |                     |                |                  |                     |
| WHITE BLOOD COUNT | 8.2               | K/UL                | 8.2                 | 10 <sup>3</sup> /UL |                     |                |                  |                     |

Listing 10.2  
 Laboratory Data: Hematology

| Center            | Patient | Visit               | Assessment Date | Parameter           | Recorded Result | Recorded Units      | Converted Result | Converted Units     |
|-------------------|---------|---------------------|-----------------|---------------------|-----------------|---------------------|------------------|---------------------|
| XVO_001           | 103     | Day 6               | 19JAN2010       | ANC                 | 4.2             | K/UL                | 4.2              | 10 <sup>3</sup> /UL |
|                   |         |                     |                 | BASOPHILS           | 1.4             | %                   | 1.4              | %                   |
|                   |         |                     |                 | EOSINOPHILS         | 4.8             | %                   | 4.8              | %                   |
|                   |         |                     |                 | HEMATOCRIT(PCV)     | 44.5            | %                   | 44.5             | %                   |
|                   |         |                     |                 | HEMOGLOBIN          | 14.8            | GM/DL               | 14.8             | G/DL                |
|                   |         |                     |                 | LYMPHOCYTES         | 29.9            | %                   | 29.9             | %                   |
|                   |         |                     |                 | MCH                 | 31.1            | PG                  | 31.1             | PG                  |
|                   |         |                     |                 | MCHC                | 33.3            | GM/DL               | 33.3             | PG                  |
|                   |         |                     |                 | MCV                 | 93.4            | FL                  | 93.4             | FL                  |
|                   |         |                     |                 | MONOCYTES           | 8.0             | %                   | 8.0              | %                   |
|                   |         | PLATELETS           | 297             | K/UL                | 297             | 10 <sup>3</sup> /UL |                  |                     |
|                   |         | RED BLOOD COUNT     | 4.76            | 10 <sup>6</sup> /UL | 4.76            | 10 <sup>6</sup> /UL |                  |                     |
|                   |         | WHITE BLOOD COUNT   | 7.6             | K/UL                | 7.6             | 10 <sup>3</sup> /UL |                  |                     |
|                   |         | Day 14              | 26JAN2010       | ANC                 | 4.1             | K/UL                | 4.1              | 10 <sup>3</sup> /UL |
|                   |         |                     |                 | BASOPHILS           | 0.6             | %                   | 0.6              | %                   |
|                   |         |                     |                 | EOSINOPHILS         | 4.3             | %                   | 4.3              | %                   |
|                   |         |                     |                 | HEMATOCRIT(PCV)     | 42.5            | %                   | 42.5             | %                   |
|                   |         |                     |                 | HEMOGLOBIN          | 14.2            | GM/DL               | 14.2             | G/DL                |
|                   |         |                     |                 | LYMPHOCYTES         | 27.6            | %                   | 27.6             | %                   |
|                   |         |                     |                 | MCH                 | 31.4            | PG                  | 31.4             | PG                  |
| MCHC              | 33.5    |                     |                 | GM/DL               | 33.5            | PG                  |                  |                     |
| MCV               | 93.9    |                     |                 | FL                  | 93.9            | FL                  |                  |                     |
| MONOCYTES         | 9.8     |                     |                 | %                   | 9.8             | %                   |                  |                     |
| PLATELETS         | 293     | K/UL                | 293             | 10 <sup>3</sup> /UL |                 |                     |                  |                     |
| RED BLOOD COUNT   | 4.53    | 10 <sup>6</sup> /UL | 4.53            | 10 <sup>6</sup> /UL |                 |                     |                  |                     |
| WHITE BLOOD COUNT | 7.2     | K/UL                | 7.2             | 10 <sup>3</sup> /UL |                 |                     |                  |                     |

Listing 10.2  
 Laboratory Data: Hematology

| Center            | Patient | Visit               | Assessment Date | Parameter           | Recorded Result | Recorded Units      | Converted Result | Converted Units     |
|-------------------|---------|---------------------|-----------------|---------------------|-----------------|---------------------|------------------|---------------------|
| XVO_001           | 103     | Day 30              | 09FEB2010       | ANC                 | 4.3             | K/UL                | 4.3              | 10 <sup>3</sup> /UL |
|                   |         |                     |                 | BASOPHILS           | 1.4             | %                   | 1.4              | %                   |
|                   |         |                     |                 | EOSINOPHILS         | 5.7             | %                   | 5.7              | %                   |
|                   |         |                     |                 | HEMATOCRIT(PCV)     | 44.9            | %                   | 44.9             | %                   |
|                   |         |                     |                 | HEMOGLOBIN          | 14.6            | GM/DL               | 14.6             | G/DL                |
|                   |         |                     |                 | LYMPHOCYTES         | 31.4            | %                   | 31.4             | %                   |
|                   |         |                     |                 | MCH                 | 30.8            | PG                  | 30.8             | PG                  |
|                   |         |                     |                 | MCHC                | 32.6            | GM/DL               | 32.6             | PG                  |
|                   |         |                     |                 | MCV                 | 94.5            | FL                  | 94.5             | FL                  |
|                   |         |                     |                 | MONOCYTES           | 10.6            | %                   | 10.6             | %                   |
|                   |         |                     |                 | PLATELETS           | 261             | K/UL                | 261              | 10 <sup>3</sup> /UL |
|                   |         |                     |                 | RED BLOOD COUNT     | 4.74            | 10 <sup>6</sup> /UL | 4.74             | 10 <sup>6</sup> /UL |
|                   |         | WHITE BLOOD COUNT   | 8.4             | K/UL                | 8.4             | 10 <sup>3</sup> /UL |                  |                     |
|                   |         | Day 42              | 19FEB2010       | ANC                 | 3.5             | K/UL                | 3.5              | 10 <sup>3</sup> /UL |
|                   |         |                     |                 | BASOPHILS           | 1.4             | %                   | 1.4              | %                   |
|                   |         |                     |                 | EOSINOPHILS         | 6.9             | %                   | 6.9              | %                   |
|                   |         |                     |                 | HEMATOCRIT(PCV)     | 44.0            | %                   | 44.0             | %                   |
|                   |         |                     |                 | HEMOGLOBIN          | 14.6            | GM/DL               | 14.6             | G/DL                |
|                   |         |                     |                 | LYMPHOCYTES         | 26.5            | %                   | 26.5             | %                   |
|                   |         |                     |                 | MCH                 | 31.6            | PG                  | 31.6             | PG                  |
|                   |         |                     |                 | MCHC                | 33.2            | GM/DL               | 33.2             | PG                  |
| MCV               | 95.2    |                     |                 | FL                  | 95.2            | FL                  |                  |                     |
| MONOCYTES         | 8.3     | %                   | 8.3             | %                   |                 |                     |                  |                     |
| PLATELETS         | 226     | K/UL                | 226             | 10 <sup>3</sup> /UL |                 |                     |                  |                     |
| RED BLOOD COUNT   | 4.62    | 10 <sup>6</sup> /UL | 4.62            | 10 <sup>6</sup> /UL |                 |                     |                  |                     |
| WHITE BLOOD COUNT | 6.1     | K/UL                | 6.1             | 10 <sup>3</sup> /UL |                 |                     |                  |                     |



Listing 10.2  
 Laboratory Data: Hematology

| Center            | Patient | Visit             | Assessment Date | Parameter              | Recorded Result | Recorded Units      | Converted Result | Converted Units     |
|-------------------|---------|-------------------|-----------------|------------------------|-----------------|---------------------|------------------|---------------------|
| XVO_003           | 201     | Screening         | 10NOV2009       | ANC                    | 4350            | /CU MM              | 4.35             | 10 <sup>3</sup> /UL |
|                   |         |                   |                 | BASOPHILS              | 0.9             | %                   | 0.9              | %                   |
|                   |         |                   |                 | EOSINOPHILS            | 0.9             | %                   | 0.9              | %                   |
|                   |         |                   |                 | HEMATOCRIT(PCV)        | 38.1            | %                   | 38.1             | %                   |
|                   |         |                   |                 | HEMOGLOBIN             | 12.6            | G/DL                | 12.6             | G/DL                |
|                   |         |                   |                 | LYMPHOCYTES            | 19.0            | %                   | 19.0             | %                   |
|                   |         |                   |                 | MCH                    | 28.1            | PG                  | 28.1             | PG                  |
|                   |         |                   |                 | MCHC                   | 33.1            | G/DL                | 33.1             | PG                  |
|                   |         |                   |                 | MCV                    | 84.9            | FL                  | 84.9             | FL                  |
|                   |         |                   |                 | MONOCYTES              | 15.7            | %                   | 15.7             | %                   |
|                   |         | PLATELETS         | 280             | 10 <sup>3</sup> /CU MM | 280             | 10 <sup>3</sup> /UL |                  |                     |
|                   |         | RED BLOOD COUNT   | 4.49            | 10 <sup>6</sup> /CU MM | 4.49            | 10 <sup>6</sup> /UL |                  |                     |
|                   |         | WHITE BLOOD COUNT | 6860            | /CU MM                 | 6.86            | 10 <sup>3</sup> /UL |                  |                     |
|                   |         | Day 0 Pre-dose    | 17NOV2009       | ANC                    | 3440            | /CU MM              | 3.44             | 10 <sup>3</sup> /UL |
|                   |         |                   |                 | BASOPHILS              | 0.8             | %                   | 0.8              | %                   |
|                   |         |                   |                 | EOSINOPHILS            | 4.2             | %                   | 4.2              | %                   |
|                   |         |                   |                 | HEMATOCRIT(PCV)        | 36.3            | %                   | 36.3             | %                   |
|                   |         |                   |                 | HEMOGLOBIN             | 12.1            | G/DL                | 12.1             | G/DL                |
|                   |         |                   |                 | LYMPHOCYTES            | 20.7            | %                   | 20.7             | %                   |
|                   |         |                   |                 | MCH                    | 28.2            | PG                  | 28.2             | PG                  |
| MCHC              | 33.3    |                   |                 | G/DL                   | 33.3            | PG                  |                  |                     |
| MCV               | 84.6    |                   |                 | FL                     | 84.6            | FL                  |                  |                     |
| MONOCYTES         | 15.6    |                   |                 | %                      | 15.6            | %                   |                  |                     |
| PLATELETS         | 282     | K/CU MM           | 282             | 10 <sup>3</sup> /UL    |                 |                     |                  |                     |
| RED BLOOD COUNT   | 4.29    | M/CU MM           | 4.29            | 10 <sup>6</sup> /UL    |                 |                     |                  |                     |
| WHITE BLOOD COUNT | 5890    | /CU MM            | 5.89            | 10 <sup>3</sup> /UL    |                 |                     |                  |                     |

Listing 10.2  
 Laboratory Data: Hematology

| Center            | Patient | Visit                | Assessment Date | Parameter           | Recorded Result | Recorded Units | Converted Result | Converted Units     |
|-------------------|---------|----------------------|-----------------|---------------------|-----------------|----------------|------------------|---------------------|
| XVO_003           | 201     | Day 6                | 23NOV2009       | ANC                 | 6490            | /CU MM         | 6.49             | 10 <sup>3</sup> /UL |
|                   |         |                      |                 | BASOPHILS           | 0.4             | %              | 0.4              | %                   |
|                   |         |                      |                 | EOSINOPHILS         | 1.1             | %              | 1.1              | %                   |
|                   |         |                      |                 | HEMATOCRIT(PCV)     | 35.9            | %              | 35.9             | %                   |
|                   |         |                      |                 | HEMOGLOBIN          | 12.2            | G/DL           | 12.2             | G/DL                |
|                   |         |                      |                 | LYMPHOCYTES         | 7.3             | %              | 7.3              | %                   |
|                   |         |                      |                 | MCH                 | 28.8            | PG             | 28.8             | PG                  |
|                   |         |                      |                 | MCHC                | 34.0            | G/DL           | 34.0             | PG                  |
|                   |         |                      |                 | MCV                 | 84.7            | FL             | 84.7             | FL                  |
|                   |         |                      |                 | MONOCYTES           | 13.6            | %              | 13.6             | %                   |
|                   |         |                      |                 | PLATELETS           | 272             | K/CU MM        | 272              | 10 <sup>3</sup> /UL |
|                   |         |                      |                 | RED BLOOD COUNT     | 4.24            | M/CU MM        | 4.24             | 10 <sup>6</sup> /UL |
|                   |         |                      |                 | WHITE BLOOD COUNT   | 8390            | /CU MM         | 8.39             | 10 <sup>3</sup> /UL |
|                   |         | Day 14               | 02DEC2009       | ANC                 | 3360            | /CU MM         | 3.36             | 10 <sup>3</sup> /UL |
|                   |         |                      |                 | BASOPHILS           | 1.0             | %              | 1.0              | %                   |
|                   |         |                      |                 | EOSINOPHILS         | 2.9             | %              | 2.9              | %                   |
|                   |         |                      |                 | HEMATOCRIT(PCV)     | 34.6            | %              | 34.6             | %                   |
|                   |         |                      |                 | HEMOGLOBIN          | 11.6            | G/DL           | 11.6             | G/DL                |
|                   |         |                      |                 | LYMPHOCYTES         | 14.8            | %              | 14.8             | %                   |
|                   |         |                      |                 | MCH                 | 28.7            | PG             | 28.7             | PG                  |
|                   |         |                      |                 | MCHC                | 33.5            | G/DL           | 33.5             | PG                  |
| MCV               | 85.6    | FL                   | 85.6            | FL                  |                 |                |                  |                     |
| MONOCYTES         | 24.5    | %                    | 24.5            | %                   |                 |                |                  |                     |
| PLATELETS         | 317     | K/CU MM              | 317             | 10 <sup>3</sup> /UL |                 |                |                  |                     |
| RED BLOOD COUNT   | 4.04    | M/CU MM <sup>3</sup> | 4.04            | 10 <sup>6</sup> /UL |                 |                |                  |                     |
| WHITE BLOOD COUNT | 5960    | /CU MM               | 5.96            | 10 <sup>3</sup> /UL |                 |                |                  |                     |

Listing 10.2  
 Laboratory Data: Hematology

| Center            | Patient | Visit             | Assessment Date | Parameter           | Recorded Result | Recorded Units      | Converted Result | Converted Units     |
|-------------------|---------|-------------------|-----------------|---------------------|-----------------|---------------------|------------------|---------------------|
| XVO_003           | 201     | Day 30            | 22DEC2009       | ANC                 | 3120            | /CU MM              | 3.12             | 10 <sup>3</sup> /UL |
|                   |         |                   |                 | BASOPHILS           | 1.4             | %                   | 1.4              | %                   |
|                   |         |                   |                 | EOSINOPHILS         | 2.8             | %                   | 2.8              | %                   |
|                   |         |                   |                 | HEMATOCRIT(PCV)     | 38.2            | %                   | 38.2             | %                   |
|                   |         |                   |                 | HEMOGLOBIN          | 12.7            | G/DL                | 12.7             | G/DL                |
|                   |         |                   |                 | LYMPHOCYTES         | 15.7            | %                   | 15.7             | %                   |
|                   |         |                   |                 | MCH                 | 28.3            | PG                  | 28.3             | PG                  |
|                   |         |                   |                 | MCHC                | 33.2            | G/DL                | 33.2             | PG                  |
|                   |         |                   |                 | MCV                 | 85.1            | FL                  | 85.1             | FL                  |
|                   |         |                   |                 | MONOCYTES           | 18.5            | %                   | 18.5             | %                   |
|                   |         | PLATELETS         | 232             | K/CU MM             | 232             | 10 <sup>3</sup> /UL |                  |                     |
|                   |         | RED BLOOD COUNT   | 4.49            | M/CU MM             | 4.49            | 10 <sup>6</sup> /UL |                  |                     |
|                   |         | WHITE BLOOD COUNT | 5090            | /CU MM              | 5.09            | 10 <sup>3</sup> /UL |                  |                     |
|                   |         | Day 42            | 29DEC2009       | ANC                 | 5380            | /CU MM              | 5.38             | 10 <sup>3</sup> /UL |
|                   |         |                   |                 | BASOPHILS           | 0.7             | %                   | 0.7              | %                   |
|                   |         |                   |                 | EOSINOPHILS         | 1.3             | %                   | 1.3              | %                   |
|                   |         |                   |                 | HEMATOCRIT(PCV)     | 37.3            | %                   | 37.3             | %                   |
|                   |         |                   |                 | HEMOGLOBIN          | 12.5            | G/DL                | 12.5             | G/DL                |
|                   |         |                   |                 | LYMPHOCYTES         | 10.8            | %                   | 10.8             | %                   |
|                   |         |                   |                 | MCH                 | 28.3            | PG                  | 28.3             | PG                  |
| MCHC              | 33.5    |                   |                 | G/DL                | 33.5            | PG                  |                  |                     |
| MCV               | 84.4    |                   |                 | FL                  | 84.4            | FL                  |                  |                     |
| MONOCYTES         | 10.7    |                   |                 | %                   | 10.7            | %                   |                  |                     |
| PLATELETS         | 228     | K/CU MM           | 228             | 10 <sup>3</sup> /UL |                 |                     |                  |                     |
| RED BLOOD COUNT   | 4.42    | M/CU MM           | 4.42            | 10 <sup>6</sup> /UL |                 |                     |                  |                     |
| WHITE BLOOD COUNT | 7040    | /CU MM            | 7.04            | 10 <sup>3</sup> /UL |                 |                     |                  |                     |

Listing 10.2  
 Laboratory Data: Hematology

| Center            | Patient | Visit             | Assessment Date | Parameter           | Recorded Result | Recorded Units    | Converted Result | Converted Units     |
|-------------------|---------|-------------------|-----------------|---------------------|-----------------|-------------------|------------------|---------------------|
| XVO_005           | 301     | Screening         | 03AUG2009       | ANC                 | 4.7             | X10 <sup>9</sup>  | 4.7              | 10 <sup>3</sup> /UL |
|                   |         |                   |                 | BASOPHILS           | 0.6             | %                 | 0.6              | %                   |
|                   |         |                   |                 | EOSINOPHILS         | 6.0             | %                 | 6.0              | %                   |
|                   |         |                   |                 | HEMATOCRIT(PCV)     | 0.40            | L/L               | 40               | %                   |
|                   |         |                   |                 | HEMOGLOBIN          | 13.7            | G/DL              | 13.7             | G/DL                |
|                   |         |                   |                 | LYMPHOCYTES         | 19.7            | %                 | 19.7             | %                   |
|                   |         |                   |                 | MCH                 | 29.3            | PG                | 29.3             | PG                  |
|                   |         |                   |                 | MCHC                | 33.9            | %                 | 33.9             | PG                  |
|                   |         |                   |                 | MCV                 | 86              | FL                | 86               | FL                  |
|                   |         |                   |                 | MONOCYTES           | 7.0             | %                 | 7.0              | %                   |
|                   |         |                   |                 | PLATELETS           | 185             | X10 <sup>9</sup>  | 185              | 10 <sup>3</sup> /UL |
|                   |         |                   |                 | RED BLOOD COUNT     | 4.68            | X10 <sup>12</sup> | 4.68             | 10 <sup>6</sup> /UL |
|                   |         |                   |                 | WHITE BLOOD COUNT   | 7.0             | X10 <sup>9</sup>  | 7.0              | 10 <sup>3</sup> /UL |
|                   |         |                   |                 | Day 0 Pre-dose      | 04AUG2009       | ANC               | 4.5              | X10 <sup>9</sup>    |
|                   |         | BASOPHILS         | 0.5             |                     |                 | %                 | 0.5              | %                   |
|                   |         | EOSINOPHILS       | 6.8             |                     |                 | %                 | 6.8              | %                   |
|                   |         | HEMATOCRIT(PCV)   | 0.4             |                     |                 | L/L               | 40               | %                   |
|                   |         | HEMOGLOBIN        | 13.8            |                     |                 | G/DL              | 13.8             | G/DL                |
|                   |         | LYMPHOCYTES       | 15.5            |                     |                 | %                 | 15.5             | %                   |
|                   |         | MCH               | 29              |                     |                 | PG                | 29               | PG                  |
|                   |         | MCHC              | 34.5            | %                   | 34.5            | PG                |                  |                     |
| MCV               | 84      | FL                | 84              | FL                  |                 |                   |                  |                     |
| MONOCYTES         | 7.7     | %                 | 7.7             | %                   |                 |                   |                  |                     |
| PLATELETS         | 169     | X10 <sup>9</sup>  | 169             | 10 <sup>3</sup> /UL |                 |                   |                  |                     |
| RED BLOOD COUNT   | 4.76    | X10 <sup>12</sup> | 4.76            | 10 <sup>6</sup> /UL |                 |                   |                  |                     |
| WHITE BLOOD COUNT | 6.5     | X10 <sup>9</sup>  | 6.5             | 10 <sup>3</sup> /UL |                 |                   |                  |                     |

Listing 10.2  
 Laboratory Data: Hematology

| Center            | Patient | Visit             | Assessment Date | Parameter           | Recorded Result | Recorded Units      | Converted Result | Converted Units     |
|-------------------|---------|-------------------|-----------------|---------------------|-----------------|---------------------|------------------|---------------------|
| XVO_005           | 301     | Day 6             | 10AUG2009       | ANC                 | 6.2             | X10 <sup>9</sup>    | 6.2              | 10 <sup>3</sup> /UL |
|                   |         |                   |                 | BASOPHILS           | 0.5             | %                   | 0.5              | %                   |
|                   |         |                   |                 | EOSINOPHILS         | 6.2             | %                   | 6.2              | %                   |
|                   |         |                   |                 | HEMATOCRIT(PCV)     | 0.42            | L/L                 | 42               | %                   |
|                   |         |                   |                 | HEMOGLOBIN          | 13.8            | G/DL                | 13.8             | G/DL                |
|                   |         |                   |                 | LYMPHOCYTES         | 12.6            | %                   | 12.6             | %                   |
|                   |         |                   |                 | MCH                 | 28.7            | PG                  | 28.7             | PG                  |
|                   |         |                   |                 | MCHC                | 33.1            | %                   | 33.1             | PG                  |
|                   |         |                   |                 | MCV                 | 87              | FL                  | 87               | FL                  |
|                   |         |                   |                 | MONOCYTES           | 7.3             | %                   | 7.3              | %                   |
|                   |         |                   |                 | PLATELETS           | 197             | X10 <sup>9</sup>    | 197              | 10 <sup>3</sup> /UL |
|                   |         |                   |                 | RED BLOOD COUNT     | 4.81            | X10 <sup>12</sup>   | 4.81             | 10 <sup>6</sup> /UL |
|                   |         | WHITE BLOOD COUNT | 8.5             | X10 <sup>9</sup>    | 8.5             | 10 <sup>3</sup> /UL |                  |                     |
|                   |         | Day 14            | 18AUG2009       | ANC                 | 5.2             | X10 <sup>9</sup>    | 5.2              | 10 <sup>3</sup> /UL |
|                   |         |                   |                 | BASOPHILS           | 0.7             | %                   | 0.7              | %                   |
|                   |         |                   |                 | EOSINOPHILS         | 6.2             | %                   | 6.2              | %                   |
|                   |         |                   |                 | HEMATOCRIT(PCV)     | 0.40            | L/L                 | 40               | %                   |
|                   |         |                   |                 | HEMOGLOBIN          | 13.5            | G/DL                | 13.5             | G/DL                |
|                   |         |                   |                 | LYMPHOCYTES         | 15.1            | %                   | 15.1             | %                   |
|                   |         |                   |                 | MCH                 | 29.1            | PG                  | 29.1             | PG                  |
|                   |         |                   |                 | MCHC                | 33.7            | %                   | 33.7             | PG                  |
| MCV               | 86      |                   |                 | FL                  | 86              | FL                  |                  |                     |
| MONOCYTES         | 7.4     | %                 | 7.4             | %                   |                 |                     |                  |                     |
| PLATELETS         | 190     | X10 <sup>9</sup>  | 190             | 10 <sup>3</sup> /UL |                 |                     |                  |                     |
| RED BLOOD COUNT   | 4.64    | X10 <sup>12</sup> | 4.64            | 10 <sup>6</sup> /UL |                 |                     |                  |                     |
| WHITE BLOOD COUNT | 7.4     | X10 <sup>9</sup>  | 7.4             | 10 <sup>3</sup> /UL |                 |                     |                  |                     |

Listing 10.2  
 Laboratory Data: Hematology

| Center            | Patient | Visit             | Assessment Date | Parameter         | Recorded Result | Recorded Units    | Converted Result | Converted Units     |      |                  |      |                     |
|-------------------|---------|-------------------|-----------------|-------------------|-----------------|-------------------|------------------|---------------------|------|------------------|------|---------------------|
| XVO_005           | 301     | Day 42            | 15SEP2009       | ANC               | 5.6             | X10 <sup>9</sup>  | 5.6              | 10 <sup>3</sup> /UL |      |                  |      |                     |
|                   |         |                   |                 | BASOPHILS         | 0.3             | %                 | 0.3              | %                   |      |                  |      |                     |
|                   |         |                   |                 | EOSINOPHILS       | 6.2             | %                 | 6.2              | %                   |      |                  |      |                     |
|                   |         |                   |                 | HEMATOCRIT(PCV)   | 0.40            | L/L               | 40               | %                   |      |                  |      |                     |
|                   |         |                   |                 | HEMOGLOBIN        | 13.6            | G/DL              | 13.6             | G/DL                |      |                  |      |                     |
|                   |         |                   |                 | LYMPHOCYTES       | 15.4            | %                 | 15.4             | %                   |      |                  |      |                     |
|                   |         |                   |                 | MCH               | 29.4            | PG                | 29.4             | PG                  |      |                  |      |                     |
|                   |         |                   |                 | MCHC              | 34.2            | %                 | 34.2             | PG                  |      |                  |      |                     |
|                   |         |                   |                 | MCV               | 86              | FL                | 86               | FL                  |      |                  |      |                     |
|                   |         |                   |                 | MONOCYTES         | 7.6             | %                 | 7.6              | %                   |      |                  |      |                     |
|                   |         |                   |                 | PLATELETS         | 210             | X10 <sup>9</sup>  | 210              | 10 <sup>3</sup> /UL |      |                  |      |                     |
|                   |         |                   |                 | RED BLOOD COUNT   | 4.62            | X10 <sup>12</sup> | 4.62             | 10 <sup>6</sup> /UL |      |                  |      |                     |
|                   |         |                   |                 | WHITE BLOOD COUNT | 7.9             | X10 <sup>9</sup>  | 7.9              | 10 <sup>3</sup> /UL |      |                  |      |                     |
|                   |         |                   |                 |                   | 302             | Screening         | 14DEC2009        | ANC                 | 7    | X10 <sup>9</sup> | 7    | 10 <sup>3</sup> /UL |
|                   |         |                   |                 |                   |                 |                   |                  | BASOPHILS           | 0.4  | %                | 0.4  | %                   |
|                   |         |                   |                 |                   |                 |                   |                  | EOSINOPHILS         | 6.9  | %                | 6.9  | %                   |
|                   |         |                   |                 |                   |                 |                   |                  | HEMATOCRIT(PCV)     | 0.36 | L/L              | 36   | %                   |
|                   |         |                   |                 |                   |                 |                   |                  | HEMOGLOBIN          | 12   | G/DL             | 12   | G/DL                |
|                   |         |                   |                 |                   |                 |                   |                  | LYMPHOCYTES         | 20.5 | %                | 20.5 | %                   |
| MCH               | 30.2    | PG                | 30.2            |                   |                 |                   |                  | PG                  |      |                  |      |                     |
| MCHC              | 33      | %                 | 33              |                   |                 |                   |                  | PG                  |      |                  |      |                     |
| MCV               | 92      | FL                | 92              |                   |                 |                   |                  | FL                  |      |                  |      |                     |
| MONOCYTES         | 6.2     | %                 | 6.2             |                   |                 |                   |                  | %                   |      |                  |      |                     |
| PLATELETS         | 266     | X10 <sup>9</sup>  | 266             |                   |                 |                   |                  | 10 <sup>3</sup> /UL |      |                  |      |                     |
| RED BLOOD COUNT   | 3.97    | X10 <sup>12</sup> | 3.97            |                   |                 |                   |                  | 10 <sup>6</sup> /UL |      |                  |      |                     |
| WHITE BLOOD COUNT | 10.7    | X10 <sup>9</sup>  | 10.7            |                   |                 |                   |                  | 10 <sup>3</sup> /UL |      |                  |      |                     |

Listing 10.2  
 Laboratory Data: Hematology

| Center            | Patient | Visit             | Assessment Date | Parameter           | Recorded Result | Recorded Units      | Converted Result | Converted Units     |
|-------------------|---------|-------------------|-----------------|---------------------|-----------------|---------------------|------------------|---------------------|
| XVO_005           | 302     | Day 0 Pre-dose    | 15DEC2009       | ANC                 | 8.7             | X10 <sup>9</sup>    | 8.7              | 10 <sup>3</sup> /UL |
|                   |         |                   |                 | BASOPHILS           | 0.3             | %                   | 0.3              | %                   |
|                   |         |                   |                 | EOSINOPHILS         | 6.6             | %                   | 6.6              | %                   |
|                   |         |                   |                 | HEMATOCRIT(PCV)     | 0.39            | L/L                 | 39               | %                   |
|                   |         |                   |                 | HEMOGLOBIN          | 12.8            | G/DL                | 12.8             | G/DL                |
|                   |         |                   |                 | LYMPHOCYTES         | 16              | %                   | 16               | %                   |
|                   |         |                   |                 | MCH                 | 29.9            | PG                  | 29.9             | PG                  |
|                   |         |                   |                 | MCHC                | 14.2            | %                   | 14.2             | PG                  |
|                   |         |                   |                 | MCV                 | 91              | FL                  | 91               | FL                  |
|                   |         |                   |                 | MONOCYTES           | 8.1             | %                   | 8.1              | %                   |
|                   |         | PLATELETS         | 242             | X10 <sup>9</sup>    | 242             | 10 <sup>3</sup> /UL |                  |                     |
|                   |         | RED BLOOD COUNT   | 4.28            | X10 <sup>12</sup>   | 4.28            | 10 <sup>6</sup> /UL |                  |                     |
|                   |         | WHITE BLOOD COUNT | 12.6            | X10 <sup>9</sup>    | 12.6            | 10 <sup>3</sup> /UL |                  |                     |
|                   |         | Day 6             | 21DEC2009       | ANC                 | 6.3             | X10 <sup>9</sup>    | 6.3              | 10 <sup>3</sup> /UL |
|                   |         |                   |                 | BASOPHILS           | 0.6             | %                   | 0.6              | %                   |
|                   |         |                   |                 | EOSINOPHILS         | 7.3             | %                   | 7.3              | %                   |
|                   |         |                   |                 | HEMATOCRIT(PCV)     | 0.34            | L/L                 | 34               | %                   |
|                   |         |                   |                 | HEMOGLOBIN          | 11.5            | G/DL                | 11.5             | G/DL                |
|                   |         |                   |                 | LYMPHOCYTES         | 19              | %                   | 19               | %                   |
|                   |         |                   |                 | MCH                 | 30              | PG                  | 30               | PG                  |
| MCHC              | 33.4    |                   |                 | %                   | 33.4            | PG                  |                  |                     |
| MCV               | 90      |                   |                 | FL                  | 90              | FL                  |                  |                     |
| MONOCYTES         | 8.2     |                   |                 | %                   | 8.2             | %                   |                  |                     |
| PLATELETS         | 332     | X10 <sup>9</sup>  | 332             | 10 <sup>3</sup> /UL |                 |                     |                  |                     |
| RED BLOOD COUNT   | 3.83    | X10 <sup>12</sup> | 3.83            | 10 <sup>6</sup> /UL |                 |                     |                  |                     |
| WHITE BLOOD COUNT | 9.7     | X10 <sup>9</sup>  | 9.7             | 10 <sup>3</sup> /UL |                 |                     |                  |                     |

Listing 10.2  
Laboratory Data: Hematology

| Center            | Patient | Visit           | Assessment Date | Parameter         | Recorded Result | Recorded Units | Converted Result | Converted Units |
|-------------------|---------|-----------------|-----------------|-------------------|-----------------|----------------|------------------|-----------------|
| XVO_005           | 302     | Day 14          | 29DEC2009       | ANC               | 6               | X10^9          | 6                | 10^3/UL         |
|                   |         |                 |                 | BASOPHILS         | 0.8             | %              | 0.8              | %               |
|                   |         |                 |                 | EOSINOPHILS       | 7.9             | %              | 7.9              | %               |
|                   |         |                 |                 | HEMATOCRIT(PCV)   | 0.35            | L/L            | 35               | %               |
|                   |         |                 |                 | HEMOGLOBIN        | 11.4            | G/DL           | 11.4             | G/DL            |
|                   |         |                 |                 | LYMPHOCYTES       | 16.9            | %              | 16.9             | %               |
|                   |         |                 |                 | MCH               | 29.7            | PG             | 29.7             | PG              |
|                   |         |                 |                 | MCHC              | 33              | %              | 33               | PG              |
|                   |         |                 |                 | MCV               | 90              | FL             | 90               | FL              |
|                   |         |                 |                 | MONOCYTES         | 9.4             | %              | 9.4              | %               |
|                   |         |                 |                 | PLATELETS         | 338             | X10^9          | 338              | 10^3/UL         |
|                   |         |                 |                 | RED BLOOD COUNT   | 3.84            | X10^12         | 3.84             | 10^6/UL         |
|                   |         |                 |                 | WHITE BLOOD COUNT | 9.2             | X10^9          | 9.2              | 10^3/UL         |
|                   |         |                 |                 | Day 30            | 15JAN2010       | ANC            | 6.3              | X10^9           |
|                   |         | BASOPHILS       | 0.4             |                   |                 | %              | 0.4              | %               |
|                   |         | EOSINOPHILS     | 6.2             |                   |                 | %              | 6.2              | %               |
|                   |         | HEMATOCRIT(PCV) | 0.33            |                   |                 | L/L            | 33               | %               |
|                   |         | HEMOGLOBIN      | 11.1            |                   |                 | G/DL           | 11.1             | G/DL            |
|                   |         | LYMPHOCYTES     | 18.2            |                   |                 | %              | 18.2             | %               |
|                   |         | MCH             | 29.8            |                   |                 | PG             | 29.8             | PG              |
|                   |         | MCHC            | 33.6            | %                 | 33.6            | PG             |                  |                 |
| MCV               | 89.0    | FL              | 89.0            | FL                |                 |                |                  |                 |
| MONOCYTES         | 12.2    | %               | 12.2            | %                 |                 |                |                  |                 |
| PLATELETS         | 225.0   | X10^9           | 225.0           | 10^3/UL           |                 |                |                  |                 |
| RED BLOOD COUNT   | 3.72    | X10^12          | 3.72            | 10^6/UL           |                 |                |                  |                 |
| WHITE BLOOD COUNT | 10.0    | X10^9           | 10.0            | 10^3/UL           |                 |                |                  |                 |



Listing 10.2  
Laboratory Data: Hematology

| Center            | Patient | Visit  | Assessment Date | Parameter         | Recorded Result | Recorded Units      | Converted Result | Converted Units     |
|-------------------|---------|--------|-----------------|-------------------|-----------------|---------------------|------------------|---------------------|
| XVO_005           | 302     | Day 42 | 25JAN2010       | ANC               | 6.0             | X10 <sup>9</sup>    | 6.0              | 10 <sup>3</sup> /UL |
|                   |         |        |                 | BASOPHILS         | 0.4             | %                   | 0.4              | %                   |
|                   |         |        |                 | EOSINOPHILS       | 7.3             | %                   | 7.3              | %                   |
|                   |         |        |                 | HEMATOCRIT(PCV)   | 0.33            | L/L                 | 33               | %                   |
|                   |         |        |                 | HEMOGLOBIN        | 10.8            | G/DL                | 10.8             | G/DL                |
|                   |         |        |                 | LYMPHOCYTES       | 19.4            | %                   | 19.4             | %                   |
|                   |         |        |                 | MCH               | 29.4            | PG                  | 29.4             | PG                  |
|                   |         |        |                 | MCHC              | 32.6            | %                   | 32.6             | PG                  |
|                   |         |        |                 | MCV               | 90              | FL                  | 90               | FL                  |
|                   |         |        |                 | MONOCYTES         | 6.7             | %                   | 6.7              | %                   |
|                   |         |        |                 | PLATELETS         | 258             | 10 <sup>3</sup> /UL | 258              | 10 <sup>3</sup> /UL |
|                   |         |        |                 | RED BLOOD COUNT   | 3.67            | X10 <sup>12</sup>   | 3.67             | 10 <sup>6</sup> /UL |
|                   |         |        |                 | WHITE BLOOD COUNT | 9.1             | X10 <sup>9</sup>    | 9.1              | 10 <sup>3</sup> /UL |
|                   |         |        |                 | XVO_007           | 401             | Screening           | 04NOV2009        | ANC                 |
| BASOPHILS         | 0.3     | %      | 0.3             |                   |                 |                     |                  | %                   |
| EOSINOPHILS       | 2.9     | %      | 2.9             |                   |                 |                     |                  | %                   |
| HEMATOCRIT(PCV)   | 38.3    | %      | 38.3            |                   |                 |                     |                  | %                   |
| HEMOGLOBIN        | 13.1    | G/DL   | 13.1            |                   |                 |                     |                  | G/DL                |
| LYMPHOCYTES       | 37.6    | %      | 37.6            |                   |                 |                     |                  | %                   |
| MCH               | 31.9    | PG     | 31.9            |                   |                 |                     |                  | PG                  |
| MCHC              | 34.3    | PG     | 34.3            |                   |                 |                     |                  | PG                  |
| MCV               | 92.9    | FL     | 92.9            |                   |                 |                     |                  | FL                  |
| MONOCYTES         | 7.4     | %      | 7.4             |                   |                 |                     |                  | %                   |
| PLATELETS         | 202     | K/UL   | 202             |                   |                 |                     |                  | 10 <sup>3</sup> /UL |
| RED BLOOD COUNT   | 4.12    | M/UL   | 4.12            |                   |                 |                     |                  | 10 <sup>6</sup> /UL |
| WHITE BLOOD COUNT | 4.3     | K/UL   | 4.3             |                   |                 |                     |                  | 10 <sup>3</sup> /UL |

Listing 10.2  
 Laboratory Data: Hematology

| Center            | Patient | Visit             | Assessment Date | Parameter           | Recorded Result | Recorded Units      | Converted Result | Converted Units     |
|-------------------|---------|-------------------|-----------------|---------------------|-----------------|---------------------|------------------|---------------------|
| XVO_007           | 401     | Day 0 Pre-dose    | 10NOV2009       | ANC                 | 2.2             | K/UL                | 2.2              | 10 <sup>3</sup> /UL |
|                   |         |                   |                 | BASOPHILS           | 0.7             | %                   | 0.7              | %                   |
|                   |         |                   |                 | EOSINOPHILS         | 3.7             | %                   | 3.7              | %                   |
|                   |         |                   |                 | HEMATOCRIT(PCV)     | 40.0            | %                   | 40.0             | %                   |
|                   |         |                   |                 | HEMOGLOBIN          | 13.6            | G/DL                | 13.6             | G/DL                |
|                   |         |                   |                 | LYMPHOCYTES         | 39.2            | %                   | 39.2             | %                   |
|                   |         |                   |                 | MCH                 | 31.7            | PG                  | 31.7             | PG                  |
|                   |         |                   |                 | MCHC                | 33.9            | PG                  | 33.9             | PG                  |
|                   |         |                   |                 | MCV                 | 93.6            | FL                  | 93.6             | FL                  |
|                   |         |                   |                 | MONOCYTES           | 8.4             | %                   | 8.4              | %                   |
|                   |         |                   |                 | PLATELETS           | 221             | K/UL                | 221              | 10 <sup>3</sup> /UL |
|                   |         | RED BLOOD COUNT   | 4.27            | M/UL                | 4.27            | 10 <sup>6</sup> /UL |                  |                     |
|                   |         | WHITE BLOOD COUNT | 4.6             | K/UL                | 4.6             | 10 <sup>3</sup> /UL |                  |                     |
|                   |         | Day 6             | 16NOV2009       | ANC                 | 2.4             | K/UL                | 2.4              | 10 <sup>3</sup> /UL |
|                   |         |                   |                 | BASOPHILS           | 0.6             | %                   | 0.6              | %                   |
|                   |         |                   |                 | EOSINOPHILS         | 4.7             | %                   | 4.7              | %                   |
|                   |         |                   |                 | HEMATOCRIT(PCV)     | 37.9            | %                   | 37.9             | %                   |
|                   |         |                   |                 | HEMOGLOBIN          | 12.9            | G/DL                | 12.9             | G/DL                |
|                   |         |                   |                 | LYMPHOCYTES         | 30.9            | %                   | 30.9             | %                   |
|                   |         |                   |                 | MCH                 | 31.4            | PG                  | 31.4             | PG                  |
|                   |         |                   |                 | MCHC                | 34.1            | PG                  | 34.1             | PG                  |
| MCV               | 92.1    |                   |                 | FL                  | 92.1            | FL                  |                  |                     |
| MONOCYTES         | 8.0     |                   |                 | %                   | 8.0             | %                   |                  |                     |
| PLATELETS         | 204     | K/UL              | 204             | 10 <sup>3</sup> /UL |                 |                     |                  |                     |
| RED BLOOD COUNT   | 4.11    | M/UL              | 4.11            | 10 <sup>6</sup> /UL |                 |                     |                  |                     |
| WHITE BLOOD COUNT | 4.3     | K/UL              | 4.3             | 10 <sup>3</sup> /UL |                 |                     |                  |                     |

Listing 10.2  
 Laboratory Data: Hematology

| Center            | Patient | Visit             | Assessment Date | Parameter           | Recorded Result | Recorded Units      | Converted Result | Converted Units     |
|-------------------|---------|-------------------|-----------------|---------------------|-----------------|---------------------|------------------|---------------------|
| XVO_007           | 401     | Day 14            | 24NOV2009       | ANC                 | 2.6             | K/UL                | 2.6              | 10 <sup>3</sup> /UL |
|                   |         |                   |                 | BASOPHILS           | 0.2             | %                   | 0.2              | %                   |
|                   |         |                   |                 | EOSINOPHILS         | 2.7             | %                   | 2.7              | %                   |
|                   |         |                   |                 | HEMATOCRIT(PCV)     | 37.7            | %                   | 37.7             | %                   |
|                   |         |                   |                 | HEMOGLOBIN          | 13.2            | G/DL                | 13.2             | G/DL                |
|                   |         |                   |                 | LYMPHOCYTES         | 28.1            | %                   | 28.1             | %                   |
|                   |         |                   |                 | MCH                 | 32.4            | PG                  | 32.4             | PG                  |
|                   |         |                   |                 | MCHC                | 34.9            | PG                  | 34.9             | PG                  |
|                   |         |                   |                 | MCV                 | 92.6            | FL                  | 92.6             | FL                  |
|                   |         |                   |                 | MONOCYTES           | 7.3             | %                   | 7.3              | %                   |
|                   |         |                   |                 | PLATELETS           | 209             | K/UL                | 209              | 10 <sup>3</sup> /UL |
|                   |         |                   |                 | RED BLOOD COUNT     | 4.07            | M/UL                | 4.07             | 10 <sup>6</sup> /UL |
|                   |         | WHITE BLOOD COUNT | 4.2             | K/UL                | 4.2             | 10 <sup>3</sup> /UL |                  |                     |
|                   |         | Day 30            | 08DEC2009       | ANC                 | 2.0             | K/UL                | 2.0              | 10 <sup>3</sup> /UL |
|                   |         |                   |                 | BASOPHILS           | 0.7             | %                   | 0.7              | %                   |
|                   |         |                   |                 | EOSINOPHILS         | 3.5             | %                   | 3.5              | %                   |
|                   |         |                   |                 | HEMATOCRIT(PCV)     | 40.0            | %                   | 40.0             | %                   |
|                   |         |                   |                 | HEMOGLOBIN          | 13.7            | G/DL                | 13.7             | G/DL                |
|                   |         |                   |                 | LYMPHOCYTES         | 32.6            | %                   | 32.6             | %                   |
|                   |         |                   |                 | MCH                 | 32.2            | PG                  | 32.2             | PG                  |
|                   |         |                   |                 | MCHC                | 34.3            | PG                  | 34.3             | PG                  |
| MCV               | 94.0    |                   |                 | FL                  | 94.0            | FL                  |                  |                     |
| MONOCYTES         | 8.1     | %                 | 8.1             | %                   |                 |                     |                  |                     |
| PLATELETS         | 198     | K/UL              | 198             | 10 <sup>3</sup> /UL |                 |                     |                  |                     |
| RED BLOOD COUNT   | 4.25    | M/UL              | 4.25            | 10 <sup>6</sup> /UL |                 |                     |                  |                     |
| WHITE BLOOD COUNT | 3.7     | K/UL              | 3.7             | 10 <sup>3</sup> /UL |                 |                     |                  |                     |

Listing 10.2  
 Laboratory Data: Hematology

| Center            | Patient           | Visit     | Assessment Date | Parameter           | Recorded Result     | Recorded Units | Converted Result | Converted Units     |
|-------------------|-------------------|-----------|-----------------|---------------------|---------------------|----------------|------------------|---------------------|
| XVO_007           | 401               | Day 42    | 22DEC2009       | ANC                 | 2.8                 | K/UL           | 2.8              | 10 <sup>3</sup> /UL |
|                   |                   |           |                 | BASOPHILS           | 0.5                 | %              | 0.5              | %                   |
|                   |                   |           |                 | EOSINOPHILS         | 1.4                 | %              | 1.4              | %                   |
|                   |                   |           |                 | HEMATOCRIT(PCV)     | 38.6                | %              | 38.6             | %                   |
|                   |                   |           |                 | HEMOGLOBIN          | 13.3                | G/DL           | 13.3             | G/DL                |
|                   |                   |           |                 | LYMPHOCYTES         | 24.5                | %              | 24.5             | %                   |
|                   |                   |           |                 | MCH                 | 32.6                | PG             | 32.6             | PG                  |
|                   |                   |           |                 | MCHC                | 34.6                | PG             | 34.6             | PG                  |
|                   |                   |           |                 | MCV                 | 94.2                | FL             | 94.2             | FL                  |
|                   |                   |           |                 | MONOCYTES           | 8.5                 | %              | 8.5              | %                   |
|                   | PLATELETS         | 194       | K/UL            | 194                 | 10 <sup>3</sup> /UL |                |                  |                     |
|                   | RED BLOOD COUNT   | 4.09      | M/UL            | 4.09                | 10 <sup>6</sup> /UL |                |                  |                     |
|                   | WHITE BLOOD COUNT | 4.4       | K/UL            | 4.4                 | 10 <sup>3</sup> /UL |                |                  |                     |
|                   | 402               | Screening | 03DEC2009       | ANC                 | 3.2                 | K/UL           | 3.2              | 10 <sup>3</sup> /UL |
|                   |                   |           |                 | BASOPHILS           | 0.5                 | %              | 0.5              | %                   |
|                   |                   |           |                 | EOSINOPHILS         | 1.5                 | %              | 1.5              | %                   |
|                   |                   |           |                 | HEMATOCRIT(PCV)     | 41.1                | %              | 41.1             | %                   |
|                   |                   |           |                 | HEMOGLOBIN          | 13.6                | G/DL           | 13.6             | G/DL                |
|                   |                   |           |                 | LYMPHOCYTES         | 31.3                | %              | 31.3             | %                   |
|                   |                   |           |                 | MCH                 | 29.3                | PG             | 29.3             | PG                  |
| MCHC              |                   |           |                 | 33.0                | PG                  | 33.0           | PG               |                     |
| MCV               |                   |           |                 | 88.9                | FL                  | 88.9           | FL               |                     |
| MONOCYTES         |                   |           |                 | 8.6                 | %                   | 8.6            | %                |                     |
| PLATELETS         | 341               | K/UL      | 341             | 10 <sup>3</sup> /UL |                     |                |                  |                     |
| RED BLOOD COUNT   | 4.62              | M/UL      | 4.62            | 10 <sup>6</sup> /UL |                     |                |                  |                     |
| WHITE BLOOD COUNT | 5.6               | K/UL      | 5.6             | 10 <sup>3</sup> /UL |                     |                |                  |                     |

Listing 10.2  
 Laboratory Data: Hematology

| Center            | Patient | Visit             | Assessment Date | Parameter           | Recorded Result | Recorded Units      | Converted Result | Converted Units     |
|-------------------|---------|-------------------|-----------------|---------------------|-----------------|---------------------|------------------|---------------------|
| XVO_007           | 402     | Day 0 Pre-dose    | 08DEC2009       | ANC                 | 7.8             | K/UL                | 7.8              | 10 <sup>3</sup> /UL |
|                   |         |                   |                 | BASOPHILS           | 0.3             | %                   | 0.3              | %                   |
|                   |         |                   |                 | EOSINOPHILS         | 1.5             | %                   | 1.5              | %                   |
|                   |         |                   |                 | HEMATOCRIT(PCV)     | 43.2            | %                   | 43.2             | %                   |
|                   |         |                   |                 | HEMOGLOBIN          | 14.6            | G/DL                | 14.6             | G/DL                |
|                   |         |                   |                 | LYMPHOCYTES         | 19.2            | %                   | 19.2             | %                   |
|                   |         |                   |                 | MCH                 | 30.1            | PG                  | 30.1             | PG                  |
|                   |         |                   |                 | MCHC                | 33.8            | PG                  | 33.8             | PG                  |
|                   |         |                   |                 | MCV                 | 89.1            | FL                  | 89.1             | FL                  |
|                   |         |                   |                 | MONOCYTES           | 5.8             | %                   | 5.8              | %                   |
|                   |         | PLATELETS         | 317             | K/UL                | 317             | 10 <sup>3</sup> /UL |                  |                     |
|                   |         | RED BLOOD COUNT   | 4.85            | M/UL                | 4.85            | 10 <sup>6</sup> /UL |                  |                     |
|                   |         | WHITE BLOOD COUNT | 10.7            | K/UL                | 10.7            | 10 <sup>3</sup> /UL |                  |                     |
|                   |         | Day 6             | 14DEC2009       | ANC                 | 4.7             | K/UL                | 4.7              | 10 <sup>3</sup> /UL |
|                   |         |                   |                 | BASOPHILS           | 0.6             | %                   | 0.6              | %                   |
|                   |         |                   |                 | EOSINOPHILS         | 0.9             | %                   | 0.9              | %                   |
|                   |         |                   |                 | HEMATOCRIT(PCV)     | 38.0            | %                   | 38.0             | %                   |
|                   |         |                   |                 | HEMOGLOBIN          | 12.8            | G/DL                | 12.8             | G/DL                |
|                   |         |                   |                 | LYMPHOCYTES         | 21.7            | %                   | 21.7             | %                   |
|                   |         |                   |                 | MCH                 | 29.7            | PG                  | 29.7             | PG                  |
| MCHC              | 33.8    |                   |                 | PG                  | 33.8            | PG                  |                  |                     |
| MCV               | 87.7    |                   |                 | FL                  | 87.7            | FL                  |                  |                     |
| MONOCYTES         | 7.5     |                   |                 | %                   | 7.5             | %                   |                  |                     |
| PLATELETS         | 284     | K/UL              | 284             | 10 <sup>3</sup> /UL |                 |                     |                  |                     |
| RED BLOOD COUNT   | 4.33    | M/UL              | 4.33            | 10 <sup>6</sup> /UL |                 |                     |                  |                     |
| WHITE BLOOD COUNT | 6.8     | K/UL              | 6.8             | 10 <sup>3</sup> /UL |                 |                     |                  |                     |

Listing 10.2  
 Laboratory Data: Hematology

| Center            | Patient | Visit             | Assessment Date | Parameter           | Recorded Result | Recorded Units      | Converted Result | Converted Units     |
|-------------------|---------|-------------------|-----------------|---------------------|-----------------|---------------------|------------------|---------------------|
| XVO_007           | 402     | Day 14            | 22DEC2009       | ANC                 | 4.8             | K/UL                | 4.8              | 10 <sup>3</sup> /UL |
|                   |         |                   |                 | BASOPHILS           | 0.4             | %                   | 0.4              | %                   |
|                   |         |                   |                 | EOSINOPHILS         | 1.2             | %                   | 1.2              | %                   |
|                   |         |                   |                 | HEMATOCRIT(PCV)     | 39.8            | %                   | 39.8             | %                   |
|                   |         |                   |                 | HEMOGLOBIN          | 13.6            | G/DL                | 13.6             | G/DL                |
|                   |         |                   |                 | LYMPHOCYTES         | 21.6            | %                   | 21.6             | %                   |
|                   |         |                   |                 | MCH                 | 29.8            | PG                  | 29.8             | PG                  |
|                   |         |                   |                 | MCHC                | 34.1            | PG                  | 34.1             | PG                  |
|                   |         |                   |                 | MCV                 | 87.2            | FL                  | 87.2             | FL                  |
|                   |         |                   |                 | MONOCYTES           | 8.0             | %                   | 8.0              | %                   |
|                   |         | PLATELETS         | 305             | K/UL                | 305             | 10 <sup>3</sup> /UL |                  |                     |
|                   |         | RED BLOOD COUNT   | 4.57            | M/UL                | 4.57            | 10 <sup>6</sup> /UL |                  |                     |
|                   |         | WHITE BLOOD COUNT | 6.9             | K/UL                | 6.9             | 10 <sup>3</sup> /UL |                  |                     |
|                   |         | Day 30            | 05JAN2010       | ANC                 | 6.5             | K/UL                | 6.5              | 10 <sup>3</sup> /UL |
|                   |         |                   |                 | BASOPHILS           | 0.4             | %                   | 0.4              | %                   |
|                   |         |                   |                 | EOSINOPHILS         | 0.8             | %                   | 0.8              | %                   |
|                   |         |                   |                 | HEMATOCRIT(PCV)     | 40.5            | %                   | 40.5             | %                   |
|                   |         |                   |                 | HEMOGLOBIN          | 13.9            | G/DL                | 13.9             | G/DL                |
|                   |         |                   |                 | LYMPHOCYTES         | 15.1            | %                   | 15.1             | %                   |
|                   |         |                   |                 | MCH                 | 30.0            | PG                  | 30.0             | PG                  |
| MCHC              | 34.2    |                   |                 | PG                  | 34.2            | PG                  |                  |                     |
| MCV               | 87.7    |                   |                 | FL                  | 87.7            | FL                  |                  |                     |
| MONOCYTES         | 8.1     |                   |                 | %                   | 8.1             | %                   |                  |                     |
| PLATELETS         | 270     | K/UL              | 270             | 10 <sup>3</sup> /UL |                 |                     |                  |                     |
| RED BLOOD COUNT   | 4.61    | M/UL              | 4.61            | 10 <sup>6</sup> /UL |                 |                     |                  |                     |
| WHITE BLOOD COUNT | 8.6     | K/UL              | 8.6             | 10 <sup>3</sup> /UL |                 |                     |                  |                     |

Listing 10.2  
 Laboratory Data: Hematology

| Center  | Patient | Visit  | Assessment Date | Parameter         | Recorded Result | Recorded Units | Converted Result | Converted Units     |
|---------|---------|--------|-----------------|-------------------|-----------------|----------------|------------------|---------------------|
| XVO_007 | 402     | Day 42 | 19JAN2010       | ANC               | 4.9             | K/UL           | 4.9              | 10 <sup>3</sup> /UL |
|         |         |        |                 | BASOPHILS         | 0.8             | %              | 0.8              | %                   |
|         |         |        |                 | EOSINOPHILS       | 1.7             | %              | 1.7              | %                   |
|         |         |        |                 | HEMATOCRIT (PCV)  | 40.2            | %              | 40.2             | %                   |
|         |         |        |                 | HEMOGLOBIN        | 13.7            | G/DL           | 13.7             | G/DL                |
|         |         |        |                 | LYMPHOCYTES       | 23.8            | %              | 23.8             | %                   |
|         |         |        |                 | MCH               | 30.0            | PG             | 30.0             | PG                  |
|         |         |        |                 | MCHC              | 34.2            | PG             | 34.2             | PG                  |
|         |         |        |                 | MCV               | 87.7            | FL             | 87.7             | FL                  |
|         |         |        |                 | MONOCYTES         | 8.9             | %              | 8.9              | %                   |
|         |         |        |                 | PLATELETS         | 277             | K/UL           | 277              | 10 <sup>3</sup> /UL |
|         |         |        |                 | RED BLOOD COUNT   | 4.58            | M/UL           | 4.58             | 10 <sup>6</sup> /UL |
|         |         |        |                 | WHITE BLOOD COUNT | 7.5             | K/UL           | 7.5              | 10 <sup>3</sup> /UL |

Listing 10.3  
 Laboratory Data: Urinalysis

| Center            | Patient  | Visit             | Assessment Date | Parameter        | Recorded Result | Recorded Units | Converted Result | Converted Units |
|-------------------|----------|-------------------|-----------------|------------------|-----------------|----------------|------------------|-----------------|
| XVO_001           | 101      | Screening         | 09NOV2009       | BILIRUBIN        | ND              |                | ND               |                 |
|                   |          |                   |                 | CASTS            | NEGATIVE        | /LPF           | NEGATIVE         | /LPF            |
|                   |          |                   |                 | CRYSTALS         | NEGATIVE        | /LPF           | NEGATIVE         | /LPF            |
|                   |          |                   |                 | EPITHELIAL CELLS | ND              | /HPF           | ND               | /HPF            |
|                   |          |                   |                 | GLUCOSE          | NORMAL          |                | NORMAL           |                 |
|                   |          |                   |                 | HEMOGLOBIN       | NEGATIVE        |                | NEGATIVE         |                 |
|                   |          |                   |                 | KETONES          | (-) NEGATIVE    |                | (-) NEGATIVE     | MG/DL           |
|                   |          |                   |                 | PH               | 5.5             |                | 5.5              |                 |
|                   |          |                   |                 | PROTEIN          | (-) NEGATIVE    |                | (-) NEGATIVE     | MG/DL           |
|                   |          |                   |                 | RED BLOOD CELLS  | 1               | /HPF           | 1                | /UL             |
|                   |          | SPECIFIC GRAVITY  | 1.005           |                  | 1.005           |                |                  |                 |
|                   |          | WHITE BLOOD CELLS | 9               | /HPF             | 9               | /UL            |                  |                 |
|                   |          | Day 6             | 16NOV2009       | BILIRUBIN        | ND              |                | ND               |                 |
|                   |          |                   |                 | CASTS            | NEGATIVE        | /LPF           | NEGATIVE         | /LPF            |
|                   |          |                   |                 | CRYSTALS         | NEGATIVE        | /LPF           | NEGATIVE         | /LPF            |
|                   |          |                   |                 | EPITHELIAL CELLS | 1               | /HPF           | 1                | /HPF            |
|                   |          |                   |                 | GLUCOSE          | NORMAL          |                | NORMAL           |                 |
|                   |          |                   |                 | HEMOGLOBIN       | NEGATIVE        |                | NEGATIVE         |                 |
|                   |          |                   |                 | KETONES          | NEGATIVE        |                | NEGATIVE         | MG/DL           |
|                   |          |                   |                 | PH               | 6.0             |                | 6.0              |                 |
| PROTEIN           | NEGATIVE |                   |                 |                  | NEGATIVE        | MG/DL          |                  |                 |
| RED BLOOD CELLS   | 6        |                   |                 | /HPF             | 6               | /UL            |                  |                 |
| SPECIFIC GRAVITY  | 1.013    |                   | 1.013           |                  |                 |                |                  |                 |
| WHITE BLOOD CELLS | 3        | /HPF              | 3               | /UL              |                 |                |                  |                 |

Note: ND=Not Done.



Listing 10.3  
 Laboratory Data: Urinalysis

| Center            | Patient  | Visit             | Assessment Date | Parameter        | Recorded Result | Recorded Units | Converted Result | Converted Units |
|-------------------|----------|-------------------|-----------------|------------------|-----------------|----------------|------------------|-----------------|
| XVO_001           | 101      | Day 14            | 24NOV2009       | BILIRUBIN        | ND              |                | ND               |                 |
|                   |          |                   |                 | CASTS            | NEGATIVE        | /LPF           | NEGATIVE         | /LPF            |
|                   |          |                   |                 | CRYSTALS         | NEGATIVE        | /LPF           | NEGATIVE         | /LPF            |
|                   |          |                   |                 | EPITHELIAL CELLS | 4               | /HPF           | 4                | /HPF            |
|                   |          |                   |                 | GLUCOSE          | NORMAL          |                | NORMAL           |                 |
|                   |          |                   |                 | HEMOGLOBIN       | SMALL           |                | SMALL            |                 |
|                   |          |                   |                 | KETONES          | NEGATIVE        |                | NEGATIVE         | MG/DL           |
|                   |          |                   |                 | PH               | 5.0             |                | 5.0              |                 |
|                   |          |                   |                 | PROTEIN          | NEGATIVE        |                | NEGATIVE         | MG/DL           |
|                   |          |                   |                 | RED BLOOD CELLS  | 9               | /HPF           | 9                | /UL             |
|                   |          | SPECIFIC GRAVITY  | 1.016           |                  | 1.016           |                |                  |                 |
|                   |          | WHITE BLOOD CELLS | 2               | /HPF             | 2               | /UL            |                  |                 |
|                   |          | Day 30            | 11DEC2009       | BILIRUBIN        | ND              |                | ND               |                 |
|                   |          |                   |                 | CASTS            | NEGATIVE        | /LPF           | NEGATIVE         | /LPF            |
|                   |          |                   |                 | CRYSTALS         | NEGATIVE        | /LPF           | NEGATIVE         | /LPF            |
|                   |          |                   |                 | EPITHELIAL CELLS | <1              | /HPF           | <1               | /HPF            |
|                   |          |                   |                 | GLUCOSE          | NORMAL          |                | NORMAL           |                 |
|                   |          |                   |                 | HEMOGLOBIN       | NEGATIVE        |                | NEGATIVE         |                 |
|                   |          |                   |                 | KETONES          | NEGATIVE        |                | NEGATIVE         | MG/DL           |
|                   |          |                   |                 | PH               | 5.5             |                | 5.5              |                 |
| PROTEIN           | NEGATIVE |                   |                 |                  | NEGATIVE        | MG/DL          |                  |                 |
| RED BLOOD CELLS   | 3        |                   |                 | /HPF             | 3               | /UL            |                  |                 |
| SPECIFIC GRAVITY  | 1.006    |                   | 1.006           |                  |                 |                |                  |                 |
| WHITE BLOOD CELLS | <1       | /HPF              | <1              | /UL              |                 |                |                  |                 |

Note: ND=Not Done.

Listing 10.3  
 Laboratory Data: Urinalysis

| Center            | Patient           | Visit     | Assessment Date | Parameter        | Recorded Result | Recorded Units | Converted Result | Converted Units |
|-------------------|-------------------|-----------|-----------------|------------------|-----------------|----------------|------------------|-----------------|
| XVO_001           | 101               | Day 42    | 05JAN2010       | BILIRUBIN        | ND              |                | ND               |                 |
|                   |                   |           |                 | CASTS            | ND              | /LPF           | ND               | /LPF            |
|                   |                   |           |                 | CRYSTALS         | ND              | /LPF           | ND               | /LPF            |
|                   |                   |           |                 | EPITHELIAL CELLS | ND              | /HPF           | ND               | /HPF            |
|                   |                   |           |                 | GLUCOSE          | ND              |                | ND               |                 |
|                   |                   |           |                 | HEMOGLOBIN       | ND              |                | ND               |                 |
|                   |                   |           |                 | KETONES          | ND              |                | ND               | MG/DL           |
|                   |                   |           |                 | PROTEIN          | 7               | MG/DL          | 7                | MG/DL           |
|                   |                   |           |                 | RED BLOOD CELLS  | ND              | /HPF           | ND               | /UL             |
|                   |                   |           |                 | SPECIFIC GRAVITY | ND              |                | ND               |                 |
|                   | WHITE BLOOD CELLS | ND        | /HPF            | ND               | /UL             |                |                  |                 |
|                   | 102               | Screening | 11DEC2009       | CASTS            | NEGATIVE        | /LPF           | NEGATIVE         | /LPF            |
|                   |                   |           |                 | CRYSTALS         | NEGATIVE        | /LPF           | NEGATIVE         | /LPF            |
|                   |                   |           |                 | EPITHELIAL CELLS | 1               | /HPF           | 1                | /HPF            |
|                   |                   |           |                 | GLUCOSE          | NORMAL          |                | NORMAL           |                 |
|                   |                   |           |                 | HEMOGLOBIN       | NEGATIVE        |                | NEGATIVE         |                 |
|                   |                   |           |                 | KETONES          | TRACE           |                | TRACE            | MG/DL           |
|                   |                   |           |                 | PH               | 6.0             |                | 6.0              |                 |
|                   |                   |           |                 | PROTEIN          | 30              | MG/DL          | 30               | MG/DL           |
|                   |                   |           |                 | RED BLOOD CELLS  | 4               | /HPF           | 4                | /UL             |
| SPECIFIC GRAVITY  |                   |           |                 | 1.032            |                 | 1.032          |                  |                 |
| WHITE BLOOD CELLS | 2                 | /HPF      | 2               | /UL              |                 |                |                  |                 |
|                   | Day 0 Pre-dose    | 15DEC2009 | BILIRUBIN       | ND               |                 | ND             |                  |                 |
|                   |                   |           | CASTS           | NEGATIVE         | /LPF            | NEGATIVE       | /LPF             |                 |

Note: ND=Not Done.

Listing 10.3  
 Laboratory Data: Urinalysis

| Center            | Patient   | Visit             | Assessment Date | Parameter        | Recorded Result | Recorded Units | Converted Result | Converted Units |
|-------------------|-----------|-------------------|-----------------|------------------|-----------------|----------------|------------------|-----------------|
| XVO_001           | 102       | Day 0 Pre-dose    | 15DEC2009       | CRYSTALS         | NEGATIVE        | /LPF           | NEGATIVE         | /LPF            |
|                   |           |                   |                 | EPITHELIAL CELLS | 0               | /HPF           | 0                | /HPF            |
|                   |           |                   |                 | GLUCOSE          | NORMAL          |                | NORMAL           |                 |
|                   |           |                   |                 | HEMOGLOBIN       | NEGATIVE        |                | NEGATIVE         |                 |
|                   |           |                   |                 | KETONES          | NEGATIVE        |                | NEGATIVE         | MG/DL           |
|                   |           |                   |                 | PH               | 6.0             |                | 6.0              |                 |
|                   |           |                   |                 | PROTEIN          | 10              | MG/DL          | 10               | MG/DL           |
|                   |           |                   |                 | RED BLOOD CELLS  | 1               | /HPF           | 1                | /UL             |
|                   |           |                   |                 | SPECIFIC GRAVITY | 1.013           |                | 1.013            |                 |
|                   |           | WHITE BLOOD CELLS | 1               | /HPF             | 1               | /UL            |                  |                 |
|                   |           | Day 6             | 21DEC2009       | BILIRUBIN        | ND              |                | ND               |                 |
|                   |           |                   |                 | CASTS            | NEGATIVE        | /LPF           | NEGATIVE         | /LPF            |
|                   |           |                   |                 | CRYSTALS         | NEGATIVE        | /LPF           | NEGATIVE         | /LPF            |
|                   |           |                   |                 | EPITHELIAL CELLS | 0               | /HPF           | 0                | /HPF            |
|                   |           |                   |                 | GLUCOSE          | NORMAL          |                | NORMAL           |                 |
|                   |           |                   |                 | HEMOGLOBIN       | NEGATIVE        |                | NEGATIVE         |                 |
|                   |           |                   |                 | KETONES          | 10              | MG/DL          | 10               | MG/DL           |
|                   |           |                   |                 | PH               | 6.0             |                | 6.0              |                 |
|                   |           |                   |                 | PROTEIN          | 30              | MG/DL          | 30               | MG/DL           |
| RED BLOOD CELLS   | 4         | /HPF              | 4               | /UL              |                 |                |                  |                 |
| SPECIFIC GRAVITY  | 1.029     |                   | 1.029           |                  |                 |                |                  |                 |
| WHITE BLOOD CELLS | 2         | /HPF              | 2               | /UL              |                 |                |                  |                 |
| Day 14            | 29DEC2009 | BILIRUBIN         | ND              |                  | ND              |                |                  |                 |
|                   |           | CASTS             | NEGATIVE        | /LPF             | NEGATIVE        | /LPF           |                  |                 |

Note: ND=Not Done.

Listing 10.3  
 Laboratory Data: Urinalysis

| Center            | Patient          | Visit     | Assessment Date | Parameter         | Recorded Result | Recorded Units | Converted Result | Converted Units |          |      |
|-------------------|------------------|-----------|-----------------|-------------------|-----------------|----------------|------------------|-----------------|----------|------|
| XVO_001           | 102              | Day 14    | 29DEC2009       | CRYSTALS          | NEGATIVE        | /LPF           | NEGATIVE         | /LPF            |          |      |
|                   |                  |           |                 | EPITHELIAL CELLS  | 0               | /HPF           | 0                | /HPF            |          |      |
|                   |                  |           |                 | GLUCOSE           | NORMAL          |                | NORMAL           |                 |          |      |
|                   |                  |           |                 | HEMOGLOBIN        | NEGATIVE        |                | NEGATIVE         |                 |          |      |
|                   |                  |           |                 | KETONES           | NEGATIVE        |                | NEGATIVE         | MG/DL           |          |      |
|                   |                  |           |                 | PH                | 7.0             |                | 7.0              |                 |          |      |
|                   |                  |           |                 | PROTEIN           | NEGATIVE        |                | NEGATIVE         | MG/DL           |          |      |
|                   |                  |           |                 | RED BLOOD CELLS   | 1               | /HPF           | 1                | /UL             |          |      |
|                   |                  |           |                 | SPECIFIC GRAVITY  | 1.017           |                | 1.017            |                 |          |      |
|                   |                  |           |                 | WHITE BLOOD CELLS | 1               | /HPF           | 1                | /UL             |          |      |
|                   |                  |           |                 | Day 30            | 15JAN2010       | BILIRUBIN      | ND               |                 | ND       |      |
|                   |                  |           |                 |                   |                 | CASTS          | NEGATIVE         | /LPF            | NEGATIVE | /LPF |
|                   |                  |           |                 |                   |                 | CRYSTALS       | NEGATIVE         | /LPF            | NEGATIVE | /LPF |
|                   | EPITHELIAL CELLS | 1         | /HPF            |                   |                 | 1              | /HPF             |                 |          |      |
|                   | GLUCOSE          | NORMAL    |                 |                   |                 | NORMAL         |                  |                 |          |      |
|                   | HEMOGLOBIN       | NEGATIVE  |                 |                   |                 | NEGATIVE       |                  |                 |          |      |
|                   | Day 42           | 29JAN2010 | KETONES         | NEGATIVE          |                 | NEGATIVE       | MG/DL            |                 |          |      |
|                   |                  |           | PH              | 6.0               |                 | 6.0            |                  |                 |          |      |
|                   |                  |           | PROTEIN         | NEGATIVE          |                 | NEGATIVE       | MG/DL            |                 |          |      |
| RED BLOOD CELLS   |                  |           | 2               | /HPF              | 2               | /UL            |                  |                 |          |      |
| SPECIFIC GRAVITY  |                  |           | 1.019           |                   | 1.019           |                |                  |                 |          |      |
| WHITE BLOOD CELLS |                  |           | 1               | /HPF              | 1               | /UL            |                  |                 |          |      |
| 103               | Screening        | 11JAN2010 | PROTEIN         | ND                |                 | ND             | MG/DL            |                 |          |      |
|                   |                  |           | BILIRUBIN       | ND                |                 | ND             |                  |                 |          |      |

Note: ND=Not Done.

Listing 10.3  
 Laboratory Data: Urinalysis

| Center            | Patient   | Visit            | Assessment Date | Parameter         | Recorded Result | Recorded Units | Converted Result | Converted Units |      |  |
|-------------------|-----------|------------------|-----------------|-------------------|-----------------|----------------|------------------|-----------------|------|--|
| XVO_001           | 103       | Screening        | 11JAN2010       | CASTS             | NEGATIVE        | /LPF           | NEGATIVE         | /LPF            |      |  |
|                   |           |                  |                 | CRYSTALS          | NEGATIVE        | /LPF           | NEGATIVE         | /LPF            |      |  |
|                   |           |                  |                 | EPITHELIAL CELLS  | 0               | /HPF           | 0                | /HPF            |      |  |
|                   |           |                  |                 | GLUCOSE           | NORMAL          |                | NORMAL           |                 |      |  |
|                   |           |                  |                 | HEMOGLOBIN        | NEGATIVE        |                | NEGATIVE         |                 |      |  |
|                   |           |                  |                 | KETONES           | NEGATIVE        |                | NEGATIVE         | MG/DL           |      |  |
|                   |           |                  |                 | PH                | 5.0             |                | 5.0              |                 |      |  |
|                   |           |                  |                 | PROTEIN           | NEGATIVE        |                | NEGATIVE         | MG/DL           |      |  |
|                   |           |                  |                 | RED BLOOD CELLS   | 5               | /HPF           | 5                | /UL             |      |  |
|                   |           |                  |                 | SPECIFIC GRAVITY  | 1.008           |                | 1.008            |                 |      |  |
|                   |           |                  |                 | WHITE BLOOD CELLS | 1               | /HPF           | 1                | /UL             |      |  |
|                   |           |                  |                 | Day 6             | 19JAN2010       | BILIRUBIN      | ND               |                 | ND   |  |
|                   |           |                  |                 | CASTS             |                 | NEGATIVE       | /LPF             | NEGATIVE        | /LPF |  |
|                   |           | CRYSTALS         | NEGATIVE        | /LPF              |                 | NEGATIVE       | /LPF             |                 |      |  |
|                   |           | EPITHELIAL CELLS | 0               | /HPF              |                 | 0              | /HPF             |                 |      |  |
|                   |           | GLUCOSE          | NORMAL          |                   |                 | NORMAL         |                  |                 |      |  |
|                   |           | HEMOGLOBIN       | TRACE           |                   |                 | TRACE          |                  |                 |      |  |
|                   |           | KETONES          | NEGATIVE        |                   |                 | NEGATIVE       | MG/DL            |                 |      |  |
|                   |           | PH               | 6.0             |                   | 6.0             |                |                  |                 |      |  |
|                   |           | PROTEIN          | NEGATIVE        |                   | NEGATIVE        | MG/DL          |                  |                 |      |  |
| RED BLOOD CELLS   | 9         | /HPF             | 9               | /UL               |                 |                |                  |                 |      |  |
| SPECIFIC GRAVITY  | 1.025     |                  | 1.025           |                   |                 |                |                  |                 |      |  |
| WHITE BLOOD CELLS | 1         | /HPF             | 1               | /UL               |                 |                |                  |                 |      |  |
| Day 14            | 26JAN2010 | BILIRUBIN        | ND              |                   | ND              |                |                  |                 |      |  |

Note: ND=Not Done.

Listing 10.3  
 Laboratory Data: Urinalysis

| Center  | Patient | Visit             | Assessment Date | Parameter         | Recorded Result | Recorded Units | Converted Result | Converted Units |          |      |
|---------|---------|-------------------|-----------------|-------------------|-----------------|----------------|------------------|-----------------|----------|------|
| XVO_001 | 103     | Day 14            | 26JAN2010       | CASTS             | NEGATIVE        | /LPF           | NEGATIVE         | /LPF            |          |      |
|         |         |                   |                 | CRYSTALS          | NEGATIVE        | /LPF           | NEGATIVE         | /LPF            |          |      |
|         |         |                   |                 | EPITHELIAL CELLS  | 0               | /HPF           | 0                | /HPF            |          |      |
|         |         |                   |                 | GLUCOSE           | NORMAL          |                | NORMAL           |                 |          |      |
|         |         |                   |                 | HEMOGLOBIN        | NEGATIVE        |                | NEGATIVE         |                 |          |      |
|         |         |                   |                 | KETONES           | NEGATIVE        |                | NEGATIVE         | MG/DL           |          |      |
|         |         |                   |                 | PH                | 6.0             |                | 6.0              |                 |          |      |
|         |         |                   |                 | PROTEIN           | NEGATIVE        |                | NEGATIVE         | MG/DL           |          |      |
|         |         |                   |                 | RED BLOOD CELLS   | 1               | /HPF           | 1                | /UL             |          |      |
|         |         |                   |                 | SPECIFIC GRAVITY  | 1.005           |                | 1.005            |                 |          |      |
|         |         |                   |                 | WHITE BLOOD CELLS | 0               | /HPF           | 0                | /UL             |          |      |
|         |         |                   |                 | Day 30            | 09FEB2010       | BILIRUBIN      | ND               |                 | ND       |      |
|         |         |                   |                 |                   |                 | CASTS          | NEGATIVE         | /LPF            | NEGATIVE | /LPF |
|         |         |                   |                 |                   |                 | CRYSTALS       | NEGATIVE         | /LPF            | NEGATIVE | /LPF |
|         |         | EPITHELIAL CELLS  | 0               |                   |                 | /HPF           | 0                | /HPF            |          |      |
|         |         | GLUCOSE           | NORMAL          |                   |                 |                | NORMAL           |                 |          |      |
|         |         | HEMOGLOBIN        | NEGATIVE        |                   |                 |                | NEGATIVE         |                 |          |      |
|         |         | KETONES           | NEGATIVE        |                   |                 |                | NEGATIVE         | MG/DL           |          |      |
|         |         | PH                | 6.0             |                   |                 |                | 6.0              |                 |          |      |
|         |         | PROTEIN           | NEGATIVE        |                   |                 |                | NEGATIVE         | MG/DL           |          |      |
|         |         | RED BLOOD CELLS   | 7               |                   |                 | /HPF           | 7                | /UL             |          |      |
|         |         | SPECIFIC GRAVITY  | 1.016           |                   |                 |                | 1.016            |                 |          |      |
|         |         | WHITE BLOOD CELLS | 1               |                   |                 | /HPF           | 1                | /UL             |          |      |
|         |         | Day 42            | 19FEB2010       |                   |                 | BILIRUBIN      | ND               |                 | ND       |      |

Note: ND=Not Done.

Listing 10.3  
Laboratory Data: Urinalysis

| Center            | Patient        | Visit     | Assessment Date | Parameter         | Recorded Result | Recorded Units | Converted Result | Converted Units |     |      |     |      |
|-------------------|----------------|-----------|-----------------|-------------------|-----------------|----------------|------------------|-----------------|-----|------|-----|------|
| XVO_001           | 103            | Day 42    | 19FEB2010       | CASTS             | NEGATIVE        | /LPF           | NEGATIVE         | /LPF            |     |      |     |      |
|                   |                |           |                 | CRYSTALS          | NEGATIVE        | /LPF           | NEGATIVE         | /LPF            |     |      |     |      |
|                   |                |           |                 | EPITHELIAL CELLS  | 0               | /HPF           | 0                | /HPF            |     |      |     |      |
|                   |                |           |                 | GLUCOSE           | NORMAL          |                | NORMAL           |                 |     |      |     |      |
|                   |                |           |                 | HEMOGLOBIN        | TRACE           |                | TRACE            |                 |     |      |     |      |
|                   |                |           |                 | KETONES           | NEGATIVE        |                | NEGATIVE         | MG/DL           |     |      |     |      |
|                   |                |           |                 | PH                | 5.0             |                | 5.0              |                 |     |      |     |      |
|                   |                |           |                 | PROTEIN           | NEGATIVE        |                | NEGATIVE         | MG/DL           |     |      |     |      |
|                   |                |           |                 | RED BLOOD CELLS   | 4               | /HPF           | 4                | /UL             |     |      |     |      |
|                   |                |           |                 | SPECIFIC GRAVITY  | 1.021           |                | 1.021            |                 |     |      |     |      |
|                   |                |           |                 | WHITE BLOOD CELLS | 1               | /HPF           | 1                | /UL             |     |      |     |      |
|                   |                |           |                 | XVO_003           | 201             | Screening      | 10NOV2009        | BILIRUBIN       | NEG |      | NEG |      |
|                   |                |           |                 |                   |                 |                |                  | CASTS           | 11  | /LPF | 11  | /LPF |
| CRYSTALS          | ND             | /LPF      | ND              |                   |                 |                |                  | /LPF            |     |      |     |      |
| EPITHELIAL CELLS  | 0              | /HPF      | 0               |                   |                 |                |                  | /HPF            |     |      |     |      |
| GLUCOSE           | NEG            |           | NEG             |                   |                 |                |                  |                 |     |      |     |      |
| HEMOGLOBIN        | NEG            |           | NEG             |                   |                 |                |                  |                 |     |      |     |      |
| KETONES           | NEG            |           | NEG             |                   |                 |                |                  | MG/DL           |     |      |     |      |
| PH                | 5.0            |           | 5.0             |                   |                 |                |                  |                 |     |      |     |      |
| PROTEIN           | NEG            |           | NEG             |                   |                 |                |                  | MG/DL           |     |      |     |      |
| RED BLOOD CELLS   | 8              | /UL       | 8               |                   |                 |                |                  | /UL             |     |      |     |      |
| SPECIFIC GRAVITY  | 1.018          |           | 1.018           |                   |                 |                |                  |                 |     |      |     |      |
| WHITE BLOOD CELLS | 2              | /UL       | 2               |                   |                 |                |                  | /UL             |     |      |     |      |
|                   |                |           |                 |                   |                 |                |                  |                 |     |      |     |      |
|                   | Day 0 Pre-dose | 17NOV2009 | BILIRUBIN       |                   |                 | NEG            |                  | NEG             |     |      |     |      |

Note: ND=Not Done.

Listing 10.3  
Laboratory Data: Urinalysis

| Center            | Patient   | Visit             | Assessment Date | Parameter        | Recorded Result | Recorded Units | Converted Result | Converted Units |
|-------------------|-----------|-------------------|-----------------|------------------|-----------------|----------------|------------------|-----------------|
| XVO_003           | 201       | Day 0 Pre-dose    | 17NOV2009       | CASTS            | 0               | /LPF           | 0                | /LPF            |
|                   |           |                   |                 | CRYSTALS         | NEG             | /LPF           | NEG              | /LPF            |
|                   |           |                   |                 | EPITHELIAL CELLS | 0               | /HPF           | 0                | /HPF            |
|                   |           |                   |                 | GLUCOSE          | NEG             |                | NEG              |                 |
|                   |           |                   |                 | HEMOGLOBIN       | NEG             |                | NEG              |                 |
|                   |           |                   |                 | KETONES          | NEG             |                | NEG              | MG/DL           |
|                   |           |                   |                 | PH               | 5.5             |                | 5.5              |                 |
|                   |           |                   |                 | PROTEIN          | NEG             |                | NEG              | MG/DL           |
|                   |           |                   |                 | RED BLOOD CELLS  | 22              | /UL            | 22               | /UL             |
|                   |           |                   |                 | SPECIFIC GRAVITY | 1.018           |                | 1.018            |                 |
|                   |           | WHITE BLOOD CELLS | 9               | /UL              | 9               | /UL            |                  |                 |
|                   |           | Day 6             | 23NOV2009       | BILIRUBIN        | NEG             |                | NEG              |                 |
|                   |           |                   |                 | CASTS            | 4               | /LPF           | 4                | /LPF            |
|                   |           |                   |                 | CRYSTALS         | NEG             | /LPF           | NEG              | /LPF            |
|                   |           |                   |                 | EPITHELIAL CELLS | 0               | /HPF           | 0                | /HPF            |
|                   |           |                   |                 | GLUCOSE          | NEG             |                | NEG              |                 |
|                   |           |                   |                 | HEMOGLOBIN       | NEG             |                | NEG              |                 |
|                   |           |                   |                 | KETONES          | NEG             |                | NEG              | MG/DL           |
|                   |           |                   |                 | PH               | 5.5             |                | 5.5              |                 |
|                   |           |                   |                 | PROTEIN          | TRACES          |                | TRACES           | MG/DL           |
|                   |           |                   |                 | RED BLOOD CELLS  | 15              | /UL            | 15               | /UL             |
| SPECIFIC GRAVITY  | 1.022     |                   | 1.022           |                  |                 |                |                  |                 |
| WHITE BLOOD CELLS | 9         | /UL               | 9               | /UL              |                 |                |                  |                 |
| Day 14            | 02DEC2009 | BILIRUBIN         | NEG             |                  | NEG             |                |                  |                 |

Note: ND=Not Done.



Listing 10.3  
 Laboratory Data: Urinalysis

| Center  | Patient | Visit             | Assessment Date | Parameter         | Recorded Result | Recorded Units | Converted Result | Converted Units |          |      |
|---------|---------|-------------------|-----------------|-------------------|-----------------|----------------|------------------|-----------------|----------|------|
| XVO_003 | 201     | Day 14            | 02DEC2009       | CASTS             | 11              | /LPF           | 11               | /LPF            |          |      |
|         |         |                   |                 | CRYSTALS          | NEG             | /LPF           | NEG              | /LPF            |          |      |
|         |         |                   |                 | EPITHELIAL CELLS  | 0               | /HPF           | 0                | /HPF            |          |      |
|         |         |                   |                 | GLUCOSE           | NEG             |                | NEG              |                 |          |      |
|         |         |                   |                 | HEMOGLOBIN        | NEG             |                | NEG              |                 |          |      |
|         |         |                   |                 | KETONES           | NEG             |                | NEG              | MG/DL           |          |      |
|         |         |                   |                 | PH                | 5.5             |                | 5.5              |                 |          |      |
|         |         |                   |                 | PROTEIN           | NEG             |                | NEG              | MG/DL           |          |      |
|         |         |                   |                 | RED BLOOD CELLS   | 0               | /UL            | 0                | /UL             |          |      |
|         |         |                   |                 | SPECIFIC GRAVITY  | 1.014           |                | 1.014            |                 |          |      |
|         |         |                   |                 | WHITE BLOOD CELLS | 0               | /UL            | 0                | /UL             |          |      |
|         |         |                   |                 | Day 30            | 22DEC2009       | BILIRUBIN      | NEGATIVE         |                 | NEGATIVE |      |
|         |         |                   |                 |                   |                 | CASTS          | 0                | /LPF            | 0        | /LPF |
|         |         |                   |                 |                   |                 | CRYSTALS       | NEG              | /LPF            | NEG      | /LPF |
|         |         | EPITHELIAL CELLS  | 0               |                   |                 | /HPF           | 0                | /HPF            |          |      |
|         |         | GLUCOSE           | NEGATIVE        |                   |                 |                | NEGATIVE         |                 |          |      |
|         |         | HEMOGLOBIN        | NEGATIVE        |                   |                 |                | NEGATIVE         |                 |          |      |
|         |         | KETONES           | NEGATIVE        |                   |                 |                | NEGATIVE         | MG/DL           |          |      |
|         |         | PH                | 5.0             |                   |                 |                | 5.0              |                 |          |      |
|         |         | PROTEIN           | TRACE           |                   |                 |                | TRACE            | MG/DL           |          |      |
|         |         | RED BLOOD CELLS   | 6               |                   |                 | /UL            | 6                | /UL             |          |      |
|         |         | SPECIFIC GRAVITY  | 1.016           |                   |                 |                | 1.016            |                 |          |      |
|         |         | WHITE BLOOD CELLS | 5               |                   |                 | /UL            | 5                | /UL             |          |      |
|         |         | Day 42            | 29DEC2009       |                   |                 | BILIRUBIN      | NEG              |                 | NEG      |      |

Note: ND=Not Done.

Listing 10.3  
 Laboratory Data: Urinalysis

| Center            | Patient        | Visit     | Assessment Date | Parameter         | Recorded Result | Recorded Units | Converted Result | Converted Units |     |      |     |      |
|-------------------|----------------|-----------|-----------------|-------------------|-----------------|----------------|------------------|-----------------|-----|------|-----|------|
| XVO_003           | 201            | Day 42    | 29DEC2009       | CASTS             | 3               | /LPF           | 3                | /LPF            |     |      |     |      |
|                   |                |           |                 | CRYSTALS          | NEG             | /LPF           | NEG              | /LPF            |     |      |     |      |
|                   |                |           |                 | EPITHELIAL CELLS  | 0               | /HPF           | 0                | /HPF            |     |      |     |      |
|                   |                |           |                 | GLUCOSE           | NEG             |                | NEG              |                 |     |      |     |      |
|                   |                |           |                 | HEMOGLOBIN        | NEG             |                | NEG              |                 |     |      |     |      |
|                   |                |           |                 | KETONES           | NEG             |                | NEG              | MG/DL           |     |      |     |      |
|                   |                |           |                 | PH                | 5.5             |                | 5.5              |                 |     |      |     |      |
|                   |                |           |                 | PROTEIN           | NEG             |                | NEG              | MG/DL           |     |      |     |      |
|                   |                |           |                 | RED BLOOD CELLS   | 5               | /UL            | 5                | /UL             |     |      |     |      |
|                   |                |           |                 | SPECIFIC GRAVITY  | 1.015           |                | 1.015            |                 |     |      |     |      |
|                   |                |           |                 | WHITE BLOOD CELLS | 10              | /UL            | 10               | /UL             |     |      |     |      |
|                   |                |           |                 | XVO_005           | 301             | Screening      | 03AUG2009        | BILIRUBIN       | NEG |      | NEG |      |
|                   |                |           |                 |                   |                 |                |                  | CASTS           | 3   | /LPF | 3   | /LPF |
| CRYSTALS          | 0              | /LPF      | 0               |                   |                 |                |                  | /LPF            |     |      |     |      |
| EPITHELIAL CELLS  | 0              | /HPF      | 0               |                   |                 |                |                  | /HPF            |     |      |     |      |
| GLUCOSE           | NEG            |           | NEG             |                   |                 |                |                  |                 |     |      |     |      |
| HEMOGLOBIN        | NONE           |           | NONE            |                   |                 |                |                  |                 |     |      |     |      |
| KETONES           | NEG            |           | NEG             |                   |                 |                |                  | MG/DL           |     |      |     |      |
| PH                | 5.0            |           | 5.0             |                   |                 |                |                  |                 |     |      |     |      |
| PROTEIN           | NEG            |           | NEG             |                   |                 |                |                  | MG/DL           |     |      |     |      |
| RED BLOOD CELLS   | 1              | /HPF      | 1               |                   |                 |                |                  | /UL             |     |      |     |      |
| SPECIFIC GRAVITY  | 1.025          |           | 1.025           |                   |                 |                |                  |                 |     |      |     |      |
| WHITE BLOOD CELLS | 0              | /HPF      | 0               |                   |                 |                |                  | /UL             |     |      |     |      |
|                   |                |           |                 |                   |                 |                |                  |                 |     |      |     |      |
|                   | Day 0 Pre-dose | 04AUG2009 | BILIRUBIN       |                   |                 | NEG            |                  | NEG             |     |      |     |      |

Note: ND=Not Done.

Listing 10.3  
 Laboratory Data: Urinalysis

| Center            | Patient   | Visit             | Assessment Date | Parameter        | Recorded Result | Recorded Units | Converted Result | Converted Units |
|-------------------|-----------|-------------------|-----------------|------------------|-----------------|----------------|------------------|-----------------|
| XVO_005           | 301       | Day 0 Pre-dose    | 04AUG2009       | CASTS            | 0               | /LPF           | 0                | /LPF            |
|                   |           |                   |                 | CRYSTALS         | NONE            | /LPF           | NONE             | /LPF            |
|                   |           |                   |                 | EPITHELIAL CELLS | 1               | /HPF           | 1                | /HPF            |
|                   |           |                   |                 | GLUCOSE          | NEG             |                | NEG              |                 |
|                   |           |                   |                 | HEMOGLOBIN       | NONE            |                | NONE             |                 |
|                   |           |                   |                 | KETONES          | NEG             |                | NEG              | MG/DL           |
|                   |           |                   |                 | PH               | 5.0             |                | 5.0              |                 |
|                   |           |                   |                 | PROTEIN          | NEG             |                | NEG              | MG/DL           |
|                   |           |                   |                 | RED BLOOD CELLS  | 0               | /HPF           | 0                | /UL             |
|                   |           |                   |                 | SPECIFIC GRAVITY | 1.020           |                | 1.020            |                 |
|                   |           | WHITE BLOOD CELLS | 0               | /HPF             | 0               | /UL            |                  |                 |
|                   |           | Day 6             | 10AUG2009       | BILIRUBIN        | NEG             |                | NEG              |                 |
|                   |           |                   |                 | CASTS            | 5               | /LPF           | 5                | /LPF            |
|                   |           |                   |                 | CRYSTALS         | NONE            | /LPF           | NONE             | /LPF            |
|                   |           |                   |                 | EPITHELIAL CELLS | 3               | /HPF           | 3                | /HPF            |
|                   |           |                   |                 | GLUCOSE          | NEG             |                | NEG              |                 |
|                   |           |                   |                 | HEMOGLOBIN       | NONE            |                | NONE             |                 |
|                   |           |                   |                 | KETONES          | NEG             |                | NEG              | MG/DL           |
|                   |           |                   |                 | PH               | 5.0             |                | 5.0              |                 |
|                   |           |                   |                 | PROTEIN          | TRACE           |                | TRACE            | MG/DL           |
|                   |           |                   |                 | RED BLOOD CELLS  | 1               | /HPF           | 1                | /UL             |
| SPECIFIC GRAVITY  | 1.030     |                   | 1.030           |                  |                 |                |                  |                 |
| WHITE BLOOD CELLS | 1         | /HPF              | 1               | /UL              |                 |                |                  |                 |
| Day 14            | 18AUG2009 | BILIRUBIN         | NEG             |                  | NEG             |                |                  |                 |

Note: ND=Not Done.

Listing 10.3  
 Laboratory Data: Urinalysis

| Center            | Patient   | Visit             | Assessment Date | Parameter        | Recorded Result | Recorded Units | Converted Result | Converted Units |
|-------------------|-----------|-------------------|-----------------|------------------|-----------------|----------------|------------------|-----------------|
| XVO_005           | 301       | Day 14            | 18AUG2009       | CASTS            | 2               | /LPF           | 2                | /LPF            |
|                   |           |                   |                 | CRYSTALS         | NONE            | /LPF           | NONE             | /LPF            |
|                   |           |                   |                 | EPITHELIAL CELLS | 0               | /HPF           | 0                | /HPF            |
|                   |           |                   |                 | GLUCOSE          | NEG             |                | NEG              |                 |
|                   |           |                   |                 | HEMOGLOBIN       | NONE            |                | NONE             |                 |
|                   |           |                   |                 | KETONES          | NEG             |                | NEG              | MG/DL           |
|                   |           |                   |                 | PH               | 5.0             |                | 5.0              |                 |
|                   |           |                   |                 | PROTEIN          | NEG             |                | NEG              | MG/DL           |
|                   |           |                   |                 | RED BLOOD CELLS  | 1               | /HPF           | 1                | /UL             |
|                   |           |                   |                 | SPECIFIC GRAVITY | >1.030          |                | >1.030           |                 |
|                   |           | WHITE BLOOD CELLS | 1               | /HPF             | 1               | /UL            |                  |                 |
|                   |           | Day 30            | 04SEP2009       | BILIRUBIN        | NEG             |                | NEG              |                 |
|                   |           |                   |                 | CASTS            | 0               | /LPF           | 0                | /LPF            |
|                   |           |                   |                 | CRYSTALS         | NONE            | /LPF           | NONE             | /LPF            |
|                   |           |                   |                 | EPITHELIAL CELLS | 0               | /HPF           | 0                | /HPF            |
|                   |           |                   |                 | GLUCOSE          | TRACE           |                | TRACE            |                 |
|                   |           |                   |                 | HEMOGLOBIN       | NONE            |                | NONE             |                 |
|                   |           |                   |                 | KETONES          | NEG             |                | NEG              | MG/DL           |
|                   |           |                   |                 | PH               | 5.5             |                | 5.5              |                 |
|                   |           |                   |                 | PROTEIN          | NEG             |                | NEG              | MG/DL           |
| RED BLOOD CELLS   | 0         |                   |                 | /HPF             | 0               | /UL            |                  |                 |
| SPECIFIC GRAVITY  | 1.015     |                   | 1.015           |                  |                 |                |                  |                 |
| WHITE BLOOD CELLS | 0         | /HPF              | 0               | /UL              |                 |                |                  |                 |
| Day 42            | 15SEP2009 | BILIRUBIN         | NEG             |                  | NEG             |                |                  |                 |

Note: ND=Not Done.

Listing 10.3  
 Laboratory Data: Urinalysis

| Center            | Patient           | Visit     | Assessment Date | Parameter        | Recorded Result | Recorded Units | Converted Result | Converted Units |
|-------------------|-------------------|-----------|-----------------|------------------|-----------------|----------------|------------------|-----------------|
| XVO_005           | 301               | Day 42    | 15SEP2009       | CASTS            | ND              | /LPF           | ND               | /LPF            |
|                   |                   |           |                 | CRYSTALS         | NONE            | /LPF           | NONE             | /LPF            |
|                   |                   |           |                 | EPITHELIAL CELLS | 1               | /HPF           | 1                | /HPF            |
|                   |                   |           |                 | GLUCOSE          | NEG             |                | NEG              |                 |
|                   |                   |           |                 | HEMOGLOBIN       | NONE            |                | NONE             |                 |
|                   |                   |           |                 | KETONES          | NEG             |                | NEG              | MG/DL           |
|                   |                   |           |                 | PH               | 5.5             |                | 5.5              |                 |
|                   |                   |           |                 | PROTEIN          | NEG             |                | NEG              | MG/DL           |
|                   |                   |           |                 | RED BLOOD CELLS  | 1               | /HPF           | 1                | /UL             |
|                   |                   |           |                 | SPECIFIC GRAVITY | 1.025           |                | 1.025            |                 |
|                   | WHITE BLOOD CELLS | 1         | /HPF            | 1                | /UL             |                |                  |                 |
|                   | 302               | Screening | 14DEC2009       | BILIRUBIN        | NEG             |                | NEG              |                 |
|                   |                   |           |                 | CASTS            | 0               | /LPF           | 0                | /LPF            |
|                   |                   |           |                 | CRYSTALS         | 0               | /LPF           | 0                | /LPF            |
|                   |                   |           |                 | EPITHELIAL CELLS | 1               | /HPF           | 1                | /HPF            |
|                   |                   |           |                 | GLUCOSE          | NEG             |                | NEG              |                 |
|                   |                   |           |                 | HEMOGLOBIN       | NONE            |                | NONE             |                 |
|                   |                   |           |                 | KETONES          | NEG             |                | NEG              | MG/DL           |
|                   |                   |           |                 | PH               | 6.5             |                | 6.5              |                 |
|                   |                   |           |                 | PROTEIN          | 1+              |                | 1+               | MG/DL           |
| RED BLOOD CELLS   |                   |           |                 | 5                | /HPF            | 5              | /UL              |                 |
| SPECIFIC GRAVITY  | 1.017             |           | 1.017           |                  |                 |                |                  |                 |
| WHITE BLOOD CELLS | 4                 | /HPF      | 4               | /UL              |                 |                |                  |                 |
|                   | Day 0 Pre-dose    | 15DEC2009 | BILIRUBIN       | NEG              |                 | NEG            |                  |                 |

Note: ND=Not Done.

Listing 10.3  
 Laboratory Data: Urinalysis

| Center            | Patient | Visit            | Assessment Date | Parameter         | Recorded Result | Recorded Units | Converted Result | Converted Units |     |      |
|-------------------|---------|------------------|-----------------|-------------------|-----------------|----------------|------------------|-----------------|-----|------|
| XVO_005           | 302     | Day 0 Pre-dose   | 15DEC2009       | CASTS             | 1               | /LPF           | 1                | /LPF            |     |      |
|                   |         |                  |                 | CRYSTALS          | 0               | /LPF           | 0                | /LPF            |     |      |
|                   |         |                  |                 | EPITHELIAL CELLS  | 1               | /HPF           | 1                | /HPF            |     |      |
|                   |         |                  |                 | GLUCOSE           | NEG             |                | NEG              |                 |     |      |
|                   |         |                  |                 | HEMOGLOBIN        | NONE            |                | NONE             |                 |     |      |
|                   |         |                  |                 | KETONES           | NEG             |                | NEG              | MG/DL           |     |      |
|                   |         |                  |                 | PH                | 6.5             |                | 6.5              |                 |     |      |
|                   |         |                  |                 | PROTEIN           | NEG             |                | NEG              | MG/DL           |     |      |
|                   |         |                  |                 | RED BLOOD CELLS   | 4               | /HPF           | 4                | /UL             |     |      |
|                   |         |                  |                 | SPECIFIC GRAVITY  | 1.015           |                | 1.015            |                 |     |      |
|                   |         |                  |                 | WHITE BLOOD CELLS | 3               | /HPF           | 3                | /UL             |     |      |
|                   |         |                  |                 | Day 6             | 21DEC2009       | BILIRUBIN      | NEG              |                 | NEG |      |
|                   |         |                  |                 |                   |                 | CASTS          | 0                | /LPF            | 0   | /LPF |
|                   |         | CRYSTALS         | 0               |                   |                 | /LPF           | 0                | /LPF            |     |      |
|                   |         | EPITHELIAL CELLS | 0               |                   |                 | /HPF           | 0                | /HPF            |     |      |
|                   |         | GLUCOSE          | NEG             |                   |                 |                | NEG              |                 |     |      |
|                   |         | HEMOGLOBIN       | NONE            |                   |                 |                | NONE             |                 |     |      |
|                   |         | KETONES          | NEG             |                   |                 |                | NEG              | MG/DL           |     |      |
|                   |         | PH               | 6.0             |                   |                 |                | 6.0              |                 |     |      |
|                   |         | Day 14           | 29DEC2009       | BILIRUBIN         | NEG             |                | NEG              |                 |     |      |
|                   |         |                  |                 | PROTEIN           | NEG             |                | NEG              | MG/DL           |     |      |
| RED BLOOD CELLS   | 2       |                  |                 | /HPF              | 2               | /UL            |                  |                 |     |      |
| SPECIFIC GRAVITY  | 1.013   |                  |                 |                   | 1.013           |                |                  |                 |     |      |
| WHITE BLOOD CELLS | 3       |                  |                 | /HPF              | 3               | /UL            |                  |                 |     |      |

Note: ND=Not Done.

Listing 10.3  
 Laboratory Data: Urinalysis

| Center  | Patient | Visit             | Assessment Date | Parameter         | Recorded Result | Recorded Units | Converted Result | Converted Units |     |      |
|---------|---------|-------------------|-----------------|-------------------|-----------------|----------------|------------------|-----------------|-----|------|
| XVO_005 | 302     | Day 14            | 29DEC2009       | CASTS             | 0               | /LPF           | 0                | /LPF            |     |      |
|         |         |                   |                 | CRYSTALS          | 0               | /LPF           | 0                | /LPF            |     |      |
|         |         |                   |                 | EPITHELIAL CELLS  | 0               | /HPF           | 0                | /HPF            |     |      |
|         |         |                   |                 | GLUCOSE           | NEG             |                | NEG              |                 |     |      |
|         |         |                   |                 | HEMOGLOBIN        | NONE            |                | NONE             |                 |     |      |
|         |         |                   |                 | KETONES           | NEG             |                | NEG              | MG/DL           |     |      |
|         |         |                   |                 | PH                | 6.0             |                | 6.0              |                 |     |      |
|         |         |                   |                 | PROTEIN           | NEG             |                | NEG              | MG/DL           |     |      |
|         |         |                   |                 | RED BLOOD CELLS   | 3               | /HPF           | 3                | /UL             |     |      |
|         |         |                   |                 | SPECIFIC GRAVITY  | 1.016           |                | 1.016            |                 |     |      |
|         |         |                   |                 | WHITE BLOOD CELLS | 2               | /HPF           | 2                | /UL             |     |      |
|         |         |                   |                 | Day 30            | 15JAN2010       | BILIRUBIN      | NEG              |                 | NEG |      |
|         |         |                   |                 |                   |                 | CASTS          | 0                | /LPF            | 0   | /LPF |
|         |         |                   |                 |                   |                 | CRYSTALS       | 0                | /LPF            | 0   | /LPF |
|         |         | EPITHELIAL CELLS  | 0               |                   |                 | /HPF           | 0                | /HPF            |     |      |
|         |         | GLUCOSE           | NEG             |                   |                 |                | NEG              |                 |     |      |
|         |         | HEMOGLOBIN        | NONE            |                   |                 |                | NONE             |                 |     |      |
|         |         | KETONES           | NEG             |                   |                 |                | NEG              | MG/DL           |     |      |
|         |         | PH                | 6.0             |                   |                 |                | 6.0              |                 |     |      |
|         |         | PROTEIN           | TRACE           |                   |                 |                | TRACE            | MG/DL           |     |      |
|         |         | RED BLOOD CELLS   | 5.0             |                   |                 | /HPF           | 5.0              | /UL             |     |      |
|         |         | SPECIFIC GRAVITY  | 1.018           |                   |                 |                | 1.018            |                 |     |      |
|         |         | WHITE BLOOD CELLS | 2.0             |                   |                 | /HPF           | 2.0              | /UL             |     |      |
|         |         | Day 42            | 25JAN2010       |                   |                 | BILIRUBIN      | NEG              |                 | NEG |      |

Note: ND=Not Done.

Listing 10.3  
Laboratory Data: Urinalysis

| Center            | Patient          | Visit     | Assessment Date  | Parameter         | Recorded Result | Recorded Units | Converted Result | Converted Units |           |      |           |      |
|-------------------|------------------|-----------|------------------|-------------------|-----------------|----------------|------------------|-----------------|-----------|------|-----------|------|
| XVO_005           | 302              | Day 42    | 25JAN2010        | CASTS             | 0               | /LPF           | 0                | /LPF            |           |      |           |      |
|                   |                  |           |                  | CRYSTALS          | 0               | /LPF           | 0                | /LPF            |           |      |           |      |
|                   |                  |           |                  | EPITHELIAL CELLS  | 0               | /HPF           | 0                | /HPF            |           |      |           |      |
|                   |                  |           |                  | GLUCOSE           | NEG             |                | NEG              |                 |           |      |           |      |
|                   |                  |           |                  | HEMOGLOBIN        | NONE            |                | NONE             |                 |           |      |           |      |
|                   |                  |           |                  | KETONES           | NEG             |                | NEG              | MG/DL           |           |      |           |      |
|                   |                  |           |                  | PH                | 6.0             |                | 6.0              |                 |           |      |           |      |
|                   |                  |           |                  | PROTEIN           | TRACE           |                | TRACE            | MG/DL           |           |      |           |      |
|                   |                  |           |                  | RED BLOOD CELLS   | 5               | /HPF           | 5                | /UL             |           |      |           |      |
|                   |                  |           |                  | SPECIFIC GRAVITY  | 1.020           |                | 1.020            |                 |           |      |           |      |
|                   |                  |           |                  | WHITE BLOOD CELLS | 2               | /HPF           | 2                | /UL             |           |      |           |      |
|                   |                  |           |                  | XVO_007           | 401             | Screening      | 04NOV2009        | BILIRUBIN       | NEGATIVE  |      | NEGATIVE  |      |
|                   |                  |           |                  |                   |                 |                |                  | CASTS           | NONE SEEN | /LPF | NONE SEEN | /LPF |
| CRYSTALS          | AMORPHOUS URATES | /LPF      | AMORPHOUS URATES |                   |                 |                |                  | /LPF            |           |      |           |      |
| EPITHELIAL CELLS  | RARE             | /HPF      | RARE             |                   |                 |                |                  | /HPF            |           |      |           |      |
| GLUCOSE           | NEGATIVE         |           | NEGATIVE         |                   |                 |                |                  |                 |           |      |           |      |
| HEMOGLOBIN        | NEGATIVE         |           | NEGATIVE         |                   |                 |                |                  |                 |           |      |           |      |
| KETONES           | NEGATIVE         |           | NEGATIVE         |                   |                 |                |                  | MG/DL           |           |      |           |      |
| PH                | 6.0              |           | 6.0              |                   |                 |                |                  |                 |           |      |           |      |
| PROTEIN           | NEGATIVE         |           | NEGATIVE         |                   |                 |                |                  | MG/DL           |           |      |           |      |
| RED BLOOD CELLS   | <2               | /HPF      | <2               |                   |                 |                |                  | /UL             |           |      |           |      |
| SPECIFIC GRAVITY  | 1.025            |           | 1.025            |                   |                 |                |                  |                 |           |      |           |      |
| WHITE BLOOD CELLS | <2               | /HPF      | <2               |                   |                 |                |                  | /UL             |           |      |           |      |
| Day 0 Pre-dose    | 10NOV2009        | BILIRUBIN | NEGATIVE         |                   |                 |                |                  |                 | NEGATIVE  |      |           |      |

Note: ND=Not Done.



Listing 10.3  
 Laboratory Data: Urinalysis

| Center            | Patient  | Visit            | Assessment Date | Parameter         | Recorded Result | Recorded Units | Converted Result | Converted Units |          |      |
|-------------------|----------|------------------|-----------------|-------------------|-----------------|----------------|------------------|-----------------|----------|------|
| XVO_007           | 401      | Day 0 Pre-dose   | 10NOV2009       | CASTS             | NONE SEEN       | /LPF           | NONE SEEN        | /LPF            |          |      |
|                   |          |                  |                 | CRYSTALS          | NONE SEEN       | /LPF           | NONE SEEN        | /LPF            |          |      |
|                   |          |                  |                 | EPITHELIAL CELLS  | NONE SEEN       | /HPF           | NONE SEEN        | /HPF            |          |      |
|                   |          |                  |                 | GLUCOSE           | NEGATIVE        |                | NEGATIVE         |                 |          |      |
|                   |          |                  |                 | HEMOGLOBIN        | NEGATIVE        |                | NEGATIVE         |                 |          |      |
|                   |          |                  |                 | KETONES           | NEGATIVE        |                | NEGATIVE         | MG/DL           |          |      |
|                   |          |                  |                 | PH                | 6.0             |                | 6.0              |                 |          |      |
|                   |          |                  |                 | PROTEIN           | NEGATIVE        |                | NEGATIVE         | MG/DL           |          |      |
|                   |          |                  |                 | RED BLOOD CELLS   | <2              | /HPF           | <2               | /UL             |          |      |
|                   |          |                  |                 | SPECIFIC GRAVITY  | 1.020           |                | 1.020            |                 |          |      |
|                   |          |                  |                 | WHITE BLOOD CELLS | <2              | /HPF           | <2               | /UL             |          |      |
|                   |          |                  |                 | Day 6             | 16NOV2009       | BILIRUBIN      | NEGATIVE         |                 | NEGATIVE |      |
|                   |          |                  |                 |                   |                 | CASTS          | NONE             | /LPF            | NONE     | /LPF |
|                   |          | CRYSTALS         | NONE            |                   |                 | /LPF           | NONE             | /LPF            |          |      |
|                   |          | EPITHELIAL CELLS | FEW SQUAMOUS    |                   |                 | /HPF           | FEW SQUAMOUS     | /HPF            |          |      |
|                   |          | GLUCOSE          | NEGATIVE        |                   |                 |                | NEGATIVE         |                 |          |      |
|                   |          | HEMOGLOBIN       | NEGATIVE        |                   |                 |                | NEGATIVE         |                 |          |      |
|                   |          | KETONES          | NEGATIVE        |                   |                 |                | NEGATIVE         | MG/DL           |          |      |
|                   |          | PH               | 5.0             |                   |                 |                | 5.0              |                 |          |      |
|                   |          | Day 14           | 24NOV2009       | PROTEIN           | NEGATIVE        |                | NEGATIVE         | MG/DL           |          |      |
|                   |          |                  |                 | RED BLOOD CELLS   | <2              | /HPF           | <2               | /UL             |          |      |
| SPECIFIC GRAVITY  | 1.020    |                  |                 |                   | 1.020           |                |                  |                 |          |      |
| WHITE BLOOD CELLS | <2       |                  |                 | /HPF              | <2              | /UL            |                  |                 |          |      |
| BILIRUBIN         | NEGATIVE |                  |                 |                   | NEGATIVE        |                |                  |                 |          |      |

Note: ND=Not Done.

Listing 10.3  
Laboratory Data: Urinalysis

| Center           | Patient        | Visit            | Assessment Date | Parameter         | Recorded Result | Recorded Units | Converted Result | Converted Units |           |      |
|------------------|----------------|------------------|-----------------|-------------------|-----------------|----------------|------------------|-----------------|-----------|------|
| XVO_007          | 401            | Day 14           | 24NOV2009       | CASTS             | NONE SEEN       | /LPF           | NONE SEEN        | /LPF            |           |      |
|                  |                |                  |                 | CRYSTALS          | NONE SEEN       | /LPF           | NONE SEEN        | /LPF            |           |      |
|                  |                |                  |                 | EPITHELIAL CELLS  | RARE            | /HPF           | RARE             | /HPF            |           |      |
|                  |                |                  |                 | GLUCOSE           | NEGATIVE        |                | NEGATIVE         |                 |           |      |
|                  |                |                  |                 | HEMOGLOBIN        | NEGATIVE        |                | NEGATIVE         |                 |           |      |
|                  |                |                  |                 | KETONES           | NEGATIVE        |                | NEGATIVE         | MG/DL           |           |      |
|                  |                |                  |                 | PH                | 6.0             |                | 6.0              |                 |           |      |
|                  |                |                  |                 | PROTEIN           | NEGATIVE        |                | NEGATIVE         | MG/DL           |           |      |
|                  |                |                  |                 | RED BLOOD CELLS   | <2              | /HPF           | <2               | /UL             |           |      |
|                  |                |                  |                 | SPECIFIC GRAVITY  | 1.015           |                | 1.015            |                 |           |      |
|                  |                |                  |                 | WHITE BLOOD CELLS | <2              | /HPF           | <2               | /UL             |           |      |
|                  |                |                  |                 | Day 30            | 08DEC2009       | BILIRUBIN      | NEGATIVE         |                 | NEGATIVE  |      |
|                  |                |                  |                 |                   |                 | CASTS          | NONE SEEN        | /LPF            | NONE SEEN | /LPF |
|                  |                | CRYSTALS         | MANY AMORPHOUS  |                   |                 | /LPF           | MANY AMORPHOUS   | /LPF            |           |      |
|                  |                | EPITHELIAL CELLS | NONE SEEN       |                   |                 | /HPF           | NONE SEEN        | /HPF            |           |      |
|                  |                | GLUCOSE          | NEGATIVE        |                   |                 |                | NEGATIVE         |                 |           |      |
|                  |                | HEMOGLOBIN       | NEGATIVE        |                   |                 |                | NEGATIVE         |                 |           |      |
|                  |                | KETONES          | NEGATIVE        |                   |                 |                | NEGATIVE         | MG/DL           |           |      |
|                  |                | PH               | 6.0             |                   |                 |                | 6.0              |                 |           |      |
|                  |                | Day 42           | 22DEC2009       | BILIRUBIN         | NEGATIVE        |                | NEGATIVE         |                 |           |      |
|                  |                |                  |                 | CASTS             | NONE SEEN       | /LPF           | NONE SEEN        | /LPF            |           |      |
| CRYSTALS         | MANY AMORPHOUS |                  |                 | /LPF              | MANY AMORPHOUS  | /LPF           |                  |                 |           |      |
| EPITHELIAL CELLS | NONE SEEN      |                  |                 | /HPF              | NONE SEEN       | /HPF           |                  |                 |           |      |
| GLUCOSE          | NEGATIVE       |                  |                 |                   | NEGATIVE        |                |                  |                 |           |      |

Note: ND=Not Done.

Listing 10.3  
Laboratory Data: Urinalysis

| Center            | Patient           | Visit     | Assessment Date | Parameter        | Recorded Result    | Recorded Units | Converted Result   | Converted Units |
|-------------------|-------------------|-----------|-----------------|------------------|--------------------|----------------|--------------------|-----------------|
| XVO_007           | 401               | Day 42    | 22DEC2009       | CASTS            | NONE SEEN          | /LPF           | NONE SEEN          | /LPF            |
|                   |                   |           |                 | CRYSTALS         | NONE SEEN          | /LPF           | NONE SEEN          | /LPF            |
|                   |                   |           |                 | EPITHELIAL CELLS | RARE SQUAMOUS CELL | /HPF           | RARE SQUAMOUS CELL | /HPF            |
|                   |                   |           |                 | GLUCOSE          | NEGATIVE           |                | NEGATIVE           |                 |
|                   |                   |           |                 | HEMOGLOBIN       | NEGATIVE           |                | NEGATIVE           |                 |
|                   |                   |           |                 | KETONES          | NEGATIVE           |                | NEGATIVE           | MG/DL           |
|                   |                   |           |                 | PH               | 5.0                |                | 5.0                |                 |
|                   |                   |           |                 | PROTEIN          | NEGATIVE           |                | NEGATIVE           | MG/DL           |
|                   |                   |           |                 | RED BLOOD CELLS  | <2                 | /HPF           | <2                 | /UL             |
|                   |                   |           |                 | SPECIFIC GRAVITY | 1.020              |                | 1.020              |                 |
|                   | WHITE BLOOD CELLS | <2        | /HPF            | <2               | /UL                |                |                    |                 |
|                   | 402               | Screening | 03DEC2009       | BILIRUBIN        | NEGATIVE           |                | NEGATIVE           |                 |
|                   |                   |           |                 | CASTS            | NONE SEEN          | /LPF           | NONE SEEN          | /LPF            |
|                   |                   |           |                 | CRYSTALS         | NONE SEEN          | /LPF           | NONE SEEN          | /LPF            |
|                   |                   |           |                 | EPITHELIAL CELLS | NONE SEEN          | /HPF           | NONE SEEN          | /HPF            |
|                   |                   |           |                 | GLUCOSE          | NEGATIVE           |                | NEGATIVE           |                 |
|                   |                   |           |                 | HEMOGLOBIN       | NEGATIVE           |                | NEGATIVE           |                 |
|                   |                   |           |                 | KETONES          | NEGATIVE           |                | NEGATIVE           | MG/DL           |
|                   |                   |           |                 | PH               | 6.0                |                | 6.0                |                 |
|                   |                   |           |                 | PROTEIN          | NEGATIVE           |                | NEGATIVE           | MG/DL           |
| RED BLOOD CELLS   |                   |           |                 | <2               | /HPF               | <2             | /UL                |                 |
| SPECIFIC GRAVITY  | 1.010             |           | 1.010           |                  |                    |                |                    |                 |
| WHITE BLOOD CELLS | <2                | /HPF      | <2              | /UL              |                    |                |                    |                 |
|                   | Day 0 Pre-dose    | 08DEC2009 | BILIRUBIN       | NEGATIVE         |                    | NEGATIVE       |                    |                 |

Note: ND=Not Done.

Listing 10.3  
 Laboratory Data: Urinalysis

| Center            | Patient | Visit            | Assessment Date | Parameter         | Recorded Result | Recorded Units | Converted Result | Converted Units |      |      |
|-------------------|---------|------------------|-----------------|-------------------|-----------------|----------------|------------------|-----------------|------|------|
| XVO_007           | 402     | Day 0 Pre-dose   | 08DEC2009       | CASTS             | NONE SEEN       | /LPF           | NONE SEEN        | /LPF            |      |      |
|                   |         |                  |                 | CRYSTALS          | NONE SEEN       | /LPF           | NONE SEEN        | /LPF            |      |      |
|                   |         |                  |                 | EPITHELIAL CELLS  | RARE            | /HPF           | RARE             | /HPF            |      |      |
|                   |         |                  |                 | GLUCOSE           | NEGATIVE        |                | NEGATIVE         |                 |      |      |
|                   |         |                  |                 | HEMOGLOBIN        | NEGATIVE        |                | NEGATIVE         |                 |      |      |
|                   |         |                  |                 | KETONES           | NEGATIVE        |                | NEGATIVE         | MG/DL           |      |      |
|                   |         |                  |                 | PH                | 6.0             |                | 6.0              |                 |      |      |
|                   |         |                  |                 | PROTEIN           | NEGATIVE        |                | NEGATIVE         | MG/DL           |      |      |
|                   |         |                  |                 | RED BLOOD CELLS   | <2              | /HPF           | <2               | /UL             |      |      |
|                   |         |                  |                 | SPECIFIC GRAVITY  | 1.015           |                | 1.015            |                 |      |      |
|                   |         |                  |                 | WHITE BLOOD CELLS | 2 TO 5          | /HPF           | 2 TO 5           | /UL             |      |      |
|                   |         |                  |                 | Day 6             | 14DEC2009       | BILIRUBIN      | NEG              |                 | NEG  |      |
|                   |         |                  |                 |                   |                 | CASTS          | NONE             | /LPF            | NONE | /LPF |
|                   |         | CRYSTALS         | NONE            |                   |                 | /LPF           | NONE             | /LPF            |      |      |
|                   |         | EPITHELIAL CELLS | NONE            |                   |                 | /HPF           | NONE             | /HPF            |      |      |
|                   |         | GLUCOSE          | NEG             |                   |                 |                | NEG              |                 |      |      |
|                   |         | HEMOGLOBIN       | NEG             |                   |                 |                | NEG              |                 |      |      |
|                   |         | KETONES          | NEG             |                   |                 |                | NEG              | MG/DL           |      |      |
|                   |         | PH               | 8.0             |                   |                 |                | 8.0              |                 |      |      |
|                   |         | Day 14           | 22DEC2009       | BILIRUBIN         | NEGATIVE        |                | NEGATIVE         |                 |      |      |
|                   |         |                  |                 | PROTEIN           | NEG             |                | NEG              | MG/DL           |      |      |
| RED BLOOD CELLS   | <2      |                  |                 | /HPF              | <2              | /UL            |                  |                 |      |      |
| SPECIFIC GRAVITY  | 1.010   |                  |                 |                   | 1.010           |                |                  |                 |      |      |
| WHITE BLOOD CELLS | <2      |                  |                 | /HPF              | <2              | /UL            |                  |                 |      |      |

Note: ND=Not Done.

Listing 10.3  
 Laboratory Data: Urinalysis

| Center            | Patient  | Visit            | Assessment Date | Parameter         | Recorded Result | Recorded Units | Converted Result | Converted Units |           |      |
|-------------------|----------|------------------|-----------------|-------------------|-----------------|----------------|------------------|-----------------|-----------|------|
| XVO_007           | 402      | Day 14           | 22DEC2009       | CASTS             | NONE SEEN       | /LPF           | NONE SEEN        | /LPF            |           |      |
|                   |          |                  |                 | CRYSTALS          | NONE SEEN       | /LPF           | NONE SEEN        | /LPF            |           |      |
|                   |          |                  |                 | EPITHELIAL CELLS  | NONE SEEN       | /HPF           | NONE SEEN        | /HPF            |           |      |
|                   |          |                  |                 | GLUCOSE           | NEGATIVE        |                | NEGATIVE         |                 |           |      |
|                   |          |                  |                 | HEMOGLOBIN        | NEGATIVE        |                | NEGATIVE         |                 |           |      |
|                   |          |                  |                 | KETONES           | NEGATIVE        |                | NEGATIVE         | MG/DL           |           |      |
|                   |          |                  |                 | PH                | 6.0             |                | 6.0              |                 |           |      |
|                   |          |                  |                 | PROTEIN           | NEGATIVE        |                | NEGATIVE         | MG/DL           |           |      |
|                   |          |                  |                 | RED BLOOD CELLS   | <2              | /HPF           | <2               | /UL             |           |      |
|                   |          |                  |                 | SPECIFIC GRAVITY  | 1.010           |                | 1.010            |                 |           |      |
|                   |          |                  |                 | WHITE BLOOD CELLS | <2              | /HPF           | <2               | /UL             |           |      |
|                   |          |                  |                 | Day 30            | 05JAN2010       | BILIRUBIN      | NEGATIVE         |                 | NEGATIVE  |      |
|                   |          |                  |                 |                   |                 | CASTS          | NONE SEEN        | /LPF            | NONE SEEN | /LPF |
|                   |          | CRYSTALS         | NONE SEEN       |                   |                 | /LPF           | NONE SEEN        | /LPF            |           |      |
|                   |          | EPITHELIAL CELLS | NONE SEEN       |                   |                 | /HPF           | NONE SEEN        | /HPF            |           |      |
|                   |          | GLUCOSE          | NEGATIVE        |                   |                 |                | NEGATIVE         |                 |           |      |
|                   |          | HEMOGLOBIN       | NEGATIVE        |                   |                 |                | NEGATIVE         |                 |           |      |
|                   |          | Day 42           | 19JAN2010       | KETONES           | NEGATIVE        |                | NEGATIVE         | MG/DL           |           |      |
|                   |          |                  |                 | PH                | 6.0             |                | 6.0              |                 |           |      |
| PROTEIN           | NEGATIVE |                  |                 |                   | NEGATIVE        | MG/DL          |                  |                 |           |      |
| RED BLOOD CELLS   | <2       |                  |                 | /HPF              | <2              | /UL            |                  |                 |           |      |
| SPECIFIC GRAVITY  | 1.015    |                  |                 |                   | 1.015           |                |                  |                 |           |      |
| WHITE BLOOD CELLS | <2       |                  |                 | /HPF              | <2              | /UL            |                  |                 |           |      |
| BILIRUBIN         | NEGATIVE |                  |                 |                   | NEGATIVE        |                |                  |                 |           |      |

Note: ND=Not Done.

Listing 10.3  
 Laboratory Data: Urinalysis

| Center  | Patient | Visit  | Assessment Date | Parameter         | Recorded Result | Recorded Units | Converted Result | Converted Units |
|---------|---------|--------|-----------------|-------------------|-----------------|----------------|------------------|-----------------|
| XVO_007 | 402     | Day 42 | 19JAN2010       | CASTS             | NONE SEEN       | /LPF           | NONE SEEN        | /LPF            |
|         |         |        |                 | CRYSTALS          | NONE SEEN       | /LPF           | NONE SEEN        | /LPF            |
|         |         |        |                 | EPITHELIAL CELLS  | NONE SEEN       | /HPF           | NONE SEEN        | /HPF            |
|         |         |        |                 | GLUCOSE           | NEGATIVE        |                | NEGATIVE         |                 |
|         |         |        |                 | HEMOGLOBIN        | NEGATIVE        |                | NEGATIVE         |                 |
|         |         |        |                 | KETONES           | NEGATIVE        |                | NEGATIVE         | MG/DL           |
|         |         |        |                 | PH                | 7.0             |                | 7.0              |                 |
|         |         |        |                 | PROTEIN           | NEGATIVE        |                | NEGATIVE         | MG/DL           |
|         |         |        |                 | RED BLOOD CELLS   | <2              | /HPF           | <2               | /UL             |
|         |         |        |                 | SPECIFIC GRAVITY  | 1.005           |                | 1.005            |                 |
|         |         |        |                 | WHITE BLOOD CELLS | <2              | /HPF           | <2               | /UL             |

Note: ND=Not Done.

Listing 10.4  
Laboratory Data: Lipids

| Center  | Patient           | Visit             | Assessment Date   | Parameter         | Recorded Result | Recorded Units | Converted Result | Converted Units |
|---------|-------------------|-------------------|-------------------|-------------------|-----------------|----------------|------------------|-----------------|
| XVO_001 | 101               | Day 0<br>Pre-dose | 10NOV2009         | HDL               | 43              | MG/DL          | 43               | MG/DL           |
|         |                   |                   |                   | LDL               | 133             | MG/DL          | 133              | MG/DL           |
|         |                   |                   |                   | TOTAL CHOLESTEROL | 193             | MG/DL          | 193              | MG/DL           |
|         |                   |                   |                   | TRIGLYCERIDES     | 83              | MG/DL          | 83               | MG/DL           |
|         |                   | Day 3             | 13NOV2009         | HDL               | 041             | MG/DL          | 041              | MG/DL           |
|         |                   |                   |                   | LDL               | 116             | MG/DL          | 116              | MG/DL           |
|         |                   |                   |                   | TOTAL CHOLESTEROL | 172             | MG/DL          | 172              | MG/DL           |
|         |                   |                   |                   | TRIGLYCERIDES     | 77              | MG/DL          | 77               | MG/DL           |
|         | 102               | Day 0<br>Pre-dose | 15DEC2009         | HDL               | 29              | MG/DL          | 29               | MG/DL           |
|         |                   |                   |                   | TOTAL CHOLESTEROL | 150             | MG/DL          | 150              | MG/DL           |
|         |                   |                   |                   | TRIGLYCERIDES     | 110             | MG/DL          | 110              | MG/DL           |
|         |                   |                   |                   |                   |                 |                |                  |                 |
|         | Day 3             | 18DEC2009         | HDL               | 32                | MG/DL           | 32             | MG/DL            |                 |
|         |                   |                   | TOTAL CHOLESTEROL | 155               | MG/DL           | 155            | MG/DL            |                 |
|         |                   |                   | TRIGLYCERIDES     | 118               | MG/DL           | 118            | MG/DL            |                 |
|         |                   |                   |                   |                   |                 |                |                  |                 |
| 103     | Day 0<br>Pre-dose | 12JAN2010         | HDL               | 38                | MG/DL           | 38             | MG/DL            |                 |
|         |                   |                   | TOTAL CHOLESTEROL | 210               | MG/DL           | 210            | MG/DL            |                 |
|         |                   |                   | TRIGLYCERIDES     | 92                | MG/DL           | 92             | MG/DL            |                 |
|         |                   |                   |                   |                   |                 |                |                  |                 |
|         | Day 3             | 15JAN2010         | HDL               | 37                | MG/DL           | 37             | MG/DL            |                 |
|         |                   |                   | TOTAL CHOLESTEROL | 203               | MG/DL           | 203            | MG/DL            |                 |
|         |                   |                   | TRIGLYCERIDES     | 101               | MG/DL           | 101            | MG/DL            |                 |
|         |                   |                   |                   |                   |                 |                |                  |                 |
| XVO_003 | 201               | Day 0<br>Pre-dose | 17NOV2009         | HDL               | 74              | MG/DL          | 74               | MG/DL           |
|         |                   |                   |                   | LDL               | 117             | MG/DL          | 117              | MG/DL           |
|         |                   |                   |                   | TOTAL CHOLESTEROL | 203             | MG/DL          | 203              | MG/DL           |

Listing 10.4  
Laboratory Data: Lipids

| Center            | Patient   | Visit             | Assessment Date   | Parameter         | Recorded Result | Recorded Units | Converted Result | Converted Units |    |       |
|-------------------|-----------|-------------------|-------------------|-------------------|-----------------|----------------|------------------|-----------------|----|-------|
| XVO_003           | 201       | Day 0<br>Pre-dose | 17NOV2009         | TRIGLYCERIDES     | 59              | MG/DL          | 59               | MG/DL           |    |       |
|                   |           | Day 3             | 20NOV2009         | HDL               | 75              | MG/DL          | 75               | MG/DL           |    |       |
|                   |           |                   |                   | LDL               | 113             | MG/DL          | 113              | MG/DL           |    |       |
|                   |           |                   |                   | TOTAL CHOLESTEROL | 199             | MG/DL          | 199              | MG/DL           |    |       |
| TRIGLYCERIDES     | 53        | MG/DL             | 53                | MG/DL             |                 |                |                  |                 |    |       |
| XVO_005           | 301       | Day 0<br>Pre-dose | 04AUG2009         | HDL               | 34              | MG/DL          | 34               | MG/DL           |    |       |
|                   |           |                   |                   | LDL               | 76              | MG/DL          | 76               | MG/DL           |    |       |
|                   |           |                   |                   | TOTAL CHOLESTEROL | 135             | MG/DL          | 135              | MG/DL           |    |       |
|                   |           |                   |                   | TRIGLYCERIDES     | 126             | MG/DL          | 126              | MG/DL           |    |       |
|                   | Day 3     | 07AUG2009         | HDL               | 36                | MG/DL           | 36             | MG/DL            |                 |    |       |
|                   |           |                   | LDL               | 91                | MG/DL           | 91             | MG/DL            |                 |    |       |
|                   |           |                   | TOTAL CHOLESTEROL | 157               | MG/DL           | 157            | MG/DL            |                 |    |       |
|                   |           |                   | TRIGLYCERIDES     | 151               | MG/DL           | 151            | MG/DL            |                 |    |       |
|                   |           |                   | 302               | Day 0<br>Pre-dose | 15DEC2009       | HDL            | 25               | MG/DL           | 25 | MG/DL |
|                   |           |                   |                   |                   |                 | LDL            | 81               | MG/DL           | 81 | MG/DL |
| TOTAL CHOLESTEROL | 135       | MG/DL             | 135               | MG/DL             |                 |                |                  |                 |    |       |
| TRIGLYCERIDES     | 143       | MG/DL             | 143               | MG/DL             |                 |                |                  |                 |    |       |
| Day 3             | 18DEC2009 | HDL               | 25                | MG/DL             | 25              | MG/DL          |                  |                 |    |       |
|                   |           | LDL               | 72                | MG/DL             | 72              | MG/DL          |                  |                 |    |       |
|                   |           | TOTAL CHOLESTEROL | 130               | MG/DL             | 130             | MG/DL          |                  |                 |    |       |
|                   |           | TRIGLYCERIDES     | 162               | MG/DL             | 162             | MG/DL          |                  |                 |    |       |
| XVO_007           | 401       | Day 0<br>Pre-dose | 10NOV2009         | HDL               | 40              | MG/DL          | 40               | MG/DL           |    |       |
|                   |           |                   |                   | LDL               | 147             | MG/DL          | 147              | MG/DL           |    |       |



Listing 10.4  
 Laboratory Data: Lipids

| Center            | Patient           | Visit             | Assessment Date | Parameter         | Recorded Result | Recorded Units | Converted Result | Converted Units |
|-------------------|-------------------|-------------------|-----------------|-------------------|-----------------|----------------|------------------|-----------------|
| XVO_007           | 401               | Day 0<br>Pre-dose | 10NOV2009       | TOTAL CHOLESTEROL | 214             | MG/DL          | 214              | MG/DL           |
|                   |                   |                   |                 | TRIGLYCERIDES     | 136             | MG/DL          | 136              | MG/DL           |
|                   |                   | Day 3             | 13NOV2009       | HDL               | 39              | MG/DL          | 39               | MG/DL           |
|                   |                   |                   |                 | LDL               | 144             | MG/DL          | 144              | MG/DL           |
|                   | TOTAL CHOLESTEROL |                   |                 | 202               | MG/DL           | 202            | MG/DL            |                 |
|                   | TRIGLYCERIDES     |                   |                 | 93                | MG/DL           | 93             | MG/DL            |                 |
|                   | 402               | Day 0<br>Pre-dose | 08DEC2009       | HDL               | 66              | MG/DL          | 66               | MG/DL           |
|                   |                   |                   |                 | LDL               | 122             | MG/DL          | 122              | MG/DL           |
|                   |                   |                   |                 | TOTAL CHOLESTEROL | 208             | MG/DL          | 208              | MG/DL           |
|                   |                   |                   |                 | TRIGLYCERIDES     | 102             | MG/DL          | 102              | MG/DL           |
|                   |                   | Day 3             | 11DEC2009       | HDL               | 63              | MG/DL          | 63               | MG/DL           |
|                   |                   |                   |                 | LDL               | 119             | MG/DL          | 119              | MG/DL           |
| TOTAL CHOLESTEROL |                   |                   |                 | 201               | MG/DL           | 201            | MG/DL            |                 |
| TRIGLYCERIDES     |                   |                   |                 | 96                | MG/DL           | 96             | MG/DL            |                 |

Listing 11  
Concomitant Medications

| Center  | Patient | Preferred Term /<br>Investigator Text   | Dose/Unit                                     | Route [a] | Start Date | Stop Date  | AE No [b]  | Indication           |
|---------|---------|-----------------------------------------|-----------------------------------------------|-----------|------------|------------|------------|----------------------|
| XVO_001 | 101     | ENALAPRIL MALEATE/<br>ENALAPRIL MALEATE | 5MG                                           | 1         | PRE-STUDY  | CONTINUING |            | HYPERTENSION         |
|         |         | CALCIUM/<br>CALCIUM                     | 600MG                                         | 1         | PRE-STUDY  | CONTINUING |            | GENERAL HEALTH       |
|         |         | MULTIVITAMINS/<br>MULTIVITAMINS         | 1 DOSE TABLET                                 | 1         | PRE-STUDY  |            |            | GENERAL HEALTH       |
|         |         | ACETYLSALICYLIC ACID/<br>ASPIRIN        | 1TABLET                                       | 1         | 01JAN2005  | CONTINUING |            | GENERAL HEALTH       |
|         |         | INFLUENZA VACCINE/<br>FLUZONE           | .50ML                                         | 3         | 30OCT2009  | 30OCT2009  |            | VACCINATION          |
|         |         | POTASSIUM IODIDE/<br>IOSAT              | 130MG                                         | 1         | 09NOV2009  | 24NOV2009  |            | THYROID BLOCKADE     |
|         |         | 102                                     | HYDROCORTISONE/<br>HYDROCORTISONE             | 1%        | 8          | PRE-STUDY  | CONTINUING |                      |
|         |         | LEVOTHYROXINE SODIUM/<br>LEVOXYL        | UNK                                           | 1         | 01JAN2000  | CONTINUING |            | HYPOTHYROIDISM       |
|         |         | LISINOPRIL/<br>LISINOPRIL               | UNK                                           | 1         | 01JAN2004  | CONTINUING |            | HYPERTENSION         |
|         |         | LOVASTATIN/<br>LOVASTATIN               | UNK                                           | 1         | 01DEC2008  | CONTINUING |            | HYPERCHOLESTEROLEMIA |
|         |         | POTASSIUM IODIDE/<br>IOSAT              | 130MG                                         | 1         | 14DEC2009  | 29DEC2009  |            | THYROID BLOCKADE     |
|         |         | DOCUSATE SODIUM/<br>COLACE              | UNK                                           | 1         | 01JAN2010  | CONTINUING | 2          | CONSTIPATION         |
|         |         | 103                                     | METOPROLOL SUCCINATE/<br>METOPROLOL SUCCINATE | 25/MG     | 1          | 01JAN2005  | CONTINUING |                      |
|         |         | LORAZEPAM/<br>ATIVAN                    | 1MG                                           | 1         | 13NOV2007  | CONTINUING |            | SLEEP AID            |

-- =Date unknown or partially unknown

UNK =Unknown

Note: [a] Route: 1=Oral 2=IV 3=IM 4=Subcutaneous 5=Rectal 6=Transdermal 7=Inhalation 8=Topical 9=Ophthalmic 99=Other

[b] Indicates the AE number if this treatment is being used to treat a recorded AE

Listing 11  
Concomitant Medications

| Center                                | Patient  | Preferred Term /<br>Investigator Text | Dose/Unit | Route [a]                                                 | Start Date | Stop Date  | AE No [b] | Indication                      |
|---------------------------------------|----------|---------------------------------------|-----------|-----------------------------------------------------------|------------|------------|-----------|---------------------------------|
| XVO_001                               | 103      | ACETYLSALICYLIC ACID/<br>ASPIRIN      | 81MG      | 1                                                         | 01JAN2009  | CONTINUING |           | GENERAL HEALTH                  |
|                                       |          | VITAMIN E /01552201//<br>VITAMIN E    | UNK       | 1                                                         | 01JAN2009  | CONTINUING |           | GENERAL HEALTH                  |
|                                       |          | COLECALCIFEROL/<br>VITAMIN D          | UNK       | 1                                                         | 01JAN2009  | CONTINUING |           | GENERAL HEALTH                  |
|                                       |          | RANIBIZUMAB/<br>LUCENTIS SOLUTION     | UNK       | 9                                                         | 01JAN2009  | CONTINUING |           | MACULAR DEGENERATION            |
|                                       |          | ESCITALOPRAM OXALATE/<br>LEXAPRO      | 20MG      | 1                                                         | 01JAN2009  | CONTINUING |           | MOOD LIFTER                     |
|                                       |          | POTASSIUM IODIDE/<br>IOSAT            | 130/MG    | 1                                                         | 11JAN2010  | 26JAN2010  |           | THYROID BLOCKADE                |
|                                       |          | XVO_003                               | 201       | CALCIUM WITH VITAMIN D /01233101//<br>CALCIUM + VITAMIN D | 1000MG     | 1          | PRE-STUDY | CONTINUING                      |
| DUTASTERIDE/<br>AVODART (DUTASTERIDE) | 0.5MG    |                                       |           | 1                                                         | PRE-STUDY  | CONTINUING |           | BENIGN PROSTATIC<br>HYPERTROPHY |
| ALFUZOSIN HYDROCHLORIDE/<br>UROXATRAL | 10MG     |                                       |           | 1                                                         | PRE-STUDY  | CONTINUING |           | BENIGN PROSTATIC<br>HYPERTROPHY |
| MULTIVITAMINS/<br>MULTIVITAMINS       | 1TAB     |                                       |           | 1                                                         | PRE-STUDY  | CONTINUING |           | SUPPLEMENT                      |
| POTASSIUM IODIDE/<br>SSKI             | 12 DROPS |                                       |           | 1                                                         | 16NOV2009  | 02DEC2009  |           | THYROID BLOCKADE                |
| LOMOTIL /00034001//<br>LOMOTIL        | 2.5MG    |                                       |           | 1                                                         | 17NOV2009  | 17NOV2009  | 2         | INTERMITTENT<br>DIARRHEA        |
| LOMOTIL /00034001//<br>LOMOTIL        | 2.5MG    |                                       |           | 1                                                         | 21NOV2009  | 24NOV2009  | 2         | INTERMITTENT<br>DIARRHEA        |
| IBUPROFEN/<br>IBUPROFEN               | 200MG    |                                       |           | 1                                                         | 24NOV2009  | 28NOV2009  | 3         | BACKACHE                        |

-- =Date unknown or partially unknown

UNK =Unknown

Note: [a] Route: 1=Oral 2=IV 3=IM 4=Subcutaneous 5=Rectal 6=Transdermal 7=Inhalation 8=Topical 9=Ophthalmic 99=Other

[b] Indicates the AE number if this treatment is being used to treat a recorded AE

Listing 11  
Concomitant Medications

| Center                         | Patient | Preferred Term / Investigator Text | Dose/Unit | Route [a] | Start Date | Stop Date          | AE No [b] | Indication           |
|--------------------------------|---------|------------------------------------|-----------|-----------|------------|--------------------|-----------|----------------------|
| XVO_003                        | 201     | BACITRACIN/                        | UK        | 8         | 21NOV2009  | 02DEC2009          | 5         | LEFT ELBOW SORE      |
|                                |         | BACITRACIN                         |           |           |            |                    |           |                      |
|                                |         | DIPHENHYDRAMINE/                   | 25MG      | 1         | 23NOV2009  | 24NOV2009          | 7         | NASAL CONGESTION     |
|                                |         | DIPHENHYDRAMINE                    |           |           |            |                    |           |                      |
|                                |         | PSEUDOEPHEDRINE/                   | 125MG     | 1         | 23NOV2009  | 24NOV2009          | 7         | NASAL CONGESTION     |
|                                |         | PSEUDOEPHEDRINE                    |           |           |            |                    |           |                      |
| XVO_005                        | 301     | LISINOPRIL/                        | 10MG      | 1         | PRE-STUDY  | CONTINUING         |           | HIGH BLOOD PRESSURE  |
|                                |         | LISINOPRIL                         |           |           |            |                    |           |                      |
|                                |         | METFORMIN/                         | 500MG     | 1         | PRE-STUDY  | CONTINUING         |           | DIABETES             |
|                                |         | METFORMIN                          |           |           |            |                    |           |                      |
|                                |         | OMEPRAZOLE/                        | 20MG      | 1         | -----2007  | CONTINUING         |           | GASTROESOPHAGEAL     |
|                                |         | PRILOSEC                           |           |           |            |                    |           | REFLUX               |
|                                |         | SIMVASTATIN/                       | 40MG      | 1         | -----2009  | CONTINUING         |           | HIGH CHOLESTEROL     |
|                                |         | SIMVASTIN                          |           |           |            |                    |           |                      |
|                                |         | VICODIN/                           | 7.5/750MG | 1         | -----2007  | CONTINUING         |           | SCIATICA PAIN        |
|                                |         | VICODIN PRN                        |           |           |            |                    |           |                      |
|                                |         | CLONALIN/                          | 25MG      | 1         | -----2005  | CONTINUING         |           | HIVES                |
|                                |         | BENADRYL                           |           |           |            |                    |           |                      |
|                                |         | ENOXAPARIN SODIUM/                 | 80MG      | 4         | 15FEB2007  | CONTINUING         |           | PROPHYLAXIS OF DEEP  |
|                                |         | LOVENOX                            |           |           |            |                    |           | VEIN THROMBOSIS      |
| CLONALIN/                      | 50MG    | 1                                  | 03AUG2009 | 07AUG2009 |            | NASAL DRAINAGE     |           |                      |
| BENADRYL                       |         |                                    |           |           |            |                    |           |                      |
| POTASSIUM IODIDE/              | 300MG   | 1                                  | 03AUG2009 | 18AUG2009 |            | THYROID PROTECTION |           |                      |
| SATURATED SOLUTION POTASSIUM   |         |                                    |           |           |            |                    |           |                      |
| IODIDE (SSKI)                  |         |                                    |           |           |            |                    |           |                      |
| DEXTROMETHORPHAN HYDROBROMIDE/ | 30MG    | 1                                  | 06AUG2009 | 08SEP2009 |            | COUGH              |           |                      |
| DEXTROMETHORPHAN HBR           |         |                                    |           |           |            |                    |           |                      |
|                                | 302     | FISH OIL/                          | 1000MG    | 1         | PRE-STUDY  | CONTINUING         |           | HYPERCHOLESTEROLEMIA |
|                                |         | FISH OIL                           |           |           |            |                    |           |                      |

-- =Date unknown or partially unknown

UNK =Unknown

Note: [a] Route: 1=Oral 2=IV 3=IM 4=Subcutaneous 5=Rectal 6=Transdermal 7=Inhalation 8=Topical 9=Ophthalmic 99=Other

[b] Indicates the AE number if this treatment is being used to treat a recorded AE

Listing 11  
 Concomitant Medications

| Center  | Patient | Preferred Term /<br>Investigator Text                    | Dose/Unit | Route [a] | Start Date | Stop Date  | AE No [b] | Indication           |
|---------|---------|----------------------------------------------------------|-----------|-----------|------------|------------|-----------|----------------------|
| XVO_005 | 302     | DOCUSATE SODIUM/<br>EQUATE STOOL SOFTNER                 | 100MG     | 1         | PRE-STUDY  | CONTINUING |           | PROPHYLAXIS          |
|         |         | COTYLENOL/<br>TYLENOL                                    | 500MG     | 1         | PRE-STUDY  | CONTINUING |           | BACK PAIN            |
|         |         | CENTRUM SILVER /06027401//<br>CENTRUM SILVER             | UNK       | 1         | 22SEP2008  | CONTINUING |           | PROPHYLAXIS          |
|         |         | CALCIUM/<br>CALCIUM                                      | 600MG     | 1         | 04FEB2009  | CONTINUING |           | PROPHYLAXIS          |
|         |         | TAMSULOSIN HYDROCHLORIDE/<br>FLOMAX                      | 0.4MG     | 1         | 04FEB2009  | CONTINUING |           | URINARY OBSTRUCTION  |
|         |         | SIMVASTATIN/<br>SIMVASTIN                                | 10MG      | 1         | 04FEB2009  | CONTINUING |           | HYPERCHOLESTEROLEMIA |
|         |         | ACETYLSALICYLIC ACID/<br>ASPIRIN                         | 81MG      | 1         | 04FEB2009  | CONTINUING |           | PROPHYLAXIS          |
|         |         | RANITIDINE/<br>RANITIDINE                                | 150MG     | 1         | 16FEB2009  | CONTINUING |           | PROPHYLAXIS          |
|         |         | POTASSIUM IODIDE/<br>SATURATED SOLUTION POTASSIUM IODIDE | 300MG     | 1         | 14DEC2009  | 29DEC2009  |           | THYROID PROTECTION   |
|         |         | ZOLEDRONIC ACID/<br>ZOMETA                               | 4MG       | 2         | 15JAN2010  | CONTINUING |           | BONE METASTASIS      |
| XVO_007 | 401     | POTASSIUM IODIDE/<br>IOSAT                               | 130MG     | 1         | 09NOV2009  | 24NOV2009  |           | THYROID PROTECTION   |
|         |         | CLONALIN/<br>BENADRYL                                    | 50MG      | 1         | 10NOV2009  | 10NOV2009  |           | PREMED               |
|         |         | PREDNISONE/<br>PREDNISONE                                | 50MG      | 1         | 10NOV2009  | 10NOV2009  |           | PREMED               |
|         | 402     | GABAPENTIN/<br>GABAPENTIN                                | 400MG     | 1         | --JAN2009  | CONTINUING |           | PAIN                 |

-- =Date unknown or partially unknown

UNK =Unknown

Note: [a] Route: 1=Oral 2=IV 3=IM 4=Subcutaneous 5=Rectal 6=Transdermal 7=Inhalation 8=Topical 9=Ophthalmic 99=Other

[b] Indicates the AE number if this treatment is being used to treat a recorded AE

Listing 11  
Concomitant Medications

| Center  | Patient | Preferred Term /<br>Investigator Text | Dose/Unit | Route [a] | Start Date | Stop Date  | AE No [b] | Indication                |
|---------|---------|---------------------------------------|-----------|-----------|------------|------------|-----------|---------------------------|
| XVO_007 | 402     | OXYCOCET/<br>PERCOCET                 | 10/325MG  | 1         | --JAN2009  | CONTINUING |           | PAIN                      |
|         |         | DOCUSATE SODIUM/<br>SENAKOT           | 1TAB      | 1         | 05NOV2009  | CONTINUING |           | STOOL SOFTENER            |
|         |         | MORPHINE SULFATE/<br>MORPHINE SULFATE | 30MG      | 1         | 05NOV2009  | CONTINUING |           | PAIN                      |
|         |         | POTASSIUM IODIDE/<br>IOSAT            | 130MG     | 1         | 07DEC2009  | 22DEC2009  |           | THYROID PROTECTION        |
|         |         | CEFALEXIN/<br>KEFLEX                  | 500MG     | 1         | 19JAN2010  | 02FEB2010  | 3         | SUPERFICIAL<br>CELLULITIS |

-- =Date unknown or partially unknown

UNK =Unknown

Note: [a] Route: 1=Oral 2=IV 3=IM 4=Subcutaneous 5=Rectal 6=Transdermal 7=Inhalation 8=Topical 9=Ophthalmic 99=Other

[b] Indicates the AE number if this treatment is being used to treat a recorded AE

Listing 12  
Vital Signs

| Center                          | Patient | Visit            | Assessment Date | Parameter                       | Recorded Result | Recorded Units | Converted Result | Converted Units |
|---------------------------------|---------|------------------|-----------------|---------------------------------|-----------------|----------------|------------------|-----------------|
| XVO_001                         | 101     | Screening        | 09NOV2009       | Supine Systolic Blood Pressure  | 130             | mmHg           | 130.0            | mmHg            |
|                                 |         |                  |                 | Supine Diastolic Blood Pressure | 78              | mmHg           | 78.0             | mmHg            |
|                                 |         |                  |                 | Pulse Rate                      | 79              | bpm            | 79.0             | bpm             |
|                                 |         |                  |                 | Temperature                     | 36.5            | oC             | 36.5             | oC              |
|                                 |         |                  |                 | Respiration Rate                | 17              | bpm            | 17.0             | bpm             |
|                                 |         |                  |                 | Body Weight                     | 80.8            | kg             | 80.8             | kg              |
|                                 |         |                  |                 | Height                          | 165.7           | cm             | 165.7            | cm              |
|                                 |         | Day 0 Pre-dose   | 10NOV2009       | Supine Systolic Blood Pressure  | 112             | mmHg           | 112.0            | mmHg            |
|                                 |         |                  |                 | Supine Diastolic Blood Pressure | 60              | mmHg           | 60.0             | mmHg            |
|                                 |         |                  |                 | Pulse Rate                      | 70              | bpm            | 70.0             | bpm             |
|                                 |         |                  |                 | Temperature                     | 36.6            | oC             | 36.6             | oC              |
|                                 |         |                  |                 | Respiration Rate                | 20              | bpm            | 20.0             | bpm             |
|                                 |         | 5 Minutes        | 10NOV2009       | SaO2                            | 95              | %              | 95.0             | %               |
|                                 |         |                  |                 | Supine Systolic Blood Pressure  | 116             | mmHg           | 116.0            | mmHg            |
|                                 |         |                  |                 | Supine Diastolic Blood Pressure | 60              | mmHg           | 60.0             | mmHg            |
|                                 |         |                  |                 | Pulse Rate                      | 76              | bpm            | 76.0             | bpm             |
|                                 |         |                  |                 | Temperature                     | 36.7            | oC             | 36.7             | oC              |
|                                 |         | 15 Minutes       | 10NOV2009       | Respiration Rate                | 20              | bpm            | 20.0             | bpm             |
|                                 |         |                  |                 | SaO2                            | 97              | %              | 97.0             | %               |
|                                 |         |                  |                 | Supine Systolic Blood Pressure  | 116             | mmHg           | 116.0            | mmHg            |
| Supine Diastolic Blood Pressure | 60      |                  |                 | mmHg                            | 60.0            | mmHg           |                  |                 |
| Pulse Rate                      | 81      |                  |                 | bpm                             | 81.0            | bpm            |                  |                 |
|                                 |         | Temperature      | 36.1            | oC                              | 36.1            | oC             |                  |                 |
|                                 |         | Respiration Rate | 20              | bpm                             | 20.0            | bpm            |                  |                 |
|                                 |         | SaO2             | 96              | %                               | 96.0            | %              |                  |                 |

Listing 12  
 Vital Signs

| Center           | Patient   | Visit                           | Assessment Date | Parameter                       | Recorded Result | Recorded Units                 | Converted Result | Converted Units |
|------------------|-----------|---------------------------------|-----------------|---------------------------------|-----------------|--------------------------------|------------------|-----------------|
| XVO_001          | 101       | 60 Minutes                      | 10NOV2009       | Supine Systolic Blood Pressure  | 120             | mmHg                           | 120.0            | mmHg            |
|                  |           |                                 |                 | Supine Diastolic Blood Pressure | 68              | mmHg                           | 68.0             | mmHg            |
|                  |           |                                 |                 | Pulse Rate                      | 74              | bpm                            | 74.0             | bpm             |
|                  |           |                                 |                 | Temperature                     | 36.8            | oC                             | 36.8             | oC              |
|                  |           |                                 |                 | Respiration Rate                | 20              | bpm                            | 20.0             | bpm             |
|                  |           |                                 |                 | SaO2                            | 97              | %                              | 97.0             | %               |
|                  |           | 4 - 6 Hours                     | 10NOV2009       | Supine Systolic Blood Pressure  | 114             | mmHg                           | 114.0            | mmHg            |
|                  |           |                                 |                 | Supine Diastolic Blood Pressure | 56              | mmHg                           | 56.0             | mmHg            |
|                  |           |                                 |                 | Pulse Rate                      | 80              | bpm                            | 80.0             | bpm             |
|                  |           |                                 |                 | Respiration Rate                | 20              | bpm                            | 20.0             | bpm             |
|                  |           |                                 |                 | SaO2                            | 96              | %                              | 96.0             | %               |
|                  |           |                                 |                 | Day 2                           | 12NOV2009       | Supine Systolic Blood Pressure | 122              | mmHg            |
|                  |           | Supine Diastolic Blood Pressure | 71              |                                 |                 | mmHg                           | 71.0             | mmHg            |
|                  |           | Pulse Rate                      | 70              |                                 |                 | bpm                            | 70.0             | bpm             |
|                  |           | Temperature                     | 35.8            |                                 |                 | oC                             | 35.8             | oC              |
|                  |           | Respiration Rate                | 12              |                                 |                 | bpm                            | 12.0             | bpm             |
|                  |           | SaO2                            | 95              |                                 |                 | %                              | 95.0             | %               |
|                  |           | Day 3                           | 13NOV2009       | Supine Systolic Blood Pressure  | 101             | mmHg                           | 101.0            | mmHg            |
|                  |           |                                 |                 | Supine Diastolic Blood Pressure | 55              | mmHg                           | 55.0             | mmHg            |
|                  |           |                                 |                 | Pulse Rate                      | 71              | bpm                            | 71.0             | bpm             |
| Temperature      | 35.9      |                                 |                 | oC                              | 35.9            | oC                             |                  |                 |
| Respiration Rate | 17        |                                 |                 | bpm                             | 17.0            | bpm                            |                  |                 |
| Day 6            | 16NOV2009 |                                 |                 | Supine Systolic Blood Pressure  | 124             | mmHg                           | 124.0            | mmHg            |
|                  |           | Supine Diastolic Blood Pressure | 66              | mmHg                            | 66.0            | mmHg                           |                  |                 |
|                  |           | Pulse Rate                      | 79              | bpm                             | 79.0            | bpm                            |                  |                 |



Listing 12  
Vital Signs

| Center                          | Patient     | Visit     | Assessment Date                 | Parameter                       | Recorded Result | Recorded Units | Converted Result | Converted Units |
|---------------------------------|-------------|-----------|---------------------------------|---------------------------------|-----------------|----------------|------------------|-----------------|
| XVO_001                         | 101         | Day 6     | 16NOV2009                       | Temperature                     | 36.8            | oC             | 36.8             | oC              |
|                                 |             |           |                                 | Respiration Rate                | 17              | bpm            | 17.0             | bpm             |
|                                 |             |           |                                 | SaO2                            | 97              | %              | 97.0             | %               |
|                                 |             | Day 14    | 24NOV2009                       | Supine Systolic Blood Pressure  | 140             | mmHg           | 140.0            | mmHg            |
|                                 |             |           |                                 | Supine Diastolic Blood Pressure | 64              | mmHg           | 64.0             | mmHg            |
|                                 |             |           |                                 | Pulse Rate                      | 67              | bpm            | 67.0             | bpm             |
|                                 |             |           |                                 | Temperature                     | 35.7            | oC             | 35.7             | oC              |
|                                 |             |           |                                 | Respiration Rate                | 17              | bpm            | 17.0             | bpm             |
|                                 |             |           |                                 | SaO2                            | 99              | %              | 99.0             | %               |
|                                 | Body Weight |           |                                 | 81.3                            | kg              | 81.3           | kg               |                 |
|                                 | Day 30      | 11DEC2009 | Supine Systolic Blood Pressure  | 148                             | mmHg            | 148.0          | mmHg             |                 |
|                                 |             |           | Supine Diastolic Blood Pressure | 71                              | mmHg            | 71.0           | mmHg             |                 |
|                                 |             |           | Pulse Rate                      | 81                              | bpm             | 81.0           | bpm              |                 |
|                                 |             |           | Temperature                     | 35.6                            | oC              | 35.6           | oC               |                 |
|                                 | Day 42      | 05JAN2010 | Respiration Rate                | 17                              | bpm             | 17.0           | bpm              |                 |
|                                 |             |           | Supine Systolic Blood Pressure  | 124                             | mmHg            | 124.0          | mmHg             |                 |
|                                 |             |           | Supine Diastolic Blood Pressure | 70                              | mmHg            | 70.0           | mmHg             |                 |
|                                 |             |           | Pulse Rate                      | 87                              | bpm             | 87.0           | bpm              |                 |
|                                 |             |           | Temperature                     | 36.6                            | oC              | 36.6           | oC               |                 |
|                                 | 102         | Screening | 11DEC2009                       | Respiration Rate                | 17              | bpm            | 17.0             | bpm             |
| Supine Systolic Blood Pressure  |             |           |                                 | 143                             | mmHg            | 143.0          | mmHg             |                 |
| Supine Diastolic Blood Pressure |             |           |                                 | 84                              | mmHg            | 84.0           | mmHg             |                 |
| Pulse Rate                      |             |           |                                 | 107                             | bpm             | 107.0          | bpm              |                 |
| Screening                       |             | 11DEC2009 | Temperature                     | 36.6                            | oC              | 36.6           | oC               |                 |
|                                 |             |           | Respiration Rate                | 18                              | bpm             | 18.0           | bpm              |                 |
|                                 |             |           | Supine Systolic Blood Pressure  | 143                             | mmHg            | 143.0          | mmHg             |                 |
|                                 |             |           | Supine Diastolic Blood Pressure | 84                              | mmHg            | 84.0           | mmHg             |                 |
|                                 |             |           | Pulse Rate                      | 107                             | bpm             | 107.0          | bpm              |                 |

Listing 12  
Vital Signs

| Center     | Patient   | Visit          | Assessment Date                 | Parameter   | Recorded Result                 | Recorded Units | Converted Result | Converted Units |      |
|------------|-----------|----------------|---------------------------------|-------------|---------------------------------|----------------|------------------|-----------------|------|
| XVO_001    | 102       | Screening      | 11DEC2009                       | SaO2        | 98                              | %              | 98.0             | %               |      |
|            |           |                |                                 | Body Weight | 143.7                           | kg             | 143.7            | kg              |      |
|            |           |                |                                 | Height      | 172.2                           | cm             | 172.2            | cm              |      |
|            |           | Day 0 Pre-dose | 15DEC2009                       |             | Supine Systolic Blood Pressure  | 125            | mmHg             | 125.0           | mmHg |
|            |           |                |                                 |             | Supine Diastolic Blood Pressure | 73             | mmHg             | 73.0            | mmHg |
|            |           |                |                                 |             | Pulse Rate                      | 101            | bpm              | 101.0           | bpm  |
|            |           |                |                                 |             | Temperature                     | 36.3           | oC               | 36.3            | oC   |
|            |           |                |                                 |             | Respiration Rate                | 14             | bpm              | 14.0            | bpm  |
|            |           |                |                                 |             | SaO2                            | 96             | %                | 96.0            | %    |
|            |           | 5 Minutes      | 15DEC2009                       |             | Supine Systolic Blood Pressure  | 120            | mmHg             | 120.0           | mmHg |
|            |           |                |                                 |             | Supine Diastolic Blood Pressure | 71             | mmHg             | 71.0            | mmHg |
|            |           |                |                                 |             | Pulse Rate                      | 91             | bpm              | 91.0            | bpm  |
|            |           |                |                                 |             | Temperature                     | 36.6           | oC               | 36.6            | oC   |
|            |           |                |                                 |             | Respiration Rate                | 16             | bpm              | 16.0            | bpm  |
|            |           |                |                                 |             | SaO2                            | 95             | %                | 95.0            | %    |
|            |           | 15 Minutes     | 15DEC2009                       |             | Supine Systolic Blood Pressure  | 138            | mmHg             | 138.0           | mmHg |
|            |           |                |                                 |             | Supine Diastolic Blood Pressure | 88             | mmHg             | 88.0            | mmHg |
|            |           |                |                                 |             | Pulse Rate                      | 101            | bpm              | 101.0           | bpm  |
|            |           |                |                                 |             | Temperature                     | 36.7           | oC               | 36.7            | oC   |
|            |           |                |                                 |             | Respiration Rate                | 16             | bpm              | 16.0            | bpm  |
| SaO2       | 93        |                |                                 |             | %                               | 93.0           | %                |                 |      |
| 30 Minutes | 15DEC2009 |                | Supine Systolic Blood Pressure  | 130         | mmHg                            | 130.0          | mmHg             |                 |      |
|            |           |                | Supine Diastolic Blood Pressure | 79          | mmHg                            | 79.0           | mmHg             |                 |      |
|            |           |                | Pulse Rate                      | 102         | bpm                             | 102.0          | bpm              |                 |      |
|            |           |                | Temperature                     | 36.3        | oC                              | 36.3           | oC               |                 |      |

Listing 12  
Vital Signs

| Center  | Patient   | Visit                           | Assessment Date | Parameter                       | Recorded Result | Recorded Units | Converted Result | Converted Units |
|---------|-----------|---------------------------------|-----------------|---------------------------------|-----------------|----------------|------------------|-----------------|
| XVO_001 | 102       | 30 Minutes                      | 15DEC2009       | Respiration Rate                | 15              | bpm            | 15.0             | bpm             |
|         |           |                                 |                 | SaO2                            | 93              | %              | 93.0             | %               |
|         |           | 60 Minutes                      | 15DEC2009       | Supine Systolic Blood Pressure  | 125             | mmHg           | 125.0            | mmHg            |
|         |           |                                 |                 | Supine Diastolic Blood Pressure | 80              | mmHg           | 80.0             | mmHg            |
|         |           |                                 |                 | Pulse Rate                      | 96              | bpm            | 96.0             | bpm             |
|         |           |                                 |                 | Temperature                     | 36.4            | oC             | 36.4             | oC              |
|         |           |                                 |                 | Respiration Rate                | 16              | bpm            | 16.0             | bpm             |
|         |           |                                 |                 | SaO2                            | 95              | %              | 95.0             | %               |
|         |           | 4 - 6 Hours                     | 15DEC2009       | Supine Systolic Blood Pressure  | 129             | mmHg           | 129.0            | mmHg            |
|         |           |                                 |                 | Supine Diastolic Blood Pressure | 89              | mmHg           | 89.0             | mmHg            |
|         |           |                                 |                 | Pulse Rate                      | 104             | bpm            | 104.0            | bpm             |
|         |           |                                 |                 | Temperature                     | 35.9            | oC             | 35.9             | oC              |
|         |           |                                 |                 | Respiration Rate                | 14              | bpm            | 14.0             | bpm             |
|         |           |                                 |                 | SaO2                            | 97              | %              | 97.0             | %               |
|         |           | Day 1                           | 16DEC2009       | Supine Systolic Blood Pressure  | 128             | mmHg           | 128.0            | mmHg            |
|         |           |                                 |                 | Supine Diastolic Blood Pressure | 84              | mmHg           | 84.0             | mmHg            |
|         |           |                                 |                 | Pulse Rate                      | 96              | bpm            | 96.0             | bpm             |
|         |           |                                 |                 | Temperature                     | 35.9            | oC             | 35.9             | oC              |
|         |           |                                 |                 | Respiration Rate                | 16              | bpm            | 16.0             | bpm             |
|         |           |                                 |                 | SaO2                            | 99              | %              | 99.0             | %               |
| Day 2   | 17DEC2009 | Supine Systolic Blood Pressure  | 128             | mmHg                            | 128.0           | mmHg           |                  |                 |
|         |           | Supine Diastolic Blood Pressure | 70              | mmHg                            | 70.0            | mmHg           |                  |                 |
|         |           | Pulse Rate                      | 116             | bpm                             | 116.0           | bpm            |                  |                 |
|         |           | Temperature                     | 36.1            | oC                              | 36.1            | oC             |                  |                 |
|         |           | Respiration Rate                | 16              | bpm                             | 16.0            | bpm            |                  |                 |

Listing 12  
Vital Signs

| Center  | Patient | Visit  | Assessment Date | Parameter                       | Recorded Result | Recorded Units | Converted Result | Converted Units |
|---------|---------|--------|-----------------|---------------------------------|-----------------|----------------|------------------|-----------------|
| XVO_001 | 102     | Day 2  | 17DEC2009       | SaO2                            | 98              | %              | 98.0             | %               |
|         |         | Day 3  | 18DEC2009       | Supine Systolic Blood Pressure  | 129             | mmHg           | 129.0            | mmHg            |
|         |         |        |                 | Supine Diastolic Blood Pressure | 76              | mmHg           | 76.0             | mmHg            |
|         |         |        |                 | Pulse Rate                      | 89              | bpm            | 89.0             | bpm             |
|         |         |        |                 | Temperature                     | 35.8            | oC             | 35.8             | oC              |
|         |         |        |                 | Respiration Rate                | 17              | bpm            | 17.0             | bpm             |
|         |         |        |                 | SaO2                            | 95              | %              | 95.0             | %               |
|         |         | Day 6  | 21DEC2009       | Supine Systolic Blood Pressure  | 131             | mmHg           | 131.0            | mmHg            |
|         |         |        |                 | Supine Diastolic Blood Pressure | 88              | mmHg           | 88.0             | mmHg            |
|         |         |        |                 | Pulse Rate                      | 94              | bpm            | 94.0             | bpm             |
|         |         |        |                 | Temperature                     | 36.3            | oC             | 36.3             | oC              |
|         |         |        |                 | Respiration Rate                | 17              | bpm            | 17.0             | bpm             |
|         |         |        |                 | SaO2                            | 100             | %              | 100.0            | %               |
|         |         | Day 14 | 29DEC2009       | Supine Systolic Blood Pressure  | 121             | mmHg           | 121.0            | mmHg            |
|         |         |        |                 | Supine Diastolic Blood Pressure | 70              | mmHg           | 70.0             | mmHg            |
|         |         |        |                 | Pulse Rate                      | 94              | bpm            | 94.0             | bpm             |
|         |         |        |                 | Temperature                     | 36.8            | oC             | 36.8             | oC              |
|         |         |        |                 | Respiration Rate                | 18              | bpm            | 18.0             | bpm             |
|         |         |        |                 | SaO2                            | 97              | %              | 97.0             | %               |
|         |         |        |                 | Body Weight                     | 172.2           | kg             | 172.2            | kg              |
|         |         | Day 30 | 15JAN2010       | Supine Systolic Blood Pressure  | 127             | mmHg           | 127.0            | mmHg            |
|         |         |        |                 | Supine Diastolic Blood Pressure | 75              | mmHg           | 75.0             | mmHg            |
|         |         |        |                 | Pulse Rate                      | 87              | bpm            | 87.0             | bpm             |
|         |         |        |                 | Temperature                     | 35.7            | oC             | 35.7             | oC              |
|         |         |        |                 | Respiration Rate                | 16              | bpm            | 16.0             | bpm             |

Listing 12  
Vital Signs

| Center      | Patient                         | Visit          | Assessment Date | Parameter                       | Recorded Result                | Recorded Units | Converted Result | Converted Units |      |
|-------------|---------------------------------|----------------|-----------------|---------------------------------|--------------------------------|----------------|------------------|-----------------|------|
| XVO_001     | 102                             | Day 30         | 15JAN2010       | SaO2                            | 99                             | %              | 99.0             | %               |      |
|             |                                 | Day 42         | 29JAN2010       | Supine Systolic Blood Pressure  | 139                            | mmHg           | 139.0            | mmHg            |      |
|             |                                 |                |                 | Supine Diastolic Blood Pressure | 79                             | mmHg           | 79.0             | mmHg            |      |
|             |                                 |                |                 | Pulse Rate                      | 86                             | bpm            | 86.0             | bpm             |      |
|             |                                 |                |                 | Temperature                     | 35.4                           | oC             | 35.4             | oC              |      |
|             |                                 |                |                 | Respiration Rate                | 17                             | bpm            | 17.0             | bpm             |      |
|             |                                 |                |                 | SaO2                            | 98                             | %              | 98.0             | %               |      |
|             |                                 |                |                 | Body Weight                     | 140                            | kg             | 140.0            | kg              |      |
|             |                                 | 103            | Screening       | 11JAN2010                       | Supine Systolic Blood Pressure | 109            | mmHg             | 109.0           | mmHg |
|             | Supine Diastolic Blood Pressure |                |                 |                                 | 76                             | mmHg           | 76.0             | mmHg            |      |
|             | Pulse Rate                      |                |                 |                                 | 56                             | bpm            | 56.0             | bpm             |      |
|             | Temperature                     |                |                 |                                 | 36.1                           | oC             | 36.1             | oC              |      |
|             | Respiration Rate                |                |                 |                                 | 16                             | bpm            | 16.0             | bpm             |      |
|             | SaO2                            |                |                 |                                 | 97                             | %              | 97.0             | %               |      |
| Body Weight | 86.6                            |                |                 |                                 | kg                             | 86.6           | kg               |                 |      |
|             |                                 |                | Height          | 170                             | cm                             | 170.0          | cm               |                 |      |
|             |                                 | Day 0 Pre-dose | 12JAN2010       | Supine Systolic Blood Pressure  | 110                            | mmHg           | 110.0            | mmHg            |      |
|             |                                 |                |                 | Supine Diastolic Blood Pressure | 75                             | mmHg           | 75.0             | mmHg            |      |
|             |                                 |                |                 | Pulse Rate                      | 59                             | bpm            | 59.0             | bpm             |      |
|             |                                 |                |                 | Temperature                     | 35.7                           | oC             | 35.7             | oC              |      |
|             |                                 |                |                 | Respiration Rate                | 18                             | bpm            | 18.0             | bpm             |      |
|             |                                 |                |                 | SaO2                            | 95                             | %              | 95.0             | %               |      |
|             |                                 |                |                 | Body Weight                     | 87                             | kg             | 87.0             | kg              |      |
|             |                                 | 5 Minutes      | 12JAN2010       | Supine Systolic Blood Pressure  | 126                            | mmHg           | 126.0            | mmHg            |      |
|             |                                 |                |                 | Supine Diastolic Blood Pressure | 82                             | mmHg           | 82.0             | mmHg            |      |

Listing 12  
Vital Signs

| Center           | Patient   | Visit            | Assessment Date | Parameter                       | Recorded Result | Recorded Units                  | Converted Result | Converted Units |       |      |
|------------------|-----------|------------------|-----------------|---------------------------------|-----------------|---------------------------------|------------------|-----------------|-------|------|
| XVO_001          | 103       | 5 Minutes        | 12JAN2010       | Pulse Rate                      | 62              | bpm                             | 62.0             | bpm             |       |      |
|                  |           |                  |                 | Temperature                     | 36.4            | oC                              | 36.4             | oC              |       |      |
|                  |           |                  |                 | Respiration Rate                | 16              | bpm                             | 16.0             | bpm             |       |      |
|                  |           |                  |                 | SaO2                            | 97              | %                               | 97.0             | %               |       |      |
|                  |           | 15 Minutes       | 12JAN2010       | Supine Systolic Blood Pressure  | 122             | mmHg                            | 122.0            | mmHg            |       |      |
|                  |           |                  |                 | Supine Diastolic Blood Pressure | 74              | mmHg                            | 74.0             | mmHg            |       |      |
|                  |           |                  |                 | Pulse Rate                      | 63              | bpm                             | 63.0             | bpm             |       |      |
|                  |           |                  |                 | Temperature                     | 36.3            | oC                              | 36.3             | oC              |       |      |
|                  |           |                  |                 | Respiration Rate                | 15              | bpm                             | 15.0             | bpm             |       |      |
|                  |           |                  |                 | SaO2                            | 99              | %                               | 99.0             | %               |       |      |
|                  |           |                  |                 | 30 Minutes                      | 12JAN2010       | Supine Systolic Blood Pressure  | 117              | mmHg            | 117.0 | mmHg |
|                  |           |                  |                 |                                 |                 | Supine Diastolic Blood Pressure | 81               | mmHg            | 81.0  | mmHg |
|                  |           | Pulse Rate       | 65              |                                 |                 | bpm                             | 65.0             | bpm             |       |      |
|                  |           | Temperature      | 36.3            |                                 |                 | oC                              | 36.3             | oC              |       |      |
|                  |           | Respiration Rate | 16              |                                 |                 | bpm                             | 16.0             | bpm             |       |      |
|                  |           | SaO2             | 97              |                                 |                 | %                               | 97.0             | %               |       |      |
|                  |           | 60 Minutes       | 12JAN2010       |                                 |                 | Supine Systolic Blood Pressure  | 125              | mmHg            | 125.0 | mmHg |
|                  |           |                  |                 |                                 |                 | Supine Diastolic Blood Pressure | 78               | mmHg            | 78.0  | mmHg |
|                  |           |                  |                 | Pulse Rate                      | 52              | bpm                             | 52.0             | bpm             |       |      |
|                  |           |                  |                 | Temperature                     | 36.5            | oC                              | 36.5             | oC              |       |      |
| Respiration Rate | 14        |                  |                 | bpm                             | 14.0            | bpm                             |                  |                 |       |      |
| SaO2             | 97        |                  |                 | %                               | 97.0            | %                               |                  |                 |       |      |
| 4 - 6 Hours      | 12JAN2010 |                  |                 | Supine Systolic Blood Pressure  | 108             | mmHg                            | 108.0            | mmHg            |       |      |
|                  |           |                  |                 | Supine Diastolic Blood Pressure | 69              | mmHg                            | 69.0             | mmHg            |       |      |
|                  |           | Pulse Rate       | 67              | bpm                             | 67.0            | bpm                             |                  |                 |       |      |

Listing 12  
 Vital Signs

| Center                          | Patient | Visit       | Assessment Date | Parameter                       | Recorded Result | Recorded Units | Converted Result | Converted Units |
|---------------------------------|---------|-------------|-----------------|---------------------------------|-----------------|----------------|------------------|-----------------|
| XVO_001                         | 103     | 4 - 6 Hours | 12JAN2010       | Temperature                     | 36.3            | oC             | 36.3             | oC              |
|                                 |         |             |                 | Respiration Rate                | 14              | bpm            | 14.0             | bpm             |
|                                 |         |             |                 | SaO2                            | 97              | %              | 97.0             | %               |
|                                 |         | Day 1       | 13JAN2010       | Supine Systolic Blood Pressure  | 117             | mmHg           | 117.0            | mmHg            |
|                                 |         |             |                 | Supine Diastolic Blood Pressure | 82              | mmHg           | 82.0             | mmHg            |
|                                 |         |             |                 | Pulse Rate                      | 55              | bpm            | 55.0             | bpm             |
|                                 |         |             |                 | Temperature                     | 36.3            | oC             | 36.3             | oC              |
|                                 |         |             |                 | Respiration Rate                | 15              | bpm            | 15.0             | bpm             |
|                                 |         |             |                 | SaO2                            | 96              | %              | 96.0             | %               |
|                                 |         | Day 2       | 14JAN2010       | Supine Systolic Blood Pressure  | 117             | mmHg           | 117.0            | mmHg            |
|                                 |         |             |                 | Supine Diastolic Blood Pressure | 75              | mmHg           | 75.0             | mmHg            |
|                                 |         |             |                 | Pulse Rate                      | 57              | bpm            | 57.0             | bpm             |
|                                 |         |             |                 | Temperature                     | 36.3            | oC             | 36.3             | oC              |
|                                 |         |             |                 | Respiration Rate                | 14              | bpm            | 14.0             | bpm             |
|                                 |         | Day 3       | 15JAN2010       | SaO2                            | 95              | %              | 95.0             | %               |
|                                 |         |             |                 | Supine Systolic Blood Pressure  | 107             | mmHg           | 107.0            | mmHg            |
|                                 |         |             |                 | Supine Diastolic Blood Pressure | 65              | mmHg           | 65.0             | mmHg            |
|                                 |         |             |                 | Pulse Rate                      | 65              | bpm            | 65.0             | bpm             |
|                                 |         |             |                 | Temperature                     | 36.2            | oC             | 36.2             | oC              |
|                                 |         | Day 6       | 19JAN2010       | Respiration Rate                | 16              | bpm            | 16.0             | bpm             |
|                                 |         |             |                 | SaO2                            | 96              | %              | 96.0             | %               |
| Supine Systolic Blood Pressure  | 107     |             |                 | mmHg                            | 107.0           | mmHg           |                  |                 |
| Supine Diastolic Blood Pressure | 64      |             |                 | mmHg                            | 64.0            | mmHg           |                  |                 |
|                                 |         |             |                 |                                 |                 |                |                  |                 |
|                                 |         |             |                 | Pulse Rate                      | 52              | bpm            | 52.0             | bpm             |
|                                 |         |             |                 | Temperature                     | 36.5            | oC             | 36.5             | oC              |

Listing 12  
 Vital Signs

| Center           | Patient | Visit     | Assessment Date                 | Parameter                       | Recorded Result | Recorded Units | Converted Result | Converted Units |
|------------------|---------|-----------|---------------------------------|---------------------------------|-----------------|----------------|------------------|-----------------|
| XVO_001          | 103     | Day 6     | 19JAN2010                       | Respiration Rate                | 16              | bpm            | 16.0             | bpm             |
|                  |         |           |                                 | SaO2                            | 94              | %              | 94.0             | %               |
|                  | Day 14  | 26JAN2010 | Supine Systolic Blood Pressure  | 111                             | mmHg            | 111.0          | mmHg             |                 |
|                  |         |           | Supine Diastolic Blood Pressure | 76                              | mmHg            | 76.0           | mmHg             |                 |
|                  |         |           | Pulse Rate                      | 70                              | bpm             | 70.0           | bpm              |                 |
|                  |         |           | Respiration Rate                | 16                              | bpm             | 16.0           | bpm              |                 |
|                  |         |           | Body Weight                     | 85.8                            | kg              | 85.8           | kg               |                 |
|                  | Day 30  | 09FEB2010 | Supine Systolic Blood Pressure  | 102                             | mmHg            | 102.0          | mmHg             |                 |
|                  |         |           | Supine Diastolic Blood Pressure | 64                              | mmHg            | 64.0           | mmHg             |                 |
|                  |         |           | Pulse Rate                      | 61                              | bpm             | 61.0           | bpm              |                 |
|                  |         |           | Temperature                     | 36.5                            | oC              | 36.5           | oC               |                 |
|                  |         |           | Respiration Rate                | 18                              | bpm             | 18.0           | bpm              |                 |
|                  | Day 42  | 19FEB2010 | Supine Systolic Blood Pressure  | 121                             | mmHg            | 121.0          | mmHg             |                 |
|                  |         |           | Supine Diastolic Blood Pressure | 78                              | mmHg            | 78.0           | mmHg             |                 |
|                  |         |           | Pulse Rate                      | 54                              | bpm             | 54.0           | bpm              |                 |
| Temperature      |         |           | 35.2                            | oC                              | 35.2            | oC             |                  |                 |
| Respiration Rate |         |           | 18                              | bpm                             | 18.0            | bpm            |                  |                 |
| XVO_003          | 201     | Screening | 10NOV2009                       | Supine Systolic Blood Pressure  | 138             | mmHg           | 138.0            | mmHg            |
|                  |         |           |                                 | Supine Diastolic Blood Pressure | 80              | mmHg           | 80.0             | mmHg            |
|                  |         |           |                                 | Pulse Rate                      | 70              | bpm            | 70.0             | bpm             |
|                  |         |           |                                 | Temperature                     | 98.3            | oF             | 36.8             | oC              |
|                  |         |           |                                 | Respiration Rate                | 16              | bpm            | 16.0             | bpm             |
|                  |         |           |                                 | SaO2                            | 97              | %              | 97.0             | %               |
|                  |         |           |                                 | Body Weight                     | 134.7           | lb             | 61.1             | kg              |
|                  |         |           |                                 | Height                          | 66              | ins            | 167.6            | cm              |



Listing 12  
Vital Signs

| Center           | Patient | Visit          | Assessment Date | Parameter                       | Recorded Result | Recorded Units | Converted Result | Converted Units |
|------------------|---------|----------------|-----------------|---------------------------------|-----------------|----------------|------------------|-----------------|
| XVO_003          | 201     | Day 0 Pre-dose | 17NOV2009       | Supine Systolic Blood Pressure  | 116             | mmHg           | 116.0            | mmHg            |
|                  |         |                |                 | Supine Diastolic Blood Pressure | 67              | mmHg           | 67.0             | mmHg            |
|                  |         |                |                 | Pulse Rate                      | 80              | bpm            | 80.0             | bpm             |
|                  |         |                |                 | Temperature                     | 96.8            | oF             | 36.0             | oC              |
|                  |         |                |                 | Respiration Rate                | 22              | bpm            | 22.0             | bpm             |
|                  |         |                |                 | SaO2                            | 98              | %              | 98.0             | %               |
|                  |         |                |                 | Body Weight                     | 135             | lb             | 61.2             | kg              |
|                  |         | 5 Minutes      | 17NOV2009       | Supine Systolic Blood Pressure  | 128             | mmHg           | 128.0            | mmHg            |
|                  |         |                |                 | Supine Diastolic Blood Pressure | 78              | mmHg           | 78.0             | mmHg            |
|                  |         |                |                 | Pulse Rate                      | 74              | bpm            | 74.0             | bpm             |
|                  |         |                |                 | Temperature                     | 98.6            | oF             | 37.0             | oC              |
|                  |         |                |                 | Respiration Rate                | 20              | bpm            | 20.0             | bpm             |
|                  |         | 15 Minutes     | 17NOV2009       | Supine Systolic Blood Pressure  | 133             | mmHg           | 133.0            | mmHg            |
|                  |         |                |                 | Supine Diastolic Blood Pressure | 78              | mmHg           | 78.0             | mmHg            |
|                  |         |                |                 | Pulse Rate                      | 74              | bpm            | 74.0             | bpm             |
|                  |         |                |                 | Temperature                     | 97.8            | oF             | 36.6             | oC              |
|                  |         |                |                 | Respiration Rate                | 24              | bpm            | 24.0             | bpm             |
|                  |         | 30 Minutes     | 17NOV2009       | Supine Systolic Blood Pressure  | 139             | mmHg           | 139.0            | mmHg            |
|                  |         |                |                 | Supine Diastolic Blood Pressure | 82              | mmHg           | 82.0             | mmHg            |
|                  |         |                |                 | Pulse Rate                      | 84              | bpm            | 84.0             | bpm             |
| Temperature      | 97.8    |                |                 | oF                              | 36.6            | oC             |                  |                 |
| Respiration Rate | 24      |                |                 | bpm                             | 24.0            | bpm            |                  |                 |
|                  |         |                |                 | SaO2                            | 97              | %              | 97.0             | %               |

Listing 12  
Vital Signs

| Center           | Patient   | Visit                          | Assessment Date | Parameter                       | Recorded Result | Recorded Units | Converted Result | Converted Units |
|------------------|-----------|--------------------------------|-----------------|---------------------------------|-----------------|----------------|------------------|-----------------|
| XVO_003          | 201       | 60 Minutes                     | 17NOV2009       | Supine Systolic Blood Pressure  | 147             | mmHg           | 147.0            | mmHg            |
|                  |           |                                |                 | Supine Diastolic Blood Pressure | 80              | mmHg           | 80.0             | mmHg            |
|                  |           |                                |                 | Pulse Rate                      | 74              | bpm            | 74.0             | bpm             |
|                  |           |                                |                 | Temperature                     | 97.8            | oF             | 36.6             | oC              |
|                  |           |                                |                 | Respiration Rate                | 20              | bpm            | 20.0             | bpm             |
|                  |           |                                |                 | SaO2                            | 97              | %              | 97.0             | %               |
|                  |           | 4 - 6 Hours                    | 17NOV2009       | Supine Systolic Blood Pressure  | 107             | mmHg           | 107.0            | mmHg            |
|                  |           |                                |                 | Supine Diastolic Blood Pressure | 62              | mmHg           | 62.0             | mmHg            |
|                  |           |                                |                 | Pulse Rate                      | 85              | bpm            | 85.0             | bpm             |
|                  |           |                                |                 | Temperature                     | 97.5            | oF             | 36.4             | oC              |
|                  |           |                                |                 | Respiration Rate                | 20              | bpm            | 20.0             | bpm             |
|                  |           |                                |                 | SaO2                            | 97              | %              | 97.0             | %               |
|                  |           | Day 1                          | 18NOV2009       | Supine Systolic Blood Pressure  | 134             | mmHg           | 134.0            | mmHg            |
|                  |           |                                |                 | Supine Diastolic Blood Pressure | 79              | mmHg           | 79.0             | mmHg            |
|                  |           |                                |                 | Pulse Rate                      | 90              | bpm            | 90.0             | bpm             |
|                  |           |                                |                 | Temperature                     | 36.3            | oC             | 36.3             | oC              |
|                  |           |                                |                 | Respiration Rate                | 18              | bpm            | 18.0             | bpm             |
|                  |           |                                |                 | SaO2                            | 98              | %              | 98.0             | %               |
|                  |           | Day 2                          | 19NOV2009       | Supine Systolic Blood Pressure  | 129             | mmHg           | 129.0            | mmHg            |
|                  |           |                                |                 | Supine Diastolic Blood Pressure | 76              | mmHg           | 76.0             | mmHg            |
|                  |           |                                |                 | Pulse Rate                      | 90              | bpm            | 90.0             | bpm             |
| Temperature      | 98.2      |                                |                 | oF                              | 36.8            | oC             |                  |                 |
| Respiration Rate | 20        |                                |                 | bpm                             | 20.0            | bpm            |                  |                 |
| SaO2             | 97        |                                |                 | %                               | 97.0            | %              |                  |                 |
| Day 3            | 20NOV2009 | Supine Systolic Blood Pressure | 105             | mmHg                            | 105.0           | mmHg           |                  |                 |

Listing 12  
 Vital Signs

| Center           | Patient   | Visit                           | Assessment Date | Parameter                       | Recorded Result | Recorded Units | Converted Result | Converted Units |
|------------------|-----------|---------------------------------|-----------------|---------------------------------|-----------------|----------------|------------------|-----------------|
| XVO_003          | 201       | Day 3                           | 20NOV2009       | Supine Diastolic Blood Pressure | 69              | mmHg           | 69.0             | mmHg            |
|                  |           |                                 |                 | Pulse Rate                      | 91              | bpm            | 91.0             | bpm             |
|                  |           |                                 |                 | Temperature                     | 97.5            | oF             | 36.4             | oC              |
|                  |           |                                 |                 | SaO2                            | 97              | %              | 97.0             | %               |
|                  |           | Day 6                           | 23NOV2009       | Supine Systolic Blood Pressure  | 120             | mmHg           | 120.0            | mmHg            |
|                  |           |                                 |                 | Supine Diastolic Blood Pressure | 75              | mmHg           | 75.0             | mmHg            |
|                  |           |                                 |                 | Pulse Rate                      | 92              | bpm            | 92.0             | bpm             |
|                  |           |                                 |                 | Temperature                     | 97.5            | oF             | 36.4             | oC              |
|                  |           |                                 |                 | Respiration Rate                | 18              | bpm            | 18.0             | bpm             |
|                  |           |                                 |                 | SaO2                            | 98              | %              | 98.0             | %               |
|                  |           | Day 14                          | 02DEC2009       | Supine Systolic Blood Pressure  | 95              | mmHg           | 95.0             | mmHg            |
|                  |           |                                 |                 | Supine Diastolic Blood Pressure | 88              | mmHg           | 88.0             | mmHg            |
|                  |           |                                 |                 | Pulse Rate                      | 101             | bpm            | 101.0            | bpm             |
|                  |           |                                 |                 | Temperature                     | 98              | oF             | 36.7             | oC              |
|                  |           |                                 |                 | Respiration Rate                | 20              | bpm            | 20.0             | bpm             |
|                  |           |                                 |                 | SaO2                            | 97              | %              | 97.0             | %               |
|                  |           | Body Weight                     |                 | 136.4                           | lb              | 61.9           | kg               |                 |
|                  |           |                                 |                 |                                 |                 |                |                  |                 |
|                  |           | Day 30                          | 22DEC2009       | Supine Systolic Blood Pressure  | 141             | mmHg           | 141.0            | mmHg            |
|                  |           |                                 |                 | Supine Diastolic Blood Pressure | 82              | mmHg           | 82.0             | mmHg            |
| Pulse Rate       | 100       |                                 |                 | bpm                             | 100.0           | bpm            |                  |                 |
| Temperature      | 96.8      |                                 |                 | oF                              | 36.0            | oC             |                  |                 |
| Respiration Rate | 20        |                                 |                 | bpm                             | 20.0            | bpm            |                  |                 |
| SaO2             | 97        | %                               | 97.0            | %                               |                 |                |                  |                 |
| Day 42           | 29DEC2009 | Supine Systolic Blood Pressure  | 110             | mmHg                            | 110.0           | mmHg           |                  |                 |
|                  |           | Supine Diastolic Blood Pressure | 75              | mmHg                            | 75.0            | mmHg           |                  |                 |

Listing 12  
Vital Signs

| Center           | Patient   | Visit                           | Assessment Date | Parameter                       | Recorded Result | Recorded Units | Converted Result | Converted Units |
|------------------|-----------|---------------------------------|-----------------|---------------------------------|-----------------|----------------|------------------|-----------------|
| XVO_003          | 201       | Day 42                          | 29DEC2009       | Pulse Rate                      | 108             | bpm            | 108.0            | bpm             |
|                  |           |                                 |                 | Temperature                     | 98.2            | oF             | 36.8             | oC              |
|                  |           |                                 |                 | Respiration Rate                | 22              | bpm            | 22.0             | bpm             |
|                  |           |                                 |                 | SaO2                            | 96              | %              | 96.0             | %               |
| XVO_005          | 301       | Screening                       | 03AUG2009       | Supine Systolic Blood Pressure  | 115             | mmHg           | 115.0            | mmHg            |
|                  |           |                                 |                 | Supine Diastolic Blood Pressure | 70              | mmHg           | 70.0             | mmHg            |
|                  |           |                                 |                 | Pulse Rate                      | 67              | bpm            | 67.0             | bpm             |
|                  |           |                                 |                 | Temperature                     | 98.3            | oF             | 36.8             | oC              |
|                  |           |                                 |                 | Respiration Rate                | 20              | bpm            | 20.0             | bpm             |
|                  |           |                                 |                 | SaO2                            | 97              | %              | 97.0             | %               |
|                  |           |                                 |                 | Body Weight                     | 270.8           | lb             | 122.8            | kg              |
|                  |           |                                 |                 | Height                          | 176             | cm             | 176.0            | cm              |
|                  |           | Day 0 Pre-dose                  | 04AUG2009       | Supine Systolic Blood Pressure  | 136             | mmHg           | 136.0            | mmHg            |
|                  |           |                                 |                 | Supine Diastolic Blood Pressure | 69              | mmHg           | 69.0             | mmHg            |
|                  |           |                                 |                 | Pulse Rate                      | 76              | bpm            | 76.0             | bpm             |
|                  |           |                                 |                 | Temperature                     | 99.1            | oF             | 37.3             | oC              |
|                  |           |                                 |                 | Respiration Rate                | 20              | bpm            | 20.0             | bpm             |
| 5 Minutes        | 04AUG2009 | SaO2                            | 97              | %                               | 97.0            | %              |                  |                 |
|                  |           | Body Weight                     | 270             | lb                              | 122.5           | kg             |                  |                 |
|                  |           | Supine Systolic Blood Pressure  | 121             | mmHg                            | 121.0           | mmHg           |                  |                 |
|                  |           | Supine Diastolic Blood Pressure | 78              | mmHg                            | 78.0            | mmHg           |                  |                 |
|                  |           | Pulse Rate                      | 68              | bpm                             | 68.0            | bpm            |                  |                 |
| Temperature      | 99.1      | oF                              | 37.3            | oC                              |                 |                |                  |                 |
| Respiration Rate | 24        | bpm                             | 24.0            | bpm                             |                 |                |                  |                 |
| SaO2             | 98        | %                               | 98.0            | %                               |                 |                |                  |                 |

Listing 12  
Vital Signs

| Center      | Patient   | Visit                           | Assessment Date | Parameter                       | Recorded Result | Recorded Units | Converted Result | Converted Units |
|-------------|-----------|---------------------------------|-----------------|---------------------------------|-----------------|----------------|------------------|-----------------|
| XVO_005     | 301       | 15 Minutes                      | 04AUG2009       | Supine Systolic Blood Pressure  | 126             | mmHg           | 126.0            | mmHg            |
|             |           |                                 |                 | Supine Diastolic Blood Pressure | 87              | mmHg           | 87.0             | mmHg            |
|             |           |                                 |                 | Pulse Rate                      | 69              | bpm            | 69.0             | bpm             |
|             |           |                                 |                 | Temperature                     | 99.5            | oF             | 37.5             | oC              |
|             |           |                                 |                 | Respiration Rate                | 20              | bpm            | 20.0             | bpm             |
|             |           |                                 |                 | SaO2                            | 97              | %              | 97.0             | %               |
|             |           | 60 Minutes                      | 04AUG2009       | Supine Systolic Blood Pressure  | 128             | mmHg           | 128.0            | mmHg            |
|             |           |                                 |                 | Supine Diastolic Blood Pressure | 82              | mmHg           | 82.0             | mmHg            |
|             |           |                                 |                 | Pulse Rate                      | 65              | bpm            | 65.0             | bpm             |
|             |           |                                 |                 | Temperature                     | 99.1            | oF             | 37.3             | oC              |
|             |           |                                 |                 | Respiration Rate                | 20              | bpm            | 20.0             | bpm             |
|             |           |                                 |                 | SaO2                            | 97              | %              | 97.0             | %               |
|             |           | 4 - 6 Hours                     | 04AUG2009       | Supine Systolic Blood Pressure  | 122             | mmHg           | 122.0            | mmHg            |
|             |           |                                 |                 | Supine Diastolic Blood Pressure | 80              | mmHg           | 80.0             | mmHg            |
|             |           |                                 |                 | Pulse Rate                      | 79              | bpm            | 79.0             | bpm             |
|             |           |                                 |                 | Temperature                     | 98.9            | oF             | 37.2             | oC              |
|             |           |                                 |                 | Respiration Rate                | 20              | bpm            | 20.0             | bpm             |
|             |           |                                 |                 | SaO2                            | 98              | %              | 98.0             | %               |
|             |           | Day 1                           | 05AUG2009       | Supine Systolic Blood Pressure  | 118             | mmHg           | 118.0            | mmHg            |
|             |           |                                 |                 | Supine Diastolic Blood Pressure | 81              | mmHg           | 81.0             | mmHg            |
|             |           |                                 |                 | Pulse Rate                      | 77              | bpm            | 77.0             | bpm             |
| Temperature | 98.8      |                                 |                 | oF                              | 37.1            | oC             |                  |                 |
| SaO2        | 98        |                                 |                 | %                               | 98.0            | %              |                  |                 |
| Day 2       | 06AUG2009 | Supine Systolic Blood Pressure  | 120             | mmHg                            | 120.0           | mmHg           |                  |                 |
|             |           | Supine Diastolic Blood Pressure | 73              | mmHg                            | 73.0            | mmHg           |                  |                 |

Listing 12  
Vital Signs

| Center           | Patient   | Visit                           | Assessment Date | Parameter                       | Recorded Result | Recorded Units | Converted Result | Converted Units |
|------------------|-----------|---------------------------------|-----------------|---------------------------------|-----------------|----------------|------------------|-----------------|
| XVO_005          | 301       | Day 2                           | 06AUG2009       | Pulse Rate                      | 75              | bpm            | 75.0             | bpm             |
|                  |           |                                 |                 | Temperature                     | 97.8            | oF             | 36.6             | oC              |
|                  |           |                                 |                 | Respiration Rate                | 24              | bpm            | 24.0             | bpm             |
|                  |           |                                 |                 | SaO2                            | 97              | %              | 97.0             | %               |
|                  |           | Day 3                           | 07AUG2009       | Supine Systolic Blood Pressure  | 122             | mmHg           | 122.0            | mmHg            |
|                  |           |                                 |                 | Supine Diastolic Blood Pressure | 78              | mmHg           | 78.0             | mmHg            |
|                  |           |                                 |                 | Pulse Rate                      | 78              | bpm            | 78.0             | bpm             |
|                  |           |                                 |                 | Temperature                     | 97.9            | oF             | 36.6             | oC              |
|                  |           |                                 |                 | Respiration Rate                | 20              | bpm            | 20.0             | bpm             |
|                  |           |                                 |                 | SaO2                            | 97              | %              | 97.0             | %               |
|                  |           | Day 6                           | 10AUG2009       | Supine Systolic Blood Pressure  | 116             | mmHg           | 116.0            | mmHg            |
|                  |           |                                 |                 | Supine Diastolic Blood Pressure | 84              | mmHg           | 84.0             | mmHg            |
|                  |           |                                 |                 | Pulse Rate                      | 81              | bpm            | 81.0             | bpm             |
|                  |           |                                 |                 | Temperature                     | 99.1            | oF             | 37.3             | oC              |
|                  |           |                                 |                 | Respiration Rate                | 20              | bpm            | 20.0             | bpm             |
|                  |           |                                 |                 | SaO2                            | 96              | %              | 96.0             | %               |
|                  |           | Day 14                          | 18AUG2009       | Supine Systolic Blood Pressure  | 119             | mmHg           | 119.0            | mmHg            |
|                  |           |                                 |                 | Supine Diastolic Blood Pressure | 79              | mmHg           | 79.0             | mmHg            |
|                  |           |                                 |                 | Pulse Rate                      | 70              | bpm            | 70.0             | bpm             |
|                  |           |                                 |                 | Temperature                     | 97.9            | oF             | 36.6             | oC              |
| Respiration Rate | 20        |                                 |                 | bpm                             | 20.0            | bpm            |                  |                 |
| SaO2             | 96        |                                 |                 | %                               | 96.0            | %              |                  |                 |
| Day 30           | 04SEP2009 | Supine Systolic Blood Pressure  | 102             | mmHg                            | 102.0           | mmHg           |                  |                 |
|                  |           | Supine Diastolic Blood Pressure | 59              | mmHg                            | 59.0            | mmHg           |                  |                 |
|                  |           |                                 |                 | Body Weight                     | 272             | lb             | 123.4            | kg              |

Listing 12  
Vital Signs

| Center           | Patient | Visit          | Assessment Date                 | Parameter                       | Recorded Result | Recorded Units | Converted Result | Converted Units |
|------------------|---------|----------------|---------------------------------|---------------------------------|-----------------|----------------|------------------|-----------------|
| XVO_005          | 301     | Day 30         | 04SEP2009                       | Pulse Rate                      | 84              | bpm            | 84.0             | bpm             |
|                  |         |                |                                 | Temperature                     | 98.6            | oF             | 37.0             | oC              |
|                  |         |                |                                 | Respiration Rate                | 24              | bpm            | 24.0             | bpm             |
|                  |         |                |                                 | SaO2                            | 96              | %              | 96.0             | %               |
|                  | Day 42  | 15SEP2009      | Supine Systolic Blood Pressure  | 129                             | mmHg            | 129.0          | mmHg             |                 |
|                  |         |                | Supine Diastolic Blood Pressure | 75                              | mmHg            | 75.0           | mmHg             |                 |
|                  |         |                | Pulse Rate                      | 75                              | bpm             | 75.0           | bpm              |                 |
|                  |         |                | Temperature                     | 98.6                            | oF              | 37.0           | oC               |                 |
|                  |         |                | Respiration Rate                | 18                              | bpm             | 18.0           | bpm              |                 |
|                  |         |                | SaO2                            | 97                              | %               | 97.0           | %                |                 |
|                  | 302     | Screening      | 14DEC2009                       | Supine Systolic Blood Pressure  | 135             | mmHg           | 135.0            | mmHg            |
|                  |         |                |                                 | Supine Diastolic Blood Pressure | 70              | mmHg           | 70.0             | mmHg            |
|                  |         |                |                                 | Pulse Rate                      | 64              | bpm            | 64.0             | bpm             |
|                  |         |                |                                 | Temperature                     | 97.9            | oF             | 36.6             | oC              |
|                  |         |                |                                 | Respiration Rate                | 15              | bpm            | 15.0             | bpm             |
|                  |         |                |                                 | SaO2                            | 95              | %              | 95.0             | %               |
|                  |         | Body Weight    | 81.3                            | kg                              | 81.3            | kg             |                  |                 |
|                  |         | Height         | 170.4                           | cm                              | 170.4           | cm             |                  |                 |
|                  |         | Day 0 Pre-dose | 15DEC2009                       | Supine Systolic Blood Pressure  | 137             | mmHg           | 137.0            | mmHg            |
|                  |         |                |                                 | Supine Diastolic Blood Pressure | 66              | mmHg           | 66.0             | mmHg            |
| Pulse Rate       | 65      |                |                                 | bpm                             | 65.0            | bpm            |                  |                 |
| Temperature      | 98.8    |                |                                 | oF                              | 37.1            | oC             |                  |                 |
| Respiration Rate | 20      | bpm            | 20.0                            | bpm                             |                 |                |                  |                 |
| SaO2             | 94      | %              | 94.0                            | %                               |                 |                |                  |                 |
| Body Weight      | 180     | lb             | 81.6                            | kg                              |                 |                |                  |                 |

Listing 12  
Vital Signs

| Center           | Patient   | Visit                          | Assessment Date | Parameter                       | Recorded Result | Recorded Units | Converted Result | Converted Units |
|------------------|-----------|--------------------------------|-----------------|---------------------------------|-----------------|----------------|------------------|-----------------|
| XVO_005          | 302       | 5 Minutes                      | 15DEC2009       | Supine Systolic Blood Pressure  | 123             | mmHg           | 123.0            | mmHg            |
|                  |           |                                |                 | Supine Diastolic Blood Pressure | 67              | mmHg           | 67.0             | mmHg            |
|                  |           |                                |                 | Pulse Rate                      | 61              | bpm            | 61.0             | bpm             |
|                  |           |                                |                 | Temperature                     | 98.1            | oF             | 36.7             | oC              |
|                  |           |                                |                 | Respiration Rate                | 20              | bpm            | 20.0             | bpm             |
|                  |           |                                |                 | SaO2                            | 92              | %              | 92.0             | %               |
|                  |           | 15 Minutes                     | 15DEC2009       | Supine Systolic Blood Pressure  | 107             | mmHg           | 107.0            | mmHg            |
|                  |           |                                |                 | Supine Diastolic Blood Pressure | 67              | mmHg           | 67.0             | mmHg            |
|                  |           |                                |                 | Pulse Rate                      | 61              | bpm            | 61.0             | bpm             |
|                  |           |                                |                 | Temperature                     | 97.8            | oF             | 36.6             | oC              |
|                  |           |                                |                 | Respiration Rate                | 18              | bpm            | 18.0             | bpm             |
|                  |           |                                |                 | SaO2                            | 93              | %              | 93.0             | %               |
|                  |           | 60 Minutes                     | 15DEC2009       | Supine Systolic Blood Pressure  | 125             | mmHg           | 125.0            | mmHg            |
|                  |           |                                |                 | Supine Diastolic Blood Pressure | 71              | mmHg           | 71.0             | mmHg            |
|                  |           |                                |                 | Pulse Rate                      | 61              | bpm            | 61.0             | bpm             |
|                  |           |                                |                 | Temperature                     | 98.1            | oF             | 36.7             | oC              |
|                  |           |                                |                 | Respiration Rate                | 18              | bpm            | 18.0             | bpm             |
|                  |           |                                |                 | SaO2                            | 96              | %              | 96.0             | %               |
|                  |           | 4 - 6 Hours                    | 15DEC2009       | Supine Systolic Blood Pressure  | 125             | mmHg           | 125.0            | mmHg            |
|                  |           |                                |                 | Supine Diastolic Blood Pressure | 64              | mmHg           | 64.0             | mmHg            |
|                  |           |                                |                 | Pulse Rate                      | 71              | bpm            | 71.0             | bpm             |
| Temperature      | 98        |                                |                 | oF                              | 36.7            | oC             |                  |                 |
| Respiration Rate | 16        |                                |                 | bpm                             | 16.0            | bpm            |                  |                 |
| SaO2             | 95        |                                |                 | %                               | 95.0            | %              |                  |                 |
| Day 1            | 16DEC2009 | Supine Systolic Blood Pressure | 134             | mmHg                            | 134.0           | mmHg           |                  |                 |



Listing 12  
Vital Signs

| Center  | Patient   | Visit                           | Assessment Date | Parameter                       | Recorded Result | Recorded Units | Converted Result | Converted Units |
|---------|-----------|---------------------------------|-----------------|---------------------------------|-----------------|----------------|------------------|-----------------|
| XVO_005 | 302       | Day 1                           | 16DEC2009       | Supine Diastolic Blood Pressure | 71              | mmHg           | 71.0             | mmHg            |
|         |           |                                 |                 | Pulse Rate                      | 72              | bpm            | 72.0             | bpm             |
|         |           |                                 |                 | Temperature                     | 99.3            | oF             | 37.4             | oC              |
|         |           |                                 |                 | Respiration Rate                | 20              | bpm            | 20.0             | bpm             |
|         |           |                                 |                 | SaO2                            | 95              | %              | 95.0             | %               |
|         |           | Day 2                           | 17DEC2009       | Supine Systolic Blood Pressure  | 139             | mmHg           | 139.0            | mmHg            |
|         |           |                                 |                 | Supine Diastolic Blood Pressure | 72              | mmHg           | 72.0             | mmHg            |
|         |           |                                 |                 | Pulse Rate                      | 71              | bpm            | 71.0             | bpm             |
|         |           |                                 |                 | Temperature                     | 98.9            | oF             | 37.2             | oC              |
|         |           |                                 |                 | Respiration Rate                | 20              | bpm            | 20.0             | bpm             |
|         |           | Day 3                           | 18DEC2009       | Supine Systolic Blood Pressure  | 153             | mmHg           | 153.0            | mmHg            |
|         |           |                                 |                 | Supine Diastolic Blood Pressure | 78              | mmHg           | 78.0             | mmHg            |
|         |           |                                 |                 | Pulse Rate                      | 67              | bpm            | 67.0             | bpm             |
|         |           |                                 |                 | Temperature                     | 97.8            | oF             | 36.6             | oC              |
|         |           |                                 |                 | Respiration Rate                | 18              | bpm            | 18.0             | bpm             |
|         |           | Day 6                           | 21DEC2009       | Supine Systolic Blood Pressure  | 138             | mmHg           | 138.0            | mmHg            |
|         |           |                                 |                 | Supine Diastolic Blood Pressure | 73              | mmHg           | 73.0             | mmHg            |
|         |           |                                 |                 | Pulse Rate                      | 67              | bpm            | 67.0             | bpm             |
|         |           |                                 |                 | Temperature                     | 98.5            | oF             | 36.9             | oC              |
|         |           |                                 |                 | Respiration Rate                | 18              | bpm            | 18.0             | bpm             |
| Day 14  | 29DEC2009 | Supine Systolic Blood Pressure  | 141             | mmHg                            | 141.0           | mmHg           |                  |                 |
|         |           | Supine Diastolic Blood Pressure | 76              | mmHg                            | 76.0            | mmHg           |                  |                 |

Listing 12  
Vital Signs

| Center  | Patient | Visit     | Assessment Date                 | Parameter                       | Recorded Result | Recorded Units | Converted Result | Converted Units |
|---------|---------|-----------|---------------------------------|---------------------------------|-----------------|----------------|------------------|-----------------|
| XVO_005 | 302     | Day 14    | 29DEC2009                       | Pulse Rate                      | 66              | bpm            | 66.0             | bpm             |
|         |         |           |                                 | Temperature                     | 98.2            | oF             | 36.8             | oC              |
|         |         |           |                                 | Respiration Rate                | 18              | bpm            | 18.0             | bpm             |
|         |         |           |                                 | SaO2                            | 95              | %              | 95.0             | %               |
|         |         |           |                                 | Body Weight                     | 178             | lb             | 80.7             | kg              |
|         | Day 30  | 15JAN2010 | Supine Systolic Blood Pressure  | 138                             | mmHg            | 138.0          | mmHg             |                 |
|         |         |           | Supine Diastolic Blood Pressure | 75                              | mmHg            | 75.0           | mmHg             |                 |
|         |         |           | Pulse Rate                      | 65                              | bpm             | 65.0           | bpm              |                 |
|         |         |           | Temperature                     | 98.3                            | oF              | 36.8           | oC               |                 |
|         |         |           | Respiration Rate                | 20                              | bpm             | 20.0           | bpm              |                 |
|         | Day 42  | 25JAN2010 | Supine Systolic Blood Pressure  | 147                             | mmHg            | 147.0          | mmHg             |                 |
|         |         |           | Supine Diastolic Blood Pressure | 72                              | mmHg            | 72.0           | mmHg             |                 |
|         |         |           | Pulse Rate                      | 65                              | bpm             | 65.0           | bpm              |                 |
|         |         |           | Temperature                     | 97.8                            | oF              | 36.6           | oC               |                 |
|         |         |           | Respiration Rate                | 18                              | bpm             | 18.0           | bpm              |                 |
|         |         |           | SaO2                            | 97                              | %               | 97.0           | %                |                 |
| XVO_007 | 401     | Screening | 04NOV2009                       | Supine Systolic Blood Pressure  | 148             | mmHg           | 148.0            | mmHg            |
|         |         |           |                                 | Supine Diastolic Blood Pressure | 76              | mmHg           | 76.0             | mmHg            |
|         |         |           |                                 | Pulse Rate                      | 74              | bpm            | 74.0             | bpm             |
|         |         |           |                                 | Temperature                     | 36.8            | oC             | 36.8             | oC              |
|         |         |           |                                 | Respiration Rate                | 20              | bpm            | 20.0             | bpm             |
|         |         |           |                                 | SaO2                            | 95              | %              | 95.0             | %               |
|         |         |           |                                 | Body Weight                     | 209             | lb             | 94.8             | kg              |
|         |         |           |                                 | Height                          | 152.4           | cm             | 152.4            | cm              |

Listing 12  
Vital Signs

| Center                          | Patient | Visit          | Assessment Date | Parameter                       | Recorded Result | Recorded Units | Converted Result | Converted Units |
|---------------------------------|---------|----------------|-----------------|---------------------------------|-----------------|----------------|------------------|-----------------|
| XVO_007                         | 401     | Day 0 Pre-dose | 10NOV2009       | Supine Systolic Blood Pressure  | 141             | mmHg           | 141.0            | mmHg            |
|                                 |         |                |                 | Supine Diastolic Blood Pressure | 77              | mmHg           | 77.0             | mmHg            |
|                                 |         |                |                 | Pulse Rate                      | 81              | bpm            | 81.0             | bpm             |
|                                 |         |                |                 | Temperature                     | 36.8            | oC             | 36.8             | oC              |
|                                 |         |                |                 | Respiration Rate                | 24              | bpm            | 24.0             | bpm             |
|                                 |         |                |                 | SaO2                            | 98              | %              | 98.0             | %               |
|                                 |         |                |                 | Body Weight                     | 94.5            | kg             | 94.5             | kg              |
|                                 |         | 5 Minutes      | 10NOV2009       | Supine Systolic Blood Pressure  | 156             | mmHg           | 156.0            | mmHg            |
|                                 |         |                |                 | Supine Diastolic Blood Pressure | 85              | mmHg           | 85.0             | mmHg            |
|                                 |         |                |                 | Pulse Rate                      | 83              | bpm            | 83.0             | bpm             |
|                                 |         |                |                 | Temperature                     | 36.7            | oC             | 36.7             | oC              |
|                                 |         | 15 Minutes     | 10NOV2009       | Supine Systolic Blood Pressure  | 157             | mmHg           | 157.0            | mmHg            |
|                                 |         |                |                 | Supine Diastolic Blood Pressure | 81              | mmHg           | 81.0             | mmHg            |
|                                 |         |                |                 | Pulse Rate                      | 84              | bpm            | 84.0             | bpm             |
|                                 |         |                |                 | Temperature                     | 36.7            | oC             | 36.7             | oC              |
|                                 |         | 30 Minutes     | 10NOV2009       | Supine Systolic Blood Pressure  | 148             | mmHg           | 148.0            | mmHg            |
|                                 |         |                |                 | Supine Diastolic Blood Pressure | 75              | mmHg           | 75.0             | mmHg            |
|                                 |         |                |                 | Pulse Rate                      | 71              | bpm            | 71.0             | bpm             |
|                                 |         |                |                 | Temperature                     | 36.6            | oC             | 36.6             | oC              |
|                                 |         | 60 Minutes     | 10NOV2009       | Respiration Rate                | 26              | bpm            | 26.0             | bpm             |
| SaO2                            | 97      |                |                 | %                               | 97.0            | %              |                  |                 |
| Supine Systolic Blood Pressure  | 141     |                |                 | mmHg                            | 141.0           | mmHg           |                  |                 |
| Supine Diastolic Blood Pressure | 68      |                |                 | mmHg                            | 68.0            | mmHg           |                  |                 |

Listing 12  
Vital Signs

| Center  | Patient   | Visit                           | Assessment Date | Parameter                       | Recorded Result | Recorded Units | Converted Result | Converted Units |
|---------|-----------|---------------------------------|-----------------|---------------------------------|-----------------|----------------|------------------|-----------------|
| XVO_007 | 401       | 60 Minutes                      | 10NOV2009       | Pulse Rate                      | 76              | bpm            | 76.0             | bpm             |
|         |           |                                 |                 | Temperature                     | 36.6            | oC             | 36.6             | oC              |
|         |           |                                 |                 | Respiration Rate                | 22              | bpm            | 22.0             | bpm             |
|         |           |                                 |                 | SaO2                            | 98              | %              | 98.0             | %               |
|         |           | 4 - 6 Hours                     | 10NOV2009       | Supine Systolic Blood Pressure  | 140             | mmHg           | 140.0            | mmHg            |
|         |           |                                 |                 | Supine Diastolic Blood Pressure | 72              | mmHg           | 72.0             | mmHg            |
|         |           |                                 |                 | Pulse Rate                      | 77              | bpm            | 77.0             | bpm             |
|         |           |                                 |                 | Temperature                     | 36.6            | oC             | 36.6             | oC              |
|         |           |                                 |                 | Respiration Rate                | 22              | bpm            | 22.0             | bpm             |
|         |           |                                 |                 | SaO2                            | 97              | %              | 97.0             | %               |
|         |           | Day 1                           | 11NOV2009       | Supine Systolic Blood Pressure  | 141             | mmHg           | 141.0            | mmHg            |
|         |           |                                 |                 | Supine Diastolic Blood Pressure | 67              | mmHg           | 67.0             | mmHg            |
|         |           |                                 |                 | Pulse Rate                      | 62              | bpm            | 62.0             | bpm             |
|         |           |                                 |                 | Temperature                     | 36.3            | oC             | 36.3             | oC              |
|         |           |                                 |                 | Respiration Rate                | 20              | bpm            | 20.0             | bpm             |
|         |           | Day 2                           | 12NOV2009       | SaO2                            | 97              | %              | 97.0             | %               |
|         |           |                                 |                 | Supine Systolic Blood Pressure  | 129             | mmHg           | 129.0            | mmHg            |
|         |           |                                 |                 | Supine Diastolic Blood Pressure | 71              | mmHg           | 71.0             | mmHg            |
|         |           |                                 |                 | Pulse Rate                      | 73              | bpm            | 73.0             | bpm             |
|         |           |                                 |                 | Temperature                     | 36.7            | oC             | 36.7             | oC              |
| Day 3   | 13NOV2009 | Respiration Rate                | 22              | bpm                             | 22.0            | bpm            |                  |                 |
|         |           | SaO2                            | 97              | %                               | 97.0            | %              |                  |                 |
|         |           | Supine Systolic Blood Pressure  | 133             | mmHg                            | 133.0           | mmHg           |                  |                 |
|         |           | Supine Diastolic Blood Pressure | 77              | mmHg                            | 77.0            | mmHg           |                  |                 |
|         |           |                                 |                 | Pulse Rate                      | 72              | bpm            | 72.0             | bpm             |

Listing 12  
 Vital Signs

| Center  | Patient   | Visit                           | Assessment Date | Parameter                       | Recorded Result | Recorded Units | Converted Result | Converted Units |
|---------|-----------|---------------------------------|-----------------|---------------------------------|-----------------|----------------|------------------|-----------------|
| XVO_007 | 401       | Day 3                           | 13NOV2009       | Temperature                     | 36.5            | oC             | 36.5             | oC              |
|         |           |                                 |                 | Respiration Rate                | 24              | bpm            | 24.0             | bpm             |
|         |           |                                 |                 | SaO2                            | 97              | %              | 97.0             | %               |
|         |           | Day 6                           | 16NOV2009       | Supine Systolic Blood Pressure  | 131             | mmHg           | 131.0            | mmHg            |
|         |           |                                 |                 | Supine Diastolic Blood Pressure | 69              | mmHg           | 69.0             | mmHg            |
|         |           |                                 |                 | Pulse Rate                      | 65              | bpm            | 65.0             | bpm             |
|         |           |                                 |                 | Temperature                     | 36.6            | oC             | 36.6             | oC              |
|         |           |                                 |                 | Respiration Rate                | 22              | bpm            | 22.0             | bpm             |
|         |           |                                 |                 | SaO2                            | 96              | %              | 96.0             | %               |
|         |           | Day 14                          | 24NOV2009       | Supine Systolic Blood Pressure  | 147             | mmHg           | 147.0            | mmHg            |
|         |           |                                 |                 | Supine Diastolic Blood Pressure | 67              | mmHg           | 67.0             | mmHg            |
|         |           |                                 |                 | Pulse Rate                      | 61              | bpm            | 61.0             | bpm             |
|         |           |                                 |                 | Temperature                     | 36.6            | oC             | 36.6             | oC              |
|         |           |                                 |                 | Respiration Rate                | 22              | bpm            | 22.0             | bpm             |
|         |           |                                 |                 | SaO2                            | 97              | %              | 97.0             | %               |
|         |           |                                 |                 | Body Weight                     | 95              | kg             | 95.0             | kg              |
|         |           | Day 30                          | 08DEC2009       | Supine Systolic Blood Pressure  | 150             | mmHg           | 150.0            | mmHg            |
|         |           |                                 |                 | Supine Diastolic Blood Pressure | 76              | mmHg           | 76.0             | mmHg            |
|         |           |                                 |                 | Pulse Rate                      | 72              | bpm            | 72.0             | bpm             |
|         |           |                                 |                 | Temperature                     | 36.7            | oC             | 36.7             | oC              |
|         |           |                                 |                 | Respiration Rate                | 20              | bpm            | 20.0             | bpm             |
| Day 42  | 22DEC2009 | Supine Systolic Blood Pressure  | 156             | mmHg                            | 156.0           | mmHg           |                  |                 |
|         |           | Supine Diastolic Blood Pressure | 87              | mmHg                            | 87.0            | mmHg           |                  |                 |
|         |           | Pulse Rate                      | 90              | bpm                             | 90.0            | bpm            |                  |                 |

Listing 12  
Vital Signs

| Center      | Patient    | Visit          | Assessment Date                 | Parameter                       | Recorded Result | Recorded Units | Converted Result | Converted Units |
|-------------|------------|----------------|---------------------------------|---------------------------------|-----------------|----------------|------------------|-----------------|
| XVO_007     | 401        | Day 42         | 22DEC2009                       | Temperature                     | 36.6            | oC             | 36.6             | oC              |
|             |            |                |                                 | Respiration Rate                | 18              | bpm            | 18.0             | bpm             |
|             |            |                |                                 | SaO2                            | 97              | %              | 97.0             | %               |
|             | 402        | Screening      | 03DEC2009                       | Supine Systolic Blood Pressure  | 124             | mmHg           | 124.0            | mmHg            |
|             |            |                |                                 | Supine Diastolic Blood Pressure | 84              | mmHg           | 84.0             | mmHg            |
|             |            |                |                                 | Pulse Rate                      | 60              | bpm            | 60.0             | bpm             |
|             |            |                |                                 | Temperature                     | 36.7            | oC             | 36.7             | oC              |
|             |            |                |                                 | Respiration Rate                | 20              | bpm            | 20.0             | bpm             |
|             |            |                |                                 | SaO2                            | 99              | %              | 99.0             | %               |
|             |            |                |                                 | Body Weight                     | 71.3            | kg             | 71.3             | kg              |
|             | 402        | Day 0 Pre-dose | 08DEC2009                       | Supine Systolic Blood Pressure  | 117             | mmHg           | 117.0            | mmHg            |
|             |            |                |                                 | Supine Diastolic Blood Pressure | 83              | mmHg           | 83.0             | mmHg            |
|             |            |                |                                 | Pulse Rate                      | 73              | bpm            | 73.0             | bpm             |
|             |            |                |                                 | Temperature                     | 36.8            | oC             | 36.8             | oC              |
|             |            |                |                                 | Respiration Rate                | 18              | bpm            | 18.0             | bpm             |
| SaO2        |            |                |                                 | 98                              | %               | 98.0           | %                |                 |
| Body Weight |            |                |                                 | 70.7                            | kg              | 70.7           | kg               |                 |
| 402         | 5 Minutes  | 08DEC2009      | Supine Systolic Blood Pressure  | 124                             | mmHg            | 124.0          | mmHg             |                 |
|             |            |                | Supine Diastolic Blood Pressure | 87                              | mmHg            | 87.0           | mmHg             |                 |
|             |            |                | Pulse Rate                      | 58                              | bpm             | 58.0           | bpm              |                 |
|             |            |                | Temperature                     | 36.6                            | oC              | 36.6           | oC               |                 |
|             |            |                | Respiration Rate                | 20                              | bpm             | 20.0           | bpm              |                 |
| 402         | 15 Minutes | 08DEC2009      | Supine Systolic Blood Pressure  | 104                             | mmHg            | 104.0          | mmHg             |                 |

Listing 12  
 Vital Signs

| Center  | Patient   | Visit                           | Assessment Date | Parameter                       | Recorded Result | Recorded Units | Converted Result | Converted Units |
|---------|-----------|---------------------------------|-----------------|---------------------------------|-----------------|----------------|------------------|-----------------|
| XVO_007 | 402       | 15 Minutes                      | 08DEC2009       | Supine Diastolic Blood Pressure | 68              | mmHg           | 68.0             | mmHg            |
|         |           |                                 |                 | Pulse Rate                      | 52              | bpm            | 52.0             | bpm             |
|         |           |                                 |                 | Temperature                     | 36.7            | oC             | 36.7             | oC              |
|         |           |                                 |                 | Respiration Rate                | 16              | bpm            | 16.0             | bpm             |
|         |           |                                 |                 | SaO2                            | 99              | %              | 99.0             | %               |
|         |           | 30 Minutes                      | 08DEC2009       | Supine Systolic Blood Pressure  | 124             | mmHg           | 124.0            | mmHg            |
|         |           |                                 |                 | Supine Diastolic Blood Pressure | 81              | mmHg           | 81.0             | mmHg            |
|         |           |                                 |                 | Pulse Rate                      | 53              | bpm            | 53.0             | bpm             |
|         |           |                                 |                 | Temperature                     | 36.5            | oC             | 36.5             | oC              |
|         |           |                                 |                 | Respiration Rate                | 16              | bpm            | 16.0             | bpm             |
|         |           | 60 Minutes                      | 08DEC2009       | Supine Systolic Blood Pressure  | 135             | mmHg           | 135.0            | mmHg            |
|         |           |                                 |                 | Supine Diastolic Blood Pressure | 92              | mmHg           | 92.0             | mmHg            |
|         |           |                                 |                 | Pulse Rate                      | 55              | bpm            | 55.0             | bpm             |
|         |           |                                 |                 | Temperature                     | 36.3            | oC             | 36.3             | oC              |
|         |           |                                 |                 | Respiration Rate                | 16              | bpm            | 16.0             | bpm             |
|         |           | 4 - 6 Hours                     | 08DEC2009       | Supine Systolic Blood Pressure  | 125             | mmHg           | 125.0            | mmHg            |
|         |           |                                 |                 | Supine Diastolic Blood Pressure | 85              | mmHg           | 85.0             | mmHg            |
|         |           |                                 |                 | Pulse Rate                      | 70              | bpm            | 70.0             | bpm             |
|         |           |                                 |                 | Temperature                     | 36.5            | oC             | 36.5             | oC              |
|         |           |                                 |                 | Respiration Rate                | 20              | bpm            | 20.0             | bpm             |
| Day 1   | 09DEC2009 | Supine Systolic Blood Pressure  | 135             | mmHg                            | 135.0           | mmHg           |                  |                 |
|         |           | Supine Diastolic Blood Pressure | 86              | mmHg                            | 86.0            | mmHg           |                  |                 |

Listing 12  
Vital Signs

| Center  | Patient   | Visit            | Assessment Date | Parameter                       | Recorded Result | Recorded Units | Converted Result | Converted Units |
|---------|-----------|------------------|-----------------|---------------------------------|-----------------|----------------|------------------|-----------------|
| XVO_007 | 402       | Day 1            | 09DEC2009       | Pulse Rate                      | 76              | bpm            | 76.0             | bpm             |
|         |           |                  |                 | Temperature                     | 36.7            | oC             | 36.7             | oC              |
|         |           |                  |                 | Respiration Rate                | 20              | bpm            | 20.0             | bpm             |
|         |           |                  |                 | SaO2                            | 100             | %              | 100.0            | %               |
|         |           | Day 2            | 10DEC2009       | Supine Systolic Blood Pressure  | 123             | mmHg           | 123.0            | mmHg            |
|         |           |                  |                 | Supine Diastolic Blood Pressure | 86              | mmHg           | 86.0             | mmHg            |
|         |           |                  |                 | Pulse Rate                      | 78              | bpm            | 78.0             | bpm             |
|         |           |                  |                 | Temperature                     | 36.6            | oC             | 36.6             | oC              |
|         |           | Day 3            | 11DEC2009       | Respiration Rate                | 20              | bpm            | 20.0             | bpm             |
|         |           |                  |                 | SaO2                            | 100             | %              | 100.0            | %               |
|         |           |                  |                 | Supine Systolic Blood Pressure  | 121             | mmHg           | 121.0            | mmHg            |
|         |           |                  |                 | Supine Diastolic Blood Pressure | 81              | mmHg           | 81.0             | mmHg            |
|         |           | Day 6            | 14DEC2009       | Pulse Rate                      | 79              | bpm            | 79.0             | bpm             |
|         |           |                  |                 | Temperature                     | 36.7            | oC             | 36.7             | oC              |
|         |           |                  |                 | Respiration Rate                | 20              | bpm            | 20.0             | bpm             |
|         |           |                  |                 | SaO2                            | 98              | %              | 98.0             | %               |
|         |           | Day 14           | 22DEC2009       | Supine Systolic Blood Pressure  | 126             | mmHg           | 126.0            | mmHg            |
|         |           |                  |                 | Supine Diastolic Blood Pressure | 84              | mmHg           | 84.0             | mmHg            |
|         |           |                  |                 | Pulse Rate                      | 72              | bpm            | 72.0             | bpm             |
|         |           |                  |                 | Temperature                     | 36.7            | oC             | 36.7             | oC              |
| Day 14  | 22DEC2009 | Respiration Rate | 20              | bpm                             | 20.0            | bpm            |                  |                 |
|         |           | SaO2             | 99              | %                               | 99.0            | %              |                  |                 |
|         |           | Pulse Rate       | 66              | bpm                             | 66.0            | bpm            |                  |                 |



Listing 12  
 Vital Signs

| Center  | Patient | Visit       | Assessment Date | Parameter                       | Recorded Result | Recorded Units | Converted Result | Converted Units |
|---------|---------|-------------|-----------------|---------------------------------|-----------------|----------------|------------------|-----------------|
| XVO_007 | 402     | Day 14      | 22DEC2009       | Temperature                     | 36.8            | oC             | 36.8             | oC              |
|         |         |             |                 | Respiration Rate                | 18              | bpm            | 18.0             | bpm             |
|         |         |             |                 | SaO2                            | 98              | %              | 98.0             | %               |
|         |         | Day 30      | 05JAN2010       | Supine Systolic Blood Pressure  | 125             | mmHg           | 125.0            | mmHg            |
|         |         |             |                 | Supine Diastolic Blood Pressure | 89              | mmHg           | 89.0             | mmHg            |
|         |         |             |                 | Pulse Rate                      | 82              | bpm            | 82.0             | bpm             |
|         |         |             |                 | Temperature                     | 36.4            | oC             | 36.4             | oC              |
|         |         |             |                 | Respiration Rate                | 20              | bpm            | 20.0             | bpm             |
|         |         |             |                 | SaO2                            | 100             | %              | 100.0            | %               |
|         |         | Day 42      | 19JAN2010       | Supine Systolic Blood Pressure  | 125             | mmHg           | 125.0            | mmHg            |
|         |         |             |                 | Supine Diastolic Blood Pressure | 86              | mmHg           | 86.0             | mmHg            |
|         |         |             |                 | Pulse Rate                      | 70              | bpm            | 70.0             | bpm             |
|         |         |             |                 | Temperature                     | 36.5            | oC             | 36.5             | oC              |
|         |         |             |                 | Respiration Rate                | 20              | bpm            | 20.0             | bpm             |
|         |         |             |                 | SaO2                            | 98              | %              | 98.0             | %               |
|         |         | Body Weight | 78.4            | kg                              | 78.4            | kg             |                  |                 |

Listing 13  
 Electrocardiogram

| Center  | Patient        | Visit          | Date Performed | Was Aquired Per Protocol | Interpretation [a]               | Clinically Significant Abnormalities                   |
|---------|----------------|----------------|----------------|--------------------------|----------------------------------|--------------------------------------------------------|
| XVO_001 | 101            | Screening      | 09NOV2009      |                          | Normal/within limits             |                                                        |
|         |                | Day 0 Pre-dose |                | Yes                      |                                  |                                                        |
|         |                | 5 Minutes      |                | Yes                      |                                  |                                                        |
|         |                | Day 1          |                | Yes                      |                                  |                                                        |
|         |                | Day 6          |                | Yes                      |                                  |                                                        |
|         | Day 14         | Yes            |                |                          |                                  |                                                        |
|         | 102            | Screening      | 11DEC2009      |                          | Abnormal, clinically significant | INFERIOR WALL MYOCARDIAL INFARCTION ; AGE UNDETERMINED |
|         |                | Day 0 Pre-dose |                | Yes                      |                                  |                                                        |
|         |                | 5 Minutes      |                | Yes                      |                                  |                                                        |
|         |                | Day 1          |                | Yes                      |                                  |                                                        |
|         |                | Day 6          |                | Yes                      |                                  |                                                        |
|         | Day 14         | Yes            |                |                          |                                  |                                                        |
| 103     | Screening      | 11JAN2010      |                | Normal/within limits     |                                  |                                                        |
|         | Day 0 Pre-dose |                | Yes            |                          |                                  |                                                        |
|         | 5 Minutes      |                | Yes            |                          |                                  |                                                        |
|         | Day 1          |                | Yes            |                          |                                  |                                                        |
|         | Day 6          |                | Yes            |                          |                                  |                                                        |
| Day 14  | Yes            |                |                |                          |                                  |                                                        |
| XVO_003 | 201            | Screening      | 10NOV2009      |                          | Normal/within limits             |                                                        |
|         |                | Day 0 Pre-dose |                | Yes                      |                                  |                                                        |
|         |                | 5 Minutes      |                | Yes                      |                                  |                                                        |
|         |                | Day 1          |                | Yes                      |                                  |                                                        |
|         |                | Day 6          |                | Yes                      |                                  |                                                        |
| Day 14  | Yes            |                |                |                          |                                  |                                                        |

Note: [a] Interpretation is only recorded at screening.

Listing 13  
 Electrocardiogram

| Center  | Patient | Visit          | Date Performed | Was Acquired Per Protocol | Interpretation [a]                   | Clinically Significant Abnormalities |
|---------|---------|----------------|----------------|---------------------------|--------------------------------------|--------------------------------------|
| XVO_005 | 301     | Screening      | 03AUG2009      |                           | Abnormal, not clinically significant |                                      |
|         |         | Day 0 Pre-dose |                | Yes                       |                                      |                                      |
|         |         | 5 Minutes      |                | Yes                       |                                      |                                      |
|         |         | Day 1          |                | Yes                       |                                      |                                      |
|         |         | Day 6          |                | Yes                       |                                      |                                      |
| Day 14  | Yes     |                |                |                           |                                      |                                      |
|         | 302     | Screening      | 14DEC2009      |                           | Abnormal, not clinically significant |                                      |
|         |         | Day 0 Pre-dose |                | Yes                       |                                      |                                      |
|         |         | 5 Minutes      |                | Yes                       |                                      |                                      |
|         |         | Day 1          |                | Yes                       |                                      |                                      |
|         |         | Day 6          |                | Yes                       |                                      |                                      |
| Day 14  | Yes     |                |                |                           |                                      |                                      |
| XVO_007 | 401     | Screening      | 04NOV2009      |                           | Normal/within limits                 |                                      |
|         |         | Day 0 Pre-dose |                | Yes                       |                                      |                                      |
|         |         | 5 Minutes      |                | Yes                       |                                      |                                      |
|         |         | Day 1          |                | Yes                       |                                      |                                      |
|         |         | Day 6          |                | Yes                       |                                      |                                      |
| Day 14  | Yes     |                |                |                           |                                      |                                      |
|         | 402     | Screening      | 03DEC2009      |                           | Abnormal, not clinically significant |                                      |
|         |         | Day 0 Pre-dose |                | Yes                       |                                      |                                      |
|         |         | 5 Minutes      |                | Yes                       |                                      |                                      |
|         |         | Day 1          |                | Yes                       |                                      |                                      |
|         |         | Day 6          |                | Yes                       |                                      |                                      |
| Day 14  | Yes     |                |                |                           |                                      |                                      |

Note: [a] Interpretation is only recorded at screening.

Listing 14  
 ECOG Performance Status

| Center  | Patient | Visit     | Assessment Date | ECOG Performance Status |
|---------|---------|-----------|-----------------|-------------------------|
| XVO_001 | 101     | Screening | 09NOV2009       | 0                       |
|         |         | Day 14    |                 | 0                       |
|         |         | Day 30    |                 | 0                       |
|         |         | Day 42    |                 | 1                       |
|         | 102     | Day 0     |                 | 1                       |
|         |         | Day 14    |                 | 1                       |
|         |         | Day 30    |                 | 0                       |
|         |         | Day 42    |                 | 0                       |
|         | 103     | Screening | 12JAN2010       | 0                       |
|         |         | Day 0     |                 | 0                       |
|         |         | Day 14    |                 | 0                       |
|         |         | Day 30    |                 | 0                       |
| Day 42  |         | 0         |                 |                         |
| XVO_003 | 201     | Screening | 10NOV2009       | 1                       |
|         |         | Day 0     |                 | 1                       |
|         |         | Day 14    |                 | 1                       |
|         |         | Day 30    |                 | 1                       |
|         |         | Day 42    |                 | 1                       |
| XVO_005 | 301     | Screening | 03AUG2009       | 1                       |
|         |         | Day 0     |                 | 1                       |
|         |         | Day 14    |                 | 1                       |
|         |         | Day 30    |                 | 1                       |
|         |         | Day 42    |                 | 1                       |

Listing 14  
ECOG Performance Status

---

| Center  | Patient | Visit     | Assessment Date | ECOG Performance Status |
|---------|---------|-----------|-----------------|-------------------------|
| XVO_005 | 302     | Screening | 14DEC2009       | 1                       |
|         |         | Day 0     |                 | 1                       |
|         |         | Day 14    |                 | 1                       |
|         |         | Day 30    |                 | 1                       |
|         |         | Day 42    |                 | 1                       |
| XVO_007 | 401     | Screening | 10NOV2009       | 0                       |
|         |         | Day 0     |                 | 0                       |
|         |         | Day 14    |                 | 0                       |
|         |         | Day 30    |                 | 0                       |
|         |         | Day 42    |                 | 0                       |
|         | 402     | Screening | 03DEC2009       | 0                       |
|         |         | Day 0     |                 | 0                       |
|         |         | Day 14    |                 | 0                       |
|         |         | Day 30    |                 | 0                       |
|         |         | Day 42    |                 | 0                       |

---

Listing 15  
Pregnancy Test Results

| Center  | Patient | Visit  | Date of Test | Result |
|---------|---------|--------|--------------|--------|
| XVO_001 | 101     | Day 0  |              | N/A    |
|         |         | Day 42 |              | N/A    |
|         | 102     | Day 0  |              | N/A    |
|         |         | Day 42 |              | N/A    |
|         | 103     | Day 0  |              | N/A    |
|         |         | Day 42 |              | N/A    |
| XVO_003 | 201     | Day 0  |              | N/A    |
|         |         | Day 42 |              | N/A    |
| XVO_005 | 301     | Day 0  |              | N/A    |
|         |         | Day 42 |              | N/A    |
|         | 302     | Day 0  |              | N/A    |
|         |         | Day 42 |              | N/A    |
| XVO_007 | 401     | Day 0  |              | N/A    |
|         |         | Day 42 |              | N/A    |
|         | 402     | Day 0  |              | N/A    |
|         |         | Day 42 |              | N/A    |

Listing 16  
 Physical Examination

| Center          | Patient      | Visit          | Date Performed | Body System        | Result       | Specify            |              |  |
|-----------------|--------------|----------------|----------------|--------------------|--------------|--------------------|--------------|--|
| XVO_001         | 101          | Screening      | 09NOV2009      | General Appearance | Normal       |                    |              |  |
|                 |              |                |                | EENT               | Normal       |                    |              |  |
|                 |              |                |                | Head and Neck      | Normal       |                    |              |  |
|                 |              |                |                | Heart              | Normal       |                    |              |  |
|                 |              |                |                | Lungs              | Normal       |                    |              |  |
|                 |              |                |                | Abdomen            | Normal       |                    |              |  |
|                 |              |                |                | Genitourinary      | Not Examined |                    |              |  |
|                 |              |                |                | Musculoskeletal    | Normal       |                    |              |  |
|                 |              |                |                | Neurological       | Normal       |                    |              |  |
|                 |              | Dermatological | Normal         |                    |              |                    |              |  |
|                 |              | Day 6          |                |                    |              | General Appearance | Normal       |  |
|                 |              |                |                |                    |              | EENT               | Normal       |  |
|                 |              |                |                |                    |              | Head and Neck      | Normal       |  |
|                 |              |                |                |                    |              | Heart              | Normal       |  |
|                 |              |                |                |                    |              | Lungs              | Normal       |  |
|                 |              |                |                |                    |              | Abdomen            | Normal       |  |
|                 |              |                |                |                    |              | Genitourinary      | Not Examined |  |
|                 |              |                |                |                    |              | Musculoskeletal    | Normal       |  |
|                 |              |                |                |                    |              | Neurological       | Normal       |  |
|                 |              | Dermatological | Normal         |                    |              |                    |              |  |
|                 |              | Day 14         |                |                    |              | General Appearance | Normal       |  |
|                 |              |                |                |                    |              | EENT               | Normal       |  |
|                 |              |                |                |                    |              | Head and Neck      | Normal       |  |
|                 |              |                |                |                    |              | Heart              | Normal       |  |
| Lungs           | Normal       |                |                |                    |              |                    |              |  |
| Abdomen         | Normal       |                |                |                    |              |                    |              |  |
| Genitourinary   | Not Examined |                |                |                    |              |                    |              |  |
| Musculoskeletal | Normal       |                |                |                    |              |                    |              |  |
| Neurological    | Normal       |                |                |                    |              |                    |              |  |
| Dermatological  | Normal       |                |                |                    |              |                    |              |  |

Listing 16  
 Physical Examination

| Center         | Patient         | Visit        | Date Performed     | Body System        | Result                                                                 | Specify |                    |        |  |
|----------------|-----------------|--------------|--------------------|--------------------|------------------------------------------------------------------------|---------|--------------------|--------|--|
| XVO_001        | 101             | Day 30       |                    | General Appearance | Normal                                                                 |         |                    |        |  |
|                |                 |              |                    | EENT               | Normal                                                                 |         |                    |        |  |
|                |                 |              |                    | Head and Neck      | Normal                                                                 |         |                    |        |  |
|                |                 |              |                    | Heart              | Normal                                                                 |         |                    |        |  |
|                |                 |              |                    | Lungs              | Normal                                                                 |         |                    |        |  |
|                |                 |              |                    | Abdomen            | Normal                                                                 |         |                    |        |  |
|                |                 |              |                    | Genitourinary      | Not Examined                                                           |         |                    |        |  |
|                |                 |              |                    | Musculoskeletal    | Normal                                                                 |         |                    |        |  |
|                |                 |              |                    | Neurological       | Normal                                                                 |         |                    |        |  |
|                |                 |              |                    | Dermatological     | Normal                                                                 |         |                    |        |  |
|                |                 |              |                    | Day 42             |                                                                        |         | General Appearance | Normal |  |
|                |                 |              |                    |                    |                                                                        |         | EENT               | Normal |  |
|                | Head and Neck   | Normal       |                    |                    |                                                                        |         |                    |        |  |
|                | Heart           | Normal       |                    |                    |                                                                        |         |                    |        |  |
|                | Lungs           | Normal       |                    |                    |                                                                        |         |                    |        |  |
|                | Abdomen         | Normal       |                    |                    |                                                                        |         |                    |        |  |
|                | Genitourinary   | Not Examined |                    |                    |                                                                        |         |                    |        |  |
|                | Musculoskeletal | Normal       |                    |                    |                                                                        |         |                    |        |  |
| Neurological   | Normal          |              |                    |                    |                                                                        |         |                    |        |  |
| Dermatological | Normal          |              |                    |                    |                                                                        |         |                    |        |  |
| 102            | Screening       | 11DEC2009    | General Appearance | Normal             |                                                                        |         |                    |        |  |
|                |                 |              | EENT               | Normal             |                                                                        |         |                    |        |  |
|                |                 |              | Head and Neck      | Normal             |                                                                        |         |                    |        |  |
|                |                 |              | Heart              | Normal             |                                                                        |         |                    |        |  |
|                |                 |              | Lungs              | Normal             |                                                                        |         |                    |        |  |
|                |                 |              | Abdomen            | Normal             |                                                                        |         |                    |        |  |
|                |                 |              | Genitourinary      | Not Examined       |                                                                        |         |                    |        |  |
|                |                 |              | Musculoskeletal    | Normal             |                                                                        |         |                    |        |  |
|                |                 |              | Neurological       | Normal             |                                                                        |         |                    |        |  |
|                |                 |              | Dermatological     | Abnormal           | MILD ACNEIFORM RASH 5% CONFLUENCE ANTERIORLY AND POSTERIORLY AT THORAX |         |                    |        |  |



Listing 16  
 Physical Examination

| Center          | Patient      | Visit          | Date Performed | Body System                                                                                                             | Result             | Specify      |  |
|-----------------|--------------|----------------|----------------|-------------------------------------------------------------------------------------------------------------------------|--------------------|--------------|--|
| XVO_001         | 102          | Day 6          |                | General Appearance                                                                                                      | Normal             |              |  |
|                 |              |                |                | EENT                                                                                                                    | Normal             |              |  |
|                 |              |                |                | Head and Neck                                                                                                           | Normal             |              |  |
|                 |              |                |                | Heart                                                                                                                   | Normal             |              |  |
|                 |              |                |                | Lungs                                                                                                                   | Normal             |              |  |
|                 |              |                |                | Abdomen                                                                                                                 | Normal             |              |  |
|                 |              |                |                | Genitourinary                                                                                                           | Not Examined       |              |  |
|                 |              |                |                | Musculoskeletal                                                                                                         | Normal             |              |  |
|                 |              |                |                | Neurological                                                                                                            | Normal             |              |  |
|                 |              | Dermatological | Abnormal       | RESOLVED ACNEIFORM RASH AT THORAX                                                                                       |                    |              |  |
|                 |              | Day 14         |                |                                                                                                                         | General Appearance | Normal       |  |
|                 |              |                |                |                                                                                                                         | EENT               | Normal       |  |
|                 |              |                |                |                                                                                                                         | Head and Neck      | Normal       |  |
|                 |              |                |                |                                                                                                                         | Heart              | Normal       |  |
|                 |              |                |                |                                                                                                                         | Lungs              | Normal       |  |
|                 |              |                |                |                                                                                                                         | Abdomen            | Normal       |  |
|                 |              |                |                |                                                                                                                         | Genitourinary      | Not Examined |  |
|                 |              |                |                |                                                                                                                         | Musculoskeletal    | Normal       |  |
|                 |              |                |                |                                                                                                                         | Neurological       | Normal       |  |
|                 |              | Dermatological | Abnormal       | INTEGUMENTARY: HYPERPIGMENTATION SECONDARY TO RESOLVED ACNEIFORM AND CETUXIMAB INDUCED RASH PARONYCHIA ON LEFT BIG TOES |                    |              |  |
|                 |              | Day 30         |                |                                                                                                                         | General Appearance | Normal       |  |
| EENT            | Normal       |                |                |                                                                                                                         |                    |              |  |
| Head and Neck   | Normal       |                |                |                                                                                                                         |                    |              |  |
| Heart           | Normal       |                |                |                                                                                                                         |                    |              |  |
| Lungs           | Normal       |                |                |                                                                                                                         |                    |              |  |
| Abdomen         | Normal       |                |                |                                                                                                                         |                    |              |  |
| Genitourinary   | Not Examined |                |                |                                                                                                                         |                    |              |  |
| Musculoskeletal | Normal       |                |                |                                                                                                                         |                    |              |  |
| Neurological    | Normal       |                |                |                                                                                                                         |                    |              |  |

Listing 16  
 Physical Examination

| Center  | Patient   | Visit          | Date Performed     | Body System        | Result                               | Specify                              |
|---------|-----------|----------------|--------------------|--------------------|--------------------------------------|--------------------------------------|
| XVO_001 | 102       | Day 30         |                    | Dermatological     | Abnormal                             | PARONYCHIA ON LEFT BIG TOE RESOLVING |
|         |           | Day 42         |                    | General Appearance | Normal                               |                                      |
|         |           |                | EENT               | Normal             |                                      |                                      |
|         |           |                | Head and Neck      | Normal             |                                      |                                      |
|         |           |                | Heart              | Normal             |                                      |                                      |
|         |           |                | Lungs              | Normal             |                                      |                                      |
|         |           |                | Abdomen            | Normal             |                                      |                                      |
|         |           |                | Genitourinary      | Not Examined       |                                      |                                      |
|         |           |                | Musculoskeletal    | Normal             |                                      |                                      |
|         |           |                | Neurological       | Normal             |                                      |                                      |
|         |           | Dermatological | Abnormal           |                    | PARONYCHIA ON LEFT BIG TOE RESOLVING |                                      |
| 103     | Screening | 12JAN2010      | General Appearance | Normal             |                                      |                                      |
|         |           |                | EENT               | Normal             |                                      |                                      |
|         |           |                | Head and Neck      | Normal             |                                      |                                      |
|         |           |                |                    | Heart              | Normal                               |                                      |
|         |           |                |                    | Lungs              | Normal                               |                                      |
|         |           |                |                    | Abdomen            | Normal                               |                                      |
|         |           |                |                    | Genitourinary      | Not Examined                         |                                      |
|         |           |                |                    | Musculoskeletal    | Normal                               |                                      |
|         |           |                |                    | Neurological       | Normal                               |                                      |
|         |           |                |                    | Dermatological     | Normal                               |                                      |
|         | Day 6     |                | General Appearance | Normal             |                                      |                                      |
|         |           |                | EENT               | Normal             |                                      |                                      |
|         |           |                | Head and Neck      | Normal             |                                      |                                      |
|         |           |                | Heart              | Normal             |                                      |                                      |
|         |           |                | Lungs              | Normal             |                                      |                                      |
|         |           |                | Abdomen            | Normal             |                                      |                                      |
|         |           |                | Genitourinary      | Not Examined       |                                      |                                      |
|         |           |                | Musculoskeletal    | Normal             |                                      |                                      |
|         |           |                | Neurological       | Normal             |                                      |                                      |
|         |           |                | Dermatological     | Normal             |                                      |                                      |

Listing 16  
 Physical Examination

| Center          | Patient | Visit          | Date Performed | Body System        | Result             | Specify      |  |
|-----------------|---------|----------------|----------------|--------------------|--------------------|--------------|--|
| XVO_001         | 103     | Day 14         |                | General Appearance | Normal             |              |  |
|                 |         |                |                | EENT               | Normal             |              |  |
|                 |         |                |                | Head and Neck      | Normal             |              |  |
|                 |         |                |                | Heart              | Normal             |              |  |
|                 |         |                |                | Lungs              | Normal             |              |  |
|                 |         |                |                | Abdomen            | Normal             |              |  |
|                 |         |                |                | Genitourinary      | Not Examined       |              |  |
|                 |         |                |                | Musculoskeletal    | Normal             |              |  |
|                 |         |                |                | Neurological       | Normal             |              |  |
|                 |         | Dermatological | Normal         |                    |                    |              |  |
|                 |         | Day 30         |                |                    | General Appearance | Normal       |  |
|                 |         |                |                |                    | EENT               | Normal       |  |
|                 |         |                |                |                    | Head and Neck      | Normal       |  |
|                 |         |                |                |                    | Heart              | Normal       |  |
|                 |         |                |                |                    | Lungs              | Normal       |  |
|                 |         |                |                |                    | Abdomen            | Normal       |  |
|                 |         |                |                |                    | Genitourinary      | Not Examined |  |
|                 |         |                |                |                    | Musculoskeletal    | Normal       |  |
|                 |         |                |                |                    | Neurological       | Normal       |  |
|                 |         | Dermatological | Normal         |                    |                    |              |  |
|                 |         | Day 42         |                |                    | General Appearance | Normal       |  |
|                 |         |                |                |                    | EENT               | Normal       |  |
|                 |         |                |                |                    | Head and Neck      | Normal       |  |
|                 |         |                |                |                    | Heart              | Normal       |  |
|                 |         |                |                |                    | Lungs              | Normal       |  |
|                 |         |                |                |                    | Abdomen            | Normal       |  |
|                 |         |                |                |                    | Genitourinary      | Not Examined |  |
| Musculoskeletal | Normal  |                |                |                    |                    |              |  |
| Neurological    | Normal  |                |                |                    |                    |              |  |
| Dermatological  | Normal  |                |                |                    |                    |              |  |
| XVO_003         | 201     | Screening      | 10NOV2009      | General Appearance | Normal             |              |  |

Listing 16  
 Physical Examination

| Center        | Patient  | Visit          | Date Performed | Body System                                                                      | Result       | Specify            |                                                                                                                                             |                                                                |
|---------------|----------|----------------|----------------|----------------------------------------------------------------------------------|--------------|--------------------|---------------------------------------------------------------------------------------------------------------------------------------------|----------------------------------------------------------------|
| XVO_003       | 201      | Screening      | 10NOV2009      | EENT                                                                             | Abnormal     | MAXILLARY DENTURES |                                                                                                                                             |                                                                |
|               |          |                |                | Head and Neck                                                                    | Normal       |                    |                                                                                                                                             |                                                                |
|               |          |                |                | Heart                                                                            | Normal       |                    |                                                                                                                                             |                                                                |
|               |          |                |                | Lungs                                                                            | Normal       |                    |                                                                                                                                             |                                                                |
|               |          |                |                | Abdomen                                                                          | Normal       |                    |                                                                                                                                             |                                                                |
|               |          |                |                | Genitourinary                                                                    | Not Examined |                    |                                                                                                                                             |                                                                |
|               |          |                |                | Musculoskeletal                                                                  | Normal       |                    |                                                                                                                                             |                                                                |
|               |          |                |                | Neurological                                                                     | Normal       |                    |                                                                                                                                             |                                                                |
|               |          |                |                | Dermatological                                                                   | Abnormal     |                    | -PURPURIC LESIONS OF BILATERAL ELBOWS - LEFT UPPER QUADRANT ABDOMEN - POST-SURGICAL SCAR - RIGHT POSTEROLATERAL THORAX - POST-SURGICAL SCAR |                                                                |
|               |          | Day 0          |                |                                                                                  |              | General Appearance | Normal                                                                                                                                      | MAXILLARY DENTURES                                             |
|               |          |                |                |                                                                                  |              | EENT               | Abnormal                                                                                                                                    |                                                                |
|               |          |                |                |                                                                                  |              | Head and Neck      | Normal                                                                                                                                      |                                                                |
|               |          |                |                |                                                                                  |              | Heart              | Normal                                                                                                                                      |                                                                |
|               |          |                |                |                                                                                  |              | Lungs              | Normal                                                                                                                                      |                                                                |
|               |          |                |                |                                                                                  |              | Abdomen            | Normal                                                                                                                                      |                                                                |
|               |          |                |                |                                                                                  |              | Genitourinary      | Normal                                                                                                                                      |                                                                |
|               |          |                |                |                                                                                  |              | Musculoskeletal    | Normal                                                                                                                                      |                                                                |
|               |          |                |                |                                                                                  |              | Neurological       | Normal                                                                                                                                      |                                                                |
|               |          | Dermatological | Abnormal       | -PURPURIC LESIONS -BILATERAL ELBOWS -POST SURGICAL CHANGES ON ABDOMEN AND THORAX |              |                    |                                                                                                                                             |                                                                |
|               |          | Day 6          |                |                                                                                  |              | General Appearance | Normal                                                                                                                                      | MAXILLARY DENTURES<br>MILD BILATERAL SALIVARY GLAND TENDERNESS |
|               |          |                |                |                                                                                  |              | EENT               | Abnormal                                                                                                                                    |                                                                |
| Head and Neck | Abnormal |                |                |                                                                                  |              |                    |                                                                                                                                             |                                                                |
| Heart         | Normal   |                |                |                                                                                  |              |                    |                                                                                                                                             |                                                                |
| Lungs         | Normal   |                |                |                                                                                  |              |                    |                                                                                                                                             |                                                                |
| Abdomen       | Normal   |                |                |                                                                                  |              |                    |                                                                                                                                             |                                                                |

Listing 16  
 Physical Examination

| Center  | Patient         | Visit    | Date Performed                                                                                                                                                                                 | Body System     | Result                                        | Specify                                                                                                                                                                    |  |
|---------|-----------------|----------|------------------------------------------------------------------------------------------------------------------------------------------------------------------------------------------------|-----------------|-----------------------------------------------|----------------------------------------------------------------------------------------------------------------------------------------------------------------------------|--|
| XVO_003 | 201             | Day 6    |                                                                                                                                                                                                | Genitourinary   | Normal                                        |                                                                                                                                                                            |  |
|         |                 |          |                                                                                                                                                                                                | Musculoskeletal | Normal                                        |                                                                                                                                                                            |  |
|         |                 |          |                                                                                                                                                                                                | Neurological    | Normal                                        |                                                                                                                                                                            |  |
|         |                 |          |                                                                                                                                                                                                | Dermatological  | Abnormal                                      | -PURPURIC LESIONS OF BILATERAL ELBOWS -LEFT ELBOW WITH HEALING SORE WITH OVERLYING BANDAGE-NO INDURATION/EDEMA/MILD ERYTHEMA -HEALED POST-SURGICAL SCARS ON ABDOMEN/THORAX |  |
|         |                 |          | Day 14                                                                                                                                                                                         |                 | General Appearance                            | Normal                                                                                                                                                                     |  |
|         |                 |          | EENT                                                                                                                                                                                           | Abnormal        | MAXILLARY DENTURES                            |                                                                                                                                                                            |  |
|         |                 |          | Head and Neck                                                                                                                                                                                  | Abnormal        | MILD BILATERAL SUBMANDIBULAR GLAND TENDERNESS |                                                                                                                                                                            |  |
|         |                 |          | Heart                                                                                                                                                                                          | Normal          |                                               |                                                                                                                                                                            |  |
|         |                 |          | Lungs                                                                                                                                                                                          | Normal          |                                               |                                                                                                                                                                            |  |
|         |                 |          | Abdomen                                                                                                                                                                                        | Normal          |                                               |                                                                                                                                                                            |  |
|         |                 |          | Genitourinary                                                                                                                                                                                  | Normal          |                                               |                                                                                                                                                                            |  |
|         |                 |          | Musculoskeletal                                                                                                                                                                                | Normal          |                                               |                                                                                                                                                                            |  |
|         | Neurological    | Normal   |                                                                                                                                                                                                |                 |                                               |                                                                                                                                                                            |  |
|         | Dermatological  | Abnormal | -LEFT ELBOW SORE HEALED -NEW RIGHT ELBOW SORE WITH OVERLYING BANDAGE -NO INDURATION/EDEMA BUT MILD ERYTHEMA -BILATERAL ELBOW PURPURIC LESIONS -HEALED POSTSURGICAL SCARS ON ABDOMEN AND THORAX |                 |                                               |                                                                                                                                                                            |  |
|         | Day 30          |          | General Appearance                                                                                                                                                                             | Normal          |                                               |                                                                                                                                                                            |  |
|         | EENT            | Abnormal | MAXILLARY DENTURES                                                                                                                                                                             |                 |                                               |                                                                                                                                                                            |  |
|         | Head and Neck   | Normal   |                                                                                                                                                                                                |                 |                                               |                                                                                                                                                                            |  |
|         | Heart           | Normal   |                                                                                                                                                                                                |                 |                                               |                                                                                                                                                                            |  |
|         | Lungs           | Normal   |                                                                                                                                                                                                |                 |                                               |                                                                                                                                                                            |  |
|         | Abdomen         | Normal   |                                                                                                                                                                                                |                 |                                               |                                                                                                                                                                            |  |
|         | Genitourinary   | Normal   |                                                                                                                                                                                                |                 |                                               |                                                                                                                                                                            |  |
|         | Musculoskeletal | Normal   |                                                                                                                                                                                                |                 |                                               |                                                                                                                                                                            |  |

Listing 16  
 Physical Examination

| Center         | Patient            | Visit                                                                                     | Date Performed | Body System        | Result             | Specify |                                                                                                                              |
|----------------|--------------------|-------------------------------------------------------------------------------------------|----------------|--------------------|--------------------|---------|------------------------------------------------------------------------------------------------------------------------------|
| XVO_003        | 201                | Day 30                                                                                    |                | Neurological       | Normal             |         |                                                                                                                              |
|                |                    |                                                                                           |                | Dermatological     | Abnormal           |         | -LEFT AND RIGHT ELBOW SORES HEALED -SMALL BILATERAL ELBOW PURPURIC LESIONS -HEALED POST-SURGICAL SCARS ON ABDOMEN AND THORAX |
|                |                    | Day 42                                                                                    |                | General Appearance | Normal             |         |                                                                                                                              |
|                |                    | EENT                                                                                      |                | Abnormal           | MAXILLARY DENTURES |         |                                                                                                                              |
|                |                    | Head and Neck                                                                             |                | Normal             |                    |         |                                                                                                                              |
|                |                    | Heart                                                                                     |                | Normal             |                    |         |                                                                                                                              |
|                |                    | Lungs                                                                                     |                | Normal             |                    |         |                                                                                                                              |
|                |                    | Abdomen                                                                                   |                | Normal             |                    |         |                                                                                                                              |
|                |                    | Genitourinary                                                                             |                | Normal             |                    |         |                                                                                                                              |
|                |                    | Musculoskeletal                                                                           |                | Normal             |                    |         |                                                                                                                              |
| Neurological   | Normal             |                                                                                           |                |                    |                    |         |                                                                                                                              |
| Dermatological | Abnormal           | -SMALL BILATERAL ELBOW PURPURIC LESIONS, -HEALED POST-SURGICAL SCAR ON ABDOMEN AND THORAX |                |                    |                    |         |                                                                                                                              |
| XVO_005        | 301                | Screening                                                                                 | 03AUG2009      | General Appearance | Normal             |         |                                                                                                                              |
|                |                    |                                                                                           |                | EENT               | Normal             |         |                                                                                                                              |
|                |                    |                                                                                           |                | Head and Neck      | Normal             |         |                                                                                                                              |
|                |                    |                                                                                           |                | Heart              | Normal             |         |                                                                                                                              |
|                |                    |                                                                                           |                | Lungs              | Abnormal           |         | DECREASED BREATH SOUNDS LEFT LUNG BASE RELATED TO PRIOR SURGERY                                                              |
|                |                    |                                                                                           |                | Abdomen            | Abnormal           |         | PALPIABLE HERNIAS                                                                                                            |
|                |                    |                                                                                           |                | Genitourinary      | Not Examined       |         |                                                                                                                              |
|                |                    |                                                                                           |                | Musculoskeletal    | Normal             |         |                                                                                                                              |
|                |                    |                                                                                           |                | Neurological       | Normal             |         |                                                                                                                              |
|                |                    |                                                                                           |                | Dermatological     | Abnormal           |         | LOVENOX INJECTION SITE BRUISING TO DERMATOLOGICAL, ABDOMINAL MIDLINE SCAR, UPPER LEFT AND RIGHT THORACIC SCARS               |
| Day 6          | General Appearance | Normal                                                                                    |                |                    |                    |         |                                                                                                                              |

Listing 16  
 Physical Examination

| Center  | Patient | Visit  | Date Performed     | Body System   | Result                                                                                            | Specify                                                                                |                                                                                                |
|---------|---------|--------|--------------------|---------------|---------------------------------------------------------------------------------------------------|----------------------------------------------------------------------------------------|------------------------------------------------------------------------------------------------|
| XVO_005 | 301     | Day 6  |                    | EENT          | Normal                                                                                            | DECREASED BREATH SOUNDS LEFT LUNG BASE<br>RELATED TO PRIOR SURGERY<br>PALPABLE HERNIAS |                                                                                                |
|         |         |        |                    | Head and Neck | Normal                                                                                            |                                                                                        |                                                                                                |
|         |         |        |                    | Heart         | Normal                                                                                            |                                                                                        |                                                                                                |
|         |         |        |                    | Lungs         | Abnormal                                                                                          |                                                                                        |                                                                                                |
|         |         |        |                    | Abdomen       | Abnormal                                                                                          |                                                                                        |                                                                                                |
|         |         |        |                    | Genitourinary | Not Examined                                                                                      |                                                                                        |                                                                                                |
|         |         | Day 14 |                    |               | Musculoskeletal                                                                                   | Normal                                                                                 | MIDLINE ABNORMAL SCAR, LOVENOX INJECTION SITE<br>BRUISING, UPPER THORACIC LEFT AND RIGHT SCARS |
|         |         |        |                    |               | Neurological                                                                                      | Normal                                                                                 |                                                                                                |
|         |         |        |                    |               | Dermatological                                                                                    | Abnormal                                                                               |                                                                                                |
|         |         |        |                    |               | General Appearance                                                                                | Normal                                                                                 |                                                                                                |
|         |         |        |                    |               | EENT                                                                                              | Normal                                                                                 |                                                                                                |
|         |         |        |                    |               | Head and Neck                                                                                     | Normal                                                                                 |                                                                                                |
|         |         | Day 30 |                    |               | Heart                                                                                             | Normal                                                                                 | DECREASED BREATH SOUNDS LEFT LUNG BASE<br>RELATED TO PRIOR SURGERY<br>PALPABLE HERNIAS         |
|         |         |        |                    |               | Lungs                                                                                             | Abnormal                                                                               |                                                                                                |
|         |         |        |                    |               | Abdomen                                                                                           | Abnormal                                                                               |                                                                                                |
|         |         |        |                    |               | Genitourinary                                                                                     | Not Examined                                                                           |                                                                                                |
|         |         |        |                    |               | Musculoskeletal                                                                                   | Normal                                                                                 |                                                                                                |
|         |         |        |                    |               | Neurological                                                                                      | Normal                                                                                 |                                                                                                |
| Day 30  |         |        | Dermatological     | Abnormal      | LOVENOX INJECTION SITE BRUISING MIDLINE<br>ABDOMINAL SCAR, UPPER THORACIC LEFT AND RIGHT<br>SCARS |                                                                                        |                                                                                                |
|         |         |        | General Appearance | Normal        |                                                                                                   |                                                                                        |                                                                                                |
|         |         |        | EENT               | Normal        |                                                                                                   |                                                                                        |                                                                                                |
|         |         |        | Head and Neck      | Normal        |                                                                                                   |                                                                                        |                                                                                                |
|         |         |        | Heart              | Normal        |                                                                                                   |                                                                                        |                                                                                                |
|         |         |        | Lungs              | Abnormal      |                                                                                                   |                                                                                        |                                                                                                |
| Day 30  |         |        | Abdomen            | Abnormal      | DECREASED BREATH SOUNDS LEFT LUNG BASE<br>PALPABLE HERNIAS                                        |                                                                                        |                                                                                                |

Listing 16  
 Physical Examination

| Center          | Patient            | Visit                                                                                    | Date Performed                                          | Body System        | Result       | Specify                                                                                             |
|-----------------|--------------------|------------------------------------------------------------------------------------------|---------------------------------------------------------|--------------------|--------------|-----------------------------------------------------------------------------------------------------|
| XVO_005         | 301                | Day 30                                                                                   |                                                         | Genitourinary      | Not Examined | LOVENOX INJECTION SITES(BRUIISING) MIDLINE<br>ABDOMINAL SCAR UPPER THORACIC LEFT AND RIGHT<br>SCARS |
|                 |                    |                                                                                          |                                                         | Musculoskeletal    | Normal       |                                                                                                     |
|                 |                    |                                                                                          |                                                         | Neurological       | Normal       |                                                                                                     |
|                 |                    |                                                                                          |                                                         | Dermatological     | Abnormal     |                                                                                                     |
|                 |                    | Day 42                                                                                   |                                                         | General Appearance | Normal       |                                                                                                     |
|                 | EENT               | Normal                                                                                   |                                                         |                    |              |                                                                                                     |
|                 | Head and Neck      | Normal                                                                                   |                                                         |                    |              |                                                                                                     |
|                 | Heart              | Normal                                                                                   |                                                         |                    |              |                                                                                                     |
|                 | Lungs              | Abnormal                                                                                 | DECREASED BREATH SOUNDS LEFT LUNG BASE MILD<br>WHEEZING |                    |              |                                                                                                     |
|                 | Abdomen            | Abnormal                                                                                 | PALPABLE HERNIAS                                        |                    |              |                                                                                                     |
| Genitourinary   | Not Examined       |                                                                                          |                                                         |                    |              |                                                                                                     |
| Musculoskeletal | Normal             |                                                                                          |                                                         |                    |              |                                                                                                     |
| Neurological    | Normal             |                                                                                          |                                                         |                    |              |                                                                                                     |
| Dermatological  | Abnormal           | LOVENOX SITES (BRUIISING) MIDLINE ABDOMINAL<br>SCAR, UPPER THORACIC LEFT AND RIGHT SCARS |                                                         |                    |              |                                                                                                     |
|                 | 302                | Screening                                                                                | 14DEC2009                                               | General Appearance | Normal       |                                                                                                     |
|                 |                    |                                                                                          |                                                         | EENT               | Normal       |                                                                                                     |
|                 |                    |                                                                                          |                                                         | Head and Neck      | Normal       |                                                                                                     |
|                 |                    |                                                                                          |                                                         | Heart              | Normal       |                                                                                                     |
|                 |                    |                                                                                          |                                                         | Lungs              | Normal       |                                                                                                     |
|                 | Abdomen            | Normal                                                                                   |                                                         |                    |              |                                                                                                     |
|                 | Genitourinary      | Not Examined                                                                             |                                                         |                    |              |                                                                                                     |
|                 | Musculoskeletal    | Normal                                                                                   |                                                         |                    |              |                                                                                                     |
|                 | Neurological       | Normal                                                                                   |                                                         |                    |              |                                                                                                     |
|                 | Dermatological     | Normal                                                                                   |                                                         |                    |              |                                                                                                     |
| Day 14          | General Appearance | Normal                                                                                   |                                                         |                    |              |                                                                                                     |
| EENT            | Abnormal           | SMALL STYE BELOW RIGHT EYE                                                               |                                                         |                    |              |                                                                                                     |



Listing 16  
 Physical Examination

| Center        | Patient      | Visit          | Date Performed | Body System        | Result             | Specify      |  |
|---------------|--------------|----------------|----------------|--------------------|--------------------|--------------|--|
| XVO_005       | 302          | Day 14         |                | Head and Neck      | Normal             |              |  |
|               |              |                |                | Heart              | Normal             |              |  |
|               |              |                |                | Lungs              | Normal             |              |  |
|               |              |                |                | Abdomen            | Normal             |              |  |
|               |              |                |                | Genitourinary      | Not Examined       |              |  |
|               |              |                |                | Musculoskeletal    | Normal             |              |  |
|               |              |                |                | Neurological       | Normal             |              |  |
|               |              | Dermatological | Normal         |                    |                    |              |  |
|               |              | Day 30         |                |                    | General Appearance | Normal       |  |
|               |              |                |                |                    | EENT               | Normal       |  |
|               |              |                |                |                    | Head and Neck      | Normal       |  |
|               |              |                |                |                    | Heart              | Normal       |  |
|               |              |                |                |                    | Lungs              | Normal       |  |
|               |              |                |                |                    | Abdomen            | Normal       |  |
|               |              |                |                |                    | Genitourinary      | Not Examined |  |
|               |              | Day 42         |                |                    | General Appearance | Normal       |  |
|               |              |                |                |                    | EENT               | Normal       |  |
|               |              |                |                |                    | Head and Neck      | Normal       |  |
|               |              |                |                |                    | Heart              | Normal       |  |
|               |              |                |                |                    | Lungs              | Normal       |  |
|               |              |                |                |                    | Abdomen            | Normal       |  |
| Genitourinary | Not Examined |                |                |                    |                    |              |  |
| XVO_007       | 401          | Screening      | 10NOV2009      | General Appearance | Normal             |              |  |
|               |              |                |                | EENT               | Normal             |              |  |
|               |              |                |                | Head and Neck      | Normal             |              |  |

Listing 16  
 Physical Examination

| Center  | Patient | Visit              | Date Performed | Body System        | Result       | Specify |
|---------|---------|--------------------|----------------|--------------------|--------------|---------|
| XVO_007 | 401     | Screening          | 10NOV2009      | Heart              | Normal       |         |
|         |         |                    |                | Lungs              | Normal       |         |
|         |         |                    |                | Abdomen            | Normal       |         |
|         |         |                    |                | Genitourinary      | Not Examined |         |
|         |         |                    |                | Musculoskeletal    | Normal       |         |
|         |         |                    |                | Neurological       | Not Examined |         |
|         |         |                    |                | Dermatological     | Normal       |         |
|         |         | Day 0              |                | General Appearance | Normal       |         |
|         |         |                    |                | EENT               | Normal       |         |
|         |         |                    |                | Head and Neck      | Normal       |         |
|         |         |                    |                | Heart              | Normal       |         |
|         |         |                    |                | Lungs              | Normal       |         |
|         |         |                    |                | Abdomen            | Normal       |         |
|         |         |                    |                | Genitourinary      | Not Examined |         |
|         |         |                    |                | Musculoskeletal    | Normal       |         |
|         |         |                    |                | Neurological       | Not Examined |         |
|         |         |                    |                | Dermatological     | Normal       |         |
|         |         | Day 6              |                | General Appearance | Normal       |         |
|         |         |                    |                | EENT               | Normal       |         |
|         |         |                    |                | Head and Neck      | Normal       |         |
|         |         |                    |                | Heart              | Normal       |         |
|         |         | Lungs              | Normal         |                    |              |         |
|         |         | Abdomen            | Normal         |                    |              |         |
|         |         | Genitourinary      | Not Examined   |                    |              |         |
|         |         | Musculoskeletal    | Normal         |                    |              |         |
|         |         | Neurological       | Not Examined   |                    |              |         |
|         |         | Dermatological     | Normal         |                    |              |         |
| Day 14  |         | General Appearance | Normal         |                    |              |         |
|         |         | EENT               | Normal         |                    |              |         |
|         |         | Head and Neck      | Normal         |                    |              |         |
|         |         | Heart              | Normal         |                    |              |         |

Listing 16  
 Physical Examination

| Center  | Patient   | Visit              | Date Performed     | Body System           | Result       | Specify |
|---------|-----------|--------------------|--------------------|-----------------------|--------------|---------|
| XVO_007 | 401       | Day 14             |                    | Lungs                 | Normal       |         |
|         |           |                    |                    | Abdomen               | Normal       |         |
|         |           |                    |                    | Genitourinary         | Not Examined |         |
|         |           |                    |                    | Musculoskeletal       | Normal       |         |
|         |           |                    |                    | Neurological          | Not Examined |         |
|         |           |                    |                    | Dermatological        | Normal       |         |
|         |           | Day 30             |                    | General Appearance    | Normal       |         |
|         |           |                    |                    | EENT                  | Normal       |         |
|         |           |                    |                    | Head and Neck         | Normal       |         |
|         |           |                    |                    | Heart                 | Normal       |         |
|         |           |                    |                    | Lungs                 | Normal       |         |
|         |           |                    |                    | Abdomen               | Normal       |         |
|         | Day 42    | Genitourinary      | Not Examined       |                       |              |         |
|         |           | Musculoskeletal    | Normal             |                       |              |         |
|         |           | Neurological       | Not Examined       |                       |              |         |
|         |           | Dermatological     | Abnormal           | ERYTHEMATOUS ON CHEST |              |         |
|         |           | General Appearance | Normal             |                       |              |         |
|         |           | EENT               | Normal             |                       |              |         |
| 402     | Screening | 03DEC2009          | General Appearance | Normal                |              |         |
|         |           |                    | EENT               | Normal                |              |         |
|         |           |                    | Head and Neck      | Normal                |              |         |
|         |           |                    | Heart              | Normal                |              |         |
|         |           |                    | Lungs              | Normal                |              |         |
|         |           |                    |                    |                       |              |         |

Listing 16  
 Physical Examination

| Center  | Patient | Visit     | Date Performed     | Body System     | Result | Specify |
|---------|---------|-----------|--------------------|-----------------|--------|---------|
| XVO_007 | 402     | Screening | 03DEC2009          | Abdomen         | Normal |         |
|         |         |           |                    | Genitourinary   | Normal |         |
|         |         |           |                    | Musculoskeletal | Normal |         |
|         |         |           |                    | Neurological    | Normal |         |
|         |         |           |                    | Dermatological  | Normal |         |
|         |         | Day 0     | General Appearance | Normal          |        |         |
|         |         |           | EENT               | Normal          |        |         |
|         |         |           | Head and Neck      | Normal          |        |         |
|         |         |           | Heart              | Normal          |        |         |
|         |         |           | Lungs              | Normal          |        |         |
|         |         | Day 6     | Abdomen            | Normal          |        |         |
|         |         |           | Genitourinary      | Normal          |        |         |
|         |         |           | Musculoskeletal    | Normal          |        |         |
|         |         |           | Neurological       | Normal          |        |         |
|         |         |           | Dermatological     | Normal          |        |         |
|         |         | Day 14    | General Appearance | Normal          |        |         |
|         |         |           | EENT               | Normal          |        |         |
|         |         |           | Head and Neck      | Normal          |        |         |
|         |         |           | Heart              | Normal          |        |         |
|         |         |           | Lungs              | Normal          |        |         |
|         |         |           |                    |                 |        | Abdomen |

Listing 16  
 Physical Examination

| Center  | Patient | Visit  | Date Performed     | Body System     | Result             | Specify |  |
|---------|---------|--------|--------------------|-----------------|--------------------|---------|--|
| XVO_007 | 402     | Day 14 |                    | Genitourinary   | Normal             |         |  |
|         |         |        |                    | Musculoskeletal | Normal             |         |  |
|         |         |        |                    | Neurological    | Normal             |         |  |
|         |         |        |                    | Dermatological  | Normal             |         |  |
|         |         | Day 30 |                    |                 | General Appearance | Normal  |  |
|         |         |        |                    |                 | EENT               | Normal  |  |
|         |         |        |                    |                 | Head and Neck      | Normal  |  |
|         |         |        |                    |                 | Heart              | Normal  |  |
|         |         |        |                    |                 | Lungs              | Normal  |  |
|         |         |        |                    |                 | Abdomen            | Normal  |  |
|         |         |        |                    |                 | Genitourinary      | Normal  |  |
|         |         |        |                    |                 | Musculoskeletal    | Normal  |  |
| Day 42  |         |        | Neurological       | Normal          |                    |         |  |
|         |         |        | Dermatological     | Normal          |                    |         |  |
|         |         |        | General Appearance | Normal          |                    |         |  |
|         |         |        | EENT               | Normal          |                    |         |  |
|         |         |        | Head and Neck      | Normal          |                    |         |  |
|         |         |        | Heart              | Normal          |                    |         |  |
|         |         |        | Lungs              | Normal          |                    |         |  |
|         |         |        | Abdomen            | Normal          |                    |         |  |
| Day 42  |         |        | Genitourinary      | Normal          |                    |         |  |
|         |         |        | Musculoskeletal    | Normal          |                    |         |  |
|         |         |        | Neurological       | Normal          |                    |         |  |
|         |         |        | Dermatological     | Normal          |                    |         |  |

Listing 17  
 Camera and Whole Body Imaging (Part I)

| Center    | Patient | Scan        | Camera         |                  | Computer    |                | Camera Type   | Collimator | Same as Initial | Void Prior? | CO-57 Peak |
|-----------|---------|-------------|----------------|------------------|-------------|----------------|---------------|------------|-----------------|-------------|------------|
|           |         |             | Manufacturer   | Model            | Vendor      | Software       |               |            |                 |             |            |
| XVO_001   | 101     | Blank       | SIEMENS        | ECAM SIGNATURE   | DELL        | ESOFT (SYNGO)  | DUAL DETECTOR | HI ENERGY  |                 |             | 122±10%    |
|           |         | Attenuation | SIEMENS        | ECAM SIGNATURE   | DELL        | ESOFT (SYNGO)  | DUAL DETECTOR | HI ENERGY  |                 |             | 122±10%    |
|           |         | 15 Minutes  | SIEMENS        | ECAM SIGNATURE   | DELL        | ESOFT (SYNGO)  | DUAL DETECTOR | HI ENERGY  |                 | NO          |            |
|           |         | 4-6 Hours   | SIEMENS        | ECAM SIGNATURE   | DELL        | ESOFT (SYNGO)  | DUAL DETECTOR | HI ENERGY  | YES             |             |            |
|           |         | Day 1       | SIEMENS        | ECAM (SIGNATURE) | DELL        | E SOFT (SYNGO) | DUAL DETECTOR | HI ENERGY  | YES             |             |            |
|           |         | Day 2       | SIEMANS        | E-CAM SIGNATURE  | DELL        | E-SOFT SYNGO   | DUAL DETECTOR | HI ENERGY  | YES             |             |            |
|           |         | Day 3       | SIEMANS        | ECAM SIGNATURE   | DELL        | ESOFT SYNGO    | DUAL DETECTOR | HI ENERGY  | YES             |             |            |
|           |         | Day 6       | SIEMANS        | ECAM SIGNATURE   | DELL        | ESOFT SYNGO    | DUAL DETECTOR | HI ENERGY  | YES             |             |            |
|           |         | Day 14      | SIEMENS        | ECAM SIGNATURE   | DELL        | E-SOFT SYNGO   | DUAL DETECTOR | HI ENERGY  | YES             |             |            |
|           | 102     | Blank       | SIEMENS        | ECAM SIGNATURE   | DELL        | SYNGO ESOFT    | DUAL DETECTOR | HI ENERGY  |                 |             | 122±10%    |
|           |         | Attenuation | SIEMENS        | ECAM SIGNATURE   | DELL        | SYNGO ESOFT    | DUAL DETECTOR | HI ENERGY  |                 |             | 122±10%    |
|           |         | 15 Minutes  | SIEMENS        | ECAM SIGNATURE   | DELL        | SYNGO ESOFT    | DUAL DETECTOR | HI ENERGY  |                 | NO          |            |
|           |         | 4-6 Hours   | SIEMANS        | ECAM SIGNATURE   | DELL        | ESOFT (SYNGO)  | DUAL DETECTOR | HI ENERGY  | YES             |             |            |
|           |         | Day 1       | SIEMENS        | ECAM SIGNATURE   | DELL        | ESOFT (SYNGO)  | DUAL DETECTOR | HI ENERGY  | YES             |             |            |
|           |         | Day 2       | SIEMENS        | ECAM SIGNATURE   | DELL        | ESOFT (SYNGO)  | DUAL DETECTOR | HI ENERGY  | YES             |             |            |
|           |         | Day 3       | SIEMANS        | ECAM SIGNATURE   | DELL        | ESOFT (SYNGO)  | DUAL DETECTOR | HI ENERGY  | YES             |             |            |
|           |         | Day 6       | SIEMENS        | ECAM (SIGNATURE) | DELL        | ESOFT (SYNGO)  | DUAL DETECTOR | HI ENERGY  | YES             |             |            |
|           |         | Day 14      | SIEMANS        | ECAM SIGNATURE   | DELL        | ESOFT (SYNGO)  | DUAL DETECTOR | HI ENERGY  | YES             |             |            |
|           | 103     | Blank       | SIEMENS        | ECAM SIGNATURE   | DELL        | SYNGO ESOFT    | DUAL DETECTOR | HI ENERGY  |                 |             | 122±10%    |
|           |         | Attenuation | SIEMENS        | ECAM SIGNATURE   | DELL        | SYNGO ESOFT    | DUAL DETECTOR | HI ENERGY  |                 |             | 122±10%    |
|           |         | 15 Minutes  | SIEMENS        | ECAM SIGNATURE   | DELL        | SYNGO ESOFT    | DUAL DETECTOR | HI ENERGY  |                 | NO          |            |
| 4-6 Hours |         | SIEMENS     | ECAM SIGNATURE | DELL             | SYNGO ESOFT | DUAL DETECTOR  | HI ENERGY     | YES        |                 |             |            |
| Day 1     |         | SIEMENS     | ECAM SIGNATURE | DELL             | SYNGO ESOFT | DUAL DETECTOR  | HI ENERGY     | YES        |                 |             |            |
| Day 2     |         | SIEMENS     | ECAM SIGNATURE | DELL             | SYNGO ESOFT | DUAL DETECTOR  | HI ENERGY     | YES        |                 |             |            |
| Day 3     |         | SIEMENS     | ECAM SIGNATURE | DELL             | SYNGO ESOFT | DUAL DETECTOR  | HI ENERGY     | YES        |                 |             |            |
| Day 6     |         | SIEMENS     | ECAM SIGNATURE | DELL             | SYNGO ESOFT | DUAL DETECTOR  | HI ENERGY     | YES        |                 |             |            |
| Day 14    |         | SIEMENS     | ECAM SIGNATURE | DELL             | ESOFT SYNGO | DUAL DETECTOR  | HI ENERGY     | YES        |                 |             |            |

Listing 17  
 Camera and Whole Body Imaging (Part I)

| Center  | Patient | Scan        | Camera       |               |         |          | Computer      |               | Camera Type | Collimator | Same as Initial | Void Prior? | CO-57 Peak |         |
|---------|---------|-------------|--------------|---------------|---------|----------|---------------|---------------|-------------|------------|-----------------|-------------|------------|---------|
|         |         |             | Manufacturer | Model         | Vendor  | Software |               |               |             |            |                 |             |            |         |
| XVO_003 | 201     | Blank       | GE           | MILLENNIUM VG | GE      | XELERIS  | DUAL DETECTOR | HI ENERGY     |             |            |                 |             | 122±10%    |         |
|         |         | Attenuation | GE           | MILLENNIUM VG | GE      | XELERIS  | DUAL DETECTOR | HI ENERGY     |             |            |                 |             | 122±10%    |         |
|         |         | 15 Minutes  | GE           | MILLENNIUM VG | GE      | XELERIS  | DUAL DETECTOR | HI ENERGY     |             |            | NO              |             |            |         |
|         |         | 4-6 Hours   | GE           | MILLENNIUM VG | GE      | XELERIS  | DUAL DETECTOR | HI ENERGY     | YES         |            |                 |             |            |         |
|         |         | Day 1       | GE           | MILLENNIUM VG | GE      | XELERIS  | DUAL DETECTOR | HI ENERGY     | YES         |            |                 |             |            |         |
|         |         | Day 2       | GE           | MILLENNIUM VG | GE      | XELERIS  | DUAL DETECTOR | HI ENERGY     | YES         |            |                 |             |            |         |
|         |         | Day 3       | GE           | MILLENNIUM VG | GE      | XELERIS  | DUAL DETECTOR | HI ENERGY     | YES         |            |                 |             |            |         |
|         |         | Day 6       | GE           | MILLENNIUM VG | GE      | XELERIS  | DUAL DETECTOR | HI ENERGY     | YES         |            |                 |             |            |         |
|         |         | Day 14      | GE           | MILLENNIUM VG | GE      | XELERIS  | DUAL DETECTOR | HI ENERGY     | YES         |            |                 |             |            |         |
| XVO_005 | 301     | Blank       | GE           | INFINIA       | GE      | XELERIS  | DUAL DETECTOR | HI ENERGY     |             |            |                 |             | 122±10%    |         |
|         |         | Attenuation | GE           | INFINIA       | GE      | XELERIS  | DUAL DETECTOR | HI ENERGY     |             |            |                 |             | 122±10%    |         |
|         |         | 15 Minutes  | GE           | INFINIA       | GE      | XELERIS  | DUAL DETECTOR | HI ENERGY     |             |            | NO              |             |            |         |
|         |         | 4-6 Hours   | GE           | INFINIA       | GE      | XELERIS  | DUAL DETECTOR | HI ENERGY     | YES         |            |                 |             |            |         |
|         |         | Day 1       | GE           | INFINIA       | GE      | XELERIS  | DUAL DETECTOR | HI ENERGY     | YES         |            |                 |             |            |         |
|         |         | Day 2       | GE           | INFINIA       | GE      | XELERIS  | DUAL DETECTOR | HI ENERGY     | YES         |            |                 |             |            |         |
|         | 302     | Blank       | Attenuation  | GE            | INFINIA | GE       | XELERIS       | DUAL DETECTOR | HI ENERGY   |            |                 |             |            | 122±10% |
|         |         |             | 15 Minutes   | GE            | INFINIA | GE       | XELERIS       | DUAL DETECTOR | HI ENERGY   |            |                 | NO          |            | 122±10% |
|         |         |             | 4-6 Hours    | GE            | INFINIA | GE       | XELERIS       | DUAL DETECTOR | HI ENERGY   | YES        |                 |             |            |         |
|         |         |             | Day 1        | GE            | INFINIA | GE       | XELERIS       | DUAL DETECTOR | HI ENERGY   | YES        |                 |             |            |         |
|         |         |             | Day 2        | GE            | INFINIA | GE       | XELERIS       | DUAL DETECTOR | HI ENERGY   | YES        |                 |             |            |         |
|         |         |             | Day 3        | GE            | INFINIA | GE       | XELERIS       | DUAL DETECTOR | HI ENERGY   | YES        |                 |             |            |         |

Listing 17  
 Camera and Whole Body Imaging (Part I)

| Center  | Patient | Scan        | Camera          |                 | Computer        |               | Camera Type   | Collimator    | Same as Initial | Void Prior?                                           | CO-57 Peak                                           |         |
|---------|---------|-------------|-----------------|-----------------|-----------------|---------------|---------------|---------------|-----------------|-------------------------------------------------------|------------------------------------------------------|---------|
|         |         |             | Manufacturer    | Model           | Vendor          | Software      |               |               |                 |                                                       |                                                      |         |
| XVO_007 | 401     | Blank       | GE              | INFINIA/HAWKEYE | GE              | XELERIS 1.1   | DUAL DETECTOR | HI ENERGY     |                 |                                                       | 122±10%                                              |         |
|         |         | Attenuation | GE              | INFINIA/HAWKEYE | GE              | XELERIS 1.1   | DUAL DETECTOR | HI ENERGY     |                 |                                                       | 122±10%                                              |         |
|         |         | 15 Minutes  | GE              | INFINIA/HAWKEYE | GE              | XELERIS 1.1   | DUAL DETECTOR | HI ENERGY     |                 | YES: PATIENT'S<br>BLADDER FULL<br>COULDN'T HOLD<br>IT |                                                      |         |
|         |         | 4-6 Hours   | GE              | INFINIA/HAWKEYE | GE              | XELERIS 1.1   | DUAL DETECTOR | HI ENERGY     | YES             |                                                       |                                                      |         |
|         |         | Day 1       | GE              | INFINIA/HAWKEYE | GE              | XELERIS 1.1   | DUAL DETECTOR | HI ENERGY     | YES             |                                                       |                                                      |         |
|         |         | Day 2       | GE              | INFINIA/HAWKEYE | GE              | XELERIS 1.1   | DUAL DETECTOR | HI ENERGY     | YES             |                                                       |                                                      |         |
|         |         | Day 3       | GE              | INFINIA/HAWKEYE | GE              | XELERIS 1.1   | DUAL DETECTOR | HI ENERGY     | YES             |                                                       |                                                      |         |
|         |         | Day 6       | GE              | INFINIA/HAWKEYE | GE              | XELERIS 1.1   | DUAL DETECTOR | HI ENERGY     | YES             |                                                       |                                                      |         |
|         |         | Day 14      | GE              | INFINIA/HAWKEYE | GE              | XELERIS 1.1   | DUAL DETECTOR | HI ENERGY     | YES             |                                                       |                                                      |         |
|         |         | 402         | Blank           | GE              | INFINIA/HAWKEYE | GE            | XELERIS 1.1   | DUAL DETECTOR | HI ENERGY       |                                                       |                                                      | 122±10% |
|         |         |             | Attenuation     | GE              | INFINIA/HAWKEYE | GE            | XELERIS 1.1   | DUAL DETECTOR | HI ENERGY       |                                                       |                                                      | 122±10% |
|         |         |             | 15 Minutes      | GE              | INFINIA/HAWKEYE | GE            | XELERIS 1.1   | DUAL DETECTOR | HI ENERGY       |                                                       | YES: CONDOM<br>CATHETER<br>PATIENT IS<br>INCONTINENT |         |
|         |         |             | 4-6 Hours       | GE              | INFINIA/HAWKEYE | GE            | XELERIS 1.1   | DUAL DETECTOR | HI ENERGY       | YES                                                   |                                                      |         |
|         |         |             | Day 1           | GE              | INFINIA/HAWKEYE | GE            | XELERIS 1.1   | DUAL DETECTOR | HI ENERGY       | YES                                                   |                                                      |         |
|         | Day 2   |             | GE              | INFINIA/HAWKEYE | GE              | XELERIS 1.1   | DUAL DETECTOR | HI ENERGY     | YES             |                                                       |                                                      |         |
|         | Day 3   |             | GE              | INFINIA/HAWKEYE | GE              | XELERIS 1.1   | DUAL DETECTOR | HI ENERGY     | YES             |                                                       |                                                      |         |
|         | Day 6   | GE          | INFINIA/HAWKEYE | GE              | XELERIS 1.1     | DUAL DETECTOR | HI ENERGY     | YES           |                 |                                                       |                                                      |         |
|         | Day 14  | GE          | INFINIA/HAWKEYE | GE              | XELERIS 1.1     | DUAL DETECTOR | HI ENERGY     | YES           |                 |                                                       |                                                      |         |



Listing 17  
 Camera and Whole Body Imaging (Part II)

| Center  | Patient    | Scan            | Acquisition Times |           | Scan Speed<br>[a] (cm/min) | Matrix                            | I-131<br>Peaks                    | Reference<br>Standard<br>Activity | Date/Time<br>Assayed | Urine Collection<br>Completed As<br>Per Protocol |
|---------|------------|-----------------|-------------------|-----------|----------------------------|-----------------------------------|-----------------------------------|-----------------------------------|----------------------|--------------------------------------------------|
|         |            |                 | Start/End         | Start/End |                            |                                   |                                   |                                   |                      |                                                  |
| XVO_001 | 101        | Blank           | 11:14/<br>11:26   |           | 20                         | 256 X 1024                        |                                   |                                   |                      |                                                  |
|         |            | Attenuation     | 13:10/<br>13:22   |           | 20                         | 256 X 1024                        |                                   |                                   |                      |                                                  |
|         | 15 Minutes | 15:46/<br>16:11 |                   | 10        | 256 X 1024                 | 298± 7.5%; 364±<br>10%; 436± 7.5% | 51 UCI                            | 10NOV2009<br>15:44                |                      |                                                  |
|         | 4-6 Hours  | 19:54/<br>20:17 |                   | 10        | 256 X 1024                 | 298± 7.5%; 364±<br>10%; 436± 7.5% | 48 UCI                            | 10NOV2009<br>19:52                | Yes                  |                                                  |
|         | Day 1      | 14:19/<br>14:43 | 14:54/<br>15:18   | 10        | 256 X 1024                 | 298± 7.5%; 364±<br>10%; 436± 7.5% | 47 UCI                            | 11NOV2009<br>14:19                | Yes                  |                                                  |
|         | Day 2      | 11:57/<br>12:23 |                   | 10        | 256 X 1024                 | 298± 7.5%; 364±<br>10%; 436± 7.5% | 43 UCI                            | 12NOV2009<br>11:54                | Yes                  |                                                  |
|         | Day 3      | 12:00/<br>12:24 |                   | 10        | 256 X 1024                 | 298± 7.5%; 364±<br>10%; 436± 7.5% | 38 UCI                            | 13NOV2009<br>12:43                | Yes                  |                                                  |
|         | Day 6      | 13:51/<br>14:14 |                   | 10        | 256 X 1024                 | 298± 7.5%; 364±<br>10%; 436± 7.5% | 27 UCI                            | 16NOV2009<br>13:48                | Yes                  |                                                  |
|         | Day 14     | 10:12/<br>10:36 |                   | 10        | 256 X 1024                 | 298± 7.5%; 364±<br>10%; 436± 7.5% | 20 UCI                            | 24NOV2009<br>10:09                | Yes                  |                                                  |
|         | 102        | Blank           | 09:31/<br>09:43   |           | 20                         | 256 X 1024                        |                                   |                                   |                      |                                                  |
|         |            | Attenuation     | 11:46/<br>11:57   |           | 20                         | 256 X 1024                        |                                   |                                   |                      |                                                  |
|         |            | 15 Minutes      | 13:35/<br>13:59   |           | 10                         | 256 X 1024                        | 298± 7.5%; 364±<br>10%; 436± 7.5% | 150 UCI                           | 15DEC2009<br>13:33   |                                                  |

Note: [a] second acquisition, if single detector  
 ND =Not Done

Listing 17  
 Camera and Whole Body Imaging (Part II)

| Center  | Patient | Scan        | Acquisition Times |                 | Scan Speed<br>[a] (cm/min) | Matrix     | I-131<br>Peaks                    | Reference<br>Standard<br>Activity | Date/Time<br>Assayed | Urine Collection<br>Completed As<br>Per Protocol |
|---------|---------|-------------|-------------------|-----------------|----------------------------|------------|-----------------------------------|-----------------------------------|----------------------|--------------------------------------------------|
|         |         |             | Start/End         | Start/End       |                            |            |                                   |                                   |                      |                                                  |
| XVO_001 | 102     | 4-6 Hours   | 17:15/<br>17:40   |                 | 10                         | 256 X 1024 | 298± 7.5%; 364±<br>10%; 436± 7.5% | 149 UCI                           | 15DEC2009<br>17:01   | Yes                                              |
|         |         | Day 1       | 12:37/<br>13:01   |                 | 10                         | 256 X 1024 | 298± 7.5%; 364±<br>10%; 436± 7.5% | 138 UCI                           | 16DEC2009<br>12:35   | Yes                                              |
|         |         | Day 2       | 16:45/<br>17:09   |                 | 10                         | 256 X 1024 | 298± 7.5%; 364±<br>10%; 436± 7.5% | 125 UCI                           | 17DEC2009<br>16:38   | Yes                                              |
|         |         | Day 3       | 10:52/<br>11:16   |                 | 10                         | 256 X 1024 | 298± 7.5%; 364±<br>10%; 436± 7.5% | 120 UCI                           | 18DEC2009<br>10:50   | Yes                                              |
|         |         | Day 6       | 10:49/<br>11:13   |                 | 10                         | 256 X 1024 | 298± 7.5%; 364±<br>10%; 436± 7.5% | ND                                |                      | Yes                                              |
|         |         | Day 14      | 11:20/<br>11:44   |                 | 10                         | 256 X 1024 | 298± 7.5%; 364±<br>10%; 436± 7.5% | 50 UCI                            | 29DEC2009<br>11:15   | Yes                                              |
|         |         | 103         | Blank             | 08:13/<br>08:25 |                            | 20         | 256 X 1024                        |                                   |                      |                                                  |
|         |         | Attenuation | 12:03/<br>12:15   |                 | 20                         | 256 X 1024 |                                   |                                   |                      |                                                  |
|         |         | 15 Minutes  | 13:21/<br>13:46   |                 | 10                         | 256 X 1024 | 298± 7.5%; 364±<br>10%; 436± 7.5% | 123 UCI                           | 12JAN2010<br>13:18   |                                                  |
|         |         | 4-6 Hours   | 17:19/<br>17:43   |                 | 10                         | 256 X 1024 | 298± 7.5%; 364±<br>10%; 436± 7.5% | 123 UCI                           | 12JAN2010<br>17:16   | Yes                                              |
|         |         | Day 1       | 09:32/<br>09:56   |                 | 10                         | 256 X 1024 | 298± 7.5%; 364±<br>10%; 436± 7.5% | 115 UCI                           | 13JAN2010<br>09:28   | Yes                                              |
|         |         | Day 2       | 09:13/<br>09:37   |                 | 10                         | 256 X 1024 | 298± 7.5%; 364±<br>10%; 436± 7.5% | 104 UCI                           | 14JAN2010<br>09:06   | Yes                                              |
|         |         | Day 3       | 13:28/<br>13:52   |                 | 10                         | 256 X 1024 | 298± 7.5%; 364±<br>10%; 436± 7.5% | 96 UCI                            | 15JAN2010<br>13:24   | Yes                                              |

Note: [a] second acquisition, if single detector  
 ND =Not Done

Listing 17  
 Camera and Whole Body Imaging (Part II)

| Center  | Patient | Scan        | Acquisition Times |           | Scan Speed<br>[a] (cm/min) | Matrix     | I-131<br>Peaks                    | Reference<br>Standard<br>Activity | Date/Time<br>Assayed | Urine Collection<br>Completed As<br>Per Protocol |
|---------|---------|-------------|-------------------|-----------|----------------------------|------------|-----------------------------------|-----------------------------------|----------------------|--------------------------------------------------|
|         |         |             | Start/End         | Start/End |                            |            |                                   |                                   |                      |                                                  |
| XVO_001 | 103     | Day 6       | 12:18/<br>12:46   |           | 10                         | 256 X 1024 | 298± 7.5%; 364±<br>10%; 436± 7.5% | 68 UCI                            | 19JAN2010<br>12:17   | Yes                                              |
|         |         | Day 14      | 10:18/<br>10:42   |           | 10                         | 256 X 1024 | 298± 7.5%; 364±<br>10%; 436± 7.5% | 38 UCI                            | 26JAN2010<br>10:10   | Yes                                              |
| XVO_003 | 201     | Blank       | 10:41/<br>10:53   |           | 20                         | 256 X 1024 |                                   |                                   |                      |                                                  |
|         |         | Attenuation | 10:19/<br>10:31   |           | 20                         | 256 X 1024 |                                   |                                   |                      |                                                  |
|         |         | 15 Minutes  | 14:10/<br>14:34   |           | 10                         | 256 X 1024 | 298± 7.5%; 364±<br>10%; 436± 7.5% | 0.156 MCI                         | 17NOV2009<br>12:50   |                                                  |
|         |         | 4-6 Hours   | 17:36/<br>18:00   |           | 10                         | 256 X 1024 | 298± 7.5%; 364±<br>10%; 436± 7.5% | 0.156 MCI                         | 17NOV2009<br>12:50   | Yes                                              |
|         |         | Day 1       | 10:43/<br>11:07   |           | 10                         | 256 X 1024 | 298± 7.5%; 364±<br>10%; 436± 7.5% | 0.156 MCI                         | 17NOV2009<br>12:50   | Yes                                              |
|         |         | Day 2       | 09:22/<br>09:45   |           | 10                         | 256 X 1024 | 298± 7.5%; 364±<br>10%; 436± 7.5% | 0.156 MCI                         | 17NOV2009<br>12:50   | Yes                                              |
|         |         | Day 3       | 09:50/<br>10:14   |           | 10                         | 256 X 1024 | 298± 7.5%; 364±<br>10%; 436± 7.5% | 0.156 MCI                         | 17NOV2009<br>12:50   | Yes                                              |
|         |         | Day 6       | 09:49/<br>10:12   |           | 10                         | 256 X 1024 | 298± 7.5%; 364±<br>10%; 436± 7.5% | 0.156 MCI                         | 17NOV2009<br>12:50   | Yes                                              |
| XVO_005 | 301     | Blank       | 16:14/<br>16:26   |           | 20                         | 256 X 1024 |                                   |                                   |                      |                                                  |
|         |         | Attenuation | 11:37/<br>11:49   |           | 20                         | 256 X 1024 |                                   |                                   |                      |                                                  |

Note: [a] second acquisition, if single detector  
 ND =Not Done

Listing 17  
 Camera and Whole Body Imaging (Part II)

| Center  | Patient | Scan        | Acquisition Times |               | Scan Speed<br>(cm/min) | Matrix     | I-131<br>Peaks                             | Reference<br>Standard<br>Activity | Date/Time<br>Assayed | Urine Collection<br>Completed As<br>Per Protocol                                                                                                                                                                |
|---------|---------|-------------|-------------------|---------------|------------------------|------------|--------------------------------------------|-----------------------------------|----------------------|-----------------------------------------------------------------------------------------------------------------------------------------------------------------------------------------------------------------|
|         |         |             | Start/End         | Start/End [a] |                        |            |                                            |                                   |                      |                                                                                                                                                                                                                 |
| XVO_005 | 301     | 15 Minutes  | 12:45/<br>13:07   |               | 10                     | 256 X 1024 | OTHER: 298 ± 7.5%;<br>364 ± 7.5% 436 ± 10% | 145.7 UCI                         | 04AUG2009<br>12:43   |                                                                                                                                                                                                                 |
|         |         | 4-6 Hours   | 17:05/<br>17:26   |               | 10                     | 256 X 1024 | OTHER: 298±7.5%;<br>364±7.5% 436±10%       | 143.4 UCI                         | 04AUG2009<br>17:00   | Yes                                                                                                                                                                                                             |
|         |         | Day 1       | 11:57/<br>12:18   |               | 20                     | 256 X 1024 | OTHER: 298+-7.5%;<br>364+-7.5% 436+-10%    | 134 UCI                           | 05AUG2009<br>11:45   | Yes                                                                                                                                                                                                             |
|         |         | Day 2       | 09:51/<br>10:12   |               | 20                     | 256 X 1024 | OTHER: 298+-7.5%;<br>364+-7.5% 436+-10%    | 123.8 UCI                         | 06AUG2009<br>09:45   | Yes                                                                                                                                                                                                             |
|         |         | Day 3       | 09:55/<br>10:18   |               | 10                     | 256 X 1024 | OTHER: 298+-7.5%;<br>364+-7.5% 436+-10%    | 113.2 UCI                         | 07AUG2009<br>09:45   | Yes                                                                                                                                                                                                             |
|         |         | Day 6       | 11:40/<br>12:03   |               | 10                     | 256 X 1024 | OTHER: 298+-7.5%;<br>364+-7.5% 436+-10%    | 87.25 UCI                         | 10AUG2009<br>11:30   | Yes                                                                                                                                                                                                             |
|         |         | Day 14      | 11:26/<br>11:47   |               | 10                     | 256 X 1024 | OTHER: 298+-7.5%;<br>364+-7.5% 436+-10%    | 43.8 UCI                          | 18AUG2009<br>11:05   | No: SUBJECT MISSED<br>ONE URINE COLLECTION<br>ON 11/AUG/2009, DAY 7<br>OF PROTOCOL. URINE<br>COLLECTION MISSED WAS<br>EARLY MORNING OF<br>11/AUG/2009. URINE<br>WOULD HAVE BEEN<br>COLLECTED IN DAY 6-7<br>JUG. |
|         |         |             |                   |               |                        |            |                                            |                                   |                      |                                                                                                                                                                                                                 |
|         | 302     | Blank       | 11:11/<br>11:24   |               | 20                     | 256 X 1024 |                                            |                                   |                      |                                                                                                                                                                                                                 |
|         |         | Attenuation | 11:44/<br>11:57   |               | 20                     | 256 X 1024 |                                            |                                   |                      |                                                                                                                                                                                                                 |
|         |         | 15 Minutes  | 12:37/<br>12:58   |               | 10                     | 256 X 1024 | 298± 7.5%; 364±<br>10%; 436± 7.5%          | 136.4 UCI                         | 15DEC2009<br>11:36   |                                                                                                                                                                                                                 |

Note: [a] second acquisition, if single detector  
 ND =Not Done

Listing 17  
 Camera and Whole Body Imaging (Part II)

| Center      | Patient         | Scan      | Acquisition Times |           | Scan Speed<br>[a] (cm/min) | Matrix     | I-131<br>Peaks                    | Reference<br>Standard<br>Activity | Date/Time<br>Assayed | Urine Collection<br>Completed As<br>Per Protocol |
|-------------|-----------------|-----------|-------------------|-----------|----------------------------|------------|-----------------------------------|-----------------------------------|----------------------|--------------------------------------------------|
|             |                 |           | Start/End         | Start/End |                            |            |                                   |                                   |                      |                                                  |
| XVO_005     | 302             | 4-6 Hours | 16:33/<br>16:57   |           | 10                         | 256 X 1024 | 298± 7.5%; 364±<br>10%; 436± 7.5% | 147.8 UCI                         | 15DEC2009<br>16:33   | Yes                                              |
|             |                 | Day 1     | 10:45/<br>11:09   |           | 10                         | 256 X 1024 | 298± 7.5%; 364±<br>10%; 436± 7.5% | 116.4 UCI                         | 16DEC2009<br>10:35   | Yes                                              |
|             |                 | Day 2     | 10:43/<br>11:05   |           | 10                         | 256 X 1024 | 298± 7.5%; 364±<br>10%; 436± 7.5% | 112.5 UCI                         | 17DEC2009<br>10:36   | Yes                                              |
|             |                 | Day 3     | 09:50/<br>10:12   |           | 10                         | 256 X 1024 | 298± 7.5%; 364±<br>10%; 436± 7.5% | 104.2 UCI                         | 18DEC2009<br>10:16   | Yes                                              |
|             |                 | Day 6     | 10:08/<br>10:31   |           | 10                         | 256 X 1024 | 298± 7.5%; 364±<br>10%; 436± 7.5% | 81.0 UCI                          | 21DEC2009<br>09:45   | Yes                                              |
|             |                 | Day 14    | 10:23/<br>10:44   |           | 10                         | 256 X 1024 | 298± 7.5%; 364±<br>10%; 436± 7.5% | 38.1 UCI                          | 29DEC2009<br>09:35   | Yes                                              |
|             |                 | XVO_007   | 401               | Blank     | 08:35/<br>08:45            |            | 20                                | 256 X 1024                        |                      |                                                  |
| Attenuation | 11:59/<br>12:10 |           |                   |           | 20                         | 256 X 1024 |                                   |                                   |                      |                                                  |
| 15 Minutes  | 13:10/<br>13:31 |           |                   |           | 10                         | 256 X 1024 | 298± 7.5%; 364±<br>10%; 436± 7.5% | 143 UCI                           | 10NOV2009<br>11:28   |                                                  |
| 4-6 Hours   | 17:00/<br>17:22 |           |                   |           | 10                         | 256 X 1024 | 298± 7.5%; 364±<br>10%; 436± 7.5% | 143 UCI                           | 10NOV2009<br>11:28   | Yes                                              |
| Day 1       | 08:10/<br>08:33 |           |                   |           | 10                         | 256 X 1024 | 298± 7.5%; 364±<br>10%; 436± 7.5% | 143 UCI                           | 10NOV2009<br>11:28   | Yes                                              |
| Day 2       | 10:05/<br>10:27 |           |                   |           | 10                         | 256 X 1024 | 298± 7.5%; 364±<br>10%; 436± 7.5% | 143 UCI                           | 10NOV2009<br>11:28   | Yes                                              |
| Day 3       | 08:44/<br>09:06 |           |                   |           | 10                         | 256 X 1024 | 298± 7.5%; 364±<br>10%; 436± 7.5% | 143 UCI                           | 10NOV2009<br>11:20   | Yes                                              |

Note: [a] second acquisition, if single detector  
 ND =Not Done

Listing 17  
 Camera and Whole Body Imaging (Part II)

| Center  | Patient | Scan        | Acquisition Times |           | Scan Speed<br>[a] (cm/min) | Matrix     | I-131<br>Peaks                    | Reference<br>Standard<br>Activity | Date/Time<br>Assayed | Urine Collection<br>Completed As<br>Per Protocol |
|---------|---------|-------------|-------------------|-----------|----------------------------|------------|-----------------------------------|-----------------------------------|----------------------|--------------------------------------------------|
|         |         |             | Start/End         | Start/End |                            |            |                                   |                                   |                      |                                                  |
| XVO_007 | 401     | Day 6       | 09:24/<br>09:46   |           | 10                         | 256 X 1024 | 298± 7.5%; 364±<br>10%; 436± 7.5% | 143 UCI                           | 10NOV2009<br>11:28   | Yes                                              |
|         |         | Day 14      | 08:23/<br>08:47   |           | 10                         | 256 X 1024 | 298± 7.5%; 364±<br>10%; 436± 7.5% | 143 UCI                           | 10NOV2009<br>11:28   | Yes                                              |
|         | 402     | Blank       | 11:00/<br>11:11   |           | 20                         | 256 X 1024 |                                   |                                   |                      |                                                  |
|         |         | Attenuation | 11:42/<br>11:53   |           | 20                         | 256 X 1024 |                                   |                                   |                      |                                                  |
|         |         | 15 Minutes  | 12:49/<br>13:13   |           | 10                         | 256 X 1024 | 298± 7.5%; 364±<br>10%; 436± 7.5% | 136 UCI                           | 08DEC2009<br>11:22   |                                                  |
|         |         | 4-6 Hours   | 16:56/<br>17:19   |           | 10                         | 256 X 1024 | 298± 7.5%; 364±<br>10%; 436± 7.5% | 136 UCI                           | 08DEC2009<br>11:22   | Yes                                              |
|         |         | Day 1       | 08:28/<br>08:52   |           | 10                         | 256 X 1024 | 298± 7.5%; 364±<br>10%; 436± 7.5% | 136 UCI                           | 08DEC2009<br>11:22   | Yes                                              |
|         |         | Day 2       | 08:25/<br>08:49   |           | 10                         | 256 X 1024 | 298± 7.5%; 364±<br>10%; 436± 7.5% | 136 UCI                           | 08DEC2009<br>11:22   | Yes                                              |
|         |         | Day 3       | 08:17/<br>08:40   |           | 10                         | 256 X 1024 | 298± 7.5%; 364±<br>10%; 436± 7.5% | 136 UCI                           | 08DEC2009<br>11:22   | Yes                                              |
|         |         | Day 6       | 12:54/<br>13:18   |           | 10                         | 256 X 1024 | 298± 7.5%; 364±<br>10%; 436± 7.5% | 82.8 UCI                          | 14DEC2009<br>13:23   | Yes                                              |
|         |         | Day 14      | 08:28/<br>08:51   |           | 10                         | 256 X 1024 | 298± 7.5%; 364±<br>10%; 436± 7.5% | 136 UCI                           | 08DEC2009<br>11:22   | Yes                                              |

Note: [a] second acquisition, if single detector  
 ND =Not Done

Listing 18.1  
 Blood Sampling Times - Biodistribution

| Center  | Patient   | Time Point         | Date      | Actual Time | Actual Time Post Dose |
|---------|-----------|--------------------|-----------|-------------|-----------------------|
| XVO_001 | 101       | Day 0 Pre-dose     | 10NOV2009 | 14:11       | -01:03                |
|         |           | Infusion Stop Time |           | 15:24       | 00:10                 |
|         |           | 15 Minutes         |           | 15:39       | 00:25                 |
|         |           | 60 Minutes         |           | 16:36       | 01:22                 |
|         |           | 4-6 Hours          |           | 19:41       | 04:27                 |
|         |           | 18-24 Hours        | 11NOV2009 | 15:36       | 24:22                 |
|         |           | Day 2              | 12NOV2009 | 11:36       | 44:22                 |
|         |           | Day 3              | 13NOV2009 | 11:54       | 68:40                 |
|         |           | Day 6              | 16NOV2009 | 13:45       | 142:31                |
|         |           | Day 14             | 24NOV2009 | 10:50       | 331:36                |
|         | Day 30    | 11DEC2009          | 12:00     | 740:46      |                       |
|         | Day 42    | 05JAN2010          | 14:30     | 1343:16     |                       |
|         | 102       | Day 0 Pre-dose     | 15DEC2009 | 12:32       | -00:13                |
|         |           | Infusion Stop Time |           | 12:55       | 00:10                 |
|         |           | 15 Minutes         |           | 13:13       | 00:28                 |
|         |           | 60 Minutes         |           | 14:07       | 01:22                 |
|         |           | 4-6 Hours          |           | 17:40       | 04:55                 |
|         |           | 18-24 Hours        | 16DEC2009 | 13:20       | 24:35                 |
|         |           | Day 2              | 17DEC2009 | 16:22       | 51:37                 |
|         |           | Day 3              | 18DEC2009 | 18:17       | 77:32                 |
| Day 6   |           | 21DEC2009          | 08:40     | 139:55      |                       |
| Day 14  |           | 29DEC2009          | 08:41     | 331:56      |                       |
| Day 30  | 15JAN2010 | 08:20              | 739:35    |             |                       |
| Day 42  | 28JAN2010 | 09:50              | 1053:05   |             |                       |

Listing 18.1  
 Blood Sampling Times - Biodistribution

| Center      | Patient   | Time Point         | Date      | Actual Time        | Actual Time Post Dose |       |        |
|-------------|-----------|--------------------|-----------|--------------------|-----------------------|-------|--------|
| XVO_001     | 103       | Day 0 Pre-dose     | 12JAN2010 | 12:33              | -00:18                |       |        |
|             |           | Infusion Stop Time |           | 13:01              | 00:10                 |       |        |
|             |           | 15 Minutes         |           | 13:16              | 00:25                 |       |        |
|             |           | 60 Minutes         |           | 14:09              | 01:18                 |       |        |
|             |           | 4-6 Hours          |           | 17:06              | 04:15                 |       |        |
|             |           | 18-24 Hours        | 13JAN2010 | 09:10              | 20:19                 |       |        |
|             |           | Day 2              | 14JAN2010 | 09:52              | 45:01                 |       |        |
|             |           | Day 3              | 15JAN2010 | 15:03              | 74:12                 |       |        |
|             |           | Day 6              | 19JAN2010 | 12:12              | 167:21                |       |        |
|             |           | Day 14             | 26JAN2010 | 10:15              | 333:24                |       |        |
|             |           | Day 30             | 09FEB2010 | 12:05              | 671:14                |       |        |
|             |           | Day 42             | 19FEB2010 | 08:15              | 907:24                |       |        |
|             |           | XVO_003            | 201       | Day 0 Pre-dose     | 17NOV2009             | 08:50 | -04:25 |
|             |           |                    |           | Infusion Stop Time |                       | 13:25 | 00:10  |
| 15 Minutes  |           |                    |           | 13:41              | 00:26                 |       |        |
| 60 Minutes  |           |                    |           | 14:25              | 01:10                 |       |        |
| 4-6 Hours   |           |                    |           | 17:15              | 04:00                 |       |        |
| 18-24 Hours | 18NOV2009 |                    |           | 09:13              | 19:58                 |       |        |
| Day 2       | 19NOV2009 |                    |           | 08:45              | 43:30                 |       |        |
| Day 3       | 20NOV2009 |                    |           | 08:47              | 67:32                 |       |        |
| Day 6       | 23NOV2009 |                    |           | 09:05              | 139:50                |       |        |
| Day 14      | 02DEC2009 |                    |           | 09:00              | 355:45                |       |        |
| Day 30      | 22DEC2009 |                    |           | 09:02              | 835:47                |       |        |
| Day 42      | 29DEC2009 |                    |           | 08:54              | 1003:39               |       |        |



Listing 18.1  
 Blood Sampling Times - Biodistribution

| Center  | Patient   | Time Point         | Date      | Actual Time | Actual Time Post Dose |
|---------|-----------|--------------------|-----------|-------------|-----------------------|
| XVO_005 | 301       | Day 0 Pre-dose     | 04AUG2009 | 11:57       | -00:12                |
|         |           | Infusion Stop Time |           | 12:20       | 00:11                 |
|         |           | 15 Minutes         |           | 12:40       | 00:31                 |
|         |           | 60 Minutes         |           | 13:25       | 01:16                 |
|         |           | 4-6 Hours          |           | 16:38       | 04:29                 |
|         |           | 18-24 Hours        | 05AUG2009 | 11:20       | 23:11                 |
|         |           | Day 2              | 06AUG2009 | 09:45       | 45:36                 |
|         |           | Day 3              | 07AUG2009 | 09:44       | 69:35                 |
|         |           | Day 6              | 10AUG2009 | 10:45       | 142:36                |
|         |           | Day 14             | 18AUG2009 | 10:28       | 334:19                |
|         | Day 30    | 04SEP2009          | 10:03     | 741:54      |                       |
|         | Day 42    | 15SEP2009          | 10:20     | 1006:11     |                       |
|         | 302       | Day 0 Pre-dose     | 15DEC2009 | 09:07       | -02:56                |
|         |           | Infusion Stop Time |           | 12:13       | 00:10                 |
|         |           | 15 Minutes         |           | 12:28       | 00:25                 |
|         |           | 60 Minutes         |           | 13:13       | 01:10                 |
|         |           | 4-6 Hours          |           | 16:20       | 04:17                 |
|         |           | 18-24 Hours        | 16DEC2009 | 10:30       | 22:27                 |
|         |           | Day 2              | 17DEC2009 | 10:35       | 46:32                 |
|         |           | Day 3              | 18DEC2009 | 08:30       | 68:27                 |
| Day 6   |           | 21DEC2009          | 08:40     | 140:37      |                       |
| Day 14  |           | 29DEC2009          | 08:40     | 332:37      |                       |
| Day 30  | 15JAN2010 | 10:40              | 742:37    |             |                       |
| Day 42  | 25JAN2010 | 11:18              | 983:15    |             |                       |

Listing 18.1  
 Blood Sampling Times - Biodistribution

| Center  | Patient   | Time Point         | Date      | Actual Time | Actual Time Post Dose |
|---------|-----------|--------------------|-----------|-------------|-----------------------|
| XVO_007 | 401       | Day 0 Pre-dose     | 10NOV2009 | 10:38       | -01:47                |
|         |           | Infusion Stop Time |           | 12:36       | 00:11                 |
|         |           | 15 Minutes         |           | 12:51       | 00:26                 |
|         |           | 60 Minutes         |           | 13:36       | 01:11                 |
|         |           | 4-6 Hours          |           | 16:40       | 04:15                 |
|         |           | 18-24 Hours        | 11NOV2009 | 08:50       | 20:25                 |
|         |           | Day 2              | 12NOV2009 | 11:10       | 46:45                 |
|         |           | Day 3              | 13NOV2009 | 08:15       | 67:50                 |
|         |           | Day 6              | 16NOV2009 | 08:45       | 140:20                |
|         |           | Day 14             | 24NOV2009 | 09:45       | 333:20                |
|         | Day 30    | 08DEC2009          | 12:15     | 671:50      |                       |
|         | Day 42    | 22DEC2009          | 14:30     | 1010:05     |                       |
|         | 402       | Day 0 Pre-dose     | 08DEC2009 | 11:30       | -00:54                |
|         |           | Infusion Stop Time |           | 12:34       | 00:10                 |
|         |           | 15 Minutes         |           | 13:05       | 00:41                 |
|         |           | 60 Minutes         |           | 13:37       | 01:13                 |
|         |           | 4-6 Hours          |           | 16:45       | 04:21                 |
|         |           | 18-24 Hours        | 09DEC2009 | 08:00       | 19:36                 |
|         |           | Day 2              | 10DEC2009 | 08:20       | 43:56                 |
|         |           | Day 3              | 11DEC2009 | 08:00       | 67:36                 |
| Day 6   |           | 14DEC2009          | 11:45     | 143:21      |                       |
| Day 14  |           | 22DEC2009          | 09:50     | 333:26      |                       |
| Day 30  | 05JAN2010 | 10:00              | 669:36    |             |                       |
| Day 42  | 19JAN2010 | 11:50              | 1007:26   |             |                       |

Listing 18.2  
 Blood Sampling Times - Pharmacokinetics

| Center      | Patient | Time Point         | Date      | Actual Time | Actual Time Post Dose |
|-------------|---------|--------------------|-----------|-------------|-----------------------|
| XVO_001     | 101     | Day 0 Pre-dose     | 10NOV2009 | 14:11       | -01:03                |
|             |         | Infusion Stop Time |           | 15:24       | 00:10                 |
|             |         | 5 Minutes          |           | 15:19       | 00:05                 |
|             |         | 15 Minutes         |           | 15:39       | 00:25                 |
|             |         | 30 Minutes         |           | 16:09       | 00:55                 |
|             |         | 60 Minutes         |           | 16:36       | 01:22                 |
|             |         | 4-6 Hours          |           | 19:41       | 04:27                 |
|             |         | 18-24 Hours        | 11NOV2009 | 15:36       | 24:22                 |
|             |         | Day 2              | 12NOV2009 | 11:35       | 44:21                 |
|             |         | Day 3              | 13NOV2009 | 11:54       | 68:40                 |
|             |         | Day 6              | 16NOV2009 | 13:45       | 142:31                |
|             |         | Day 14             | 24NOV2009 | 10:50       | 331:36                |
|             |         | Day 30             | 11DEC2009 | 12:00       | 740:46                |
|             |         | Day 42             | 05JAN2010 | 14:30       | 1343:16               |
|             | 102     | Day 0 Pre-dose     | 15DEC2009 | 12:31       | -00:14                |
|             |         | Infusion Stop Time |           | 12:55       | 00:10                 |
|             |         | 5 Minutes          |           | 13:08       | 00:23                 |
|             |         | 15 Minutes         |           | 13:12       | 00:27                 |
|             |         | 30 Minutes         |           | 13:25       | 00:40                 |
|             |         | 60 Minutes         |           | 14:07       | 01:22                 |
|             |         | 4-6 Hours          |           | 17:40       | 04:55                 |
| 18-24 Hours |         | 16DEC2009          | 13:25     | 24:40       |                       |
| Day 2       |         | 17DEC2009          | 16:21     | 51:36       |                       |
| Day 3       |         | 18DEC2009          | 18:17     | 77:32       |                       |
| Day 6       |         | 21DEC2009          | 08:40     | 139:55      |                       |
| Day 14      |         | 29DEC2009          | 08:41     | 331:56      |                       |
| Day 30      |         | 15JAN2010          | 08:20     | 739:35      |                       |
| Day 42      |         | 28JAN2010          | 09:50     | 1053:05     |                       |

Listing 18.2  
 Blood Sampling Times - Pharmacokinetics

| Center             | Patient   | Time Point         | Date      | Actual Time    | Actual Time Post Dose |
|--------------------|-----------|--------------------|-----------|----------------|-----------------------|
| XVO_001            | 103       | Day 0 Pre-dose     | 12JAN2010 | 12:33          | -00:18                |
|                    |           | Infusion Stop Time |           | 13:01          | 00:10                 |
|                    |           | 5 Minutes          |           | 13:06          | 00:15                 |
|                    |           | 15 Minutes         |           | 13:16          | 00:25                 |
|                    |           | 30 Minutes         |           | 13:33          | 00:42                 |
|                    |           | 60 Minutes         |           | 14:09          | 01:18                 |
|                    |           | 4-6 Hours          |           | 17:06          | 04:15                 |
|                    |           | 18-24 Hours        | 13JAN2010 | 09:11          | 20:20                 |
|                    |           | Day 2              | 14JAN2010 | 09:52          | 45:01                 |
|                    |           | Day 3              | 15JAN2010 | 15:03          | 74:12                 |
|                    |           | Day 6              | 19JAN2010 | 12:12          | 167:21                |
|                    |           | Day 14             | 26JAN2010 | 10:15          | 333:24                |
|                    |           | Day 30             | 09FEB2010 | 12:05          | 671:14                |
|                    |           | Day 42             | 19FEB2010 | 08:15          | 907:24                |
|                    |           | XVO_003            | 201       | Day 0 Pre-dose | 17NOV2009             |
| Infusion Stop Time |           |                    |           | 13:25          | 00:10                 |
| 5 Minutes          |           |                    |           | 13:30          | 00:15                 |
| 15 Minutes         |           |                    |           | 13:41          | 00:26                 |
| 30 Minutes         |           |                    |           | 13:55          | 00:40                 |
| 60 Minutes         |           |                    |           | 14:25          | 01:10                 |
| 4-6 Hours          |           |                    |           | 17:15          | 04:00                 |
| 18-24 Hours        | 18NOV2009 |                    |           | 09:13          | 19:58                 |
| Day 2              | 19NOV2009 |                    |           | 08:45          | 43:30                 |
| Day 3              | 20NOV2009 |                    |           | 08:47          | 67:32                 |
| Day 6              | 23NOV2009 |                    |           | 09:05          | 139:50                |
| Day 14             | 02DEC2009 |                    |           | 09:00          | 355:45                |
| Day 30             | 22DEC2009 |                    |           | 09:02          | 835:47                |
| Day 42             | 29DEC2009 |                    |           | 08:54          | 1003:39               |

Listing 18.2  
 Blood Sampling Times - Pharmacokinetics

| Center      | Patient | Time Point         | Date      | Actual Time | Actual Time Post Dose |
|-------------|---------|--------------------|-----------|-------------|-----------------------|
| XVO_005     | 301     | Day 0 Pre-dose     | 04AUG2009 | 11:57       | -00:12                |
|             |         | Infusion Stop Time |           | 12:20       | 00:11                 |
|             |         | 5 Minutes          |           | 12:30       | 00:21                 |
|             |         | 15 Minutes         |           | 12:40       | 00:31                 |
|             |         | 30 Minutes         |           |             |                       |
|             |         | 60 Minutes         |           | 13:25       | 01:16                 |
|             |         | 4-6 Hours          |           | 16:38       | 04:29                 |
|             |         | 18-24 Hours        | 05AUG2009 | 11:20       | 23:11                 |
|             |         | Day 2              | 06AUG2009 | 09:45       | 45:36                 |
|             |         | Day 3              | 07AUG2009 | 09:44       | 69:35                 |
|             |         | Day 6              | 10AUG2009 | 10:45       | 142:36                |
|             |         | Day 14             | 18AUG2009 | 10:28       | 334:19                |
|             |         | Day 30             | 04SEP2009 | 10:05       | 741:56                |
|             |         | Day 42             | 15SEP2009 | 10:20       | 1006:11               |
|             | 302     | Day 0 Pre-dose     | 15DEC2009 | 09:07       | -02:56                |
|             |         | Infusion Stop Time |           | 12:13       | 00:10                 |
|             |         | 5 Minutes          |           | 12:18       | 00:15                 |
|             |         | 15 Minutes         |           | 12:28       | 00:25                 |
|             |         | 30 Minutes         |           |             |                       |
|             |         | 60 Minutes         |           | 13:13       | 01:10                 |
|             |         | 4-6 Hours          |           | 16:20       | 04:17                 |
| 18-24 Hours |         | 16DEC2009          | 10:30     | 22:27       |                       |
| Day 2       |         | 17DEC2009          | 10:35     | 46:32       |                       |
| Day 3       |         | 18DEC2009          | 08:30     | 68:27       |                       |
| Day 6       |         | 21DEC2009          | 08:40     | 140:37      |                       |
| Day 14      |         | 29DEC2009          | 08:40     | 332:37      |                       |
| Day 30      |         | 15JAN2010          | 10:40     | 742:37      |                       |
| Day 42      |         | 25JAN2010          | 11:18     | 983:15      |                       |

Listing 18.2  
 Blood Sampling Times - Pharmacokinetics

| Center      | Patient            | Time Point         | Date           | Actual Time | Actual Time Post Dose |
|-------------|--------------------|--------------------|----------------|-------------|-----------------------|
| XVO_007     | 401                | Day 0 Pre-dose     | 10NOV2009      | 10:38       | -01:47                |
|             |                    | Infusion Stop Time |                | 12:36       | 00:11                 |
|             |                    | 5 Minutes          |                | 12:41       | 00:16                 |
|             |                    | 15 Minutes         |                | 12:51       | 00:26                 |
|             |                    | 30 Minutes         |                | 13:06       | 00:41                 |
|             |                    | 60 Minutes         |                | 13:36       | 01:11                 |
|             |                    | 4-6 Hours          |                | 16:40       | 04:15                 |
|             |                    | 18-24 Hours        | 11NOV2009      | 08:50       | 20:25                 |
|             |                    | Day 2              | 12NOV2009      | 11:10       | 46:45                 |
|             |                    | Day 3              | 13NOV2009      | 08:15       | 67:50                 |
|             |                    | Day 6              | 16NOV2009      | 08:45       | 140:20                |
|             |                    | Day 14             | 24NOV2009      | 09:45       | 333:20                |
|             |                    | Day 30             | 08DEC2009      | 12:15       | 671:50                |
|             |                    | Day 42             | 22DEC2009      | 14:30       | 1010:05               |
|             |                    | 402                | Day 0 Pre-dose | 08DEC2009   | 11:30                 |
|             | Infusion Stop Time |                    |                | 12:34       | 00:10                 |
|             | 5 Minutes          |                    |                | 12:39       | 00:15                 |
|             | 15 Minutes         |                    |                | 13:05       | 00:41                 |
|             | 30 Minutes         |                    |                | 13:12       | 00:48                 |
|             | 60 Minutes         |                    |                | 13:37       | 01:13                 |
|             | 4-6 Hours          |                    |                | 16:45       | 04:21                 |
| 18-24 Hours | 09DEC2009          |                    | 08:00          | 19:36       |                       |
| Day 2       | 10DEC2009          |                    | 08:20          | 43:56       |                       |
| Day 3       | 11DEC2009          |                    | 08:00          | 67:36       |                       |
| Day 6       | 14DEC2009          |                    | 11:45          | 143:21      |                       |
| Day 14      | 22DEC2009          |                    | 09:50          | 333:26      |                       |
| Day 30      | 05JAN2010          |                    | 10:00          | 669:36      |                       |
| Day 42      | 19JAN2010          |                    | 11:50          | 1007:26     |                       |

Listing 19  
Study Termination

---

| Center  | Patient | Date of Visit | Reason for Ending Study Participation |
|---------|---------|---------------|---------------------------------------|
| XVO_001 | 101     | 05JAN2010     | Study Completed                       |
|         | 102     | 29JAN2010     | Study Completed                       |
|         | 103     | 19FEB2010     | Study Completed                       |
| XVO_003 | 201     | 29DEC2009     | Study Completed                       |
| XVO_005 | 301     | 15SEP2009     | Study Completed                       |
|         | 302     | 25JAN2010     | Study Completed                       |
| XVO_007 | 401     | 22DEC2009     | Study Completed                       |
|         | 402     | 19JAN2010     | Study Completed                       |

---

Listing 20  
Study Comments

| Center  | Patient | Date      | CRF Page | Comment                                                                                                                                                    |
|---------|---------|-----------|----------|------------------------------------------------------------------------------------------------------------------------------------------------------------|
| XVO_001 | 101     | 12MAR2009 | 018      | TEMP AT 46HR INTERVAL NOT RECORDED DUE TO SITE OVERSIGHT.                                                                                                  |
|         |         |           | 025      | VITALS NOT TAKEN AT 30MIN INTERVAL DUE TO PATIENT BEING UNDER SCANNER.<br>13NOV2009 VITAL SIGNS: CRF IS SOURCE DOUCUMENT.                                  |
|         |         |           | 028      | SAO2% NOTDONE DUE TO SITE OVERSIGHT                                                                                                                        |
|         |         |           | 032      | VITALS COMPLETED IN UPRIGHT POSITION                                                                                                                       |
|         |         | 13JAN2010 | OPK      | BLOOD DRAWN 5MIN AFTER INFUSION INSTEAD OF 5MIN AFTER INFUSION ENDED                                                                                       |
|         |         |           | 39       | DAY 56 05-JAN2010 BLOOD PRESSURE WAS OBTAINED UPRIGHT INSTEAD OF SUPINE                                                                                    |
|         |         | 10FEB2010 | 37       | PHYSICAL EXAMINATION PAGE FOR DAY 31 SHOULD HAVE BEEN NUMBERED PAGE 37AND WAS MISTAKENLY NUMBERED 33. DAY 31VISIT IS NOT OUTSIDE OF PROTOCOL.              |
|         |         |           | 42       | PAGES 39,40,41,42;ALL PATIENT ASSESSMENT FOR DAY 42 PER PROTOCOL WERE PERFORMED ON DAY 56 DUE TO PATIENT BEING ON VACATION AND UNAVAILABLE FOR FOLLOW-UP   |
|         |         | 22FEB2010 | PG.039   | VITALS UPRIGHT AT DAY 30 VISIT                                                                                                                             |
|         |         |           | PG.041   | GGT NOT DONE : URINALYSIS NOT DONE DUE TO OVERSIGHT                                                                                                        |
| XVO_001 | 102     | 22FEB2010 | PG 06    | SCREENING VITALS PERFORMED IN UPRIGHT POSITION                                                                                                             |
|         |         |           | PG 10    | PHASE I TRAIL OF ERBITUX & IRINOTECAN & RAD001 JUN2008-JUL2009                                                                                             |
| XVO_001 | 103     | 03MAR2010 | PG28     | DAY 6 ASSESSMENTS PERFORMED ON DAY 7 DS 03/MAR/2010.                                                                                                       |
| XVO_003 | 201     | 20JAN2010 | 002      | INR DRAWN 22DEC2009 AND WAS WNL                                                                                                                            |
|         |         |           | 010      | PATIENT WAS ON OCTREOTIDE THERAPY FROM 28MAY2009 TO 30JUL2009. THIS WAS FOR SYMPTOM RELIEF OF CHRONIC DIARRHEA AND NOT ANTI-TUMOR THERAPY.                 |
|         |         |           | 018      | PATIENT HAS HISTORY OF LABILE BP NOTED THROUGHOUT THE STUDY; HOWEVER THE SIGNIFICANT CHANGE IN SBP AND DBP BETWEEN 60MIN AND 4-6 HRS IS RECORDED AS AN AE. |
|         |         |           | 019      | 15MIN IMAGE START TIME WAS 35MIN POST INJECTION. PROTOCOL STATES "15MIN +- 5MIN". DELAY WAS DUE TO LOGISTICS OF GETTING 15 AND 30MIN BLOOD SAMPLES.        |
|         |         |           | 036      | DAY 35 VISIT WAS OUTSIDE THE PROTOCOL-DEFINED RANGE OF 30 +- 2 DAYS DUE TO PATIENT VACATION.                                                               |
| XVO_005 | 301     | 04AUG2009 | OBD      | 15 MINUTE BIODISTRIBUTION WAS DELAYED DUE TO DIFFICULTY WITH BLOOD DRAW                                                                                    |
|         |         |           | OPK      | 15 MINUTE PK WAS DELAYED DUE TO DIFFICULTY WITH BLOOD DRAW.                                                                                                |



Listing 20  
Study Comments

---

| Center  | Patient | Date      | CRF Page   | Comment                                                                                                                                                                              |
|---------|---------|-----------|------------|--------------------------------------------------------------------------------------------------------------------------------------------------------------------------------------|
| XVO_005 | 301     | 10AUG2009 | 030        | SPECIFIC GRAVITY WAS DONE VIA DIPSTICK WHICH ONLY MEASURES UPTO 1.0303,SPECIFIC GRAVOTY WAS NOT PERFORMED ON A REFRACTOMETER.                                                        |
|         |         | 24SEP2009 | 019        | 15 MINUTE SCAN WAS DELAYED DUE TO DIFFICULTY WITH BLOOD DRAW.                                                                                                                        |
|         | 302     | 07JAN2010 | 018<br>029 | 30 MINUTE PROCEDURES WERE NOT DONE DUE TO SUBJECT BEING IN SCANNER DURING THE TIME POINT.<br>DAY 06 PHYSICAL EXAMINATION NOT DONE DUE TO PI BEING AWAY FROM DUKE AT THIS TIME POINT. |

---

Listing 21  
Death Details

---

| Center | Patient | Date of Death | Time of Death | Primary Cause of Death | Associated Morbidity/Condition | Reported by | Was an Autopsy Performed? |
|--------|---------|---------------|---------------|------------------------|--------------------------------|-------------|---------------------------|
|--------|---------|---------------|---------------|------------------------|--------------------------------|-------------|---------------------------|

---

There were no deaths reported

Table 1  
Summary of Eligibility and Treatment Status

All Patients (N = 8)

---

|                                         | I-131-CLR1404<br>N (%) |
|-----------------------------------------|------------------------|
| Number Enrolled                         | 8                      |
| Number Treated                          | 8 (100.0%)             |
| Number Meeting all Study Entry Criteria | 3 ( 37.5%)             |
| Number Included in Safety Population    | 8 (100.0%)             |
| Number Completing Study                 | 8 (100.0%)             |
| Early Termination                       | 0 ( 0.0%)              |
| Patient Withdrawal of Consent           | 0 ( 0.0%)              |
| Disease Progression                     | 0 ( 0.0%)              |
| Adverse Event/Unacceptable Toxicity     | 0 ( 0.0%)              |
| Lost to Follow-up                       | 0 ( 0.0%)              |
| Patient Pregnant or Breastfeeding       | 0 ( 0.0%)              |
| Investigator Decision                   | 0 ( 0.0%)              |
| Other Reason                            | 0 ( 0.0%)              |

---

Source Listings: 1, 2, 3, 8, 19

Note: Percentages are determined from a denominator of all patients enrolled for the number treated, meeting all study entry criteria and included in the safety population, and determined from a denominator of the number of patients in the safety population for the remaining categories.

Note: Three patients did not satisfy all criteria as samples for INR were not drawn at screening.

Table 2  
Summary of Demographics and Baseline Characteristics

Safety Population (N = 8)

| Characteristic                            | I-131-CLR1404<br>N (%) |
|-------------------------------------------|------------------------|
| Gender N (%)                              |                        |
| Male                                      | 6 ( 75.0%)             |
| Female                                    | 2 ( 25.0%)             |
| Ethnicity N (%) [a]                       |                        |
| Hispanic or Latino                        | 1 ( 12.5%)             |
| Multi-Racial                              | 0 ( 0.0%)              |
| Other                                     | 0 ( 0.0%)              |
| Race N (%) [a]                            |                        |
| American Indian or Alaska Native          | 0 ( 0.0%)              |
| Asian                                     | 0 ( 0.0%)              |
| Black or African American                 | 1 ( 12.5%)             |
| Native Hawaiian or Other Pacific Islander | 0 ( 0.0%)              |
| White                                     | 6 ( 75.0%)             |
| Other                                     | 0 ( 0.0%)              |
| Age (Years)                               |                        |
| N                                         | 8                      |
| Mean                                      | 59.5                   |
| Std Dev                                   | 8.75                   |
| Median                                    | 59.0                   |
| Range                                     | (46, 71)               |

Source Listing: 4

Note: All percentages are determined from a denominator of all patients in the safety population.

[a] For each patient, either an ethnicity category or a race category was recorded.

Table 3  
Summary of Cancer Therapy History and Medical History  
Safety Population (N = 8)

---

|                                            | I-131-CLR1404<br>N (%) |
|--------------------------------------------|------------------------|
| Patients with Medical/Surgical History [a] | 8 (100.0%)             |
| Prior Medical/Surgical History             | 8 (100.0%)             |
| Ongoing Medical/Surgical History           | 8 (100.0%)             |
| Patients with Prior Radiation Therapy      | 2 ( 25.0%)             |
| Number of Radiation Therapy Cycles         | 8                      |
| N                                          | 8                      |
| Mean                                       | 0.3                    |
| Std Dev                                    | 0.46                   |
| Median                                     | 0.0                    |
| Range                                      | ( 0, 1)                |

---

Source Listings: 5, 6.1

Note: All percentages are determined from a denominator of all patients in the safety population.

[a] Patients can be included in more than one category.

Note: Patients with no prior radiation therapy are included as zero cycles in the summary.

Table 4  
Summary of Total Injected Dose Activity  
Safety Population (N = 8)

---

|                                    |         | I-131-CLR1404<br>N (%) |
|------------------------------------|---------|------------------------|
| Total Injected Dose Activity (mCi) | N       | 8                      |
|                                    | Mean    | 10.2                   |
|                                    | Std Dev | 0.45                   |
|                                    | Median  | 10.2                   |
|                                    | Range   | ( 9, 11)               |
| Dose Delivered as Per Protocol     |         | 8 (100.0%)             |
| Dose not Delivered as Per Protocol |         | 0 ( 0.0%)              |
| Adverse Event                      |         | 0 ( 0.0%)              |
| Patient Non-Compliance             |         | 0 ( 0.0%)              |
| Withdrawal of Consent              |         | 0 ( 0.0%)              |
| Technical Complications            |         | 0 ( 0.0%)              |
| Other Reason                       |         | 0 ( 0.0%)              |

---

Source Listing: 8

Note: Percentage of patients with dose delivered as per protocol is determined from a denominator of the safety population. All other percentages are determined from a denominator of all patients with dose not delivered as per protocol.

[a] Patients can be included in more than one category.

Table 5  
 Summary of Treatment Emergent Adverse Events

Safety Population (N= 8)

| System Organ Class                                   | Preferred Term    | I-131-CLR1404<br>N (%) | Events |
|------------------------------------------------------|-------------------|------------------------|--------|
| NUMBER OF PATIENTS WITH ADVERSE EVENTS               |                   | 7 (87.5%)              | 19     |
| GENERAL DISORDERS AND ADMINISTRATION SITE CONDITIONS | ALL               | 5 (62.5%)              | 5      |
|                                                      | FATIGUE           | 4 (50.0%)              | 4      |
|                                                      | OEDEMA PERIPHERAL | 1 (12.5%)              | 1      |
| SKIN AND SUBCUTANEOUS TISSUE DISORDERS               | ALL               | 3 (37.5%)              | 4      |
|                                                      | ERYTHEMA          | 2 (25.0%)              | 2      |
|                                                      | SKIN ULCER        | 1 (12.5%)              | 2      |
| INFECTIONS AND INFESTATIONS                          | ALL               | 3 (37.5%)              | 3      |
|                                                      | ERYSIPELAS        | 1 (12.5%)              | 1      |
|                                                      | HORDEOLUM         | 1 (12.5%)              | 1      |
|                                                      | SIALOADENITIS     | 1 (12.5%)              | 1      |
| RESPIRATORY, THORACIC AND MEDIASTINAL DISORDERS      | ALL               | 2 (25.0%)              | 2      |
|                                                      | NASAL CONGESTION  | 1 (12.5%)              | 1      |
|                                                      | WHEEZING          | 1 (12.5%)              | 1      |

Source Listing: 9

Note: All percentages are determined from a denominator of all patients in the safety population.

If a patient has more than one event with a given preferred term, it is counted for each event in the count of events for that preferred term, and counted once for that patient in the count of patients for that preferred term. Similarly if a patient has more than one event with a given system organ class, it is counted for each event in the count of events for that system organ class, and counted once for that patient in the count of patients for that preferred term.

Table 5  
Summary of Treatment Emergent Adverse Events

Safety Population (N= 8)

| System Organ Class                              | Preferred Term                         | I-131-CLR1404<br>N (%) | Events |
|-------------------------------------------------|----------------------------------------|------------------------|--------|
| GASTROINTESTINAL DISORDERS                      | ALL                                    | 2 (25.0%)              | 2      |
|                                                 | CONSTIPATION                           | 1 (12.5%)              | 1      |
|                                                 | DIARRHOEA                              | 1 (12.5%)              | 1      |
| INVESTIGATIONS                                  | ALL                                    | 1 (12.5%)              | 2      |
|                                                 | BLOOD PRESSURE DECREASED               | 1 (12.5%)              | 1      |
|                                                 | GAMMA-GLUTAMYLTRANSFERASE<br>INCREASED | 1 (12.5%)              | 1      |
|                                                 |                                        |                        |        |
| MUSCULOSKELETAL AND CONNECTIVE TISSUE DISORDERS | ALL                                    | 1 (12.5%)              | 1      |
|                                                 | BACK PAIN                              | 1 (12.5%)              | 1      |

Source Listing: 9

Note: All percentages are determined from a denominator of all patients in the safety population.

If a patient has more than one event with a given preferred term, it is counted for each event in the count of events for that preferred term, and counted once for that patient in the count of patients for that preferred term. Similarly if a patient has more than one event with a given system organ class, it is counted for each event in the count of events for that system organ class, and counted once for that patient in the count of patients for that preferred term.



Table 6  
 Summary of Treatment Emergent Adverse Events by Worst Severity

Safety Population (N= 8)

| System Organ Class                                   | Preferred Term    | CTCAE Grade | I-131-CLR1404 N (%) | Events |
|------------------------------------------------------|-------------------|-------------|---------------------|--------|
| GENERAL DISORDERS AND ADMINISTRATION SITE CONDITIONS | ALL               | 1           | 5 (62.5%)           | 5      |
|                                                      |                   | 2           | 0 ( 0.0%)           | 0      |
|                                                      |                   | 3           | 0 ( 0.0%)           | 0      |
|                                                      |                   | 4           | 0 ( 0.0%)           | 0      |
|                                                      |                   | 5           | 0 ( 0.0%)           | 0      |
|                                                      | FATIGUE           | 1           | 4 (50.0%)           | 4      |
|                                                      |                   | 2           | 0 ( 0.0%)           | 0      |
|                                                      |                   | 3           | 0 ( 0.0%)           | 0      |
|                                                      |                   | 4           | 0 ( 0.0%)           | 0      |
|                                                      |                   | 5           | 0 ( 0.0%)           | 0      |
|                                                      | OEDEMA PERIPHERAL | 1           | 1 (12.5%)           | 1      |
|                                                      |                   | 2           | 0 ( 0.0%)           | 0      |
|                                                      |                   | 3           | 0 ( 0.0%)           | 0      |
|                                                      |                   | 4           | 0 ( 0.0%)           | 0      |
|                                                      |                   | 5           | 0 ( 0.0%)           | 0      |

Source Listing: 9

Note: All percentages are determined from a denominator of all patients in the safety population.

If a patient has more than one event with a given preferred term, it is counted for each event in the count of events for that preferred Term/CTCAE grade, and counted once for that patient in the count of patients for that preferred term/CTCAE grade. Similarly if a patient has more than one event with a given system organ class/CTCAE grade, it is counted for each event in the count of events for that system organ class/CTCAE grade, and counted once for that patient in the count of patients for that preferred term/CTCAE grade. Only the worst CTCAE grade for each term is summarized.

Table 6  
 Summary of Treatment Emergent Adverse Events by Worst Severity

Safety Population (N= 8)

| System Organ Class                     | Preferred Term | CTCAE Grade | I-131-CLR1404 N (%) | Events |
|----------------------------------------|----------------|-------------|---------------------|--------|
| SKIN AND SUBCUTANEOUS TISSUE DISORDERS | ALL            | 1           | 3 (37.5%)           | 4      |
|                                        |                | 2           | 0 (0.0%)            | 0      |
|                                        |                | 3           | 0 (0.0%)            | 0      |
|                                        |                | 4           | 0 (0.0%)            | 0      |
|                                        |                | 5           | 0 (0.0%)            | 0      |
|                                        | ERYTHEMA       | 1           | 2 (25.0%)           | 2      |
|                                        |                | 2           | 0 (0.0%)            | 0      |
|                                        |                | 3           | 0 (0.0%)            | 0      |
|                                        |                | 4           | 0 (0.0%)            | 0      |
|                                        |                | 5           | 0 (0.0%)            | 0      |
|                                        | SKIN ULCER     | 1           | 1 (12.5%)           | 2      |
|                                        |                | 2           | 0 (0.0%)            | 0      |
|                                        |                | 3           | 0 (0.0%)            | 0      |
|                                        |                | 4           | 0 (0.0%)            | 0      |
|                                        |                | 5           | 0 (0.0%)            | 0      |

Source Listing: 9

Note: All percentages are determined from a denominator of all patients in the safety population.

If a patient has more than one event with a given preferred term, it is counted for each event in the count of events for that preferred Term/CTCAE grade, and counted once for that patient in the count of patients for that preferred term/CTCAE grade. Similarly if a patient has more than one event with a given system organ class/CTCAE grade, it is counted for each event in the count of events for that system organ class/CTCAE grade, and counted once for that patient in the count of patients for that preferred term/CTCAE grade. Only the worst CTCAE grade for each term is summarized.

Table 6  
 Summary of Treatment Emergent Adverse Events by Worst Severity

Safety Population (N= 8)

| System Organ Class          | Preferred Term | CTCAE Grade | I-131-CLR1404 N (%) | Events |
|-----------------------------|----------------|-------------|---------------------|--------|
| INFECTIONS AND INFESTATIONS | ALL            | 1           | 3 (37.5%)           | 3      |
|                             |                | 2           | 0 (0.0%)            | 0      |
|                             |                | 3           | 0 (0.0%)            | 0      |
|                             |                | 4           | 0 (0.0%)            | 0      |
|                             |                | 5           | 0 (0.0%)            | 0      |
|                             | ERYSIPELAS     | 1           | 1 (12.5%)           | 1      |
|                             |                | 2           | 0 (0.0%)            | 0      |
|                             |                | 3           | 0 (0.0%)            | 0      |
|                             |                | 4           | 0 (0.0%)            | 0      |
|                             |                | 5           | 0 (0.0%)            | 0      |
|                             | HORDEOLUM      | 1           | 1 (12.5%)           | 1      |
|                             |                | 2           | 0 (0.0%)            | 0      |
|                             |                | 3           | 0 (0.0%)            | 0      |
|                             |                | 4           | 0 (0.0%)            | 0      |
|                             |                | 5           | 0 (0.0%)            | 0      |
|                             | SIALOADENITIS  | 1           | 1 (12.5%)           | 1      |
|                             |                | 2           | 0 (0.0%)            | 0      |
|                             |                | 3           | 0 (0.0%)            | 0      |
|                             |                | 4           | 0 (0.0%)            | 0      |
|                             |                | 5           | 0 (0.0%)            | 0      |

Source Listing: 9

Note: All percentages are determined from a denominator of all patients in the safety population.

If a patient has more than one event with a given preferred term, it is counted for each event in the count of events for that preferred term/CTCAE grade, and counted once for that patient in the count of patients for that preferred term/CTCAE grade. Similarly if a patient has more than one event with a given system organ class/CTCAE grade, it is counted for each event in the count of events for that system organ class/CTCAE grade, and counted once for that patient in the count of patients for that preferred term/CTCAE grade. Only the worst CTCAE grade for each term is summarized.

Table 6  
 Summary of Treatment Emergent Adverse Events by Worst Severity

| Safety Population (N= 8)                        |                  |             |                     |        |
|-------------------------------------------------|------------------|-------------|---------------------|--------|
| System Organ Class                              | Preferred Term   | CTCAE Grade | I-131-CLR1404 N (%) | Events |
| RESPIRATORY, THORACIC AND MEDIASTINAL DISORDERS | ALL              | 1           | 2 (25.0%)           | 2      |
|                                                 |                  | 2           | 0 ( 0.0%)           | 0      |
|                                                 |                  | 3           | 0 ( 0.0%)           | 0      |
|                                                 |                  | 4           | 0 ( 0.0%)           | 0      |
|                                                 |                  | 5           | 0 ( 0.0%)           | 0      |
|                                                 | NASAL CONGESTION | 1           | 1 (12.5%)           | 1      |
|                                                 |                  | 2           | 0 ( 0.0%)           | 0      |
|                                                 |                  | 3           | 0 ( 0.0%)           | 0      |
|                                                 |                  | 4           | 0 ( 0.0%)           | 0      |
|                                                 |                  | 5           | 0 ( 0.0%)           | 0      |
|                                                 | WHEEZING         | 1           | 1 (12.5%)           | 1      |
|                                                 |                  | 2           | 0 ( 0.0%)           | 0      |
|                                                 |                  | 3           | 0 ( 0.0%)           | 0      |
|                                                 |                  | 4           | 0 ( 0.0%)           | 0      |
|                                                 |                  | 5           | 0 ( 0.0%)           | 0      |

Source Listing: 9

Note: All percentages are determined from a denominator of all patients in the safety population.

If a patient has more than one event with a given preferred term, it is counted for each event in the count of events for that preferred Term/CTCAE grade, and counted once for that patient in the count of patients for that preferred term/CTCAE grade. Similarly if a patient has more than one event with a given system organ class/CTCAE grade, it is counted for each event in the count of events for that system organ class/CTCAE grade, and counted once for that patient in the count of patients for that preferred term/CTCAE grade. Only the worst CTCAE grade for each term is summarized.

Table 6  
 Summary of Treatment Emergent Adverse Events by Worst Severity

Safety Population (N= 8)

| System Organ Class         | Preferred Term | CTCAE Grade | I-131-CLR1404 N (%) | Events |
|----------------------------|----------------|-------------|---------------------|--------|
| GASTROINTESTINAL DISORDERS | ALL            | 1           | 2 (25.0%)           | 2      |
|                            |                | 2           | 0 ( 0.0%)           | 0      |
|                            |                | 3           | 0 ( 0.0%)           | 0      |
|                            |                | 4           | 0 ( 0.0%)           | 0      |
|                            |                | 5           | 0 ( 0.0%)           | 0      |
|                            | CONSTIPATION   | 1           | 1 (12.5%)           | 1      |
|                            |                | 2           | 0 ( 0.0%)           | 0      |
|                            |                | 3           | 0 ( 0.0%)           | 0      |
|                            |                | 4           | 0 ( 0.0%)           | 0      |
|                            |                | 5           | 0 ( 0.0%)           | 0      |
|                            | DIARRHOEA      | 1           | 1 (12.5%)           | 1      |
|                            |                | 2           | 0 ( 0.0%)           | 0      |
|                            |                | 3           | 0 ( 0.0%)           | 0      |
|                            |                | 4           | 0 ( 0.0%)           | 0      |
|                            |                | 5           | 0 ( 0.0%)           | 0      |

Source Listing: 9

Note: All percentages are determined from a denominator of all patients in the safety population.

If a patient has more than one event with a given preferred term, it is counted for each event in the count of events for that preferred Term/CTCAE grade, and counted once for that patient in the count of patients for that preferred term/CTCAE grade. Similarly if a patient has more than one event with a given system organ class/CTCAE grade, it is counted for each event in the count of events for that system organ class/CTCAE grade, and counted once for that patient in the count of patients for that preferred term/CTCAE grade. Only the worst CTCAE grade for each term is summarized.

Table 6  
 Summary of Treatment Emergent Adverse Events by Worst Severity

Safety Population (N= 8)

| System Organ Class | Preferred Term                      | CTCAE Grade | I-131-CLR1404 N (%) | Events |
|--------------------|-------------------------------------|-------------|---------------------|--------|
| INVESTIGATIONS     | ALL                                 | 1           | 1 (12.5%)           | 1      |
|                    |                                     | 2           | 1 (12.5%)           | 1      |
|                    |                                     | 3           | 0 ( 0.0%)           | 0      |
|                    |                                     | 4           | 0 ( 0.0%)           | 0      |
|                    |                                     | 5           | 0 ( 0.0%)           | 0      |
|                    | BLOOD PRESSURE DECREASED            | 1           | 1 (12.5%)           | 1      |
|                    |                                     | 2           | 0 ( 0.0%)           | 0      |
|                    |                                     | 3           | 0 ( 0.0%)           | 0      |
|                    |                                     | 4           | 0 ( 0.0%)           | 0      |
|                    |                                     | 5           | 0 ( 0.0%)           | 0      |
|                    | GAMMA-GLUTAMYLTRANSFERASE INCREASED | 1           | 0 ( 0.0%)           | 0      |
|                    |                                     | 2           | 1 (12.5%)           | 1      |
|                    |                                     | 3           | 0 ( 0.0%)           | 0      |
|                    |                                     | 4           | 0 ( 0.0%)           | 0      |
|                    |                                     | 5           | 0 ( 0.0%)           | 0      |

Source Listing: 9

Note: All percentages are determined from a denominator of all patients in the safety population.

If a patient has more than one event with a given preferred term, it is counted for each event in the count of events for that preferred Term/CTCAE grade, and counted once for that patient in the count of patients for that preferred term/CTCAE grade. Similarly if a patient has more than one event with a given system organ class/CTCAE grade, it is counted for each event in the count of events for that system organ class/CTCAE grade, and counted once for that patient in the count of patients for that preferred term/CTCAE grade. Only the worst CTCAE grade for each term is summarized.

Table 6  
 Summary of Treatment Emergent Adverse Events by Worst Severity

Safety Population (N= 8)

| System Organ Class                              | Preferred Term | CTCAE Grade | I-131-CLR1404 N (%) | Events |
|-------------------------------------------------|----------------|-------------|---------------------|--------|
| MUSCULOSKELETAL AND CONNECTIVE TISSUE DISORDERS | ALL            | 1           | 0 ( 0.0%)           | 0      |
|                                                 |                | 2           | 1 (12.5%)           | 1      |
|                                                 |                | 3           | 0 ( 0.0%)           | 0      |
|                                                 |                | 4           | 0 ( 0.0%)           | 0      |
|                                                 |                | 5           | 0 ( 0.0%)           | 0      |
|                                                 | BACK PAIN      | 1           | 0 ( 0.0%)           | 0      |
|                                                 |                | 2           | 1 (12.5%)           | 1      |
|                                                 |                | 3           | 0 ( 0.0%)           | 0      |
|                                                 |                | 4           | 0 ( 0.0%)           | 0      |
|                                                 |                | 5           | 0 ( 0.0%)           | 0      |

Source Listing: 9

Note: All percentages are determined from a denominator of all patients in the safety population.

If a patient has more than one event with a given preferred term, it is counted for each event in the count of events for that preferred Term/CTCAE grade, and counted once for that patient in the count of patients for that preferred term/CTCAE grade. Similarly if a patient has more than one event with a given system organ class/CTCAE grade, it is counted for each event in the count of events for that system organ class/CTCAE grade, and counted once for that patient in the count of patients for that preferred term/CTCAE grade. Only the worst CTCAE grade for each term is summarized.

Table 7  
 Summary of Treatment Emergent Adverse Events by Relationship to Study Drug

Safety Population (N= 8)

| System Organ Class                                   | Preferred Term    | Relationship | I-131-CLR1404<br>N (%) | Events |
|------------------------------------------------------|-------------------|--------------|------------------------|--------|
| GENERAL DISORDERS AND ADMINISTRATION SITE CONDITIONS | ALL               | Related      | 3 (37.5%)              | 3      |
|                                                      |                   | Not Related  | 2 (25.0%)              | 2      |
|                                                      | FATIGUE           | Related      | 3 (37.5%)              | 3      |
|                                                      |                   | Not Related  | 1 (12.5%)              | 1      |
|                                                      | OEDEMA PERIPHERAL | Related      | 0 ( 0.0%)              | 0      |
|                                                      |                   | Not Related  | 1 (12.5%)              | 1      |
| SKIN AND SUBCUTANEOUS TISSUE DISORDERS               | ALL               | Related      | 0 ( 0.0%)              | 0      |
|                                                      |                   | Not Related  | 3 (37.5%)              | 4      |
|                                                      | ERYTHEMA          | Related      | 0 ( 0.0%)              | 0      |
|                                                      |                   | Not Related  | 2 (25.0%)              | 2      |
|                                                      | SKIN ULCER        | Related      | 0 ( 0.0%)              | 0      |
|                                                      |                   | Not Related  | 1 (12.5%)              | 2      |
| INFECTIONS AND INFESTATIONS                          | ALL               | Related      | 1 (12.5%)              | 1      |
|                                                      |                   | Not Related  | 2 (25.0%)              | 2      |
|                                                      | ERYSIPELAS        | Related      | 0 ( 0.0%)              | 0      |
|                                                      |                   | Not Related  | 1 (12.5%)              | 1      |
|                                                      | HORDEOLUM         | Related      | 0 ( 0.0%)              | 0      |
|                                                      |                   | Not Related  | 1 (12.5%)              | 1      |
|                                                      | SIALOADENITIS     | Related      | 1 (12.5%)              | 1      |
|                                                      |                   | Not Related  | 0 ( 0.0%)              | 0      |
| RESPIRATORY, THORACIC AND MEDIASTINAL DISORDERS      | ALL               | Related      | 0 ( 0.0%)              | 0      |
|                                                      |                   | Not Related  | 2 (25.0%)              | 2      |
|                                                      | NASAL CONGESTION  | Related      | 0 ( 0.0%)              | 0      |
|                                                      |                   | Not Related  | 1 (12.5%)              | 1      |

Source Listing: 9

Note: All percentages are determined from a denominator of all patients in the safety population.

If a patient has more than one event with a given preferred term, it is counted for each event in the count of events for that preferred term, and counted once for that patient in the count of patients for that preferred term. Similarly if a patient has more than one event with a given system organ class, it is counted for each event in the count of events for that system organ class, and counted once for that patient in the count of patients for that preferred term.



Table 7  
 Summary of Treatment Emergent Adverse Events by Relationship to Study Drug

Safety Population (N= 8)

| System Organ Class                              | Preferred Term                      | Relationship | I-131-CLR1404<br>N (%) | Events |
|-------------------------------------------------|-------------------------------------|--------------|------------------------|--------|
| RESPIRATORY, THORACIC AND MEDIASTINAL DISORDERS | WHEEZING                            | Related      | 0 ( 0.0%)              | 0      |
|                                                 |                                     | Not Related  | 1 (12.5%)              | 1      |
| GASTROINTESTINAL DISORDERS                      | ALL                                 | Related      | 1 (12.5%)              | 1      |
|                                                 |                                     | Not Related  | 1 (12.5%)              | 1      |
|                                                 | CONSTIPATION                        | Related      | 1 (12.5%)              | 1      |
|                                                 |                                     | Not Related  | 0 ( 0.0%)              | 0      |
|                                                 | DIARRHOEA                           | Related      | 0 ( 0.0%)              | 0      |
|                                                 |                                     | Not Related  | 1 (12.5%)              | 1      |
| INVESTIGATIONS                                  | ALL                                 | Related      | 0 ( 0.0%)              | 0      |
|                                                 |                                     | Not Related  | 1 (12.5%)              | 2      |
|                                                 | BLOOD PRESSURE DECREASED            | Related      | 0 ( 0.0%)              | 0      |
|                                                 |                                     | Not Related  | 1 (12.5%)              | 1      |
|                                                 | GAMMA-GLUTAMYLTRANSFERASE INCREASED | Related      | 0 ( 0.0%)              | 0      |
|                                                 |                                     | Not Related  | 1 (12.5%)              | 1      |
| MUSCULOSKELETAL AND CONNECTIVE TISSUE DISORDERS | ALL                                 | Related      | 0 ( 0.0%)              | 0      |
|                                                 |                                     | Not Related  | 1 (12.5%)              | 1      |
|                                                 | BACK PAIN                           | Related      | 0 ( 0.0%)              | 0      |
|                                                 |                                     | Not Related  | 1 (12.5%)              | 1      |

Source Listing: 9

Note: All percentages are determined from a denominator of all patients in the safety population.

If a patient has more than one event with a given preferred term, it is counted for each event in the count of events for that preferred term, and counted once for that patient in the count of patients for that preferred term. Similarly if a patient has more than one event with a given system organ class, it is counted for each event in the count of events for that system organ class, and counted once for that patient in the count of patients for that preferred term.

Table 8  
Summary of Treatment Emergent Serious Adverse Events

Safety Population (N= 8)

---

| System Organ Class | Preferred Term | I-131-CLR1404<br>N (%) | Events |
|--------------------|----------------|------------------------|--------|
|--------------------|----------------|------------------------|--------|

---

There were no Treatment Emergent Serious Adverse Events reported

---

Source Listing: 9

Note: All percentages are determined from a denominator of all patients in the safety population.

If a patient has more than one event with a given preferred term, it is counted for each event in the count of events for that preferred term, and counted once for that patient in the count of patients for that preferred term. Similarly if a patient has more than one event with a given system organ class, it is counted for each event in the count of events for that system organ class, and counted once for that patient in the count of patients for that preferred term.

Table 9  
Summary of Treatment Emergent Adverse Events Leading to Termination of Study Drug

Safety Population (N= 8)

---

| System Organ Class | Preferred Term | I-131-CLR1404<br>N (%) | Events |
|--------------------|----------------|------------------------|--------|
|--------------------|----------------|------------------------|--------|

---

There were no Treatment Emergent Adverse Events Leading to Termination of Study Drug

---

Source Listing: 9

Note: All percentages are determined from a denominator of all patients in the safety population.

If a patient has more than one event with a given preferred term, it is counted for each event in the count of events for that preferred term, and counted once for that patient in the count of patients for that preferred term. Similarly if a patient has more than one event with a given system organ class, it is counted for each event in the count of events for that system organ class, and counted once for that patient in the count of patients for that preferred term.

SAS program path: U:\Project Folders - UK\Collectar\XVO08001\Statistics\SASProgs\t9.sas TThampy

08APR2010 9:39

Table 10  
Summary of Dose Limiting Toxicities [a]

Safety Population (N= 8)

| System Organ Class | Preferred Term | I-131-CLR1404<br>N (%) | Events |
|--------------------|----------------|------------------------|--------|
|--------------------|----------------|------------------------|--------|

There were no Dose Limiting Toxicities

Source Listing: 9

Note: All percentages are determined from a denominator of all patients in the safety population.

If a patient has more than one event with a given preferred term, it is counted for each event in the count of events for that preferred term, and counted once for that patient in the count of patients for that preferred term. Similarly if a patient has more than one event with a given system organ class, it is counted for each event in the count of events for that system organ class, and counted once for that patient in the count of patients for that preferred term.

[a] Dose limiting toxicities are defined for hematological events as any CTCAE grade 4 toxicity (except neutropenia without concurrent fever which had to be present for at least 7 days), CTCAE grade 3 neutropenia with fever or CTCAE grade 3 thrombocytopenia associated with bleeding. Dose limiting toxicities are defined for non-hematological events as any CTCAE grade 3 toxicity despite adequate supportive care (supportive care limited to nausea, vomiting and diarrhea only) or any CTCAE grade 4 toxicity

Table 11.1  
 Summary of Laboratory Data - Quantitative  
 Safety Population (N = 8)

| Laboratory Type    | Parameter                              | Visit     | I-131-CLR1404 |         |         |         |                   |
|--------------------|----------------------------------------|-----------|---------------|---------|---------|---------|-------------------|
|                    |                                        |           | N             | Mean    | Std Dev | Median  | Range             |
| Clinical Chemistry | Sodium (mEq/L)                         | Screening | 8             | 138.875 | 1.1260  | 139.000 | ( 137.00, 140.00) |
|                    |                                        | Baseline  | 6             | 138.500 | 1.6432  | 138.500 | ( 136.00, 141.00) |
|                    |                                        | Day 6     | 8             | 137.250 | 2.7124  | 137.000 | ( 133.00, 140.00) |
|                    |                                        | Day 14    | 7             | 138.000 | 2.1602  | 138.000 | ( 134.00, 141.00) |
|                    |                                        | Day 30    | 7             | 136.857 | 2.0354  | 137.000 | ( 134.00, 140.00) |
|                    |                                        | Day 42    | 7             | 137.143 | 1.5736  | 137.000 | ( 135.00, 139.00) |
|                    | Sodium (mEq/L) Change from Baseline    | Day 6     | 8             | -1.250  | 2.3755  | -1.500  | ( -4.00, 2.00)    |
|                    |                                        | Day 14    | 7             | -0.143  | 2.1157  | -1.000  | ( -2.00, 4.00)    |
|                    |                                        | Day 30    | 7             | -1.286  | 1.7995  | -1.000  | ( -4.00, 1.00)    |
|                    |                                        | Day 42    | 7             | -1.000  | 1.6330  | -1.000  | ( -4.00, 1.00)    |
|                    | Potassium (mEq/L)                      | Screening | 8             | 4.213   | 0.3603  | 4.000   | ( 3.90, 4.80)     |
|                    |                                        | Baseline  | 6             | 4.383   | 0.6706  | 4.250   | ( 3.40, 5.40)     |
|                    |                                        | Day 6     | 8             | 4.163   | 0.4749  | 4.200   | ( 3.50, 4.90)     |
|                    |                                        | Day 14    | 7             | 4.186   | 0.2545  | 4.100   | ( 3.80, 4.50)     |
|                    |                                        | Day 30    | 7             | 4.171   | 0.3402  | 4.100   | ( 3.90, 4.90)     |
|                    |                                        | Day 42    | 7             | 4.314   | 0.5178  | 4.100   | ( 3.70, 5.10)     |
|                    | Potassium (mEq/L) Change from Baseline | Day 6     | 8             | -0.175  | 0.3808  | -0.050  | ( -0.80, 0.30)    |
|                    |                                        | Day 14    | 7             | 0.000   | 0.3317  | -0.100  | ( -0.40, 0.50)    |
|                    |                                        | Day 30    | 7             | -0.014  | 0.2968  | -0.100  | ( -0.30, 0.50)    |
|                    |                                        | Day 42    | 7             | 0.129   | 0.4990  | 0.000   | ( -0.50, 0.90)    |

Source Listing: 10.1, 10.2, 10.3, 10.4

SAS program path: U:\Project Folders - UK\Collectar\XVO08001\Statistics\SASProgs\T11\_1.sas SSasidharapanickar

08APR2010 10:16

Table 11.1  
 Summary of Laboratory Data - Quantitative  
 Safety Population (N = 8)

| Laboratory Type    | Parameter                                  | Visit     | I-131-CLR1404 |        |         |        |                 |  |
|--------------------|--------------------------------------------|-----------|---------------|--------|---------|--------|-----------------|--|
|                    |                                            |           | N             | Mean   | Std Dev | Median | Range           |  |
| Clinical Chemistry | Total Protein(G/DL)                        | Screening | 8             | 6.925  | 0.5175  | 6.750  | ( 6.20, 7.90)   |  |
|                    |                                            | Baseline  | 6             | 6.933  | 0.5820  | 6.950  | ( 6.10, 7.70)   |  |
|                    |                                            | Day 6     | 8             | 6.813  | 0.2100  | 6.800  | ( 6.50, 7.10)   |  |
|                    |                                            | Day 14    | 7             | 6.614  | 0.4059  | 6.500  | ( 6.20, 7.30)   |  |
|                    |                                            | Day 30    | 7             | 6.900  | 0.3606  | 7.000  | ( 6.50, 7.50)   |  |
|                    |                                            | Day 42    | 7             | 6.829  | 0.3302  | 6.700  | ( 6.40, 7.20)   |  |
|                    | Total Protein(G/DL) Change from Baseline   | Day 6     | 8             | -0.100 | 0.3546  | -0.100 | ( -0.70, 0.40)  |  |
|                    |                                            | Day 14    | 7             | -0.229 | 0.2059  | -0.300 | ( -0.40, 0.10)  |  |
|                    |                                            | Day 30    | 7             | 0.057  | 0.3101  | 0.100  | ( -0.50, 0.40)  |  |
|                    |                                            | Day 42    | 7             | -0.014 | 0.3934  | 0.100  | ( -0.50, 0.60)  |  |
|                    | Bicarbonatate (mEq/L)                      | Screening | 8             | 26.000 | 2.8284  | 27.000 | ( 21.00, 29.00) |  |
|                    |                                            | Baseline  | 6             | 25.500 | 3.5637  | 25.500 | ( 21.00, 31.00) |  |
|                    |                                            | Day 6     | 8             | 25.250 | 2.7124  | 25.000 | ( 22.00, 30.00) |  |
|                    |                                            | Day 14    | 7             | 26.000 | 3.0000  | 27.000 | ( 22.00, 30.00) |  |
|                    |                                            | Day 30    | 7             | 26.286 | 3.2514  | 26.000 | ( 21.00, 30.00) |  |
|                    |                                            | Day 42    | 7             | 25.429 | 3.5051  | 26.000 | ( 21.00, 29.00) |  |
|                    | Bicarbonatate (mEq/L) Change from Baseline | Day 6     | 8             | -0.250 | 2.0529  | -1.000 | ( -3.00, 3.00)  |  |
|                    |                                            | Day 14    | 7             | 0.714  | 2.5635  | 2.000  | ( -4.00, 3.00)  |  |
|                    |                                            | Day 30    | 7             | 1.000  | 2.5820  | 1.000  | ( -2.00, 6.00)  |  |
|                    |                                            | Day 42    | 7             | 0.143  | 2.3401  | 0.000  | ( -3.00, 4.00)  |  |

Source Listing: 10.1, 10.2, 10.3, 10.4

Table 11.1  
 Summary of Laboratory Data - Quantitative  
 Safety Population (N = 8)

| Laboratory Type    | Parameter                            | Visit     | I-131-CLR1404 |         |         |         |                   |
|--------------------|--------------------------------------|-----------|---------------|---------|---------|---------|-------------------|
|                    |                                      |           | N             | Mean    | Std Dev | Median  | Range             |
| Clinical Chemistry | BUN (mg/dL)                          | Screening | 8             | 16.750  | 6.8191  | 16.500  | ( 5.00, 27.00)    |
|                    |                                      | Baseline  | 6             | 19.333  | 8.2865  | 19.500  | ( 7.00, 28.00)    |
|                    |                                      | Day 6     | 8             | 16.000  | 6.9693  | 16.500  | ( 5.00, 27.00)    |
|                    |                                      | Day 14    | 7             | 15.286  | 6.1023  | 14.000  | ( 5.00, 24.00)    |
|                    |                                      | Day 30    | 7             | 16.000  | 5.5976  | 17.000  | ( 5.00, 22.00)    |
|                    |                                      | Day 42    | 7             | 15.571  | 6.6045  | 14.000  | ( 7.00, 27.00)    |
|                    | BUN (mg/dL) Change from Baseline     | Day 6     | 8             | -2.375  | 2.8253  | -1.500  | ( -9.00, 0.00)    |
|                    |                                      | Day 14    | 7             | -1.714  | 3.0394  | -1.000  | ( -7.00, 2.00)    |
|                    |                                      | Day 30    | 7             | -1.000  | 4.2817  | -1.000  | ( -6.00, 7.00)    |
|                    |                                      | Day 42    | 7             | -1.429  | 2.5071  | -1.000  | ( -6.00, 2.00)    |
|                    | Glucose (mg/dL)                      | Screening | 8             | 105.875 | 28.6727 | 93.000  | ( 81.00, 161.00)  |
|                    |                                      | Baseline  | 6             | 112.000 | 22.6892 | 105.000 | ( 94.00, 157.00)  |
|                    |                                      | Day 6     | 8             | 115.250 | 37.3698 | 105.000 | ( 77.00, 200.00)  |
|                    |                                      | Day 14    | 7             | 103.143 | 39.8641 | 93.000  | ( 72.00, 190.00)  |
|                    |                                      | Day 30    | 7             | 100.143 | 20.2355 | 91.000  | ( 85.00, 144.00)  |
|                    |                                      | Day 42    | 7             | 125.143 | 53.1960 | 99.000  | ( 86.00, 205.00)  |
|                    | Glucose (mg/dL) Change from Baseline | Day 6     | 8             | 9.750   | 21.7239 | 5.500   | ( -25.00, 43.00)  |
|                    |                                      | Day 14    | 7             | -2.000  | 20.3142 | -1.000  | ( -24.00, 33.00)  |
|                    |                                      | Day 30    | 7             | -5.000  | 8.9443  | -5.000  | ( -17.00, 5.00)   |
|                    |                                      | Day 42    | 7             | 20.000  | 45.7530 | 13.000  | ( -22.00, 111.00) |

Source Listing: 10.1, 10.2, 10.3, 10.4

SAS program path: U:\Project Folders - UK\Collectar\XVO08001\Statistics\SASProgs\T11\_1.sas SSasidharapanickar

08APR2010 10:16

Table 11.1  
 Summary of Laboratory Data - Quantitative  
 Safety Population (N = 8)

| Laboratory Type    | Parameter                            | Visit     | I-131-CLR1404 |        |         |        |                   |
|--------------------|--------------------------------------|-----------|---------------|--------|---------|--------|-------------------|
|                    |                                      |           | N             | Mean   | Std Dev | Median | Range             |
| Clinical Chemistry | GGT (U/L)                            | Screening | 8             | 41.125 | 22.6743 | 44.000 | ( 11.00, 68.00)   |
|                    |                                      | Baseline  | 7             | 44.143 | 17.9018 | 49.000 | ( 22.00, 68.00)   |
|                    |                                      | Day 6     | 8             | 49.250 | 48.5673 | 39.500 | ( 8.00, 163.00)   |
|                    |                                      | Day 14    | 8             | 37.375 | 20.5631 | 33.000 | ( 12.00, 74.00)   |
|                    |                                      | Day 30    | 8             | 39.000 | 21.4609 | 36.000 | ( 12.00, 74.00)   |
|                    |                                      | Day 42    | 7             | 37.000 | 20.3388 | 32.000 | ( 18.00, 74.00)   |
|                    | GGT (U/L) Change from Baseline       | Day 6     | 8             | 9.250  | 38.0517 | -2.000 | ( -10.00, 103.00) |
|                    |                                      | Day 14    | 8             | -2.625 | 10.4326 | -0.500 | ( -17.00, 14.00)  |
|                    |                                      | Day 30    | 8             | -1.000 | 9.1807  | 0.000  | ( -19.00, 14.00)  |
|                    |                                      | Day 42    | 7             | -7.143 | 13.2342 | -4.000 | ( -27.00, 14.00)  |
|                    | Calcium (mg/dL)                      | Screening | 8             | 9.275  | 0.2493  | 9.300  | ( 8.80, 9.60)     |
|                    |                                      | Baseline  | 6             | 9.400  | 0.4243  | 9.350  | ( 9.00, 10.20)    |
|                    |                                      | Day 6     | 8             | 9.163  | 0.2722  | 9.200  | ( 8.80, 9.50)     |
|                    |                                      | Day 14    | 7             | 9.071  | 0.2812  | 9.000  | ( 8.70, 9.50)     |
|                    |                                      | Day 30    | 7             | 8.957  | 0.2699  | 8.900  | ( 8.50, 9.30)     |
|                    |                                      | Day 42    | 7             | 9.014  | 0.2795  | 8.900  | ( 8.70, 9.40)     |
|                    | Calcium (mg/dL) Change from Baseline | Day 6     | 8             | -0.188 | 0.3271  | -0.050 | ( -0.80, 0.20)    |
|                    |                                      | Day 14    | 7             | -0.157 | 0.2070  | -0.200 | ( -0.40, 0.20)    |
|                    |                                      | Day 30    | 7             | -0.271 | 0.3450  | -0.100 | ( -0.90, 0.00)    |
|                    |                                      | Day 42    | 7             | -0.214 | 0.2911  | -0.200 | ( -0.60, 0.10)    |

Source Listing: 10.1, 10.2, 10.3, 10.4

SAS program path: U:\Project Folders - UK\Collectar\XV008001\Statistics\SASProgs\T11\_1.sas SSasidharapanickar

08APR2010 10:16



Table 11.1  
 Summary of Laboratory Data - Quantitative  
 Safety Population (N = 8)

| Laboratory Type    | Parameter                             | Visit     | I-131-CLR1404 |          |          |          |                    |
|--------------------|---------------------------------------|-----------|---------------|----------|----------|----------|--------------------|
|                    |                                       |           | N             | Mean     | Std Dev  | Median   | Range              |
| Clinical Chemistry | Chloride (MEQ/L)                      | Screening | 8             | 104.500  | 2.9761   | 103.500  | ( 102.00, 111.00)  |
|                    |                                       | Baseline  | 6             | 104.000  | 3.7947   | 103.000  | ( 100.00, 111.00)  |
|                    |                                       | Day 6     | 8             | 103.750  | 3.2404   | 103.000  | ( 100.00, 111.00)  |
|                    |                                       | Day 14    | 7             | 104.000  | 3.5590   | 105.000  | ( 100.00, 110.00)  |
|                    |                                       | Day 30    | 7             | 102.286  | 2.7516   | 102.000  | ( 99.00, 108.00)   |
|                    |                                       | Day 42    | 7             | 103.286  | 4.4987   | 102.000  | ( 97.00, 112.00)   |
|                    | Chloride (MEQ/L) Change from Baseline | Day 6     | 8             | -0.375   | 1.9955   | 0.000    | ( -4.00, 3.00)     |
|                    |                                       | Day 14    | 7             | 0.000    | 2.1602   | -1.000   | ( -2.00, 3.00)     |
|                    |                                       | Day 30    | 7             | -1.714   | 2.4300   | -1.000   | ( -5.00, 2.00)     |
|                    |                                       | Day 42    | 7             | -0.714   | 3.1472   | 1.000    | ( -6.00, 2.00)     |
|                    | Albumin (mg/dL)                       | Screening | 8             | 3850.000 | 226.7787 | 3850.000 | (3500.00, 4200.00) |
|                    |                                       | Baseline  | 6             | 3816.667 | 248.3277 | 3750.000 | (3500.00, 4200.00) |
|                    |                                       | Day 6     | 8             | 3775.000 | 183.2251 | 3850.000 | (3500.00, 4000.00) |
|                    |                                       | Day 14    | 7             | 3628.571 | 228.8689 | 3700.000 | (3300.00, 3800.00) |
|                    |                                       | Day 30    | 7             | 3871.429 | 197.6047 | 3900.000 | (3500.00, 4100.00) |
|                    |                                       | Day 42    | 7             | 3771.429 | 188.9822 | 3700.000 | (3500.00, 4100.00) |
|                    | Albumin (mg/dL) Change from Baseline  | Day 6     | 8             | -37.500  | 176.7767 | -50.000  | (-300.00, 200.00)  |
|                    |                                       | Day 14    | 7             | -128.571 | 179.9471 | -200.000 | (-400.00, 100.00)  |
|                    |                                       | Day 30    | 7             | 114.286  | 157.3592 | 100.000  | (-100.00, 300.00)  |
|                    |                                       | Day 42    | 7             | 14.286   | 157.3592 | 0.000    | (-200.00, 200.00)  |

Source Listing: 10.1, 10.2, 10.3, 10.4

SAS program path: U:\Project Folders - UK\Collectar\XVO08001\Statistics\SASProgs\T11\_1.sas SSasidharapanickar

08APR2010 10:16

Table 11.1  
 Summary of Laboratory Data - Quantitative  
 Safety Population (N = 8)

| Laboratory Type    | Parameter                                       | Visit     | I-131-CLR1404 |         |         |         |                   |  |
|--------------------|-------------------------------------------------|-----------|---------------|---------|---------|---------|-------------------|--|
|                    |                                                 |           | N             | Mean    | Std Dev | Median  | Range             |  |
| Clinical Chemistry | Total Bilirubin (mg/dL)                         | Screening | 8             | 0.563   | 0.2560  | 0.550   | ( 0.20, 0.90)     |  |
|                    |                                                 | Baseline  | 6             | 0.633   | 0.2066  | 0.500   | ( 0.50, 0.90)     |  |
|                    |                                                 | Day 6     | 8             | 0.588   | 0.2588  | 0.600   | ( 0.20, 1.00)     |  |
|                    |                                                 | Day 14    | 7             | 0.571   | 0.1604  | 0.500   | ( 0.40, 0.90)     |  |
|                    |                                                 | Day 30    | 7             | 0.643   | 0.2149  | 0.700   | ( 0.30, 1.00)     |  |
|                    |                                                 | Day 42    | 7             | 0.629   | 0.1704  | 0.600   | ( 0.40, 0.80)     |  |
|                    | Total Bilirubin (mg/dL) Change from Baseline    | Day 6     | 8             | -0.100  | 0.2204  | -0.100  | ( -0.50, 0.20)    |  |
|                    |                                                 | Day 14    | 7             | -0.143  | 0.1902  | -0.100  | ( -0.40, 0.10)    |  |
|                    |                                                 | Day 30    | 7             | -0.071  | 0.1380  | -0.100  | ( -0.20, 0.10)    |  |
|                    |                                                 | Day 42    | 7             | -0.086  | 0.1069  | -0.100  | ( -0.30, 0.00)    |  |
|                    | Alkaline Phosphatase (U/L)                      | Screening | 8             | 116.500 | 82.5919 | 81.500  | ( 50.00, 297.00)  |  |
|                    |                                                 | Baseline  | 6             | 128.167 | 76.9868 | 101.000 | ( 52.00, 256.00)  |  |
|                    |                                                 | Day 6     | 8             | 106.875 | 58.7305 | 84.000  | ( 48.00, 199.00)  |  |
|                    |                                                 | Day 14    | 7             | 94.000  | 58.5320 | 75.000  | ( 51.00, 220.00)  |  |
|                    |                                                 | Day 30    | 7             | 105.429 | 80.8926 | 77.000  | ( 61.00, 285.00)  |  |
|                    |                                                 | Day 42    | 7             | 106.857 | 85.6085 | 76.000  | ( 53.00, 298.00)  |  |
|                    | Alkaline Phosphatase (U/L) Change from Baseline | Day 6     | 8             | -6.875  | 36.0176 | -3.000  | ( -85.00, 40.00)  |  |
|                    |                                                 | Day 14    | 7             | 0.571   | 16.7118 | -3.000  | ( -15.00, 37.00)  |  |
|                    |                                                 | Day 30    | 7             | 12.000  | 40.2823 | -1.000  | ( -14.00, 102.00) |  |
|                    |                                                 | Day 42    | 7             | 13.429  | 45.1621 | -2.000  | ( -11.00, 115.00) |  |

Source Listing: 10.1, 10.2, 10.3, 10.4

SAS program path: U:\Project Folders - UK\Collectar\XVO08001\Statistics\SASProgs\T11\_1.sas SSasidharapanickar

08APR2010 10:16

Table 11.1  
 Summary of Laboratory Data - Quantitative  
 Safety Population (N = 8)

| Laboratory Type    | Parameter                      | Visit     | I-131-CLR1404 |        |         |        |                 |
|--------------------|--------------------------------|-----------|---------------|--------|---------|--------|-----------------|
|                    |                                |           | N             | Mean   | Std Dev | Median | Range           |
| Clinical Chemistry | AST (U/L)                      | Screening | 8             | 25.875 | 11.0768 | 22.500 | ( 17.00, 52.00) |
|                    |                                | Baseline  | 6             | 26.667 | 7.3394  | 26.000 | ( 18.00, 40.00) |
|                    |                                | Day 6     | 8             | 27.375 | 8.3313  | 23.500 | ( 17.00, 43.00) |
|                    |                                | Day 14    | 7             | 22.571 | 4.3150  | 24.000 | ( 14.00, 28.00) |
|                    |                                | Day 30    | 7             | 23.429 | 4.5774  | 24.000 | ( 17.00, 29.00) |
|                    |                                | Day 42    | 7             | 24.429 | 5.5032  | 23.000 | ( 16.00, 32.00) |
|                    | AST (U/L) Change from Baseline | Day 6     | 8             | 2.000  | 4.5670  | 1.500  | ( -3.00, 11.00) |
|                    |                                | Day 14    | 7             | -0.714 | 2.6904  | -1.000 | ( -4.00, 4.00)  |
|                    |                                | Day 30    | 7             | 0.143  | 4.9135  | -1.000 | ( -6.00, 9.00)  |
|                    |                                | Day 42    | 7             | 1.143  | 5.1455  | 1.000  | ( -5.00, 8.00)  |
|                    | ALT (U/L)                      | Screening | 8             | 18.750 | 9.1456  | 16.500 | ( 9.00, 37.00)  |
|                    |                                | Baseline  | 6             | 18.667 | 6.3456  | 18.000 | ( 11.00, 29.00) |
|                    |                                | Day 6     | 8             | 20.625 | 7.0089  | 18.500 | ( 14.00, 36.00) |
|                    |                                | Day 14    | 7             | 16.714 | 8.0976  | 15.000 | ( 10.00, 34.00) |
|                    |                                | Day 30    | 7             | 18.143 | 13.8856 | 15.000 | ( 8.00, 49.00)  |
|                    |                                | Day 42    | 7             | 18.000 | 10.4243 | 15.000 | ( 10.00, 40.00) |
|                    | ALT (U/L) Change from Baseline | Day 6     | 8             | -0.375 | 3.5026  | -1.500 | ( -4.00, 7.00)  |
|                    |                                | Day 14    | 7             | -3.143 | 1.7728  | -3.000 | ( -6.00, -1.00) |
|                    |                                | Day 30    | 7             | -1.714 | 6.9693  | -3.000 | ( -9.00, 12.00) |
|                    |                                | Day 42    | 7             | -1.857 | 3.7161  | -2.000 | ( -7.00, 3.00)  |

Source Listing: 10.1, 10.2, 10.3, 10.4

SAS program path: U:\Project Folders - UK\Collectar\XVO08001\Statistics\SASProgs\T11\_1.sas SSasidharapanickar

08APR2010 10:16

Table 11.1  
 Summary of Laboratory Data - Quantitative  
 Safety Population (N = 8)

| Laboratory Type    | Parameter                               | Visit     | I-131-CLR1404 |        |         |        |                 |  |
|--------------------|-----------------------------------------|-----------|---------------|--------|---------|--------|-----------------|--|
|                    |                                         |           | N             | Mean   | Std Dev | Median | Range           |  |
| Clinical Chemistry | Creatinine (mg/dL)                      | Screening | 8             | 0.998  | 0.3267  | 0.915  | ( 0.60, 1.60)   |  |
|                    |                                         | Baseline  | 6             | 0.977  | 0.1973  | 1.000  | ( 0.62, 1.20)   |  |
|                    |                                         | Day 6     | 8             | 1.026  | 0.2855  | 1.100  | ( 0.60, 1.30)   |  |
|                    |                                         | Day 14    | 7             | 0.983  | 0.2899  | 1.000  | ( 0.58, 1.30)   |  |
|                    |                                         | Day 30    | 7             | 0.996  | 0.2997  | 1.100  | ( 0.60, 1.30)   |  |
|                    |                                         | Day 42    | 7             | 0.943  | 0.2440  | 1.000  | ( 0.60, 1.20)   |  |
|                    | Creatinine (mg/dL) Change from Baseline | Day 6     | 8             | 0.069  | 0.0996  | 0.100  | ( -0.13, 0.20)  |  |
|                    |                                         | Day 14    | 7             | 0.023  | 0.0547  | 0.000  | ( -0.04, 0.10)  |  |
|                    |                                         | Day 30    | 7             | 0.036  | 0.1107  | 0.100  | ( -0.20, 0.10)  |  |
|                    |                                         | Day 42    | 7             | -0.017 | 0.0373  | 0.000  | ( -0.10, 0.00)  |  |
| Hematology         | Hemoglobin (g/dL)                       | Screening | 8             | 13.400 | 0.8896  | 13.500 | ( 12.00, 15.00) |  |
|                    |                                         | Baseline  | 6             | 13.483 | 0.8954  | 13.700 | ( 12.10, 14.60) |  |
|                    |                                         | Day 6     | 8             | 13.075 | 0.9982  | 13.050 | ( 11.50, 14.80) |  |
|                    |                                         | Day 14    | 8             | 12.975 | 0.9750  | 13.200 | ( 11.40, 14.20) |  |
|                    |                                         | Day 30    | 7             | 13.214 | 1.1261  | 13.600 | ( 11.10, 14.60) |  |
|                    |                                         | Day 42    | 8             | 13.238 | 1.1426  | 13.600 | ( 10.80, 14.60) |  |
|                    | Hemoglobin (g/dL) Change from Baseline  | Day 6     | 8             | -0.588 | 0.6664  | -0.400 | ( -1.80, 0.10)  |  |
|                    |                                         | Day 14    | 8             | -0.688 | 0.3871  | -0.650 | ( -1.40, -0.30) |  |
|                    |                                         | Day 30    | 7             | -0.429 | 0.7111  | -0.400 | ( -1.70, 0.60)  |  |
|                    |                                         | Day 42    | 8             | -0.425 | 0.7459  | -0.250 | ( -2.00, 0.40)  |  |

Source Listing: 10.1, 10.2, 10.3, 10.4

SAS program path: U:\Project Folders - UK\Collectar\XVO08001\Statistics\SASProgs\T11\_1.sas SSasidharapanickar

08APR2010 10:16

Table 11.1  
 Summary of Laboratory Data - Quantitative  
 Safety Population (N = 8)

| Laboratory Type | Parameter                                      | Visit     | I-131-CLR1404 |        |         |        |                 |
|-----------------|------------------------------------------------|-----------|---------------|--------|---------|--------|-----------------|
|                 |                                                |           | N             | Mean   | Std Dev | Median | Range           |
| Hematology      | Hematocrit (%)                                 | Screening | 8             | 39.913 | 2.3877  | 40.050 | ( 36.00, 42.90) |
|                 |                                                | Baseline  | 6             | 40.283 | 2.6339  | 40.000 | ( 36.30, 43.20) |
|                 |                                                | Day 6     | 8             | 39.000 | 3.3840  | 38.350 | ( 34.00, 44.50) |
|                 |                                                | Day 14    | 8             | 38.688 | 2.9367  | 38.850 | ( 34.60, 42.50) |
|                 |                                                | Day 30    | 7             | 39.629 | 3.8595  | 40.000 | ( 33.00, 44.90) |
|                 |                                                | Day 42    | 8             | 39.700 | 3.5557  | 40.100 | ( 33.00, 44.00) |
|                 | Hematocrit (%) Change from Baseline            | Day 6     | 8             | -1.575 | 2.6847  | -1.750 | ( -5.20, 2.00)  |
|                 |                                                | Day 14    | 8             | -1.888 | 1.3943  | -1.950 | ( -4.00, 0.00)  |
|                 |                                                | Day 30    | 7             | -1.029 | 2.8646  | -0.200 | ( -6.00, 2.10)  |
|                 |                                                | Day 42    | 8             | -0.875 | 2.5070  | 0.300  | ( -6.00, 1.20)  |
|                 | Red Blood Count (10x6/uL)                      | Screening | 8             | 4.474  | 0.3977  | 4.550  | ( 3.97, 5.19)   |
|                 |                                                | Baseline  | 6             | 4.605  | 0.3826  | 4.525  | ( 4.27, 5.18)   |
|                 |                                                | Day 6     | 8             | 4.379  | 0.4069  | 4.285  | ( 3.83, 4.93)   |
|                 |                                                | Day 14    | 8             | 4.348  | 0.4446  | 4.300  | ( 3.84, 5.14)   |
|                 |                                                | Day 30    | 7             | 4.420  | 0.5189  | 4.490  | ( 3.72, 5.24)   |
|                 |                                                | Day 42    | 8             | 4.449  | 0.4817  | 4.500  | ( 3.67, 5.33)   |
|                 | Red Blood Count (10x6/uL) Change from Baseline | Day 6     | 8             | -0.165 | 0.2326  | -0.125 | ( -0.52, 0.15)  |
|                 |                                                | Day 14    | 8             | -0.196 | 0.1278  | -0.180 | ( -0.44, -0.04) |
|                 |                                                | Day 30    | 7             | -0.093 | 0.2646  | -0.020 | ( -0.56, 0.20)  |
|                 |                                                | Day 42    | 8             | -0.095 | 0.2637  | -0.065 | ( -0.61, 0.15)  |

Source Listing: 10.1, 10.2, 10.3, 10.4

SAS program path: U:\Project Folders - UK\Collectar\XVO08001\Statistics\SASProgs\T11\_1.sas SSasidharapanickar

08APR2010 10:16

Table 11.1  
 Summary of Laboratory Data - Quantitative  
 Safety Population (N = 8)

| Laboratory Type | Parameter                     | Visit     | I-131-CLR1404 |        |         |        |                 |
|-----------------|-------------------------------|-----------|---------------|--------|---------|--------|-----------------|
|                 |                               |           | N             | Mean   | Std Dev | Median | Range           |
| Hematology      | MCV (FL)                      | Screening | 8             | 89.725 | 5.0273  | 90.450 | ( 82.60, 97.70) |
|                 |                               | Baseline  | 6             | 87.583 | 4.2692  | 86.850 | ( 83.20, 93.60) |
|                 |                               | Day 6     | 8             | 89.313 | 4.4585  | 88.850 | ( 83.30, 96.30) |
|                 |                               | Day 14    | 8             | 89.125 | 4.7972  | 88.600 | ( 81.80, 95.90) |
|                 |                               | Day 30    | 7             | 89.900 | 5.4693  | 89.000 | ( 82.00, 97.00) |
|                 |                               | Day 42    | 8             | 89.413 | 5.1285  | 88.850 | ( 82.30, 95.50) |
|                 | MCV (FL) Change from Baseline | Day 6     | 8             | -0.187 | 1.5245  | -0.450 | ( -1.50, 3.00)  |
|                 |                               | Day 14    | 8             | -0.375 | 1.5069  | -1.000 | ( -1.90, 2.00)  |
|                 |                               | Day 30    | 7             | -0.386 | 1.3005  | -0.700 | ( -2.00, 1.70)  |
|                 |                               | Day 42    | 8             | -0.088 | 1.6348  | -0.550 | ( -2.20, 2.40)  |
|                 | MCH (PG)                      | Screening | 8             | 30.088 | 2.1970  | 29.750 | ( 26.60, 32.70) |
|                 |                               | Baseline  | 6             | 29.317 | 1.6339  | 29.450 | ( 27.00, 31.70) |
|                 |                               | Day 6     | 8             | 29.963 | 1.8205  | 29.850 | ( 27.10, 32.90) |
|                 |                               | Day 14    | 8             | 30.025 | 2.3566  | 29.750 | ( 25.80, 33.30) |
|                 |                               | Day 30    | 7             | 30.043 | 2.4027  | 30.000 | ( 26.00, 33.20) |
|                 |                               | Day 42    | 8             | 29.888 | 2.1404  | 29.700 | ( 26.00, 32.60) |
|                 | MCH (PG) Change from Baseline | Day 6     | 8             | -0.188 | 0.6244  | -0.100 | ( -1.50, 0.60)  |
|                 |                               | Day 14    | 8             | -0.125 | 0.7555  | -0.050 | ( -1.20, 0.70)  |
|                 |                               | Day 30    | 7             | -0.271 | 0.8420  | -0.100 | ( -1.80, 0.50)  |
|                 |                               | Day 42    | 8             | -0.263 | 0.7070  | -0.300 | ( -1.00, 0.90)  |

Source Listing: 10.1, 10.2, 10.3, 10.4

SAS program path: U:\Project Folders - UK\Collectar\XVO08001\Statistics\SASProgs\T11\_1.sas SSasidharapanickar

08APR2010 10:16

Table 11.1  
 Summary of Laboratory Data - Quantitative  
 Safety Population (N = 8)

| Laboratory Type | Parameter                                        | Visit     | I-131-CLR1404 |        |         |        |                 |
|-----------------|--------------------------------------------------|-----------|---------------|--------|---------|--------|-----------------|
|                 |                                                  |           | N             | Mean   | Std Dev | Median | Range           |
| Hematology      | MCHC (PG)                                        | Screening | 8             | 33.513 | 0.9031  | 33.300 | ( 32.20, 35.10) |
|                 |                                                  | Baseline  | 6             | 30.367 | 7.9482  | 33.550 | ( 14.20, 34.50) |
|                 |                                                  | Day 6     | 8             | 33.550 | 0.5425  | 33.600 | ( 32.60, 34.10) |
|                 |                                                  | Day 14    | 8             | 33.613 | 1.0656  | 33.600 | ( 31.50, 34.90) |
|                 |                                                  | Day 30    | 7             | 33.400 | 0.9747  | 33.600 | ( 31.70, 34.30) |
|                 |                                                  | Day 42    | 8             | 33.400 | 0.9754  | 33.400 | ( 31.60, 34.60) |
|                 | MCHC (PG) Change from Baseline                   | Day 6     | 8             | 2.200  | 6.9284  | 0.150  | ( -1.80, 19.20) |
|                 |                                                  | Day 14    | 8             | 2.263  | 6.7534  | 0.250  | ( -1.60, 18.80) |
|                 |                                                  | Day 30    | 7             | 2.500  | 7.5313  | 0.400  | ( -2.50, 19.40) |
|                 |                                                  | Day 42    | 8             | 2.050  | 6.6567  | 0.000  | ( -1.90, 18.40) |
|                 | White Blood Count (10x3/uL)                      | Screening | 8             | 6.908  | 1.9083  | 6.730  | ( 4.30, 10.70)  |
|                 |                                                  | Baseline  | 6             | 7.915  | 3.0760  | 6.850  | ( 4.60, 12.60)  |
|                 |                                                  | Day 6     | 8             | 7.199  | 1.9174  | 7.700  | ( 4.30, 9.70)   |
|                 |                                                  | Day 14    | 8             | 6.395  | 1.6943  | 6.550  | ( 4.10, 9.20)   |
|                 |                                                  | Day 30    | 7             | 6.699  | 2.3178  | 6.100  | ( 3.70, 10.00)  |
|                 |                                                  | Day 42    | 8             | 6.568  | 1.6264  | 6.570  | ( 4.40, 9.10)   |
|                 | White Blood Count (10x3/uL) Change from Baseline | Day 6     | 8             | -0.513 | 2.2306  | -0.450 | ( -3.90, 2.50)  |
|                 |                                                  | Day 14    | 8             | -1.316 | 1.6355  | -1.000 | ( -3.80, 0.90)  |
|                 |                                                  | Day 30    | 7             | -1.186 | 0.9155  | -1.000 | ( -2.60, 0.20)  |
|                 |                                                  | Day 42    | 8             | -1.144 | 1.8286  | -1.350 | ( -3.50, 1.40)  |

Source Listing: 10.1, 10.2, 10.3, 10.4

SAS program path: U:\Project Folders - UK\Collectar\XVO08001\Statistics\SASProgs\T11\_1.sas SSasidharapanickar

08APR2010 10:16

Table 11.1  
 Summary of Laboratory Data - Quantitative  
 Safety Population (N = 8)

| Laboratory Type | Parameter                            | Visit     | I-131-CLR1404 |        |         |        |                 |
|-----------------|--------------------------------------|-----------|---------------|--------|---------|--------|-----------------|
|                 |                                      |           | N             | Mean   | Std Dev | Median | Range           |
| Hematology      | Lymphocytes (%)                      | Screening | 8             | 27.925 | 7.1159  | 31.100 | ( 19.00, 37.60) |
|                 |                                      | Baseline  | 6             | 22.467 | 8.7995  | 19.950 | ( 15.50, 39.20) |
|                 |                                      | Day 6     | 8             | 21.713 | 8.5362  | 22.300 | ( 7.30, 30.90)  |
|                 |                                      | Day 14    | 8             | 21.688 | 5.6819  | 21.650 | ( 14.80, 28.10) |
|                 |                                      | Day 30    | 7             | 23.443 | 7.2863  | 23.900 | ( 15.10, 32.60) |
|                 |                                      | Day 42    | 8             | 21.838 | 6.1176  | 24.150 | ( 10.80, 28.50) |
|                 | Lymphocytes (%) Change from Baseline | Day 6     | 8             | -3.138 | 5.4450  | -2.200 | ( -13.40, 3.00) |
|                 |                                      | Day 14    | 8             | -3.163 | 5.5017  | -2.950 | ( -11.10, 3.50) |
|                 |                                      | Day 30    | 7             | -2.743 | 4.0505  | -4.100 | ( -7.00, 3.00)  |
|                 |                                      | Day 42    | 8             | -3.013 | 7.1941  | -2.600 | ( -14.70, 4.60) |
|                 | Monocytes (%)                        | Screening | 8             | 9.075  | 3.0556  | 8.000  | ( 6.20, 15.70)  |
|                 |                                      | Baseline  | 6             | 9.217  | 3.3725  | 8.250  | ( 5.80, 15.60)  |
|                 |                                      | Day 6     | 8             | 8.825  | 2.1238  | 8.000  | ( 7.30, 13.60)  |
|                 |                                      | Day 14    | 8             | 10.500 | 5.7309  | 8.800  | ( 7.30, 24.50)  |
|                 |                                      | Day 30    | 7             | 10.543 | 3.8621  | 8.300  | ( 8.00, 18.50)  |
|                 |                                      | Day 42    | 8             | 8.288  | 1.2206  | 8.350  | ( 6.70, 10.70)  |
|                 | Monocytes (%) Change from Baseline   | Day 6     | 8             | -0.313 | 1.3726  | -0.150 | ( -2.50, 1.70)  |
|                 |                                      | Day 14    | 8             | 1.363  | 3.2544  | 0.400  | ( -1.10, 8.90)  |
|                 |                                      | Day 30    | 7             | 1.200  | 1.9570  | 0.700  | ( -1.40, 4.10)  |
|                 |                                      | Day 42    | 8             | -0.850 | 2.2791  | -0.700 | ( -4.90, 3.10)  |

Source Listing: 10.1, 10.2, 10.3, 10.4

SAS program path: U:\Project Folders - UK\Collectar\XVO08001\Statistics\SASProgs\T11\_1.sas SSasidharapanickar

08APR2010 10:16



Table 11.1  
 Summary of Laboratory Data - Quantitative  
 Safety Population (N = 8)

| Laboratory Type | Parameter                            | Visit     | I-131-CLR1404 |        |         |        |                |  |
|-----------------|--------------------------------------|-----------|---------------|--------|---------|--------|----------------|--|
|                 |                                      |           | N             | Mean   | Std Dev | Median | Range          |  |
| Hematology      | Eosinophils (%)                      | Screening | 8             | 3.725  | 2.3169  | 3.800  | ( 0.90, 6.90)  |  |
|                 |                                      | Baseline  | 6             | 4.500  | 1.9759  | 4.200  | ( 1.50, 6.80)  |  |
|                 |                                      | Day 6     | 8             | 3.775  | 2.4283  | 4.250  | ( 0.90, 7.30)  |  |
|                 |                                      | Day 14    | 8             | 4.100  | 2.4071  | 3.600  | ( 1.20, 7.90)  |  |
|                 |                                      | Day 30    | 7             | 3.357  | 2.1031  | 3.500  | ( 0.80, 6.20)  |  |
|                 |                                      | Day 42    | 8             | 3.725  | 2.6671  | 2.650  | ( 1.30, 7.30)  |  |
|                 | Eosinophils (%) Change from Baseline | Day 6     | 8             | -0.375 | 1.2464  | -0.250 | ( -3.10, 1.00) |  |
|                 |                                      | Day 14    | 8             | -0.050 | 1.0836  | -0.350 | ( -1.30, 1.80) |  |
|                 |                                      | Day 30    | 7             | -0.414 | 0.7267  | -0.600 | ( -1.40, 1.00) |  |
|                 |                                      | Day 42    | 8             | -0.425 | 1.6193  | -0.350 | ( -2.90, 2.20) |  |
|                 | Basophils (%)                        | Screening | 8             | 0.650  | 0.3854  | 0.500  | ( 0.30, 1.50)  |  |
|                 |                                      | Baseline  | 6             | 0.517  | 0.2041  | 0.500  | ( 0.30, 0.80)  |  |
|                 |                                      | Day 6     | 8             | 0.663  | 0.3114  | 0.600  | ( 0.40, 1.40)  |  |
|                 |                                      | Day 14    | 8             | 0.600  | 0.2449  | 0.600  | ( 0.20, 1.00)  |  |
|                 |                                      | Day 30    | 7             | 0.729  | 0.4716  | 0.400  | ( 0.40, 1.40)  |  |
|                 |                                      | Day 42    | 8             | 0.650  | 0.3505  | 0.600  | ( 0.30, 1.40)  |  |
|                 | Basophils (%) Change from Baseline   | Day 6     | 8             | 0.025  | 0.2375  | 0.000  | ( -0.40, 0.30) |  |
|                 |                                      | Day 14    | 8             | -0.038 | 0.4470  | 0.100  | ( -0.90, 0.50) |  |
|                 |                                      | Day 30    | 7             | 0.071  | 0.2498  | 0.000  | ( -0.10, 0.60) |  |
|                 |                                      | Day 42    | 8             | 0.012  | 0.2416  | -0.100 | ( -0.20, 0.50) |  |

Source Listing: 10.1, 10.2, 10.3, 10.4

SAS program path: U:\Project Folders - UK\Collectar\XVO08001\Statistics\SASProgs\T11\_1.sas SSasidharapanickar

08APR2010 10:16

Table 11.1  
 Summary of Laboratory Data - Quantitative  
 Safety Population (N = 8)

| Laboratory Type | Parameter                                | Visit     | I-131-CLR1404 |         |         |         |                   |  |
|-----------------|------------------------------------------|-----------|---------------|---------|---------|---------|-------------------|--|
|                 |                                          |           | N             | Mean    | Std Dev | Median  | Range             |  |
| Hematology      | ANC (10x3/uL)                            | Screening | 8             | 4.081   | 1.4071  | 3.850   | ( 2.20, 7.00)     |  |
|                 |                                          | Baseline  | 6             | 5.173   | 2.5390  | 4.450   | ( 2.20, 8.70)     |  |
|                 |                                          | Day 6     | 8             | 4.736   | 1.5849  | 4.800   | ( 2.40, 6.49)     |  |
|                 |                                          | Day 14    | 8             | 4.045   | 1.2032  | 3.800   | ( 2.60, 6.00)     |  |
|                 |                                          | Day 30    | 7             | 4.174   | 1.6719  | 3.700   | ( 2.00, 6.50)     |  |
|                 |                                          | Day 42    | 8             | 4.335   | 1.2715  | 4.200   | ( 2.80, 6.00)     |  |
|                 | ANC (10x3/uL) Change from Baseline       | Day 6     | 8             | -0.106  | 2.0207  | 0.150   | ( -3.10, 3.05)    |  |
|                 |                                          | Day 14    | 8             | -0.798  | 1.3788  | -0.440  | ( -3.00, 0.70)    |  |
|                 |                                          | Day 30    | 7             | -0.717  | 0.8768  | -0.320  | ( -2.40, 0.20)    |  |
|                 |                                          | Day 42    | 8             | -0.508  | 1.7114  | -0.600  | ( -2.90, 1.94)    |  |
|                 | Platelets (10x3/uL)                      | Screening | 8             | 264.500 | 63.1664 | 271.500 | ( 185.00, 356.00) |  |
|                 |                                          | Baseline  | 6             | 267.667 | 73.1182 | 262.000 | ( 169.00, 375.00) |  |
|                 |                                          | Day 6     | 8             | 270.875 | 64.9977 | 278.000 | ( 197.00, 375.00) |  |
|                 |                                          | Day 14    | 8             | 274.875 | 69.5443 | 299.000 | ( 186.00, 361.00) |  |
|                 |                                          | Day 30    | 7             | 239.000 | 41.8171 | 232.000 | ( 184.00, 303.00) |  |
|                 |                                          | Day 42    | 8             | 234.250 | 36.8191 | 227.000 | ( 192.00, 289.00) |  |
|                 | Platelets (10x3/uL) Change from Baseline | Day 6     | 8             | 9.375   | 37.9245 | -1.500  | ( -33.00, 90.00)  |  |
|                 |                                          | Day 14    | 8             | 13.375  | 39.1332 | 2.000   | ( -23.00, 96.00)  |  |
|                 |                                          | Day 30    | 7             | -35.714 | 21.0690 | -25.000 | ( -72.00, -16.00) |  |
|                 |                                          | Day 42    | 8             | -27.250 | 40.5806 | -33.500 | ( -86.00, 41.00)  |  |

Source Listing: 10.1, 10.2, 10.3, 10.4

SAS program path: U:\Project Folders - UK\Collectar\XV008001\Statistics\SASProgs\T11\_1.sas SSasidharapanickar

08APR2010 10:16

Table 11.1  
 Summary of Laboratory Data - Quantitative  
 Safety Population (N = 8)

| Laboratory Type | Parameter                                    | Visit     | I-131-CLR1404 |        |         |        |                |  |
|-----------------|----------------------------------------------|-----------|---------------|--------|---------|--------|----------------|--|
|                 |                                              |           | N             | Mean   | Std Dev | Median | Range          |  |
| Urinalysis      | Epithelial cells (/hpf)                      | Screening | 5             | 0.400  | 0.5477  | 0.000  | ( 0.00, 1.00)  |  |
|                 |                                              | Baseline  | 4             | 0.500  | 0.5774  | 0.500  | ( 0.00, 1.00)  |  |
|                 |                                              | Day 6     | 6             | 0.667  | 1.2111  | 0.000  | ( 0.00, 3.00)  |  |
|                 |                                              | Day 14    | 6             | 0.667  | 1.6330  | 0.000  | ( 0.00, 4.00)  |  |
|                 |                                              | Day 30    | 5             | 0.200  | 0.4472  | 0.000  | ( 0.00, 1.00)  |  |
|                 |                                              | Day 42    | 4             | 0.250  | 0.5000  | 0.000  | ( 0.00, 1.00)  |  |
|                 | Epithelial cells (/hpf) Change from Baseline | Day 6     | 5             | 0.200  | 1.0954  | 0.000  | ( -1.00, 2.00) |  |
|                 |                                              | Day 14    | 5             | -0.400 | 0.5477  | 0.000  | ( -1.00, 0.00) |  |
|                 |                                              | Day 30    | 5             | -0.200 | 0.8367  | 0.000  | ( -1.00, 1.00) |  |
|                 |                                              | Day 42    | 4             | -0.250 | 0.5000  | 0.000  | ( -1.00, 0.00) |  |
|                 | White Blood Cells (/UL)                      | Screening | 6             | 3.000  | 3.2249  | 2.000  | ( 0.00, 9.00)  |  |
|                 |                                              | Baseline  | 4             | 3.250  | 4.0311  | 2.000  | ( 0.00, 9.00)  |  |
|                 |                                              | Day 6     | 6             | 3.167  | 2.9944  | 2.500  | ( 1.00, 9.00)  |  |
|                 |                                              | Day 14    | 6             | 1.000  | 0.8944  | 1.000  | ( 0.00, 2.00)  |  |
|                 |                                              | Day 30    | 5             | 1.800  | 1.9235  | 1.000  | ( 0.00, 5.00)  |  |
|                 |                                              | Day 42    | 4             | 3.500  | 4.3589  | 1.500  | ( 1.00, 10.00) |  |
|                 | white blood cells (/UL) Change from Baseline | Day 6     | 6             | -0.667 | 2.6583  | 0.000  | ( -6.00, 1.00) |  |
|                 |                                              | Day 14    | 6             | -2.833 | 4.1191  | -1.000 | ( -9.00, 1.00) |  |
|                 |                                              | Day 30    | 5             | -1.000 | 1.7321  | 0.000  | ( -4.00, 0.00) |  |
|                 |                                              | Day 42    | 4             | 0.250  | 0.9574  | 0.500  | ( -1.00, 1.00) |  |

Source Listing: 10.1, 10.2, 10.3, 10.4

SAS program path: U:\Project Folders - UK\Collectar\XVO08001\Statistics\SASProgs\T11\_1.sas SSasidharapanickar

08APR2010 10:16

Table 11.1  
 Summary of Laboratory Data - Quantitative  
 Safety Population (N = 8)

| Laboratory Type | Parameter                                  | Visit     | I-131-CLR1404 |        |         |        |                 |  |
|-----------------|--------------------------------------------|-----------|---------------|--------|---------|--------|-----------------|--|
|                 |                                            |           | N             | Mean   | Std Dev | Median | Range           |  |
| Urinalysis      | Red Blood Cells (/UL)                      | Screening | 6             | 4.000  | 2.6833  | 4.500  | ( 1.00, 8.00)   |  |
|                 |                                            | Baseline  | 4             | 6.750  | 10.3078 | 2.500  | ( 0.00, 22.00)  |  |
|                 |                                            | Day 6     | 6             | 6.167  | 5.1929  | 5.000  | ( 1.00, 15.00)  |  |
|                 |                                            | Day 14    | 6             | 2.500  | 3.3317  | 1.000  | ( 0.00, 9.00)   |  |
|                 |                                            | Day 30    | 6             | 3.833  | 2.6394  | 4.000  | ( 0.00, 7.00)   |  |
|                 |                                            | Day 42    | 4             | 3.750  | 1.8930  | 4.500  | ( 1.00, 5.00)   |  |
|                 | Red Blood Cells (/UL) Change from Baseline | Day 6     | 6             | 0.667  | 4.5019  | 2.000  | ( -7.00, 5.00)  |  |
|                 |                                            | Day 14    | 6             | -3.000 | 10.1193 | -0.500 | ( -22.00, 8.00) |  |
|                 |                                            | Day 30    | 6             | -1.667 | 7.0616  | 1.000  | ( -16.00, 2.00) |  |
|                 |                                            | Day 42    | 4             | -4.000 | 8.7178  | 0.000  | ( -17.00, 1.00) |  |
|                 | Casts (/lpf)                               | Screening | 3             | 4.667  | 5.6862  | 3.000  | ( 0.00, 11.00)  |  |
|                 |                                            | Baseline  | 3             | 0.333  | 0.5774  | 0.000  | ( 0.00, 1.00)   |  |
|                 |                                            | Day 6     | 3             | 3.000  | 2.6458  | 4.000  | ( 0.00, 5.00)   |  |
|                 |                                            | Day 14    | 3             | 4.333  | 5.8595  | 2.000  | ( 0.00, 11.00)  |  |
|                 |                                            | Day 30    | 3             | 0.000  | 0.0000  | 0.000  | ( 0.00, 0.00)   |  |
|                 |                                            | Day 42    | 2             | 1.500  | 2.1213  | 1.500  | ( 0.00, 3.00)   |  |
|                 | Casts (/lpf) Change from Baseline          | Day 6     | 3             | 2.667  | 3.2146  | 4.000  | ( -1.00, 5.00)  |  |
|                 |                                            | Day 14    | 3             | 4.000  | 6.2450  | 2.000  | ( -1.00, 11.00) |  |
|                 |                                            | Day 30    | 3             | -0.333 | 0.5774  | 0.000  | ( -1.00, 0.00)  |  |
|                 |                                            | Day 42    | 2             | 1.000  | 2.8284  | 1.000  | ( -1.00, 3.00)  |  |

Source Listing: 10.1, 10.2, 10.3, 10.4

Table 11.1  
 Summary of Laboratory Data - Quantitative  
 Safety Population (N = 8)

|                 |                                      | I-131-CLR1404 |   |       |         |        |       |              |
|-----------------|--------------------------------------|---------------|---|-------|---------|--------|-------|--------------|
| Laboratory Type | Parameter                            | Visit         | N | Mean  | Std Dev | Median | Range |              |
| Urinalysis      | Crystals (/lpf)                      | Screening     | 2 | 0.000 | 0.0000  | 0.000  | (     | 0.00, 0.00)  |
|                 |                                      | Baseline      | 1 | 0.000 | 0.0000  | 0.000  | (     | 0.00, 0.00)  |
|                 |                                      | Day 6         | 1 | 0.000 | 0.0000  | 0.000  | (     | 0.00, 0.00)  |
|                 |                                      | Day 14        | 1 | 0.000 | 0.0000  | 0.000  | (     | 0.00, 0.00)  |
|                 |                                      | Day 30        | 1 | 0.000 | 0.0000  | 0.000  | (     | 0.00, 0.00)  |
|                 |                                      | Day 42        | 1 | 0.000 | 0.0000  | 0.000  | (     | 0.00, 0.00)  |
|                 | Crystals (/lpf) Change from Baseline | Day 6         | 1 | 0.000 | 0.0000  | 0.000  | (     | 0.00, 0.00)  |
|                 |                                      | Day 14        | 1 | 0.000 | 0.0000  | 0.000  | (     | 0.00, 0.00)  |
|                 |                                      | Day 30        | 1 | 0.000 | 0.0000  | 0.000  | (     | 0.00, 0.00)  |
|                 |                                      | Day 42        | 1 | 0.000 | 0.0000  | 0.000  | (     | 0.00, 0.00)  |
|                 | pH                                   | Screening     | 8 | 5.625 | 0.5825  | 5.750  | (     | 5.00, 6.50)  |
|                 |                                      | Baseline      | 6 | 5.833 | 0.5164  | 6.000  | (     | 5.00, 6.50)  |
|                 |                                      | Day 6         | 8 | 5.938 | 0.9425  | 6.000  | (     | 5.00, 8.00)  |
|                 |                                      | Day 14        | 8 | 5.813 | 0.6512  | 6.000  | (     | 5.00, 7.00)  |
|                 |                                      | Day 30        | 8 | 5.750 | 0.3780  | 6.000  | (     | 5.00, 6.00)  |
|                 |                                      | Day 42        | 6 | 5.667 | 0.7528  | 5.500  | (     | 5.00, 7.00)  |
|                 | pH Change from Baseline              | Day 6         | 8 | 0.250 | 0.9258  | 0.000  | (     | -1.00, 2.00) |
|                 |                                      | Day 14        | 8 | 0.125 | 0.5825  | 0.000  | (     | -0.50, 1.00) |
|                 |                                      | Day 30        | 8 | 0.063 | 0.4955  | 0.000  | (     | -0.50, 1.00) |
|                 |                                      | Day 42        | 6 | 0.000 | 0.7071  | 0.000  | (     | -1.00, 1.00) |

Source Listing: 10.1, 10.2, 10.3, 10.4

Table 11.1  
 Summary of Laboratory Data - Quantitative  
 Safety Population (N = 8)

| Laboratory Type | Parameter                                      | Visit     | I-131-CLR1404 |         |         |         |                   |  |
|-----------------|------------------------------------------------|-----------|---------------|---------|---------|---------|-------------------|--|
|                 |                                                |           | N             | Mean    | Std Dev | Median  | Range             |  |
| Urinalysis      | Specific Gravity                               | Screening | 8             | 1.020   | 0.0093  | 1.020   | ( 1.01, 1.03)     |  |
|                 |                                                | Baseline  | 6             | 1.018   | 0.0041  | 1.020   | ( 1.01, 1.02)     |  |
|                 |                                                | Day 6     | 8             | 1.020   | 0.0093  | 1.020   | ( 1.01, 1.03)     |  |
|                 |                                                | Day 14    | 7             | 1.016   | 0.0053  | 1.020   | ( 1.01, 1.02)     |  |
|                 |                                                | Day 30    | 8             | 1.019   | 0.0035  | 1.020   | ( 1.01, 1.02)     |  |
|                 |                                                | Day 42    | 6             | 1.020   | 0.0063  | 1.020   | ( 1.01, 1.03)     |  |
|                 | Specific Gravity Change from Baseline          | Day 6     | 8             | 0.004   | 0.0119  | 0.000   | ( -0.01, 0.02)    |  |
|                 |                                                | Day 14    | 7             | -0.003  | 0.0095  | -0.010  | ( -0.01, 0.01)    |  |
|                 |                                                | Day 30    | 8             | -0.001  | 0.0083  | 0.000   | ( -0.01, 0.01)    |  |
|                 |                                                | Day 42    | 6             | -0.002  | 0.0117  | 0.000   | ( -0.02, 0.01)    |  |
| Lipids          | Total Cholesterol (mg/dL)                      | Baseline  | 8             | 181.000 | 34.8056 | 198.000 | ( 135.00, 214.00) |  |
|                 |                                                | Day 3     | 8             | 177.375 | 27.9742 | 185.500 | ( 130.00, 203.00) |  |
|                 | Total Cholesterol (mg/dL) Change from Baseline | Day 3     | 8             | -3.625  | 12.6935 | -6.000  | ( -21.00, 22.00)  |  |
|                 | HDL (mg/dL)                                    | Baseline  | 8             | 43.625  | 17.4105 | 39.000  | ( 25.00, 74.00)   |  |
|                 |                                                | Day 3     | 8             | 43.500  | 16.7843 | 38.000  | ( 25.00, 75.00)   |  |
|                 | HDL (mg/dL) Change from Baseline               | Day 3     | 8             | -0.125  | 2.0310  | -0.500  | ( -3.00, 3.00)    |  |

Source Listing: 10.1, 10.2, 10.3, 10.4

SAS program path: U:\Project Folders - UK\Collectar\XV008001\Statistics\SASProgs\T11\_1.sas SSasidharapanickar

08APR2010 10:16

Table 11.1  
 Summary of Laboratory Data - Quantitative  
 Safety Population (N = 8)

| Laboratory Type | Parameter                                  | Visit    | I-131-CLR1404 |         |         |         |                  |
|-----------------|--------------------------------------------|----------|---------------|---------|---------|---------|------------------|
|                 |                                            |          | N             | Mean    | Std Dev | Median  | Range            |
| Lipids          | LDL (mg/dL)                                | Baseline | 6             | 112.667 | 28.4441 | 119.500 | ( 76.00, 147.00) |
|                 |                                            | Day 3    | 6             | 109.167 | 24.8308 | 114.500 | ( 72.00, 144.00) |
|                 | LDL (mg/dL) Change from Baseline           | Day 3    | 6             | -3.500  | 10.5404 | -3.500  | ( -17.00, 15.00) |
|                 | Triglycerides (mg/dL)                      | Baseline | 8             | 106.375 | 28.3697 | 106.000 | ( 59.00, 143.00) |
|                 |                                            | Day 3    | 8             | 106.375 | 36.3473 | 98.500  | ( 53.00, 162.00) |
|                 | Triglycerides (mg/dL) Change from Baseline | Day 3    | 8             | 0.000   | 21.0034 | 1.000   | ( -43.00, 25.00) |

Source Listing: 10.1, 10.2, 10.3, 10.4

SAS program path: U:\Project Folders - UK\Collectar\XVO08001\Statistics\SASProgs\T11\_1.sas SSasidharapanickar

08APR2010 10:16

Table 11.2  
 Summary of Laboratory Data - Qualitative  
 Safety Population (N = 8)

| Laboratory Type | Parameter  | Visit     | I-131-CLR1404<br>N (%) |            |            |           |           |
|-----------------|------------|-----------|------------------------|------------|------------|-----------|-----------|
|                 |            |           | None                   | Trace      | +          | ++        | +++       |
| Urinalysis      | Protien    | Screening | 6 ( 75.0%)             | 0 ( 0.0%)  | 1 ( 12.5%) | 0 ( 0.0%) | 0 ( 0.0%) |
|                 |            | Baseline  | 5 ( 62.5%)             | 0 ( 0.0%)  | 0 ( 0.0%)  | 0 ( 0.0%) | 0 ( 0.0%) |
|                 |            | Day 6     | 5 ( 62.5%)             | 2 ( 25.0%) | 0 ( 0.0%)  | 0 ( 0.0%) | 0 ( 0.0%) |
|                 |            | Day 14    | 8 (100.0%)             | 0 ( 0.0%)  | 0 ( 0.0%)  | 0 ( 0.0%) | 0 ( 0.0%) |
|                 |            | Day 30    | 6 ( 75.0%)             | 2 ( 25.0%) | 0 ( 0.0%)  | 0 ( 0.0%) | 0 ( 0.0%) |
|                 |            | Day 42    | 5 ( 62.5%)             | 1 ( 12.5%) | 0 ( 0.0%)  | 0 ( 0.0%) | 0 ( 0.0%) |
|                 |            | Glucose   | Screening              | 8 (100.0%) | 0 ( 0.0%)  | 0 ( 0.0%) | 0 ( 0.0%) |
|                 | Baseline   |           | 6 ( 75.0%)             | 0 ( 0.0%)  | 0 ( 0.0%)  | 0 ( 0.0%) | 0 ( 0.0%) |
|                 | Day 6      |           | 8 (100.0%)             | 0 ( 0.0%)  | 0 ( 0.0%)  | 0 ( 0.0%) | 0 ( 0.0%) |
|                 | Day 14     |           | 8 (100.0%)             | 0 ( 0.0%)  | 0 ( 0.0%)  | 0 ( 0.0%) | 0 ( 0.0%) |
|                 | Day 30     |           | 7 ( 87.5%)             | 1 ( 12.5%) | 0 ( 0.0%)  | 0 ( 0.0%) | 0 ( 0.0%) |
|                 | Day 42     |           | 6 ( 75.0%)             | 0 ( 0.0%)  | 0 ( 0.0%)  | 0 ( 0.0%) | 0 ( 0.0%) |
|                 | Hemoglobin |           | Screening              | 8 (100.0%) | 0 ( 0.0%)  | 0 ( 0.0%) | 0 ( 0.0%) |
|                 |            | Baseline  | 6 ( 75.0%)             | 0 ( 0.0%)  | 0 ( 0.0%)  | 0 ( 0.0%) | 0 ( 0.0%) |
|                 |            | Day 6     | 7 ( 87.5%)             | 1 ( 12.5%) | 0 ( 0.0%)  | 0 ( 0.0%) | 0 ( 0.0%) |
|                 |            | Day 14    | 7 ( 87.5%)             | 0 ( 0.0%)  | 0 ( 0.0%)  | 0 ( 0.0%) | 0 ( 0.0%) |
|                 |            | Day 30    | 8 (100.0%)             | 0 ( 0.0%)  | 0 ( 0.0%)  | 0 ( 0.0%) | 0 ( 0.0%) |
|                 |            | Day 42    | 5 ( 62.5%)             | 1 ( 12.5%) | 0 ( 0.0%)  | 0 ( 0.0%) | 0 ( 0.0%) |

Source Listing: 10.3



Table 11.2  
 Summary of Laboratory Data - Qualitative  
 Safety Population (N = 8)

| Laboratory Type | Parameter | Visit     | I-131-CLR1404<br>N (%) |            |           |           |           |
|-----------------|-----------|-----------|------------------------|------------|-----------|-----------|-----------|
|                 |           |           | None                   | Trace      | +         | ++        | +++       |
| Urinalysis      | Ketones   | Screening | 7 ( 87.5%)             | 1 ( 12.5%) | 0 ( 0.0%) | 0 ( 0.0%) | 0 ( 0.0%) |
|                 |           | Baseline  | 6 ( 75.0%)             | 0 ( 0.0%)  | 0 ( 0.0%) | 0 ( 0.0%) | 0 ( 0.0%) |
|                 |           | Day 6     | 7 ( 87.5%)             | 0 ( 0.0%)  | 0 ( 0.0%) | 0 ( 0.0%) | 0 ( 0.0%) |
|                 |           | Day 14    | 8 (100.0%)             | 0 ( 0.0%)  | 0 ( 0.0%) | 0 ( 0.0%) | 0 ( 0.0%) |
|                 |           | Day 30    | 8 (100.0%)             | 0 ( 0.0%)  | 0 ( 0.0%) | 0 ( 0.0%) | 0 ( 0.0%) |
|                 |           | Day 42    | 6 ( 75.0%)             | 0 ( 0.0%)  | 0 ( 0.0%) | 0 ( 0.0%) | 0 ( 0.0%) |
|                 | Bilirubin | Screening | 5 ( 62.5%)             | 0 ( 0.0%)  | 0 ( 0.0%) | 0 ( 0.0%) | 0 ( 0.0%) |
|                 |           | Baseline  | 5 ( 62.5%)             | 0 ( 0.0%)  | 0 ( 0.0%) | 0 ( 0.0%) | 0 ( 0.0%) |
|                 |           | Day 6     | 5 ( 62.5%)             | 0 ( 0.0%)  | 0 ( 0.0%) | 0 ( 0.0%) | 0 ( 0.0%) |
|                 |           | Day 14    | 5 ( 62.5%)             | 0 ( 0.0%)  | 0 ( 0.0%) | 0 ( 0.0%) | 0 ( 0.0%) |
|                 |           | Day 30    | 5 ( 62.5%)             | 0 ( 0.0%)  | 0 ( 0.0%) | 0 ( 0.0%) | 0 ( 0.0%) |
|                 |           | Day 42    | 5 ( 62.5%)             | 0 ( 0.0%)  | 0 ( 0.0%) | 0 ( 0.0%) | 0 ( 0.0%) |
|                 | Casts     | Screening | 5 ( 62.5%)             | 0 ( 0.0%)  | 0 ( 0.0%) | 0 ( 0.0%) | 0 ( 0.0%) |
|                 |           | Baseline  | 3 ( 37.5%)             | 0 ( 0.0%)  | 0 ( 0.0%) | 0 ( 0.0%) | 0 ( 0.0%) |
|                 |           | Day 6     | 5 ( 62.5%)             | 0 ( 0.0%)  | 0 ( 0.0%) | 0 ( 0.0%) | 0 ( 0.0%) |
|                 |           | Day 14    | 5 ( 62.5%)             | 0 ( 0.0%)  | 0 ( 0.0%) | 0 ( 0.0%) | 0 ( 0.0%) |
|                 |           | Day 30    | 5 ( 62.5%)             | 0 ( 0.0%)  | 0 ( 0.0%) | 0 ( 0.0%) | 0 ( 0.0%) |
|                 |           | Day 42    | 3 ( 37.5%)             | 0 ( 0.0%)  | 0 ( 0.0%) | 0 ( 0.0%) | 0 ( 0.0%) |

Source Listing: 10.3

Table 11.2  
 Summary of Laboratory Data - Qualitative  
 Safety Population (N = 8)

| Laboratory Type | Parameter        | Visit     | I-131-CLR1404<br>N (%) |                  |                |              |               |
|-----------------|------------------|-----------|------------------------|------------------|----------------|--------------|---------------|
|                 |                  |           | None                   | Amorphous Urates | Many Amorphous | Few Squamous | Rare Squamous |
| Urinalysis      | Crystals         | Screening | 4 ( 50.0%)             | 1 ( 12.5%)       | 0 ( 0.0%)      | 0 ( 0.0%)    | 0 ( 0.0%)     |
|                 |                  | Baseline  | 5 ( 62.5%)             | 0 ( 0.0%)        | 0 ( 0.0%)      | 0 ( 0.0%)    | 0 ( 0.0%)     |
|                 |                  | Day 6     | 7 ( 87.5%)             | 0 ( 0.0%)        | 0 ( 0.0%)      | 0 ( 0.0%)    | 0 ( 0.0%)     |
|                 |                  | Day 14    | 7 ( 87.5%)             | 0 ( 0.0%)        | 0 ( 0.0%)      | 0 ( 0.0%)    | 0 ( 0.0%)     |
|                 |                  | Day 30    | 6 ( 75.0%)             | 0 ( 0.0%)        | 1 ( 12.5%)     | 0 ( 0.0%)    | 0 ( 0.0%)     |
|                 |                  | Day 42    | 5 ( 62.5%)             | 0 ( 0.0%)        | 0 ( 0.0%)      | 0 ( 0.0%)    | 0 ( 0.0%)     |
|                 |                  | Screening | 1 ( 12.5%)             | 0 ( 0.0%)        | 0 ( 0.0%)      | 0 ( 0.0%)    | 1 ( 12.5%)    |
|                 | Epithelial Cells | Baseline  | 1 ( 12.5%)             | 0 ( 0.0%)        | 0 ( 0.0%)      | 0 ( 0.0%)    | 1 ( 12.5%)    |
|                 |                  | Day 6     | 1 ( 12.5%)             | 0 ( 0.0%)        | 0 ( 0.0%)      | 1 ( 12.5%)   | 0 ( 0.0%)     |
|                 |                  | Day 14    | 1 ( 12.5%)             | 0 ( 0.0%)        | 0 ( 0.0%)      | 0 ( 0.0%)    | 1 ( 12.5%)    |
|                 |                  | Day 30    | 2 ( 25.0%)             | 0 ( 0.0%)        | 0 ( 0.0%)      | 0 ( 0.0%)    | 0 ( 0.0%)     |
|                 |                  | Day 42    | 1 ( 12.5%)             | 0 ( 0.0%)        | 0 ( 0.0%)      | 0 ( 0.0%)    | 1 ( 12.5%)    |

Source Listing: 10.3

Table 12  
 Summary of Concomitant Medications

Safety Population (N= 8)

| Preferred Term                                  | I-131-CLR1404<br>N (%) | Medications |
|-------------------------------------------------|------------------------|-------------|
| NUMBER OF PATIENTS WITH CONCOMITANT MEDICATIONS | 8 (100.0%)             | 61          |
| POTASSIUM IODIDE                                | 8 (100.0%)             | 8           |
| ACETYLSALICYLIC ACID                            | 3 ( 37.5%)             | 3           |
| DOCUSATE SODIUM                                 | 3 ( 37.5%)             | 3           |
| CLONALIN                                        | 2 ( 25.0%)             | 3           |
| CALCIUM                                         | 2 ( 25.0%)             | 2           |
| LISINOPRIL                                      | 2 ( 25.0%)             | 2           |
| MULTIVITAMINS                                   | 2 ( 25.0%)             | 2           |
| SIMVASTATIN                                     | 2 ( 25.0%)             | 2           |
| LOMOTIL /00034001/                              | 1 ( 12.5%)             | 2           |
| ALFUZOSIN HYDROCHLORIDE                         | 1 ( 12.5%)             | 1           |
| BACITRACIN                                      | 1 ( 12.5%)             | 1           |
| CALCIUM WITH VITAMIN D /01233101/               | 1 ( 12.5%)             | 1           |
| CEFALEXIN                                       | 1 ( 12.5%)             | 1           |
| CENTRUM SILVER /06027401/                       | 1 ( 12.5%)             | 1           |
| COLECALCIFEROL                                  | 1 ( 12.5%)             | 1           |
| COTYLENOL                                       | 1 ( 12.5%)             | 1           |
| DEXTROMETHORPHAN HYDROBROMIDE                   | 1 ( 12.5%)             | 1           |
| DIPHENHYDRAMINE                                 | 1 ( 12.5%)             | 1           |
| DUTASTERIDE                                     | 1 ( 12.5%)             | 1           |
| ENALAPRIL MALEATE                               | 1 ( 12.5%)             | 1           |
| ENOXAPARIN SODIUM                               | 1 ( 12.5%)             | 1           |
| ESCITALOPRAM OXALATE                            | 1 ( 12.5%)             | 1           |
| FISH OIL                                        | 1 ( 12.5%)             | 1           |

Source Listing: 11

Note: All percentages are determined from a denominator of all patients in the safety population.

If a patient has more than one medication with a given preferred term, it is counted for each medication in the count of medications for that preferred term, and counted once for that patient in the count of patients for that preferred term.

Table 12  
 Summary of Concomitant Medications

Safety Population (N= 8)

| Preferred Term           | I-131-CLR1404<br>N (%) | Medications |
|--------------------------|------------------------|-------------|
| GABAPENTIN               | 1 ( 12.5%)             | 1           |
| HYDROCORTISONE           | 1 ( 12.5%)             | 1           |
| IBUPROFEN                | 1 ( 12.5%)             | 1           |
| INFLUENZA VACCINE        | 1 ( 12.5%)             | 1           |
| LEVOTHYROXINE SODIUM     | 1 ( 12.5%)             | 1           |
| LORAZEPAM                | 1 ( 12.5%)             | 1           |
| LOVASTATIN               | 1 ( 12.5%)             | 1           |
| METFORMIN                | 1 ( 12.5%)             | 1           |
| METOPROLOL SUCCINATE     | 1 ( 12.5%)             | 1           |
| MORPHINE SULFATE         | 1 ( 12.5%)             | 1           |
| OMEPRAZOLE               | 1 ( 12.5%)             | 1           |
| OXYCOCET                 | 1 ( 12.5%)             | 1           |
| PREDNISONE               | 1 ( 12.5%)             | 1           |
| PSEUDOEPHEDRINE          | 1 ( 12.5%)             | 1           |
| RANIBIZUMAB              | 1 ( 12.5%)             | 1           |
| RANITIDINE               | 1 ( 12.5%)             | 1           |
| TAMSULOSIN HYDROCHLORIDE | 1 ( 12.5%)             | 1           |
| VICODIN                  | 1 ( 12.5%)             | 1           |
| VITAMIN E /01552201/     | 1 ( 12.5%)             | 1           |
| ZOLEDRONIC ACID          | 1 ( 12.5%)             | 1           |

Source Listing: 11

Note: All percentages are determined from a denominator of all patients in the safety population.

If a patient has more than one medication with a given preferred term, it is counted for each medication in the count of medications for that preferred term, and counted once for that patient in the count of patients for that preferred term.

Table 13  
 Summary of Vital Signs  
 Safety Population (N = 8)

| Parameter                             | Visit                                                      | I-131-CLR1404 |       |         |        |             |            |
|---------------------------------------|------------------------------------------------------------|---------------|-------|---------|--------|-------------|------------|
|                                       |                                                            | N             | Mean  | Std Dev | Median | Range       |            |
| Supine Systolic Blood Pressure (mmHg) | Screening                                                  | 8             | 130.3 | 13.54   | 132.5  | ( 109, 148) |            |
|                                       | Baseline                                                   | 8             | 124.3 | 12.28   | 121.0  | ( 110, 141) |            |
|                                       | 5 Minutes                                                  | 8             | 126.8 | 12.38   | 123.5  | ( 116, 156) |            |
|                                       | 15 Minutes                                                 | 8             | 125.4 | 17.37   | 124.0  | ( 104, 157) |            |
|                                       | 30 Minutes                                                 | 5             | 131.6 | 12.22   | 130.0  | ( 117, 148) |            |
|                                       | 60 Minutes                                                 | 8             | 130.8 | 9.33    | 126.5  | ( 120, 147) |            |
|                                       | 4 - 6 Hours                                                | 8             | 121.3 | 11.16   | 123.5  | ( 107, 140) |            |
|                                       | Day 1                                                      | 7             | 129.6 | 9.07    | 134.0  | ( 117, 141) |            |
|                                       | Day 2                                                      | 8             | 125.9 | 6.90    | 125.5  | ( 117, 139) |            |
|                                       | Day 3                                                      | 8             | 121.4 | 17.25   | 121.5  | ( 101, 153) |            |
|                                       | Day 6                                                      | 8             | 124.1 | 9.76    | 125.0  | ( 107, 138) |            |
|                                       | Day 14                                                     | 8             | 123.9 | 17.59   | 120.0  | ( 95, 147)  |            |
|                                       | Day 30                                                     | 8             | 129.1 | 18.92   | 132.5  | ( 102, 150) |            |
|                                       | Day 42                                                     | 8             | 131.4 | 14.99   | 127.0  | ( 110, 156) |            |
|                                       | Supine Systolic Blood Pressure (mmHg) Change from Baseline | 5 Minutes     | 8     | 2.5     | 12.46  | 5.5         | ( -15, 16) |
|                                       |                                                            | 15 Minutes    | 8     | 1.1     | 17.04  | 8.0         | ( -30, 17) |
| 30 Minutes                            |                                                            | 5             | 9.8   | 7.43    | 7.0    | ( 5, 23)    |            |
| 60 Minutes                            |                                                            | 8             | 6.5   | 14.36   | 4.0    | ( -12, 31)  |            |
| 4 - 6 Hours                           |                                                            | 8             | -3.0  | 7.91    | -1.5   | ( -14, 8)   |            |
| Day 1                                 |                                                            | 7             | 3.6   | 12.58   | 3.0    | ( -18, 18)  |            |
| Day 2                                 |                                                            | 8             | 1.6   | 10.32   | 4.5    | ( -16, 13)  |            |
| Day 3                                 |                                                            | 8             | -2.9  | 10.23   | -5.5   | ( -14, 16)  |            |
| Day 6                                 |                                                            | 8             | -0.1  | 10.60   | 2.5    | ( -20, 12)  |            |
| Day 14                                |                                                            | 8             | -0.4  | 15.03   | 0.5    | ( -21, 28)  |            |
| Day 30                                |                                                            | 8             | 4.9   | 21.05   | 5.0    | ( -34, 36)  |            |
| Day 42                                |                                                            | 8             | 7.1   | 8.69    | 10.5   | ( -7, 15)   |            |

Source Listing: 12

Table 13  
 Summary of Vital Signs  
 Safety Population (N = 8)

| Parameter                              | Visit                                                       | I-131-CLR1404 |      |         |        |            |            |
|----------------------------------------|-------------------------------------------------------------|---------------|------|---------|--------|------------|------------|
|                                        |                                                             | N             | Mean | Std Dev | Median | Range      |            |
| Supine Diastolic Blood Pressure (mmHg) | Screening                                                   | 8             | 77.3 | 5.44    | 77.0   | ( 70, 84)  |            |
|                                        | Baseline                                                    | 8             | 71.3 | 7.23    | 71.0   | ( 60, 83)  |            |
|                                        | 5 Minutes                                                   | 8             | 76.0 | 9.32    | 78.0   | ( 60, 87)  |            |
|                                        | 15 Minutes                                                  | 8             | 75.4 | 9.97    | 76.0   | ( 60, 88)  |            |
|                                        | 30 Minutes                                                  | 5             | 79.6 | 2.79    | 81.0   | ( 75, 82)  |            |
|                                        | 60 Minutes                                                  | 8             | 77.4 | 8.16    | 79.0   | ( 68, 92)  |            |
|                                        | 4 - 6 Hours                                                 | 8             | 72.1 | 11.66   | 70.5   | ( 56, 89)  |            |
|                                        | Day 1                                                       | 7             | 78.6 | 7.00    | 81.0   | ( 67, 86)  |            |
|                                        | Day 2                                                       | 8             | 74.3 | 5.18    | 72.5   | ( 70, 86)  |            |
|                                        | Day 3                                                       | 8             | 72.4 | 8.78    | 76.5   | ( 55, 81)  |            |
|                                        | Day 6                                                       | 8             | 75.4 | 9.04    | 74.0   | ( 64, 88)  |            |
|                                        | Day 14                                                      | 8             | 74.3 | 7.50    | 75.0   | ( 64, 88)  |            |
|                                        | Day 30                                                      | 8             | 73.9 | 9.48    | 75.0   | ( 59, 89)  |            |
|                                        | Day 42                                                      | 8             | 77.8 | 6.14    | 76.5   | ( 70, 87)  |            |
|                                        | Supine Diastolic Blood Pressure (mmHg) Change from Baseline | 5 Minutes     | 8    | 4.8     | 4.71   | 5.5        | ( -2, 11)  |
|                                        |                                                             | 15 Minutes    | 8    | 4.1     | 10.53  | 2.5        | ( -15, 18) |
| 30 Minutes                             |                                                             | 5             | 4.6  | 7.06    | 6.0    | ( -2, 15)  |            |
| 60 Minutes                             |                                                             | 8             | 6.1  | 7.04    | 7.5    | ( -9, 13)  |            |
| 4 - 6 Hours                            |                                                             | 8             | 0.9  | 8.29    | -3.0   | ( -6, 16)  |            |
| Day 1                                  |                                                             | 7             | 5.7  | 7.78    | 7.0    | ( -10, 12) |            |
| Day 2                                  |                                                             | 8             | 3.0  | 5.81    | 3.5    | ( -6, 11)  |            |
| Day 3                                  |                                                             | 8             | 1.1  | 7.14    | 1.0    | ( -10, 12) |            |
| Day 6                                  |                                                             | 8             | 4.1  | 9.63    | 6.5    | ( -11, 15) |            |
| Day 14                                 |                                                             | 8             | 3.0  | 10.53   | 2.5    | ( -10, 21) |            |
| Day 30                                 |                                                             | 8             | 2.6  | 9.52    | 4.0    | ( -11, 15) |            |
| Day 42                                 |                                                             | 8             | 6.5  | 2.73    | 6.0    | ( 3, 10)   |            |

Source Listing: 12

Table 13  
 Summary of Vital Signs  
 Safety Population (N = 8)

| Parameter   | Visit                            | I-131-CLR1404 |      |         |        |            |            |
|-------------|----------------------------------|---------------|------|---------|--------|------------|------------|
|             |                                  | N             | Mean | Std Dev | Median | Range      |            |
| Pulse (bpm) | Screening                        | 8             | 72.1 | 15.91   | 68.5   | ( 56, 107) |            |
|             | Baseline                         | 8             | 75.6 | 12.65   | 74.5   | ( 59, 101) |            |
|             | 5 Minutes                        | 8             | 71.6 | 11.55   | 71.0   | ( 58, 91)  |            |
|             | 15 Minutes                       | 8             | 73.1 | 15.45   | 71.5   | ( 52, 101) |            |
|             | 30 Minutes                       | 5             | 75.0 | 18.77   | 71.0   | ( 53, 102) |            |
|             | 60 Minutes                       | 8             | 69.1 | 14.11   | 69.5   | ( 52, 96)  |            |
|             | 4 - 6 Hours                      | 8             | 79.1 | 11.68   | 78.0   | ( 67, 104) |            |
|             | Day 1                            | 7             | 75.4 | 14.42   | 76.0   | ( 55, 96)  |            |
|             | Day 2                            | 8             | 78.8 | 17.61   | 74.0   | ( 57, 116) |            |
|             | Day 3                            | 8             | 76.5 | 9.62    | 75.0   | ( 65, 91)  |            |
|             | Day 6                            | 8             | 75.3 | 14.16   | 75.5   | ( 52, 94)  |            |
|             | Day 14                           | 8             | 74.4 | 14.67   | 68.5   | ( 61, 101) |            |
|             | Day 30                           | 8             | 79.0 | 12.60   | 81.5   | ( 61, 100) |            |
|             | Day 42                           | 8             | 79.4 | 16.87   | 80.5   | ( 54, 108) |            |
|             | Pulse (bpm) Change from Baseline | 5 Minutes     | 8    | -4.0    | 7.19   | -5.0       | ( -15, 6)  |
|             |                                  | 15 Minutes    | 8    | -2.5    | 9.55   | -2.0       | ( -21, 11) |
| 30 Minutes  |                                  | 5             | -3.8 | 10.96   | 1.0    | ( -20, 6)  |            |
| 60 Minutes  |                                  | 8             | -6.5 | 6.26    | -5.5   | ( -18, 4)  |            |
| 4 - 6 Hours |                                  | 8             | 3.5  | 4.93    | 4.0    | ( -4, 10)  |            |
| Day 1       |                                  | 7             | -1.0 | 9.61    | 1.0    | ( -19, 10) |            |
| Day 2       |                                  | 8             | 3.1  | 7.34    | 2.5    | ( -8, 15)  |            |
| Day 3       |                                  | 8             | 0.9  | 7.75    | 2.0    | ( -12, 11) |            |
| Day 6       |                                  | 8             | -0.4 | 9.32    | 0.5    | ( -16, 12) |            |
| Day 14      |                                  | 8             | -1.3 | 12.50   | -4.5   | ( -20, 21) |            |
| Day 30      |                                  | 8             | 3.4  | 11.06   | 5.0    | ( -14, 20) |            |
| Day 42      |                                  | 8             | 3.8  | 13.64   | -0.5   | ( -15, 28) |            |

Source Listing: 12

Table 13  
 Summary of Vital Signs  
 Safety Population (N = 8)

| Parameter        | Visit                                 | I-131-CLR1404 |       |         |        |               |
|------------------|---------------------------------------|---------------|-------|---------|--------|---------------|
|                  |                                       | N             | Mean  | Std Dev | Median | Range         |
| Temperature (oC) | Screening                             | 8             | 36.61 | 0.236   | 36.65  | ( 36.1, 36.8) |
|                  | Baseline                              | 8             | 36.58 | 0.544   | 36.70  | ( 35.7, 37.3) |
|                  | 5 Minutes                             | 8             | 36.75 | 0.278   | 36.70  | ( 36.4, 37.3) |
|                  | 15 Minutes                            | 8             | 36.65 | 0.407   | 36.65  | ( 36.1, 37.5) |
|                  | 30 Minutes                            | 5             | 36.46 | 0.152   | 36.50  | ( 36.3, 36.6) |
|                  | 60 Minutes                            | 8             | 36.65 | 0.307   | 36.60  | ( 36.3, 37.3) |
|                  | 4 - 6 Hours                           | 7             | 36.51 | 0.398   | 36.50  | ( 35.9, 37.2) |
|                  | Day 1                                 | 7             | 36.57 | 0.525   | 36.30  | ( 35.9, 37.4) |
|                  | Day 2                                 | 8             | 36.51 | 0.436   | 36.60  | ( 35.8, 37.2) |
|                  | Day 3                                 | 8             | 36.34 | 0.338   | 36.45  | ( 35.8, 36.7) |
|                  | Day 6                                 | 8             | 36.69 | 0.318   | 36.65  | ( 36.3, 37.3) |
|                  | Day 14                                | 7             | 36.57 | 0.395   | 36.70  | ( 35.7, 36.8) |
|                  | Day 30                                | 8             | 36.34 | 0.518   | 36.45  | ( 35.6, 37.0) |
|                  | Day 42                                | 8             | 36.34 | 0.661   | 36.60  | ( 35.2, 37.0) |
|                  | Temperature (oC) Change from Baseline | 5 Minutes     | 8     | 0.18    | 0.471  | 0.05          |
| 15 Minutes       |                                       | 8             | 0.08  | 0.446   | 0.05   | ( -0.5, 0.6)  |
| 30 Minutes       |                                       | 5             | 0.14  | 0.434   | 0.00   | ( -0.3, 0.6)  |
| 60 Minutes       |                                       | 8             | 0.08  | 0.456   | 0.05   | ( -0.5, 0.8)  |
| 4 - 6 Hours      |                                       | 7             | -0.06 | 0.399   | -0.20  | ( -0.4, 0.6)  |
| Day 1            |                                       | 7             | -0.00 | 0.408   | -0.10  | ( -0.5, 0.6)  |
| Day 2            |                                       | 8             | -0.06 | 0.560   | -0.15  | ( -0.8, 0.8)  |
| Day 3            |                                       | 8             | -0.24 | 0.469   | -0.40  | ( -0.7, 0.5)  |
| Day 6            |                                       | 8             | 0.11  | 0.344   | 0.00   | ( -0.2, 0.8)  |
| Day 14           |                                       | 7             | -0.13 | 0.585   | -0.20  | ( -0.9, 0.7)  |
| Day 30           |                                       | 8             | -0.24 | 0.521   | -0.30  | ( -1.0, 0.8)  |
| Day 42           |                                       | 8             | -0.24 | 0.496   | -0.30  | ( -0.9, 0.8)  |

Source Listing: 12



Table 13  
 Summary of Vital Signs  
 Safety Population (N = 8)

| Parameter              | Visit                                       | I-131-CLR1404 |      |         |        |           |
|------------------------|---------------------------------------------|---------------|------|---------|--------|-----------|
|                        |                                             | N             | Mean | Std Dev | Median | Range     |
| Respiration Rate (bpm) | Screening                                   | 8             | 17.8 | 2.05    | 17.5   | ( 15, 20) |
|                        | Baseline                                    | 8             | 19.5 | 2.98    | 20.0   | ( 14, 24) |
|                        | 5 Minutes                                   | 7             | 19.4 | 2.76    | 20.0   | ( 16, 24) |
|                        | 15 Minutes                                  | 7             | 18.4 | 3.15    | 18.0   | ( 15, 24) |
|                        | 30 Minutes                                  | 5             | 19.4 | 5.18    | 16.0   | ( 15, 26) |
|                        | 60 Minutes                                  | 8             | 18.3 | 2.71    | 19.0   | ( 14, 22) |
|                        | 4 - 6 Hours                                 | 8             | 18.3 | 3.11    | 20.0   | ( 14, 22) |
|                        | Day 1                                       | 6             | 18.2 | 2.23    | 19.0   | ( 15, 20) |
|                        | Day 2                                       | 8             | 18.5 | 4.11    | 20.0   | ( 12, 24) |
|                        | Day 3                                       | 7             | 18.9 | 2.73    | 18.0   | ( 16, 24) |
|                        | Day 6                                       | 8             | 18.5 | 2.00    | 18.0   | ( 16, 22) |
|                        | Day 14                                      | 8             | 18.6 | 1.92    | 18.0   | ( 16, 22) |
|                        | Day 30                                      | 8             | 19.4 | 2.45    | 20.0   | ( 16, 24) |
|                        | Day 42                                      | 8             | 18.5 | 1.69    | 18.0   | ( 17, 22) |
|                        | Respiration Rate (bpm) Change from Baseline | 5 Minutes     | 7    | 0.6     | 2.23   | 0.0       |
| 15 Minutes             |                                             | 7             | -0.4 | 1.99    | 0.0    | ( -3, 2)  |
| 30 Minutes             |                                             | 5             | 0.2  | 2.05    | 1.0    | ( -2, 2)  |
| 60 Minutes             |                                             | 8             | -1.3 | 1.83    | -2.0   | ( -4, 2)  |
| 4 - 6 Hours            |                                             | 8             | -1.3 | 2.12    | -1.0   | ( -4, 2)  |
| Day 1                  |                                             | 6             | -1.2 | 2.86    | -1.5   | ( -4, 2)  |
| Day 2                  |                                             | 8             | -1.0 | 3.85    | -1.0   | ( -8, 4)  |
| Day 3                  |                                             | 7             | -0.3 | 2.21    | 0.0    | ( -3, 3)  |
| Day 6                  |                                             | 8             | -1.0 | 2.45    | -2.0   | ( -4, 3)  |
| Day 14                 |                                             | 8             | -0.9 | 2.23    | -2.0   | ( -3, 4)  |
| Day 30                 |                                             | 8             | -0.1 | 2.75    | 0.0    | ( -4, 4)  |
| Day 42                 |                                             | 8             | -1.0 | 2.88    | -1.0   | ( -6, 3)  |

Source Listing: 12

Table 13  
 Summary of Vital Signs  
 Safety Population (N = 8)

| Parameter            | Visit                                     | I-131-CLR1404 |      |         |        |            |          |
|----------------------|-------------------------------------------|---------------|------|---------|--------|------------|----------|
|                      |                                           | N             | Mean | Std Dev | Median | Range      |          |
| Saturated Oxygen (%) | Screening                                 | 7             | 96.9 | 1.46    | 97.0   | ( 95, 99)  |          |
|                      | Baseline                                  | 8             | 96.4 | 1.60    | 96.5   | ( 94, 98)  |          |
|                      | 5 Minutes                                 | 8             | 96.5 | 2.07    | 97.0   | ( 92, 98)  |          |
|                      | 15 Minutes                                | 8             | 96.3 | 2.31    | 96.5   | ( 93, 99)  |          |
|                      | 30 Minutes                                | 5             | 96.2 | 1.79    | 97.0   | ( 93, 97)  |          |
|                      | 60 Minutes                                | 8             | 97.1 | 1.46    | 97.0   | ( 95, 100) |          |
|                      | 4 - 6 Hours                               | 8             | 97.1 | 1.46    | 97.0   | ( 95, 100) |          |
|                      | Day 1                                     | 7             | 97.6 | 1.72    | 98.0   | ( 95, 100) |          |
|                      | Day 2                                     | 8             | 96.9 | 1.64    | 97.0   | ( 95, 100) |          |
|                      | Day 3                                     | 7             | 96.6 | 0.98    | 97.0   | ( 95, 98)  |          |
|                      | Day 6                                     | 8             | 97.0 | 1.93    | 96.5   | ( 94, 100) |          |
|                      | Day 14                                    | 7             | 97.0 | 1.29    | 97.0   | ( 95, 99)  |          |
|                      | Day 30                                    | 6             | 97.3 | 1.86    | 97.0   | ( 95, 100) |          |
|                      | Day 42                                    | 6             | 97.2 | 0.75    | 97.0   | ( 96, 98)  |          |
|                      | Saturated Oxygen (%) Change from Baseline | 5 Minutes     | 8    | 0.1     | 1.46   | 0.0        | ( -2, 2) |
|                      |                                           | 15 Minutes    | 8    | -0.1    | 2.17   | -0.5       | ( -3, 4) |
| 30 Minutes           |                                           | 5             | -0.8 | 1.79    | -1.0   | ( -3, 2)   |          |
| 60 Minutes           |                                           | 8             | 0.8  | 1.39    | 1.0    | ( -1, 2)   |          |
| 4 - 6 Hours          |                                           | 8             | 0.8  | 1.16    | 1.0    | ( -1, 2)   |          |
| Day 1                |                                           | 7             | 1.0  | 1.29    | 1.0    | ( -1, 3)   |          |
| Day 2                |                                           | 8             | 0.5  | 1.31    | 0.0    | ( -1, 2)   |          |
| Day 3                |                                           | 7             | 0.0  | 1.15    | 0.0    | ( -1, 2)   |          |
| Day 6                |                                           | 8             | 0.6  | 2.00    | 0.5    | ( -2, 4)   |          |
| Day 14               |                                           | 7             | 0.4  | 1.81    | 0.0    | ( -1, 4)   |          |
| Day 30               |                                           | 6             | 0.5  | 1.76    | 0.0    | ( -1, 3)   |          |
| Day 42               |                                           | 6             | 0.3  | 1.86    | 0.0    | ( -2, 3)   |          |

Source Listing: 12

Table 13  
Summary of Vital Signs  
Safety Population (N = 8)

| Parameter                        | Visit     | I-131-CLR1404 |        |         |        |                |
|----------------------------------|-----------|---------------|--------|---------|--------|----------------|
|                                  |           | N             | Mean   | Std Dev | Median | Range          |
| Weight (kg)                      | Screening | 8             | 92.80  | 27.456  | 83.95  | ( 61.1, 143.7) |
|                                  | Baseline  | 6             | 86.25  | 21.324  | 84.30  | ( 61.2, 122.5) |
|                                  | Day 14    | 7             | 100.04 | 36.880  | 85.80  | ( 61.9, 172.2) |
| Weight (kg) Change from Baseline | Day 14    | 7             | 4.14   | 10.772  | 0.50   | ( -1.2, 28.5)  |

Source Listing: 12
