# Supplementary material for: A Phase 1 Study of 131I-CLR1404 in Patients with Relapsed or Refractory Advanced Solid Tumors: Dosimetry, Biodistribution, Pharmacokinetics, and Safety
Source: PubMed Central journal article supplement (PMC4234270; doi:10.1371/journal.pone.0111652), 2014-11-17
Supplement: pone.0111652.s005.pdf [file pone.0111652.s005.pdf]

**Table A.1: Plasma Concentrations (ng/mL) of CLR1404 following a Single Dose Infusion of 10 mCi of I-131-CLR1404**

| Dose and Route |         | 10 mCi I-131-CLR1404 Single Dose Administration via Intravenous Infusion |      |      |      |        |          |      |      |      |      |      |      |
|----------------|---------|--------------------------------------------------------------------------|------|------|------|--------|----------|------|------|------|------|------|------|
| Subject        |         | Time After Infusion (hr)                                                 |      |      |      |        |          |      |      |      |      |      |      |
| Number         | Predose | 0.0833                                                                   | 0.25 | 0.5  | 1    | 4 to 6 | 18 to 24 | 48   | 72   | 144  | 336  | 720  | 1008 |
| 001-101        | 0       | 36.2                                                                     | 66.9 | 63.7 | 64.8 | 44.0   | 15.0     | 25.3 | 27.1 | 26.7 | 19.6 | NS   | 9.42 |
| 001-102        | 0       | 54.6                                                                     | 53.7 | 50.5 | 48.7 | 29.1   | 19.1     | 17.8 | 15.5 | 14.2 | 11.7 | 7.94 | 5.64 |
| 001-103        | 0       | 91.3                                                                     | 80.1 | 77.1 | 65.4 | 52.2   | 32.5     | 28.4 | 23.0 | 22.4 | 19.6 | 12.8 | 10.7 |
| 003-201        | 0       | 73.5                                                                     | 63.0 | 59.3 | 50.1 | 32.1   | 24.2     | 24.0 | 20.0 | 19.3 | 13.5 | 11.2 | 9.13 |
| 005-301        | 0       | 63.5                                                                     | 58.9 | NS   | 55.0 | 36.4   | 20.0     | 17.9 | 14.1 | 14.7 | 12.4 | 8.88 | 7.03 |
| 005-302        | 0       | 70.1                                                                     | 69.0 | NS   | 55.0 | 44.2   | 24.8     | 23.4 | 21.5 | 20.1 | 17.8 | 13.0 | 10.6 |
| 007-401        | 0       | 84.0                                                                     | 72.4 | 70.2 | 62.0 | 47.0   | 31.4     | 26.4 | 24.1 | 22.2 | 19.4 | 16.1 | 10.6 |
| 007-402        | 0       | 73.8                                                                     | 63.9 | 63.0 | 67.6 | 48.1   | 28.9     | 23.5 | 23.6 | 20.8 | 16.8 | 13.5 | 10.4 |
| N              | 8       | 8                                                                        | 8    | 6    | 8    | 8      | 8        | 8    | 8    | 8    | 8    | 7    | 8    |
| Mean           | 0       | 68.4                                                                     | 66.0 | 64.0 | 58.6 | 41.6   | 24.5     | 23.3 | 21.1 | 20.1 | 16.4 | 11.9 | 9.19 |
| SD             | 0       | 17.2                                                                     | 8.1  | 9.1  | 7.3  | 8.2    | 6.2      | 3.8  | 4.4  | 4.1  | 3.3  | 2.8  | 1.89 |
| Min            | 0       | 36.2                                                                     | 53.7 | 50.5 | 48.7 | 29.1   | 15.0     | 17.8 | 14.1 | 14.2 | 11.7 | 7.94 | 5.64 |
| Median         | 0       | 71.8                                                                     | 65.4 | 63.4 | 58.5 | 44.1   | 24.5     | 23.8 | 22.3 | 20.5 | 17.3 | 12.8 | 9.91 |
| Max            | 0       | 91.3                                                                     | 80.1 | 77.1 | 67.6 | 52.2   | 32.5     | 28.4 | 27.1 | 26.7 | 19.6 | 16.1 | 10.7 |
| CV%            | NA      | 25                                                                       | 12   | 14   | 12   | 20     | 25       | 16   | 21   | 21   | 20   | 24   | 21   |

NS No sample.

NA Not applicable.

Note: Nominal timepoints are presented.
